# Supplementary material
Source: PubMed Central journal article supplement (PMC3470853)
Supplement: NIHMS397345-supplement-Supplementary_data.pdf [file NIHMS397345-supplement-Supplementary_data.pdf]

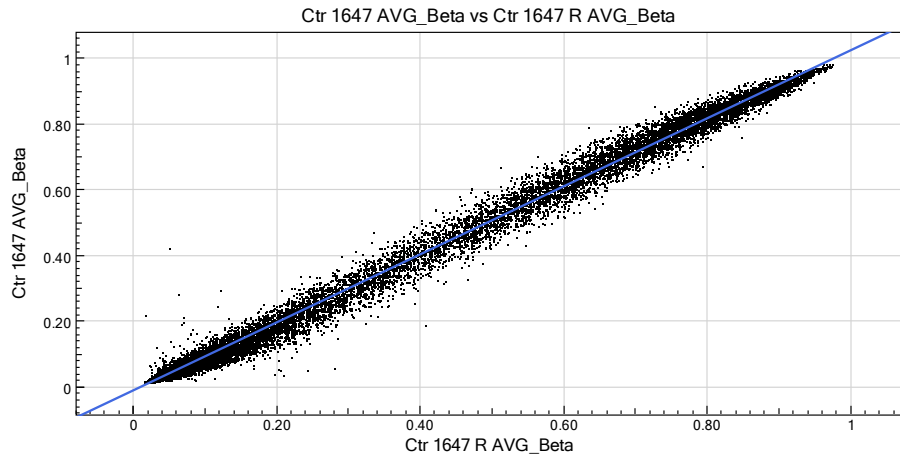

A

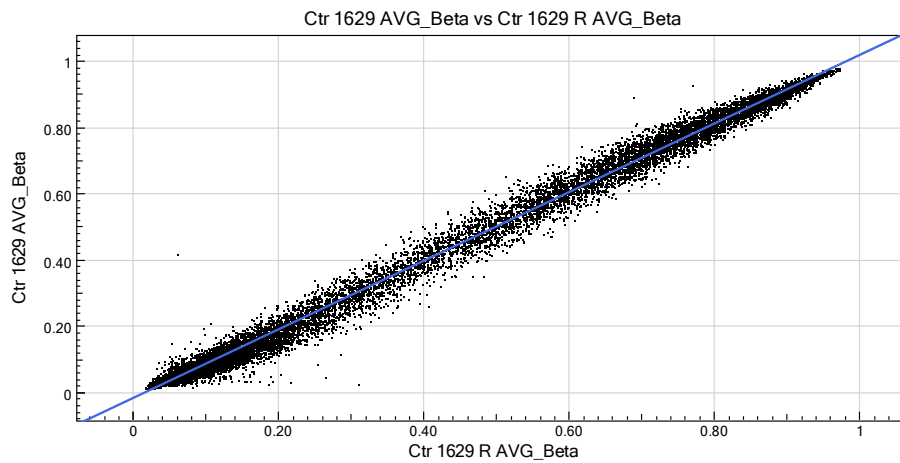

B

Figure S1.

Scatter plot and fitted linear regression of Illumina methylation data ( $\beta$ -values) for two technical replicates (A and B). Each dot corresponds to an Illumina CpG target. Each coordinate corresponds to one of the two technical replicates;  $r^2 = 0.9946$ ,  $Y = -0.01 + 1.0381X$  (A) and  $r^2 = 0.9949$ ,  $Y = -0.02 + 1.0367X$  (B)

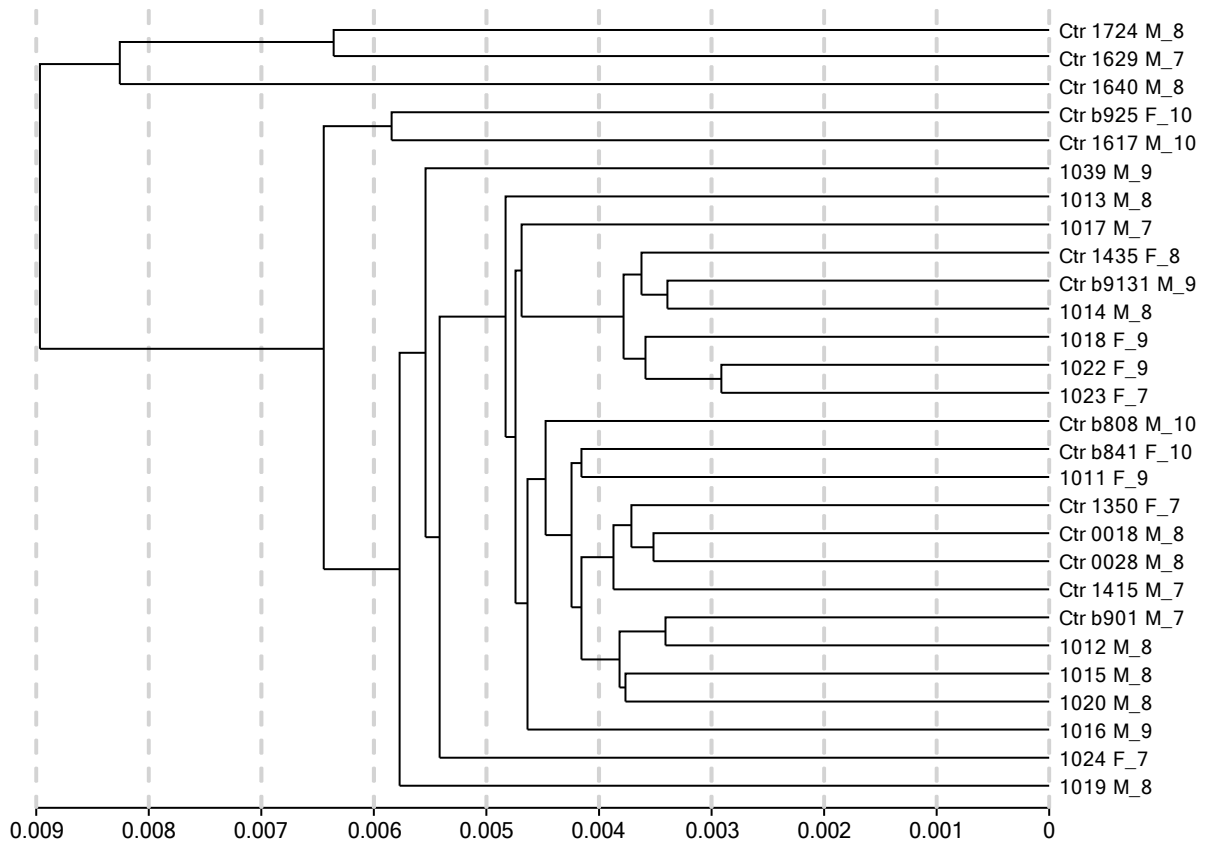

Figure S2.

Clustering analysis of 28 individuals from the group of institutionalized children and the group of children living with their biological families (labeled as Ctr) on the base on pairwise correlation of Illumina Infinium27 whole genome methylation profiles. CpG sites on the sex chromosomes were excluded to prevent interindividual variability by gender; 26,486 CpG sites were featured in this analysis. The gender is shown as M (male) or F (female), the digit shows age of the child.

The dendrogram shows that, with rare exceptions, individuals from the same group (“Institutionalized Children” and “Comparison Children”) are clustered together in the closest clusters of the first order.

Table S1

List of Illumina probes have shown statistically significant ( $p < 0.01$ ) differences in methylation level measurements in pair-wise comparison between technical replicates of samples Ctr1629 and Ctr1647, consequently. The expected error in detecting the methylation level of CpG sites does not exceed 0.05% of the total number of 27,578 probes contained in the Infinium27 array.

| N                                   | Index | TargetID   | Gene symbol | Sample   |           | Replicate |           | Delta Beta | DiffScore |
|-------------------------------------|-------|------------|-------------|----------|-----------|-----------|-----------|------------|-----------|
|                                     |       |            |             | AvgBeta  | Intensity | AvgBeta   | Intensity |            |           |
| <b>Ctr1629 vs Ctr1629-replicate</b> |       |            |             |          |           |           |           |            |           |
| 1                                   | 6226  | cg06255227 | NPBWR2      | 0.891329 | 11605     | 0.688702  | 14876     | -0.202627  | -41.6447  |
| 2                                   | 3194  | cg03161453 | BCOR        | 0.926375 | 10698     | 0.769047  | 10387     | -0.157328  | -35.4653  |
| 3                                   | 23654 | cg23695504 | FLJ45717    | 0.035360 | 27247     | 0.153168  | 30200     | 0.117808   | 23.8742   |
| 4                                   | 24312 | cg24356797 | UBA52       | 0.033228 | 20485     | 0.155306  | 24033     | 0.122078   | 25.2933   |
| 5                                   | 15714 | cg15687659 | RAB7        | 0.034796 | 22575     | 0.160078  | 26131     | 0.125282   | 25.8768   |
| 6                                   | 25328 | cg25346576 | CCDC55      | 0.049404 | 13907     | 0.187579  | 15019     | 0.138175   | 26.9697   |
| 7                                   | 12514 | cg12582366 | FLJ32130    | 0.115487 | 15339     | 0.285453  | 17388     | 0.169966   | 26.9754   |
| 8                                   | 960   | cg00929855 | HSPA1A      | 0.055574 | 14979     | 0.201845  | 18870     | 0.146271   | 28.1217   |
| 9                                   | 16828 | cg16778903 | BRUNOL6     | 0.035393 | 20102     | 0.173028  | 22798     | 0.137636   | 29.0094   |
| 10                                  | 3973  | cg03933322 | CSAD        | 0.085716 | 25776     | 0.253300  | 33386     | 0.167583   | 29.4834   |
| 11                                  | 26929 | cg26975609 | FASTK       | 0.033620 | 20156     | 0.191733  | 23125     | 0.158113   | 34.8556   |
| 12                                  | 22454 | cg22476295 | PDGFA       | 0.022902 | 19811     | 0.185985  | 22590     | 0.163083   | 38.4539   |
| 13                                  | 13998 | cg14037413 | ZNF143      | 0.032334 | 16879     | 0.215594  | 19228     | 0.183260   | 42.2147   |
| 14                                  | 17182 | cg17159242 | RPS7        | 0.044517 | 14299     | 0.263642  | 14799     | 0.219125   | 50.2142   |
| <b>Ctr1647 vs Ctr1647-replicate</b> |       |            |             |          |           |           |           |            |           |
| 1                                   | 1952  | cg01932459 | CD164       | 0.218240 | 34944     | 0.017508  | 28401     | -0.200732  | -50.9481  |
| 2                                   | 23810 | cg23857226 | ZNF671      | 0.282304 | 9241      | 0.063406  | 6934      | -0.218898  | -46.4760  |
| 3                                   | 1910  | cg01888566 | MEST        | 0.293734 | 25532     | 0.121331  | 20546     | -0.172403  | -27.0083  |
| 4                                   | 5205  | cg05171367 | HIP1        | 0.212748 | 40690     | 0.069149  | 34246     | -0.143599  | -25.7044  |
| 5                                   | 26913 | cg26952662 | CTHRC1      | 0.196564 | 21725     | 0.070179  | 15845     | -0.126385  | -21.6008  |
| 6                                   | 26567 | cg26609631 | GSH1        | 0.188772 | 20348     | 0.068315  | 15109     | -0.120457  | -20.4627  |
| 7                                   | 5702  | cg05702737 | WNT10A      | 0.054651 | 23541     | 0.167797  | 25413     | 0.113146   | 20.2608   |
| 8                                   | 71    | cg00061059 | GPSN2       | 0.090097 | 2697      | 0.220000  | 2350      | 0.129904   | 20.4671   |
| 9                                   | 6709  | cg06719391 | KCNQ1       | 0.052526 | 15797     | 0.202509  | 15203     | 0.149984   | 29.5015   |
| 10                                  | 4417  | cg04391111 | TP73        | 0.050403 | 16268     | 0.205881  | 17755     | 0.155478   | 31.2408   |
| 11                                  | 20705 | cg20760063 | NBR2        | 0.187987 | 7342      | 0.408226  | 9042      | 0.220239   | 33.1220   |
| 12                                  | 6262  | cg06290168 | C12orf24    | 0.038348 | 15546     | 0.197144  | 18105     | 0.158795   | 34.1608   |
| 13                                  | 17149 | cg17120423 | CIRH1A      | 0.033150 | 20775     | 0.207906  | 21453     | 0.174756   | 39.6065   |
| 14                                  | 15092 | cg15094912 | POFUT2      | 0.049543 | 16633     | 0.243499  | 21050     | 0.193956   | 41.8362   |
| 15                                  | 6674  | cg06677140 | MSX1        | 0.055828 | 17454     | 0.280643  | 18379     | 0.224815   | 49.6417   |

Table S2

List of 914 Illumina Infinium27 array probes which have shown statistically significant ( $p < 0.01$ ) differences in AvgBeta values between “Institutionalized” and “Comparison” groups of children. CpG sites located on sex chromosomes are excluded.

| N  | TargetID   | Gene Symbol | Chromosome | AvgBeta                 |                  | Delta Beta | DiffScore |
|----|------------|-------------|------------|-------------------------|------------------|------------|-----------|
|    |            |             |            | Institutionalized group | Comparison group |            |           |
| 1  | cg00079056 | SPINK4      | 9          | 0.8510                  | 0.8099           | 0.0411     | 31.2980   |
| 2  | cg00132141 | CTNNA3      | 10         | 0.7119                  | 0.6635           | 0.0484     | 24.1947   |
| 3  | cg00134539 | UBASH3A     | 21         | 0.5246                  | 0.4745           | 0.0501     | 20.4162   |
| 4  | cg00183782 | MEF2A       | 15         | 0.7516                  | 0.7058           | 0.0458     | 24.6041   |
| 5  | cg00364814 | R3HDM2      | 12         | 0.8643                  | 0.8293           | 0.0350     | 26.3560   |
| 6  | cg00393585 | FLJ31659    | 4          | 0.0909                  | 0.1375           | -0.0466    | -41.5511  |
| 7  | cg00398048 | AGA         | 4          | 0.4610                  | 0.4070           | 0.0540     | 23.2810   |
| 8  | cg00410895 | CCDC23      | 1          | 0.8692                  | 0.8373           | 0.0319     | 23.4673   |
| 9  | cg00436282 | STATH       | 4          | 0.8390                  | 0.8058           | 0.0332     | 21.0543   |
| 10 | cg00461841 | ATF7IP2     | 16         | 0.7037                  | 0.6452           | 0.0585     | 32.3215   |
| 11 | cg00519208 | EVI5        | 1          | 0.7935                  | 0.7482           | 0.0454     | 28.0503   |
| 12 | cg00539322 | SAG         | 2          | 0.7533                  | 0.7121           | 0.0411     | 20.8847   |
| 13 | cg00550617 | KRTAP9-4    | 17         | 0.6906                  | 0.6341           | 0.0565     | 29.6943   |
| 14 | cg00577167 | ALDOB       | 9          | 0.8073                  | 0.7715           | 0.0358     | 20.4210   |
| 15 | cg00579393 | REG1B       | 2          | 0.8276                  | 0.7825           | 0.0451     | 32.1559   |
| 16 | cg00594118 | COBRA1      | 9          | 0.0602                  | 0.1036           | -0.0434    | -45.7262  |
| 17 | cg00695416 | CBR1        | 21         | 0.0483                  | 0.0845           | -0.0362    | -37.8019  |
| 18 | cg00722300 | RLN3        | 19         | 0.7685                  | 0.7297           | 0.0388     | 20.0087   |
| 19 | cg00729708 | LASS3       | 15         | 0.6289                  | 0.5619           | 0.0669     | 35.5552   |
| 20 | cg00745735 | FLJ14437    | 10         | 0.7799                  | 0.7334           | 0.0465     | 27.6912   |
| 21 | cg00763889 | HRASLS2     | 11         | 0.8483                  | 0.8136           | 0.0347     | 23.7251   |
| 22 | cg00911873 | PRPS1L1     | 7          | 0.8213                  | 0.7760           | 0.0453     | 31.4848   |
| 23 | cg00933411 | DLC1        | 8          | 0.4844                  | 0.4113           | 0.0731     | 38.7742   |
| 24 | cg00949554 | UBE2E3      | 2          | 0.1603                  | 0.1226           | 0.0377     | 24.8916   |
| 25 | cg01035238 | TNFAIP6     | 2          | 0.8435                  | 0.8089           | 0.0346     | 22.9708   |
| 26 | cg01120761 | CLEC4C      | 12         | 0.8019                  | 0.7480           | 0.0539     | 38.3011   |
| 27 | cg01216369 | SPATA16     | 3          | 0.9097                  | 0.8793           | 0.0304     | 29.2581   |
| 28 | cg01243790 | FLJ30294    | 2          | 0.8395                  | 0.7950           | 0.0445     | 33.4557   |
| 29 | cg01269048 | KIAA1244    | 6          | 0.7714                  | 0.7314           | 0.0401     | 21.2490   |
| 30 | cg01309152 | PCP4        | 21         | 0.8164                  | 0.7799           | 0.0365     | 21.8958   |
| 31 | cg01320507 | SPHAR       | 1          | 0.7455                  | 0.7021           | 0.0434     | 22.2249   |
| 32 | cg01324261 | SCRG1       | 4          | 0.8374                  | 0.8051           | 0.0323     | 20.0024   |
| 33 | cg01416012 | BAZ2B       | 2          | 0.7580                  | 0.7126           | 0.0454     | 24.7595   |
| 34 | cg01517033 | WFDC3       | 20         | 0.7696                  | 0.7284           | 0.0412     | 22.0430   |

|    |            |           |    |        |        |         |          |
|----|------------|-----------|----|--------|--------|---------|----------|
| 35 | cg01521624 | SLC13A3   | 20 | 0.8563 | 0.8237 | 0.0325  | 22.4233  |
| 36 | cg01541443 | Ells1     | 7  | 0.8715 | 0.8394 | 0.0321  | 24.0986  |
| 37 | cg01546046 | AP4S1     | 14 | 0.3942 | 0.3403 | 0.0539  | 24.4328  |
| 38 | cg01549015 | IFNA10    | 9  | 0.8131 | 0.7643 | 0.0488  | 34.2325  |
| 39 | cg01605517 | AHCTF1    | 1  | 0.8318 | 0.7875 | 0.0443  | 31.9612  |
| 40 | cg01623187 | FAM112A   | 20 | 0.8096 | 0.7696 | 0.0400  | 24.4927  |
| 41 | cg01637734 | CD5L      | 1  | 0.8030 | 0.7606 | 0.0425  | 26.2297  |
| 42 | cg01714932 | PZP       | 12 | 0.8346 | 0.8003 | 0.0344  | 21.7153  |
| 43 | cg01727899 | GPATC2    | 1  | 0.6407 | 0.5867 | 0.0539  | 25.2274  |
| 44 | cg01747191 | C6orf182  | 6  | 0.8833 | 0.8542 | 0.0291  | 22.4322  |
| 45 | cg01804844 | SDCCAG33  | 18 | 0.8393 | 0.8027 | 0.0366  | 24.5455  |
| 46 | cg01843018 | C5        | 9  | 0.8111 | 0.7761 | 0.0350  | 20.0423  |
| 47 | cg01871995 | FGL1      | 8  | 0.7591 | 0.7108 | 0.0483  | 27.4907  |
| 48 | cg01888566 | MEST      | 7  | 0.1561 | 0.1142 | 0.0419  | 30.7158  |
| 49 | cg01894895 | ANXA1     | 9  | 0.8723 | 0.8421 | 0.0302  | 22.0167  |
| 50 | cg01939443 | RGSL1     | 1  | 0.7934 | 0.7492 | 0.0443  | 26.9770  |
| 51 | cg02019333 | UPK1B     | 3  | 0.6915 | 0.6441 | 0.0474  | 22.3910  |
| 52 | cg02039053 | ADH1A     | 4  | 0.6861 | 0.6399 | 0.0462  | 21.2076  |
| 53 | cg02046532 | DEFB129   | 20 | 0.7855 | 0.7422 | 0.0433  | 25.2077  |
| 54 | cg02082342 | VSIG2     | 11 | 0.7679 | 0.7177 | 0.0502  | 30.0248  |
| 55 | cg02123547 | PIM1      | 6  | 0.0664 | 0.1038 | -0.0375 | -34.6446 |
| 56 | cg02218214 | ANGPTL3   | 1  | 0.7813 | 0.7297 | 0.0516  | 32.8788  |
| 57 | cg02241259 | IL23R     | 1  | 0.8237 | 0.7842 | 0.0395  | 25.6025  |
| 58 | cg02248486 | HOXA5     | 7  | 0.8169 | 0.7685 | 0.0484  | 34.2544  |
| 59 | cg02255732 | FLJ46154  | 11 | 0.7145 | 0.6656 | 0.0489  | 24.7679  |
| 60 | cg02288165 | SN        | 20 | 0.7464 | 0.6264 | 0.1200  | 122.5701 |
| 61 | cg02382666 | CALD1     | 7  | 0.8555 | 0.8176 | 0.0379  | 28.3099  |
| 62 | cg02475653 | KIAA0703  | 16 | 0.7854 | 0.7303 | 0.0552  | 37.2639  |
| 63 | cg02552945 | C5        | 9  | 0.8219 | 0.7670 | 0.0549  | 43.0397  |
| 64 | cg02620013 | MLNR      | 13 | 0.1939 | 0.2346 | -0.0408 | -21.1623 |
| 65 | cg02624129 | SNX19     | 11 | 0.1989 | 0.1482 | 0.0507  | 35.4753  |
| 66 | cg02629312 | C7orf9    | 7  | 0.8967 | 0.8644 | 0.0323  | 28.9736  |
| 67 | cg02655623 | HSA277841 | 17 | 0.7419 | 0.6930 | 0.0490  | 26.6378  |
| 68 | cg02710161 | TFDP2     | 3  | 0.7945 | 0.7431 | 0.0513  | 34.3293  |
| 69 | cg02741177 | PROL1     | 4  | 0.7454 | 0.6847 | 0.0607  | 38.2190  |
| 70 | cg02774963 | KEL       | 7  | 0.8764 | 0.8468 | 0.0297  | 22.0142  |
| 71 | cg02776251 | USP15     | 12 | 0.0832 | 0.1158 | -0.0326 | -24.7730 |
| 72 | cg02800334 | ANXA13    | 8  | 0.7306 | 0.6840 | 0.0466  | 23.8716  |
| 73 | cg02807450 | MTMR2     | 11 | 0.0910 | 0.1219 | -0.0309 | -21.7574 |
| 74 | cg02833180 | PLCL1     | 2  | 0.8563 | 0.8165 | 0.0398  | 30.7591  |
| 75 | cg02880679 | MBTD1     | 17 | 0.8324 | 0.7976 | 0.0348  | 21.8880  |

|     |            |           |    |        |        |         |          |
|-----|------------|-----------|----|--------|--------|---------|----------|
| 76  | cg02906939 | HNMT      | 2  | 0.9204 | 0.8968 | 0.0236  | 21.8466  |
| 77  | cg02912041 | UNQ846    | 3  | 0.8035 | 0.7409 | 0.0626  | 49.1744  |
| 78  | cg02936740 | TMPRSS11F | 4  | 0.7587 | 0.7080 | 0.0507  | 29.6503  |
| 79  | cg03014680 | CLEC12A   | 12 | 0.7641 | 0.7151 | 0.0490  | 28.5289  |
| 80  | cg03017475 | TAS2R38   | 7  | 0.7136 | 0.6698 | 0.0437  | 20.6588  |
| 81  | cg03024246 | JRKL      | 11 | 0.8787 | 0.8498 | 0.0289  | 21.4403  |
| 82  | cg03032025 | CPEB4     | 5  | 0.8261 | 0.7892 | 0.0370  | 23.3378  |
| 83  | cg03075662 | PLSCR2    | 3  | 0.8414 | 0.8085 | 0.0329  | 21.0579  |
| 84  | cg03082060 | LGALS8    | 1  | 0.7116 | 0.6599 | 0.0517  | 26.8591  |
| 85  | cg03100040 | ZNF345    | 19 | 0.1664 | 0.2131 | -0.0467 | -28.9414 |
| 86  | cg03251655 | FLJ10260  | 17 | 0.3424 | 0.2875 | 0.0549  | 27.1202  |
| 87  | cg03329572 | FCRL5     | 1  | 0.8646 | 0.8310 | 0.0336  | 24.7365  |
| 88  | cg03338064 | KIF2      | 5  | 0.8235 | 0.7493 | 0.0742  | 71.1054  |
| 89  | cg03349251 | MAK       | 6  | 0.8097 | 0.7699 | 0.0398  | 24.3215  |
| 90  | cg03349935 | RASL12    | 15 | 0.9040 | 0.8706 | 0.0334  | 32.4129  |
| 91  | cg03363283 | TAS2R9    | 12 | 0.7808 | 0.7285 | 0.0522  | 33.5066  |
| 92  | cg03382346 | ZNF611    | 19 | 0.8525 | 0.8144 | 0.0381  | 28.1067  |
| 93  | cg03400060 | BHMT2     | 5  | 0.5794 | 0.5241 | 0.0553  | 24.5906  |
| 94  | cg03498559 | UGT2B4    | 4  | 0.7513 | 0.6927 | 0.0585  | 36.6326  |
| 95  | cg03520136 | UPP2      | 2  | 0.8609 | 0.8311 | 0.0298  | 20.1314  |
| 96  | cg03535648 | PMCH      | 12 | 0.8396 | 0.7896 | 0.0500  | 40.3192  |
| 97  | cg03544379 | OR7C2     | 19 | 0.7827 | 0.7412 | 0.0415  | 23.3612  |
| 98  | cg03552103 | 40796     | 2  | 0.2103 | 0.2570 | -0.0467 | -24.9431 |
| 99  | cg03605761 | RNF126    | 19 | 0.7379 | 0.6866 | 0.0513  | 28.3821  |
| 100 | cg03660451 | RECQL5    | 17 | 0.8350 | 0.8018 | 0.0331  | 20.5852  |
| 101 | cg03665785 | HS747E2A  | 22 | 0.6895 | 0.6426 | 0.0469  | 21.8911  |
| 102 | cg03704393 | ZNF169    | 9  | 0.9081 | 0.8551 | 0.0530  | 69.4859  |
| 103 | cg03714397 | SEC63D1   | 1  | 0.8298 | 0.7946 | 0.0352  | 21.9912  |
| 104 | cg03723845 | BTNL8     | 5  | 0.8932 | 0.8672 | 0.0260  | 20.2218  |
| 105 | cg03733371 | LIPH      | 3  | 0.7155 | 0.6477 | 0.0678  | 42.4365  |
| 106 | cg03743584 | PRAP1     | 10 | 0.3901 | 0.3346 | 0.0555  | 25.7853  |
| 107 | cg03752087 | CASP14    | 19 | 0.8702 | 0.8416 | 0.0287  | 20.0646  |
| 108 | cg03752885 | DAPK3     | 19 | 0.8621 | 0.8294 | 0.0327  | 23.3790  |
| 109 | cg03762535 | HAO2      | 1  | 0.7573 | 0.7144 | 0.0429  | 22.5816  |
| 110 | cg03764585 | FMOD      | 1  | 0.4504 | 0.3885 | 0.0619  | 29.4638  |
| 111 | cg03776060 | C9orf58   | 9  | 0.3000 | 0.2452 | 0.0548  | 29.4655  |
| 112 | cg03835158 | PCMTD1    | 8  | 0.9043 | 0.8755 | 0.0288  | 25.7202  |
| 113 | cg03845435 | C1orf162  | 1  | 0.8484 | 0.8166 | 0.0319  | 20.7973  |
| 114 | cg03887787 | CTSW      | 11 | 0.3465 | 0.3953 | -0.0488 | -20.6650 |
| 115 | cg03898365 | OR10A4    | 11 | 0.6544 | 0.5959 | 0.0586  | 29.4874  |
| 116 | cg03914452 | PRR8      | 7  | 0.7423 | 0.6930 | 0.0493  | 27.0178  |

|     |            |           |    |        |        |         |          |
|-----|------------|-----------|----|--------|--------|---------|----------|
| 117 | cg03952109 | C5orf21   | 5  | 0.7396 | 0.6890 | 0.0507  | 27.9615  |
| 118 | cg03964111 | LR8       | 7  | 0.2827 | 0.2391 | 0.0436  | 20.7325  |
| 119 | cg04001802 | THEDC1    | 10 | 0.7897 | 0.7426 | 0.0471  | 29.3323  |
| 120 | cg04019407 | GIP       | 17 | 0.8070 | 0.7636 | 0.0434  | 27.6238  |
| 121 | cg04039225 | SAMD7     | 3  | 0.7971 | 0.7513 | 0.0458  | 28.8717  |
| 122 | cg04058169 | BUB3      | 10 | 0.7728 | 0.7313 | 0.0416  | 22.6333  |
| 123 | cg04087608 | HSD3B2    | 1  | 0.7996 | 0.7627 | 0.0369  | 20.7123  |
| 124 | cg04143809 | FLJ39822  | 2  | 0.8583 | 0.8186 | 0.0396  | 30.8877  |
| 125 | cg04184278 | GYS2      | 12 | 0.8450 | 0.8012 | 0.0438  | 33.5982  |
| 126 | cg04201526 | CRISP1    | 6  | 0.8846 | 0.8521 | 0.0326  | 26.8581  |
| 127 | cg04223956 | NEK7      | 1  | 0.8799 | 0.8421 | 0.0379  | 32.9299  |
| 128 | cg04265576 | HOXA6     | 7  | 0.1155 | 0.0863 | 0.0292  | 20.5235  |
| 129 | cg04281204 | DCLRE1A   | 10 | 0.7578 | 0.7087 | 0.0491  | 28.0381  |
| 130 | cg04282622 | FAM71C    | 12 | 0.7401 | 0.6951 | 0.0449  | 23.1076  |
| 131 | cg04298323 | PDE6C     | 10 | 0.7434 | 0.7024 | 0.0410  | 20.2153  |
| 132 | cg04336379 | LOC389458 | 7  | 0.1689 | 0.2154 | -0.0466 | -28.5087 |
| 133 | cg04341806 | LCP1      | 13 | 0.7474 | 0.6876 | 0.0598  | 37.5057  |
| 134 | cg04353483 | CCKAR     | 4  | 0.8220 | 0.7824 | 0.0396  | 25.5313  |
| 135 | cg04439215 | KCTD4     | 13 | 0.8411 | 0.7928 | 0.0483  | 38.4625  |
| 136 | cg04485603 | CLOCK     | 4  | 0.8890 | 0.8587 | 0.0303  | 24.8009  |
| 137 | cg04513422 | LOC283487 | 13 | 0.2761 | 0.2086 | 0.0675  | 45.7852  |
| 138 | cg04527989 | PTCD2     | 5  | 0.7254 | 0.6818 | 0.0435  | 21.1445  |
| 139 | cg04545516 | SEMG1     | 20 | 0.7364 | 0.6896 | 0.0468  | 24.4298  |
| 140 | cg04570669 | APIN      | 4  | 0.7260 | 0.6656 | 0.0604  | 35.8890  |
| 141 | cg04616566 | THSD4     | 15 | 0.8763 | 0.8284 | 0.0479  | 46.7265  |
| 142 | cg04645174 | OR7A17    | 19 | 0.8459 | 0.8102 | 0.0358  | 24.5271  |
| 143 | cg04705866 | GZMK      | 5  | 0.8065 | 0.7672 | 0.0393  | 23.5743  |
| 144 | cg04739570 | PODXL2    | 3  | 0.1806 | 0.2361 | -0.0555 | -36.2992 |
| 145 | cg04748010 | POU6F2    | 7  | 0.8689 | 0.8205 | 0.0484  | 45.3322  |
| 146 | cg04762213 | BAT2      | 6  | 0.1085 | 0.0801 | 0.0284  | 20.4782  |
| 147 | cg04794887 | LETM1     | 4  | 0.0537 | 0.0906 | -0.0369 | -37.1882 |
| 148 | cg04891836 | TNFSF14   | 19 | 0.5077 | 0.4563 | 0.0514  | 21.2517  |
| 149 | cg04902405 | ZC3H11A   | 1  | 0.8594 | 0.8195 | 0.0399  | 31.4643  |
| 150 | cg04979933 | INSL5     | 1  | 0.8654 | 0.8353 | 0.0301  | 20.9540  |
| 151 | cg04987894 | GSTM5     | 1  | 0.2979 | 0.2472 | 0.0507  | 25.8715  |
| 152 | cg05088386 | ELF2      | 4  | 0.8395 | 0.8042 | 0.0354  | 23.2965  |
| 153 | cg05126264 | IFNB1     | 9  | 0.8971 | 0.8695 | 0.0276  | 22.8345  |
| 154 | cg05193832 | KCNJ1     | 11 | 0.8409 | 0.8037 | 0.0372  | 25.3811  |
| 155 | cg05333568 | C1orf65   | 1  | 0.4072 | 0.3457 | 0.0615  | 30.1773  |
| 156 | cg05341115 | HYAL4     | 7  | 0.7772 | 0.7363 | 0.0409  | 22.4253  |
| 157 | cg05343453 | LOC136263 | 7  | 0.8566 | 0.8254 | 0.0312  | 21.0279  |

|     |            |               |    |        |        |         |          |
|-----|------------|---------------|----|--------|--------|---------|----------|
| 158 | cg05348123 | SCRG1         | 4  | 0.8420 | 0.7992 | 0.0428  | 31.8697  |
| 159 | cg05376954 | FPR1          | 19 | 0.6738 | 0.6268 | 0.0470  | 21.3303  |
| 160 | cg05379350 | GIT1          | 17 | 0.2652 | 0.2233 | 0.0419  | 20.2544  |
| 161 | cg05389024 | KBTBD10       | 2  | 0.7387 | 0.6948 | 0.0439  | 22.1775  |
| 162 | cg05412531 | C8orf78       | 8  | 0.8712 | 0.8411 | 0.0301  | 21.7714  |
| 163 | cg05511685 | RGS9          | 17 | 0.8198 | 0.7802 | 0.0396  | 25.2759  |
| 164 | cg05520656 | ZNF681        | 19 | 0.0797 | 0.1246 | -0.0449 | -42.0685 |
| 165 | cg05564266 | C6orf204      | 6  | 0.8380 | 0.7988 | 0.0391  | 27.0489  |
| 166 | cg05585544 | C1QTNF4       | 11 | 0.8405 | 0.8084 | 0.0322  | 20.2293  |
| 167 | cg05592434 | RPS13         | 11 | 0.3402 | 0.2870 | 0.0532  | 25.7900  |
| 168 | cg05624196 | APOD          | 3  | 0.8129 | 0.7678 | 0.0452  | 30.1711  |
| 169 | cg05696092 | NOSIP         | 19 | 0.6135 | 0.5478 | 0.0657  | 33.7997  |
| 170 | cg05721199 | SAMD7         | 3  | 0.7267 | 0.6701 | 0.0566  | 32.3344  |
| 171 | cg05744229 | MYH7          | 14 | 0.7689 | 0.7274 | 0.0416  | 22.3304  |
| 172 | cg05755779 | COLEC10       | 8  | 0.8288 | 0.7937 | 0.0351  | 21.8149  |
| 173 | cg05761971 | FAM82A        | 2  | 0.7844 | 0.7385 | 0.0459  | 27.5854  |
| 174 | cg05779068 | OR2W1         | 6  | 0.8234 | 0.7785 | 0.0449  | 31.3511  |
| 175 | cg05822532 | ELN           | 7  | 0.4932 | 0.4364 | 0.0568  | 25.0993  |
| 176 | cg05824215 | CCR6          | 6  | 0.7390 | 0.6879 | 0.0511  | 28.3082  |
| 177 | cg05863612 | DNMBP         | 10 | 0.8500 | 0.8124 | 0.0376  | 27.1269  |
| 178 | cg05936800 | TNFSF18       | 1  | 0.7783 | 0.7393 | 0.0390  | 20.8509  |
| 179 | cg05960024 | CLOCK         | 4  | 0.8954 | 0.8671 | 0.0282  | 23.3033  |
| 180 | cg05965188 | KIAA0179      | 21 | 0.8081 | 0.7704 | 0.0377  | 22.2301  |
| 181 | cg05968233 | ALKBH7        | 19 | 0.3036 | 0.2594 | 0.0442  | 20.2242  |
| 182 | cg05998244 | LONRF2        | 2  | 0.7896 | 0.7484 | 0.0412  | 23.7182  |
| 183 | cg05998983 | OIT3          | 10 | 0.8043 | 0.7670 | 0.0373  | 21.5149  |
| 184 | cg06021171 | SPOCK3        | 4  | 0.6823 | 0.6343 | 0.0480  | 22.3747  |
| 185 | cg06098051 | LOC400986     | 2  | 0.8341 | 0.7959 | 0.0381  | 25.4856  |
| 186 | cg06140118 | DUS2L         | 16 | 0.0283 | 0.0500 | -0.0217 | -20.5164 |
| 187 | cg06210526 | CYP2F1        | 19 | 0.7955 | 0.8389 | -0.0434 | -32.0556 |
| 188 | cg06213598 | ABCA9         | 17 | 0.7797 | 0.7386 | 0.0411  | 22.7606  |
| 189 | cg06233985 | HBB           | 11 | 0.7804 | 0.7385 | 0.0419  | 23.5371  |
| 190 | cg06244634 | TAS2R4        | 7  | 0.8006 | 0.7621 | 0.0384  | 22.2005  |
| 191 | cg06268694 | CELSR1        | 22 | 0.0928 | 0.1240 | -0.0313 | -21.9121 |
| 192 | cg06290168 | C12orf24      | 12 | 0.0424 | 0.0768 | -0.0343 | -36.5965 |
| 193 | cg06353345 | OR51B4        | 11 | 0.7909 | 0.7437 | 0.0472  | 29.5917  |
| 194 | cg06399881 | TMPRSS11B     | 4  | 0.7881 | 0.7423 | 0.0458  | 27.8734  |
| 195 | cg06425515 | ADH7          | 4  | 0.7169 | 0.6645 | 0.0524  | 27.8279  |
| 196 | cg06479216 | IFNA16        | 9  | 0.7364 | 0.6846 | 0.0518  | 28.7310  |
| 197 | cg06488505 | DKFZp667M2411 | 17 | 0.8157 | 0.7728 | 0.0429  | 28.1322  |
| 198 | cg06496654 | TAS2R7        | 12 | 0.7885 | 0.7455 | 0.0429  | 25.1902  |



|     |            |          |    |        |        |         |          |
|-----|------------|----------|----|--------|--------|---------|----------|
| 199 | cg06545504 | HTN1     | 4  | 0.8350 | 0.7976 | 0.0374  | 24.8726  |
| 200 | cg06585893 | CAPN9    | 1  | 0.5791 | 0.5194 | 0.0597  | 27.9780  |
| 201 | cg06638451 | FAM107A  | 3  | 0.7359 | 0.6925 | 0.0434  | 21.6108  |
| 202 | cg06643227 | C9orf84  | 9  | 0.8021 | 0.8352 | -0.0330 | -20.4834 |
| 203 | cg06730286 | IFT140   | 16 | 0.8743 | 0.8424 | 0.0319  | 24.2342  |
| 204 | cg06750167 | TESC     | 12 | 0.5296 | 0.4644 | 0.0652  | 31.6848  |
| 205 | cg06757810 | CNGB3    | 8  | 0.8396 | 0.8037 | 0.0359  | 23.8294  |
| 206 | cg06790275 | PIAS1    | 15 | 0.0413 | 0.0752 | -0.0339 | -36.1786 |
| 207 | cg06798189 | SLC4A7   | 3  | 0.7602 | 0.7011 | 0.0590  | 38.1713  |
| 208 | cg06840801 | CHRN3    | 8  | 0.8496 | 0.8150 | 0.0346  | 23.7467  |
| 209 | cg06908474 | CAT      | 11 | 0.0649 | 0.0972 | -0.0323 | -27.7276 |
| 210 | cg06933072 | SAC      | 1  | 0.8773 | 0.8485 | 0.0288  | 21.1111  |
| 211 | cg07039113 | S100A9   | 1  | 0.8722 | 0.8314 | 0.0408  | 35.2250  |
| 212 | cg07044282 | ANGPTL1  | 1  | 0.7413 | 0.6978 | 0.0435  | 22.0293  |
| 213 | cg07103493 | SLC27A6  | 5  | 0.1071 | 0.0778 | 0.0293  | 21.7847  |
| 214 | cg07136161 | CYLC2    | 9  | 0.7866 | 0.7433 | 0.0433  | 25.3797  |
| 215 | cg07136254 | HFE2     | 1  | 0.8244 | 0.7844 | 0.0400  | 26.1936  |
| 216 | cg07153965 | ACRV1    | 11 | 0.8060 | 0.7687 | 0.0372  | 21.5950  |
| 217 | cg07204803 | ARL13B   | 3  | 0.7695 | 0.7292 | 0.0403  | 21.2839  |
| 218 | cg07232688 | LRRC39   | 1  | 0.7797 | 0.7418 | 0.0378  | 20.0103  |
| 219 | cg07236769 | IFNW1    | 9  | 0.7771 | 0.7263 | 0.0507  | 31.5315  |
| 220 | cg07292816 | EFCAB3   | 17 | 0.8313 | 0.7866 | 0.0446  | 32.2261  |
| 221 | cg07327347 | AQP8     | 16 | 0.7902 | 0.7249 | 0.0653  | 50.0182  |
| 222 | cg07338205 | G6PC2    | 2  | 0.8266 | 0.7904 | 0.0362  | 22.6543  |
| 223 | cg07363637 | SLC44A4  | 6  | 0.7201 | 0.6589 | 0.0613  | 36.2573  |
| 224 | cg07366967 | EXDL2    | 14 | 0.8357 | 0.8030 | 0.0327  | 20.2351  |
| 225 | cg07403350 | LIG4     | 13 | 0.5873 | 0.5183 | 0.0690  | 35.9078  |
| 226 | cg07455279 | NDUFA3   | 19 | 0.2564 | 0.3047 | -0.0483 | -23.4284 |
| 227 | cg07459489 | SLC30A8  | 8  | 0.8608 | 0.8263 | 0.0345  | 25.1417  |
| 228 | cg07465609 | EGFL11   | 6  | 0.8117 | 0.7631 | 0.0486  | 33.7636  |
| 229 | cg07472159 | COL10A1  | 6  | 0.7650 | 0.7033 | 0.0617  | 41.6942  |
| 230 | cg07476030 | RTN4IP1  | 6  | 0.8205 | 0.7817 | 0.0388  | 24.5421  |
| 231 | cg07504718 | MMP21    | 10 | 0.7480 | 0.7017 | 0.0463  | 24.8181  |
| 232 | cg07543883 | ANGPTL6  | 19 | 0.5841 | 0.5317 | 0.0525  | 22.6636  |
| 233 | cg07613278 | API5     | 11 | 0.2312 | 0.2737 | -0.0425 | -20.2768 |
| 234 | cg07689731 | SDC3     | 1  | 0.7208 | 0.6690 | 0.0518  | 27.5809  |
| 235 | cg07732644 | ASPA     | 17 | 0.7903 | 0.7495 | 0.0409  | 23.4676  |
| 236 | cg07747299 | C21orf56 | 21 | 0.3008 | 0.1766 | 0.1242  | 142.9183 |
| 237 | cg07790638 | LOC91431 | 4  | 0.8575 | 0.8191 | 0.0384  | 29.2569  |
| 238 | cg07803864 | TUBAL3   | 10 | 0.7686 | 0.7053 | 0.0633  | 44.0249  |
| 239 | cg07829809 | METAP1   | 4  | 0.7663 | 0.7117 | 0.0546  | 34.3007  |

|     |            |           |    |        |        |         |          |
|-----|------------|-----------|----|--------|--------|---------|----------|
| 240 | cg07880854 | FLJ37440  | 2  | 0.5263 | 0.4701 | 0.0562  | 24.6695  |
| 241 | cg07942995 | ZSCAN1    | 19 | 0.7444 | 0.6993 | 0.0451  | 23.5028  |
| 242 | cg07950803 | CD1A      | 1  | 0.8277 | 0.7798 | 0.0479  | 35.5054  |
| 243 | cg07974891 | ITGB1BP1  | 2  | 0.7663 | 0.7018 | 0.0645  | 45.0575  |
| 244 | cg07981495 | CGA       | 6  | 0.8655 | 0.8311 | 0.0344  | 25.7774  |
| 245 | cg07991621 | SH3BP2    | 4  | 0.2990 | 0.2231 | 0.0759  | 53.6019  |
| 246 | cg08046471 | CXCL11    | 4  | 0.8374 | 0.7920 | 0.0454  | 34.2138  |
| 247 | cg08067268 | HADHB     | 2  | 0.1753 | 0.2146 | -0.0393 | -21.2800 |
| 248 | cg08088390 | DEFB125   | 20 | 0.7052 | 0.6574 | 0.0478  | 23.3816  |
| 249 | cg08096038 | C6orf111  | 6  | 0.8453 | 0.8059 | 0.0394  | 28.4076  |
| 250 | cg08099701 | GABRA5    | 15 | 0.8215 | 0.7861 | 0.0354  | 21.3424  |
| 251 | cg08113203 | SMR3B     | 4  | 0.7904 | 0.7529 | 0.0375  | 20.4852  |
| 252 | cg08212685 | ATG10     | 5  | 0.1434 | 0.1808 | -0.0374 | -22.3428 |
| 253 | cg08284151 | DPPA3     | 12 | 0.5592 | 0.5077 | 0.0515  | 21.6531  |
| 254 | cg08375941 | GPR15     | 3  | 0.7546 | 0.7051 | 0.0494  | 28.0739  |
| 255 | cg08403419 | RLN3R2    | 1  | 0.7597 | 0.7166 | 0.0431  | 22.9224  |
| 256 | cg08404225 | IL5RA     | 3  | 0.7531 | 0.7024 | 0.0507  | 29.1475  |
| 257 | cg08409225 | OBFC2B    | 12 | 0.4104 | 0.3578 | 0.0526  | 23.0400  |
| 258 | cg08465774 | INDO      | 8  | 0.7612 | 0.7072 | 0.0540  | 33.1138  |
| 259 | cg08471713 | MEOX1     | 17 | 0.5505 | 0.6028 | -0.0523 | -22.9146 |
| 260 | cg08489623 | FLJ44060  | 7  | 0.7232 | 0.6719 | 0.0513  | 27.3008  |
| 261 | cg08507270 | TAS2R8    | 12 | 0.8244 | 0.7870 | 0.0373  | 23.5323  |
| 262 | cg08550724 | C6orf182  | 6  | 0.8650 | 0.8354 | 0.0296  | 20.3672  |
| 263 | cg08578023 | CTSS      | 1  | 0.1478 | 0.1847 | -0.0370 | -21.5364 |
| 264 | cg08585897 | TERF2IP   | 16 | 0.5080 | 0.4091 | 0.0989  | 66.4465  |
| 265 | cg08624068 | STARD6    | 18 | 0.8726 | 0.8443 | 0.0283  | 20.0251  |
| 266 | cg08631437 |           | 8  | 0.2949 | 0.2364 | 0.0584  | 33.4453  |
| 267 | cg08632701 | SETD4     | 21 | 0.7882 | 0.8298 | -0.0416 | -28.6229 |
| 268 | cg08634464 | LOC126295 | 19 | 0.2859 | 0.2400 | 0.0460  | 22.4981  |
| 269 | cg08654334 | DIRC1     | 2  | 0.6372 | 0.5798 | 0.0573  | 27.7382  |
| 270 | cg08697242 | CA14      | 1  | 0.8547 | 0.8153 | 0.0394  | 29.9631  |
| 271 | cg08728865 | NALP7     | 19 | 0.9151 | 0.8901 | 0.0250  | 22.7272  |
| 272 | cg08752459 | CLEC2B    | 12 | 0.2002 | 0.2441 | -0.0440 | -23.3900 |
| 273 | cg08822227 | SH3BP2    | 4  | 0.2399 | 0.1548 | 0.0852  | 81.3060  |
| 274 | cg08832227 | KCNA1     | 12 | 0.2296 | 0.2773 | -0.0477 | -24.4468 |
| 275 | cg08923109 | PAN3      | 13 | 0.8864 | 0.8544 | 0.0320  | 26.4753  |
| 276 | cg08983760 | EDNRB     | 13 | 0.7685 | 0.7243 | 0.0442  | 24.6000  |
| 277 | cg09034896 | GRK1      | 13 | 0.6827 | 0.7389 | -0.0562 | -33.0546 |
| 278 | cg09058542 | TSHB      | 1  | 0.8518 | 0.8118 | 0.0400  | 30.1568  |
| 279 | cg09060914 | SELP      | 1  | 0.8402 | 0.7980 | 0.0423  | 30.9443  |
| 280 | cg09087901 | PLG       | 6  | 0.7115 | 0.6620 | 0.0495  | 25.0268  |

|     |            |          |    |        |        |         |          |
|-----|------------|----------|----|--------|--------|---------|----------|
| 281 | cg09088193 | KA35     | 17 | 0.8795 | 0.8410 | 0.0385  | 33.7592  |
| 282 | cg09096031 | C2orf11  | 2  | 0.6268 | 0.5721 | 0.0548  | 25.4036  |
| 283 | cg09096383 | CSN1S1   | 4  | 0.7606 | 0.7120 | 0.0486  | 27.8441  |
| 284 | cg09111484 | FLJ90579 | 12 | 0.7975 | 0.7563 | 0.0412  | 24.4252  |
| 285 | cg09238677 | C3AR1    | 12 | 0.1590 | 0.2010 | -0.0420 | -25.0851 |
| 286 | cg09262269 | LOX      | 5  | 0.1249 | 0.0939 | 0.0310  | 21.4866  |
| 287 | cg09272256 | AKR1C4   | 10 | 0.8364 | 0.7854 | 0.0510  | 40.9107  |
| 288 | cg09277575 | AKR1D1   | 7  | 0.7466 | 0.7036 | 0.0430  | 21.9593  |
| 289 | cg09321965 | NEK7     | 1  | 0.8150 | 0.7743 | 0.0407  | 25.8552  |
| 290 | cg09360083 | THYN1    | 11 | 0.7198 | 0.6710 | 0.0488  | 24.9538  |
| 291 | cg09375488 | ASB4     | 7  | 0.7488 | 0.6966 | 0.0522  | 30.1604  |
| 292 | cg09377486 | BIRC8    | 19 | 0.8431 | 0.8001 | 0.0430  | 32.3139  |
| 293 | cg09440243 | PTPRD    | 9  | 0.8243 | 0.7867 | 0.0376  | 23.7768  |
| 294 | cg09448875 | ABCC2    | 10 | 0.8696 | 0.8357 | 0.0339  | 25.9312  |
| 295 | cg09478478 | CD1E     | 1  | 0.7948 | 0.7535 | 0.0413  | 24.2596  |
| 296 | cg09494546 | SLC16A4  | 1  | 0.8465 | 0.7994 | 0.0470  | 37.9353  |
| 297 | cg09526693 | IL2      | 4  | 0.8130 | 0.7681 | 0.0450  | 29.9616  |
| 298 | cg09532664 | TAS2R1   | 5  | 0.7612 | 0.8049 | -0.0437 | -27.6834 |
| 299 | cg09559551 | RSC1A1   | 1  | 0.8047 | 0.7511 | 0.0536  | 38.3276  |
| 300 | cg09656934 | TDRD5    | 1  | 0.3902 | 0.3412 | 0.0490  | 20.9360  |
| 301 | cg09745307 | AGXT2    | 5  | 0.6985 | 0.6534 | 0.0451  | 20.9766  |
| 302 | cg09748960 | BTNL2    | 6  | 0.7989 | 0.7492 | 0.0497  | 33.1867  |
| 303 | cg09784259 | SELE     | 1  | 0.8101 | 0.7636 | 0.0465  | 31.2314  |
| 304 | cg09816180 | GC       | 4  | 0.8336 | 0.7999 | 0.0337  | 20.9484  |
| 305 | cg09830278 | SHOC2    | 10 | 0.8132 | 0.7643 | 0.0489  | 34.2669  |
| 306 | cg09845785 | PDE1A    | 2  | 0.0831 | 0.1140 | -0.0309 | -22.8575 |
| 307 | cg09873510 | NLN      | 5  | 0.7864 | 0.7450 | 0.0414  | 23.5837  |
| 308 | cg09898548 | C20orf86 | 20 | 0.8089 | 0.7718 | 0.0370  | 21.6741  |
| 309 | cg09944526 | EXOC6    | 10 | 0.8707 | 0.8367 | 0.0340  | 26.1478  |
| 310 | cg10062803 | FABP4    | 8  | 0.7559 | 0.7032 | 0.0527  | 31.2856  |
| 311 | cg10087081 | KIAA0355 | 19 | 0.7503 | 0.6936 | 0.0568  | 34.7130  |
| 312 | cg10094277 | KERA     | 12 | 0.7812 | 0.7276 | 0.0536  | 35.0347  |
| 313 | cg10100220 | LNX2     | 13 | 0.8572 | 0.8259 | 0.0313  | 21.1884  |
| 314 | cg10130071 | GALNT1   | 18 | 0.8836 | 0.8556 | 0.0280  | 21.1659  |
| 315 | cg10198837 | CD8B1    | 2  | 0.9265 | 0.9013 | 0.0252  | 25.5446  |
| 316 | cg10237469 | CEACAM4  | 19 | 0.2181 | 0.1798 | 0.0383  | 20.1352  |
| 317 | cg10238171 | BDKRB1   | 14 | 0.7229 | 0.6778 | 0.0452  | 22.2538  |
| 318 | cg10241097 | UBL4B    | 1  | 0.8374 | 0.8008 | 0.0366  | 24.2692  |
| 319 | cg10281770 | WDR45L   | 17 | 0.6690 | 0.6078 | 0.0612  | 32.4985  |
| 320 | cg10296238 | C21orf56 | 21 | 0.4469 | 0.3128 | 0.1341  | 124.1201 |
| 321 | cg10362475 | SHANK2   | 11 | 0.3313 | 0.2808 | 0.0504  | 23.9258  |

|     |            |          |    |        |        |         |          |
|-----|------------|----------|----|--------|--------|---------|----------|
| 322 | cg10371914 | C8orf34  | 8  | 0.7016 | 0.6437 | 0.0579  | 31.6112  |
| 323 | cg10401088 | LUM      | 12 | 0.5770 | 0.5129 | 0.0641  | 31.4334  |
| 324 | cg10409680 | HLA-C    | 6  | 0.0877 | 0.0570 | 0.0308  | 27.3094  |
| 325 | cg10431340 | MPZ      | 1  | 0.7389 | 0.6956 | 0.0432  | 21.6770  |
| 326 | cg10501629 | ATP2B1   | 12 | 0.8649 | 0.8315 | 0.0334  | 24.5851  |
| 327 | cg10569616 | POT1     | 7  | 0.8047 | 0.7464 | 0.0583  | 44.0097  |
| 328 | cg10576828 | LRRC7    | 1  | 0.8423 | 0.8088 | 0.0336  | 21.7820  |
| 329 | cg10585462 | C4orf7   | 4  | 0.7714 | 0.7110 | 0.0604  | 41.1120  |
| 330 | cg10620457 | C8B      | 1  | 0.8122 | 0.7739 | 0.0383  | 23.1820  |
| 331 | cg10648908 | ARFGAP3  | 22 | 0.0668 | 0.1055 | -0.0387 | -36.3634 |
| 332 | cg10671066 | SLAMF6   | 1  | 0.1201 | 0.1527 | -0.0326 | -20.1619 |
| 333 | cg10707565 | CUBN     | 10 | 0.8253 | 0.7850 | 0.0403  | 26.6258  |
| 334 | cg10715231 | SOX30    | 5  | 0.9217 | 0.8989 | 0.0228  | 21.0251  |
| 335 | cg10732834 | KIAA1632 | 18 | 0.8148 | 0.7798 | 0.0350  | 20.4146  |
| 336 | cg10746737 | HLA-DRB5 | 6  | 0.8349 | 0.8005 | 0.0344  | 21.8256  |
| 337 | cg10753073 | UBE2U    | 1  | 0.8835 | 0.8530 | 0.0305  | 24.1477  |
| 338 | cg10756887 | C22orf15 | 22 | 0.1249 | 0.0890 | 0.0360  | 27.7755  |
| 339 | cg10771262 | TCF21    | 6  | 0.3118 | 0.2653 | 0.0466  | 21.6993  |
| 340 | cg10835876 | DPT      | 1  | 0.8215 | 0.7842 | 0.0374  | 23.2581  |
| 341 | cg10846410 | HSPA2    | 14 | 0.7636 | 0.7179 | 0.0457  | 25.4782  |
| 342 | cg10851775 | SLC26A7  | 8  | 0.7768 | 0.7232 | 0.0536  | 34.4891  |
| 343 | cg10874403 | POU1F1   | 3  | 0.7549 | 0.7056 | 0.0493  | 28.0066  |
| 344 | cg10878998 | CYB5A    | 18 | 0.2482 | 0.1966 | 0.0517  | 30.6042  |
| 345 | cg10920765 | HBG2     | 11 | 0.7429 | 0.6932 | 0.0497  | 27.3783  |
| 346 | cg10978346 | INPP4B   | 4  | 0.6915 | 0.6375 | 0.0540  | 27.5954  |
| 347 | cg10985320 | JRKL     | 11 | 0.8852 | 0.8542 | 0.0311  | 25.0642  |
| 348 | cg10997248 | FXVD2    | 11 | 0.6439 | 0.5959 | 0.0480  | 21.0047  |
| 349 | cg11059341 | MYL1     | 2  | 0.8101 | 0.7701 | 0.0400  | 24.5629  |
| 350 | cg11074362 | DENND4C  | 9  | 0.7446 | 0.6991 | 0.0455  | 23.8918  |
| 351 | cg11077161 | SIPA1L1  | 14 | 0.7767 | 0.7238 | 0.0529  | 33.7030  |
| 352 | cg11108890 | VAMP5    | 2  | 0.2596 | 0.1891 | 0.0705  | 52.3567  |
| 353 | cg11119884 | SEC63D1  | 1  | 0.7136 | 0.6707 | 0.0430  | 20.1121  |
| 354 | cg11126313 | CCR3     | 3  | 0.8307 | 0.7940 | 0.0367  | 23.5850  |
| 355 | cg11152574 | ACSL5    | 10 | 0.8342 | 0.7983 | 0.0359  | 23.1645  |
| 356 | cg11166999 | HBII-436 | 15 | 0.8216 | 0.7790 | 0.0425  | 28.5142  |
| 357 | cg11178136 | KIAA0652 | 11 | 0.8634 | 0.8287 | 0.0347  | 25.8042  |
| 358 | cg11207564 | CCL3L3   | 17 | 0.2630 | 0.2062 | 0.0568  | 34.6913  |
| 359 | cg11231018 | LIPF     | 10 | 0.8534 | 0.8200 | 0.0333  | 22.8928  |
| 360 | cg11235426 | DUSP22   | 6  | 0.4737 | 0.3947 | 0.0790  | 44.6680  |
| 361 | cg11237738 | C4orf6   | 4  | 0.8072 | 0.7696 | 0.0376  | 22.0038  |
| 362 | cg11251498 | INDOL1   | 8  | 0.5229 | 0.4700 | 0.0529  | 22.3126  |

|     |            |           |    |        |        |         |          |
|-----|------------|-----------|----|--------|--------|---------|----------|
| 363 | cg11295113 | FOLR2     | 11 | 0.8056 | 0.7589 | 0.0467  | 30.8679  |
| 364 | cg11308639 | BMP10     | 2  | 0.7915 | 0.7544 | 0.0371  | 20.2769  |
| 365 | cg11376198 | AFAR3     | 1  | 0.1890 | 0.2378 | -0.0488 | -28.6306 |
| 366 | cg11378052 | MGC48595  | 14 | 0.7812 | 0.7386 | 0.0426  | 24.2305  |
| 367 | cg11386709 | EPB41L2   | 6  | 0.8530 | 0.8106 | 0.0424  | 33.3089  |
| 368 | cg11391732 | HSPB3     | 5  | 0.8961 | 0.8657 | 0.0305  | 26.3585  |
| 369 | cg11479877 | B3GALT5   | 21 | 0.8181 | 0.7766 | 0.0415  | 26.9470  |
| 370 | cg11504646 | RTP1      | 3  | 0.8400 | 0.8050 | 0.0349  | 22.8883  |
| 371 | cg11554605 | ASB4      | 7  | 0.8868 | 0.8562 | 0.0306  | 24.7922  |
| 372 | cg11649846 | LOC346673 | 7  | 0.8396 | 0.8001 | 0.0394  | 27.6159  |
| 373 | cg11680741 | MYH8      | 17 | 0.6621 | 0.6135 | 0.0486  | 22.0207  |
| 374 | cg11698653 | ASB5      | 4  | 0.7143 | 0.6674 | 0.0469  | 23.1136  |
| 375 | cg11726593 | IMPA1     | 8  | 0.3393 | 0.2926 | 0.0467  | 20.7186  |
| 376 | cg11793332 | ELF1      | 13 | 0.1126 | 0.1490 | -0.0364 | -24.8346 |
| 377 | cg11799561 | SMR3A     | 4  | 0.7527 | 0.7109 | 0.0418  | 21.3859  |
| 378 | cg11879188 | ABO       | 9  | 0.8799 | 0.8482 | 0.0317  | 24.9081  |
| 379 | cg11884699 | OR2A4     | 6  | 0.8106 | 0.7583 | 0.0523  | 37.8227  |
| 380 | cg12010995 | CYP7A1    | 8  | 0.7158 | 0.6633 | 0.0525  | 27.8260  |
| 381 | cg12014368 | MRAP      | 21 | 0.7132 | 0.6634 | 0.0498  | 25.3961  |
| 382 | cg12024906 | HKR1      | 19 | 0.2023 | 0.2424 | -0.0402 | -20.1512 |
| 383 | cg12032049 | LPO       | 17 | 0.8276 | 0.7921 | 0.0355  | 22.0779  |
| 384 | cg12044689 | HIATL1    | 9  | 0.9248 | 0.9022 | 0.0226  | 21.3301  |
| 385 | cg12058490 | A2M       | 12 | 0.8202 | 0.7722 | 0.0480  | 34.3760  |
| 386 | cg12064929 | MGC16186  | 10 | 0.7724 | 0.7330 | 0.0395  | 20.8556  |
| 387 | cg12067287 | MYOM1     | 18 | 0.8909 | 0.8646 | 0.0263  | 20.2598  |
| 388 | cg12095491 | CAST      | 5  | 0.8510 | 0.8187 | 0.0323  | 21.5385  |
| 389 | cg12108912 | MGC10993  | 2  | 0.7915 | 0.7526 | 0.0389  | 21.7836  |
| 390 | cg12128839 | HOXA5     | 7  | 0.6850 | 0.6218 | 0.0631  | 35.2341  |
| 391 | cg12182525 | ASB5      | 4  | 0.8788 | 0.8506 | 0.0282  | 20.6840  |
| 392 | cg12218747 | SETD4     | 21 | 0.6911 | 0.7355 | -0.0443 | -22.3373 |
| 393 | cg12255284 | C8orf45   | 8  | 0.7246 | 0.6783 | 0.0463  | 23.2244  |
| 394 | cg12274567 | SH2D1B    | 1  | 0.8697 | 0.8397 | 0.0300  | 21.4237  |
| 395 | cg12286890 | XCL2      | 1  | 0.8331 | 0.7882 | 0.0449  | 32.8255  |
| 396 | cg12331980 | FLJ39502  | 2  | 0.8092 | 0.7631 | 0.0461  | 30.7030  |
| 397 | cg12348970 | SLC24A2   | 9  | 0.8865 | 0.8567 | 0.0298  | 23.6737  |
| 398 | cg12368241 | PHF3      | 6  | 0.8386 | 0.8019 | 0.0367  | 24.5347  |
| 399 | cg12380854 | LRRC46    | 17 | 0.7557 | 0.7122 | 0.0435  | 22.9767  |
| 400 | cg12387247 | FCER2     | 19 | 0.6555 | 0.6054 | 0.0501  | 22.8922  |
| 401 | cg12397274 | TINAG     | 6  | 0.7705 | 0.7296 | 0.0409  | 21.8901  |
| 402 | cg12428447 | SLC22A6   | 11 | 0.8035 | 0.7641 | 0.0394  | 23.3363  |
| 403 | cg12437481 | MRPL28    | 16 | 0.6889 | 0.6154 | 0.0735  | 45.8577  |

|     |            |          |    |        |        |         |          |
|-----|------------|----------|----|--------|--------|---------|----------|
| 404 | cg12491710 | LIM2     | 19 | 0.9242 | 0.8976 | 0.0266  | 27.2156  |
| 405 | cg12542281 | PFAAP5   | 13 | 0.0839 | 0.1152 | -0.0313 | -23.2213 |
| 406 | cg12610070 | TSPAN15  | 10 | 0.1925 | 0.2323 | -0.0398 | -20.4911 |
| 407 | cg12611860 | PIK3C2A  | 11 | 0.7750 | 0.7275 | 0.0475  | 28.2057  |
| 408 | cg12626411 | PRG4     | 1  | 0.7053 | 0.6509 | 0.0544  | 28.8280  |
| 409 | cg12647320 | POGZ     | 1  | 0.8685 | 0.8360 | 0.0325  | 24.1239  |
| 410 | cg12658552 | SFRS2IP  | 12 | 0.8472 | 0.7968 | 0.0504  | 42.5559  |
| 411 | cg12671744 | FAAH     | 1  | 0.6130 | 0.5649 | 0.0482  | 20.3000  |
| 412 | cg12694555 | KBTBD10  | 2  | 0.8464 | 0.8032 | 0.0432  | 33.0526  |
| 413 | cg12775613 | HTR1F    | 3  | 0.8619 | 0.8313 | 0.0306  | 21.0431  |
| 414 | cg12791554 | TAS2R49  | 12 | 0.8501 | 0.8133 | 0.0367  | 26.1367  |
| 415 | cg12856392 | ZNF588   | 7  | 0.6305 | 0.5814 | 0.0491  | 21.3526  |
| 416 | cg12864235 | CDH9     | 5  | 0.6295 | 0.6765 | -0.0471 | -21.4715 |
| 417 | cg12879425 | BRDG1    | 4  | 0.0838 | 0.1173 | -0.0335 | -25.7409 |
| 418 | cg12952132 | NCR1     | 19 | 0.7406 | 0.6925 | 0.0480  | 25.7326  |
| 419 | cg12958813 | ATP6V1G3 | 1  | 0.8320 | 0.7884 | 0.0435  | 31.0890  |
| 420 | cg12966875 | SLPI     | 20 | 0.2543 | 0.2076 | 0.0467  | 25.1674  |
| 421 | cg12969407 | NCOA7    | 6  | 0.1001 | 0.1332 | -0.0332 | -23.0117 |
| 422 | cg13002506 | GDPD4    | 11 | 0.8778 | 0.8444 | 0.0334  | 26.6551  |
| 423 | cg13007988 | MLL2     | 12 | 0.7778 | 0.7371 | 0.0407  | 22.3125  |
| 424 | cg13041032 | MMP13    | 11 | 0.8756 | 0.8381 | 0.0375  | 31.4464  |
| 425 | cg13044277 | NRG4     | 15 | 0.1677 | 0.2113 | -0.0436 | -25.8109 |
| 426 | cg13055278 | ID2      | 2  | 0.2744 | 0.2207 | 0.0538  | 30.4142  |
| 427 | cg13059335 | ADAMDEC1 | 8  | 0.7869 | 0.7434 | 0.0435  | 25.5721  |
| 428 | cg13077930 | ALB      | 4  | 0.7448 | 0.6912 | 0.0535  | 31.0270  |
| 429 | cg13086586 | PPAT     | 4  | 0.3602 | 0.4160 | -0.0559 | -25.3708 |
| 430 | cg13109289 | C1GALT1  | 7  | 0.8336 | 0.7989 | 0.0347  | 21.9694  |
| 431 | cg13119609 | APOC2    | 19 | 0.6725 | 0.6150 | 0.0575  | 29.5036  |
| 432 | cg13120814 | FLJ11000 | 7  | 0.0948 | 0.1299 | -0.0351 | -25.8836 |
| 433 | cg13131015 | GUCY2C   | 12 | 0.7928 | 0.7551 | 0.0377  | 20.8907  |
| 434 | cg13140740 | ARL4     | 7  | 0.2585 | 0.2027 | 0.0558  | 34.0517  |
| 435 | cg13149996 | EIF4G3   | 1  | 0.8343 | 0.7869 | 0.0474  | 35.9715  |
| 436 | cg13168374 | CPLX4    | 18 | 0.8702 | 0.8370 | 0.0333  | 25.2490  |
| 437 | cg13217373 | RPS6KA2  | 6  | 0.7478 | 0.7057 | 0.0421  | 21.3251  |
| 438 | cg13235447 | IFNA2    | 9  | 0.1717 | 0.2180 | -0.0463 | -27.8874 |
| 439 | cg13281868 | C6orf142 | 6  | 0.8579 | 0.8232 | 0.0346  | 24.9306  |
| 440 | cg13302154 | MGP      | 12 | 0.5812 | 0.5305 | 0.0508  | 21.4528  |
| 441 | cg13328485 | ZNF650   | 2  | 0.7458 | 0.6912 | 0.0546  | 32.1260  |
| 442 | cg13334990 | ENO2     | 12 | 0.2416 | 0.1914 | 0.0502  | 29.6687  |
| 443 | cg13406768 | C2orf33  | 2  | 0.8462 | 0.8081 | 0.0381  | 27.0973  |
| 444 | cg13410437 | OR5P2    | 11 | 0.8986 | 0.8709 | 0.0276  | 23.1309  |

|     |            |           |    |        |        |         |          |
|-----|------------|-----------|----|--------|--------|---------|----------|
| 445 | cg13435792 | C12orf46  | 12 | 0.7034 | 0.6573 | 0.0461  | 21.9535  |
| 446 | cg13436996 | UGT2B11   | 4  | 0.7994 | 0.7500 | 0.0494  | 32.9490  |
| 447 | cg13442811 | KIAA1128  | 10 | 0.6608 | 0.5926 | 0.0682  | 38.3711  |
| 448 | cg13445249 | DSG4      | 18 | 0.7247 | 0.6817 | 0.0430  | 20.7103  |
| 449 | cg13459560 | CSN3      | 4  | 0.7775 | 0.7128 | 0.0646  | 46.9975  |
| 450 | cg13463167 | FLJ20054  | 1  | 0.8259 | 0.7851 | 0.0408  | 27.2375  |
| 451 | cg13496066 | CHST5     | 16 | 0.8288 | 0.7937 | 0.0351  | 21.7873  |
| 452 | cg13507429 | KLHDC7A   | 1  | 0.6950 | 0.7385 | -0.0434 | -21.8142 |
| 453 | cg13523386 | AMBN      | 4  | 0.8360 | 0.7948 | 0.0412  | 29.0696  |
| 454 | cg13580728 | OGN       | 9  | 0.7731 | 0.7303 | 0.0428  | 23.7120  |
| 455 | cg13629753 | GBP2      | 1  | 0.1240 | 0.1622 | -0.0382 | -25.2280 |
| 456 | cg13673094 | PTPRC     | 1  | 0.1347 | 0.1736 | -0.0389 | -24.7195 |
| 457 | cg13703941 | AKAP7     | 6  | 0.7983 | 0.7539 | 0.0444  | 27.6211  |
| 458 | cg13759778 | OMG       | 17 | 0.8174 | 0.7745 | 0.0429  | 28.3392  |
| 459 | cg13771579 | TCL1B     | 14 | 0.7677 | 0.8429 | -0.0752 | -79.8951 |
| 460 | cg13817266 | HSPA6     | 1  | 0.4389 | 0.3800 | 0.0589  | 27.2676  |
| 461 | cg13943564 | SERPINB2  | 18 | 0.7594 | 0.7112 | 0.0482  | 27.3514  |
| 462 | cg13968390 | SULT1C1   | 2  | 0.8111 | 0.6813 | 0.1298  | 374.3439 |
| 463 | cg13980719 | TNP1      | 2  | 0.6995 | 0.6426 | 0.0568  | 30.5341  |
| 464 | cg13980834 | C1orf201  | 1  | 0.8552 | 0.8222 | 0.0331  | 22.8288  |
| 465 | cg13986618 | M160      | 12 | 0.7991 | 0.7496 | 0.0495  | 32.9875  |
| 466 | cg13995453 | KLRB1     | 12 | 0.7892 | 0.7406 | 0.0487  | 30.8575  |
| 467 | cg14009688 | CALD1     | 7  | 0.5673 | 0.5093 | 0.0580  | 26.4211  |
| 468 | cg14069619 | LOC124751 | 17 | 0.8330 | 0.7994 | 0.0336  | 20.8096  |
| 469 | cg14088161 | ACTL6B    | 7  | 0.7321 | 0.6888 | 0.0434  | 21.3689  |
| 470 | cg14119236 | FGF23     | 12 | 0.4457 | 0.3839 | 0.0618  | 29.4957  |
| 471 | cg14143055 | ADAMDEC1  | 8  | 0.7779 | 0.7327 | 0.0452  | 26.3365  |
| 472 | cg14154330 | ARHGAP27  | 17 | 0.6114 | 0.5560 | 0.0554  | 25.4201  |
| 473 | cg14159672 | FLJ32569  | 1  | 0.4624 | 0.3377 | 0.1247  | 105.8125 |
| 474 | cg14191109 | SLC25A16  | 10 | 0.0553 | 0.0841 | -0.0288 | -25.0516 |
| 475 | cg14209870 | TAS2R5    | 7  | 0.9092 | 0.8690 | 0.0401  | 45.1121  |
| 476 | cg14252059 | TECTA     | 11 | 0.8230 | 0.7871 | 0.0359  | 21.9630  |
| 477 | cg14260643 | CYP3A5    | 7  | 0.5340 | 0.4775 | 0.0565  | 24.9681  |
| 478 | cg14301635 | C2        | 6  | 0.7879 | 0.7403 | 0.0476  | 29.5913  |
| 479 | cg14332079 | CDCA2     | 8  | 0.0872 | 0.0368 | 0.0504  | 70.3938  |
| 480 | cg14367014 | ALS2CR14  | 2  | 0.7482 | 0.7000 | 0.0482  | 26.4195  |
| 481 | cg14371329 | GNAL      | 18 | 0.8719 | 0.8356 | 0.0362  | 29.1360  |
| 482 | cg14379865 | GRM5      | 11 | 0.8715 | 0.8339 | 0.0376  | 30.7758  |
| 483 | cg14401592 | ACCN5     | 4  | 0.7529 | 0.7082 | 0.0447  | 23.7642  |
| 484 | cg14444244 | FLJ13096  | 2  | 0.8435 | 0.8073 | 0.0362  | 24.6711  |
| 485 | cg14458615 | IGSF11    | 3  | 0.8243 | 0.7855 | 0.0388  | 24.9810  |

|     |            |           |    |        |        |         |          |
|-----|------------|-----------|----|--------|--------|---------|----------|
| 486 | cg14462830 | TRDN      | 6  | 0.7736 | 0.7283 | 0.0453  | 25.9639  |
| 487 | cg14469290 | ALAD      | 9  | 0.8502 | 0.8186 | 0.0316  | 20.7269  |
| 488 | cg14613546 | BNC2      | 9  | 0.8036 | 0.7674 | 0.0361  | 20.3949  |
| 489 | cg14662172 | CPB2      | 13 | 0.7990 | 0.7577 | 0.0413  | 24.6516  |
| 490 | cg14758526 | CASP5     | 11 | 0.8494 | 0.8041 | 0.0454  | 36.4074  |
| 491 | cg14787704 | SFRS12    | 5  | 0.7939 | 0.7360 | 0.0579  | 41.5949  |
| 492 | cg14826456 | ADRB1     | 10 | 0.1913 | 0.2380 | -0.0467 | -26.4618 |
| 493 | cg14834436 | MNAT1     | 14 | 0.1087 | 0.1504 | -0.0417 | -31.3779 |
| 494 | cg14837082 | HRH1      | 3  | 0.7946 | 0.7516 | 0.0430  | 25.8249  |
| 495 | cg14893161 | FLJ32569  | 1  | 0.5550 | 0.4508 | 0.1043  | 73.3691  |
| 496 | cg14898892 | SHRM      | 4  | 0.8162 | 0.7764 | 0.0398  | 25.0290  |
| 497 | cg14917512 | GNA11     | 19 | 0.1811 | 0.2238 | -0.0427 | -23.7439 |
| 498 | cg14932684 | YAF2      | 12 | 0.0350 | 0.0582 | -0.0232 | -21.3687 |
| 499 | cg15133917 | TTN       | 2  | 0.7732 | 0.7339 | 0.0394  | 20.8159  |
| 500 | cg15201291 | CYP2C8    | 10 | 0.8648 | 0.8101 | 0.0547  | 53.7574  |
| 501 | cg15264273 | ZNF169    | 9  | 0.8615 | 0.8260 | 0.0354  | 26.3940  |
| 502 | cg15298545 | LOC81691  | 16 | 0.7916 | 0.7502 | 0.0413  | 24.0222  |
| 503 | cg15307449 | HSA277841 | 17 | 0.7374 | 0.6807 | 0.0567  | 33.3873  |
| 504 | cg15308737 | ARSG      | 17 | 0.8832 | 0.8546 | 0.0287  | 21.8427  |
| 505 | cg15309578 | PELI1     | 2  | 0.7159 | 0.6626 | 0.0533  | 28.5463  |
| 506 | cg15310162 | CLDN14    | 21 | 0.8396 | 0.8066 | 0.0330  | 20.9730  |
| 507 | cg15312323 | KRTAP4-4  | 17 | 0.6054 | 0.5463 | 0.0592  | 28.1538  |
| 508 | cg15329866 | PLD1      | 3  | 0.8438 | 0.8100 | 0.0338  | 22.2208  |
| 509 | cg15364618 | CIDEB     | 14 | 0.3625 | 0.3026 | 0.0599  | 30.5160  |
| 510 | cg15383120 | DUSP22    | 6  | 0.5634 | 0.5120 | 0.0514  | 21.6124  |
| 511 | cg15398520 | LPAL2     | 6  | 0.8306 | 0.7894 | 0.0412  | 28.3379  |
| 512 | cg15403517 | SRD5A2    | 2  | 0.2918 | 0.3457 | -0.0539 | -26.1203 |
| 513 | cg15408407 | RPS15     | 19 | 0.0295 | 0.0572 | -0.0277 | -29.5891 |
| 514 | cg15417244 | PDZRN4    | 12 | 0.8747 | 0.8431 | 0.0316  | 23.9792  |
| 515 | cg15489422 | TMCC1     | 3  | 0.8042 | 0.7470 | 0.0572  | 42.5184  |
| 516 | cg15527554 | YSK4      | 2  | 0.8118 | 0.7693 | 0.0425  | 27.2040  |
| 517 | cg15543551 | FGF12     | 3  | 0.2342 | 0.1782 | 0.0559  | 37.0476  |
| 518 | cg15559700 | UGT1A9    | 2  | 0.8175 | 0.7829 | 0.0346  | 20.2714  |
| 519 | cg15583072 | IAPP      | 12 | 0.7383 | 0.6915 | 0.0468  | 24.5629  |
| 520 | cg15610233 | ADAM7     | 8  | 0.8111 | 0.7724 | 0.0387  | 23.3960  |
| 521 | cg15612847 | MRPL30    | 2  | 0.8511 | 0.8203 | 0.0308  | 20.0069  |
| 522 | cg15661409 | C14orf105 | 14 | 0.8412 | 0.8048 | 0.0364  | 24.5569  |
| 523 | cg15684563 | TSPAN8    | 12 | 0.7758 | 0.7248 | 0.0510  | 31.7105  |
| 524 | cg15691649 | SLC17A3   | 6  | 0.8097 | 0.7425 | 0.0672  | 56.7653  |
| 525 | cg15722679 | SIRPB2    | 20 | 0.1565 | 0.1947 | -0.0382 | -21.8703 |
| 526 | cg15740508 | AMPD1     | 1  | 0.8178 | 0.7735 | 0.0443  | 29.8804  |



|     |            |          |    |        |        |         |          |
|-----|------------|----------|----|--------|--------|---------|----------|
| 527 | cg15741583 | HPX      | 11 | 0.6461 | 0.5887 | 0.0574  | 28.1583  |
| 528 | cg15761405 | FCRL2    | 1  | 0.7667 | 0.7230 | 0.0437  | 23.9892  |
| 529 | cg15798153 | PFTK1    | 7  | 0.7556 | 0.7134 | 0.0422  | 21.8964  |
| 530 | cg15811427 | FPR1     | 19 | 0.7886 | 0.7474 | 0.0413  | 23.6951  |
| 531 | cg15842430 | FAM12B   | 14 | 0.8339 | 0.7935 | 0.0405  | 27.9802  |
| 532 | cg15847988 | PLSCR2   | 3  | 0.8674 | 0.8336 | 0.0338  | 25.3640  |
| 533 | cg15869022 | GPR17    | 2  | 0.5197 | 0.4697 | 0.0501  | 20.3764  |
| 534 | cg15876417 | ABCD2    | 12 | 0.1569 | 0.1986 | -0.0416 | -24.9983 |
| 535 | cg15905979 | ST18     | 8  | 0.7987 | 0.7478 | 0.0509  | 34.4598  |
| 536 | cg16019620 | MEP1A    | 6  | 0.8576 | 0.8158 | 0.0418  | 33.4468  |
| 537 | cg16041611 | SRF      | 6  | 0.0505 | 0.0813 | -0.0308 | -28.8122 |
| 538 | cg16068780 | SBNO1    | 12 | 0.8545 | 0.8216 | 0.0329  | 22.5892  |
| 539 | cg16080552 | TACSTD2  | 1  | 0.4038 | 0.5047 | -0.1009 | -69.0948 |
| 540 | cg16098726 | GP9      | 3  | 0.7918 | 0.7508 | 0.0410  | 23.7221  |
| 541 | cg16106497 | NALP2    | 19 | 0.7488 | 0.7003 | 0.0485  | 26.7685  |
| 542 | cg16219122 | ABCB1    | 7  | 0.5528 | 0.4915 | 0.0613  | 28.7322  |
| 543 | cg16250754 | CARD6    | 5  | 0.1830 | 0.2257 | -0.0427 | -23.6069 |
| 544 | cg16290693 | SPSB1    | 1  | 0.0996 | 0.1483 | -0.0487 | -42.3602 |
| 545 | cg16360372 | SPINK1   | 5  | 0.8636 | 0.8323 | 0.0313  | 22.0694  |
| 546 | cg16386158 | IL1RL1   | 2  | 0.7471 | 0.6962 | 0.0509  | 28.8098  |
| 547 | cg16398289 | WDR49    | 3  | 0.8287 | 0.7887 | 0.0400  | 26.7681  |
| 548 | cg16404106 | FLJ23514 | 11 | 0.3636 | 0.3121 | 0.0516  | 23.5753  |
| 549 | cg16415646 | INHBA    | 7  | 0.8086 | 0.7670 | 0.0416  | 26.0235  |
| 550 | cg16474696 | MGC3207  | 19 | 0.3428 | 0.2876 | 0.0552  | 27.3765  |
| 551 | cg16505550 | PPAP2B   | 1  | 0.7958 | 0.7529 | 0.0429  | 25.8433  |
| 552 | cg16506346 | OR1E1    | 17 | 0.7936 | 0.7529 | 0.0407  | 23.6338  |
| 553 | cg16593081 | DYX1C1   | 15 | 0.9156 | 0.8877 | 0.0279  | 27.0037  |
| 554 | cg16625901 | ANKRD32  | 5  | 0.7157 | 0.6636 | 0.0520  | 27.4375  |
| 555 | cg16627949 | RNASE8   | 14 | 0.7462 | 0.7056 | 0.0407  | 20.0995  |
| 556 | cg16636571 | GYPB     | 4  | 0.8008 | 0.7621 | 0.0386  | 22.3883  |
| 557 | cg16639595 | SRI      | 7  | 0.8405 | 0.7750 | 0.0655  | 62.8188  |
| 558 | cg16650125 | MTTP     | 4  | 0.7714 | 0.7164 | 0.0549  | 35.1735  |
| 559 | cg16708623 | TRIM2    | 4  | 0.6879 | 0.6361 | 0.0518  | 25.6311  |
| 560 | cg16708981 | ZNF677   | 19 | 0.2216 | 0.1815 | 0.0402  | 21.5471  |
| 561 | cg16729794 | MOBP     | 3  | 0.7246 | 0.6802 | 0.0444  | 21.7568  |
| 562 | cg16753209 | NEB      | 2  | 0.7686 | 0.7182 | 0.0503  | 30.2538  |
| 563 | cg16786458 | PPARGC1B | 5  | 0.5453 | 0.4680 | 0.0773  | 42.7130  |
| 564 | cg16794882 | PMCHL2   | 5  | 0.7677 | 0.7168 | 0.0510  | 30.7720  |
| 565 | cg16823701 | IFNA1    | 9  | 0.8236 | 0.7808 | 0.0428  | 29.1069  |
| 566 | cg16855929 | EGLN1    | 1  | 0.8414 | 0.8065 | 0.0348  | 22.9712  |
| 567 | cg16899306 | HLA-DQB2 | 6  | 0.7897 | 0.7141 | 0.0756  | 63.7635  |

|     |            |               |    |        |        |         |          |
|-----|------------|---------------|----|--------|--------|---------|----------|
| 568 | cg16907488 | CCDC17        | 1  | 0.8636 | 0.8308 | 0.0328  | 23.7176  |
| 569 | cg16935075 | TPH1          | 11 | 0.7332 | 0.6804 | 0.0528  | 29.4089  |
| 570 | cg16957569 | INDOL1        | 8  | 0.6848 | 0.6248 | 0.0600  | 32.3920  |
| 571 | cg16979445 | NRM           | 6  | 0.8580 | 0.8241 | 0.0339  | 24.1249  |
| 572 | cg16986846 | SCGB2A1       | 11 | 0.7646 | 0.7204 | 0.0442  | 24.2290  |
| 573 | cg16991589 | PABPC3        | 13 | 0.4218 | 0.4737 | -0.0520 | -21.7220 |
| 574 | cg17001652 | CXCL13        | 4  | 0.7617 | 0.7171 | 0.0446  | 24.3811  |
| 575 | cg17016000 | RIN2          | 20 | 0.8661 | 0.8353 | 0.0308  | 21.8282  |
| 576 | cg17041296 | ASB17         | 1  | 0.7947 | 0.7369 | 0.0579  | 41.7643  |
| 577 | cg17095279 | APOH          | 17 | 0.8381 | 0.7891 | 0.0490  | 38.7760  |
| 578 | cg17099569 | GLI2          | 2  | 0.7175 | 0.6590 | 0.0585  | 33.3527  |
| 579 | cg17185639 | ITGB3         | 17 | 0.8297 | 0.7954 | 0.0343  | 21.1096  |
| 580 | cg17214210 | USP34         | 2  | 0.7714 | 0.7302 | 0.0412  | 22.2155  |
| 581 | cg17225169 | PJA2          | 5  | 0.8727 | 0.8428 | 0.0299  | 21.7794  |
| 582 | cg17233935 | DSCR10        | 21 | 0.7380 | 0.6949 | 0.0431  | 21.5473  |
| 583 | cg17279839 | RARRES2       | 7  | 0.2685 | 0.2247 | 0.0438  | 21.6315  |
| 584 | cg17281600 | FCRL4         | 1  | 0.7886 | 0.7370 | 0.0516  | 33.8319  |
| 585 | cg17338258 | SHBG          | 17 | 0.7846 | 0.7462 | 0.0384  | 20.8410  |
| 586 | cg17348429 | ENPP7         | 17 | 0.8199 | 0.7810 | 0.0388  | 24.4938  |
| 587 | cg17423978 | SIRPD         | 20 | 0.8335 | 0.8000 | 0.0335  | 20.7768  |
| 588 | cg17439694 | CP            | 3  | 0.7846 | 0.7352 | 0.0494  | 31.0239  |
| 589 | cg17446142 | GDF9          | 5  | 0.8858 | 0.8581 | 0.0277  | 21.1073  |
| 590 | cg17480438 | KIAA1244      | 6  | 0.6354 | 0.5828 | 0.0526  | 24.0369  |
| 591 | cg17489451 | DKFZP779L1558 | 12 | 0.7260 | 0.6808 | 0.0452  | 22.4618  |
| 592 | cg17496788 | DDR2          | 1  | 0.8546 | 0.8125 | 0.0421  | 33.2586  |
| 593 | cg17499294 | METAP1        | 4  | 0.8615 | 0.8282 | 0.0333  | 23.9228  |
| 594 | cg17503750 | KRTAP19-6     | 21 | 0.8173 | 0.7621 | 0.0552  | 42.4784  |
| 595 | cg17536071 | UNQ689        | 4  | 0.7269 | 0.6804 | 0.0465  | 23.5176  |
| 596 | cg17571291 | BLVRA         | 7  | 0.2594 | 0.3417 | -0.0823 | -56.5504 |
| 597 | cg17607024 | ZRANB1        | 10 | 0.7803 | 0.7073 | 0.0730  | 58.0784  |
| 598 | cg17607231 | SP140         | 2  | 0.2325 | 0.1837 | 0.0488  | 29.1080  |
| 599 | cg17607973 | BCDIN3        | 7  | 0.0778 | 0.1425 | -0.0646 | -76.4235 |
| 600 | cg17630127 | MS4A5         | 11 | 0.8804 | 0.8517 | 0.0287  | 21.5197  |
| 601 | cg17675150 | ZNF532        | 18 | 0.8468 | 0.8137 | 0.0331  | 21.8291  |
| 602 | cg17711541 | HIST1H2AC     | 6  | 0.4472 | 0.3876 | 0.0597  | 27.7104  |
| 603 | cg17751569 | CD180         | 5  | 0.8208 | 0.7860 | 0.0348  | 20.7146  |
| 604 | cg17761453 | LOR           | 1  | 0.8391 | 0.8001 | 0.0390  | 27.0351  |
| 605 | cg17767931 | SLC25A26      | 3  | 0.7962 | 0.7448 | 0.0513  | 34.5203  |
| 606 | cg17791936 | SLC37A4       | 11 | 0.8187 | 0.7645 | 0.0543  | 41.6016  |
| 607 | cg17820828 | KCNQ1         | 11 | 0.6581 | 0.5939 | 0.0642  | 34.5493  |
| 608 | cg17829936 | TAAR5         | 6  | 0.8491 | 0.8085 | 0.0406  | 30.4704  |

|     |            |           |    |        |        |         |           |
|-----|------------|-----------|----|--------|--------|---------|-----------|
| 609 | cg17901463 | GSTM1     | 1  | 0.2300 | 0.1521 | 0.0779  | 70.7945   |
| 610 | cg17925436 | PALLD     | 4  | 0.7397 | 0.6891 | 0.0507  | 27.9936   |
| 611 | cg17947599 | ACOXL     | 2  | 0.8889 | 0.8621 | 0.0269  | 20.6100   |
| 612 | cg17977362 | FLJ45964  | 2  | 0.7417 | 0.8969 | -0.1552 | -339.7414 |
| 613 | cg18003135 | EDNRB     | 13 | 0.7792 | 0.7367 | 0.0424  | 23.8955   |
| 614 | cg18087514 | KMO       | 1  | 0.6685 | 0.6211 | 0.0474  | 21.4227   |
| 615 | cg18117393 | NPL       | 1  | 0.8214 | 0.7776 | 0.0438  | 29.8381   |
| 616 | cg18128666 | NCOA1     | 2  | 0.8993 | 0.8626 | 0.0368  | 36.2603   |
| 617 | cg18156583 | IL18RAP   | 2  | 0.1753 | 0.2149 | -0.0396 | -21.5585  |
| 618 | cg18184219 | CEP170    | 1  | 0.8207 | 0.7785 | 0.0422  | 28.0090   |
| 619 | cg18236721 | C9orf26   | 9  | 0.7352 | 0.6841 | 0.0511  | 27.9785   |
| 620 | cg18254848 | CLC       | 19 | 0.8365 | 0.7949 | 0.0416  | 29.6206   |
| 621 | cg18328334 | TNS1      | 2  | 0.6690 | 0.5949 | 0.0741  | 44.8338   |
| 622 | cg18344063 | MGAT4C    | 12 | 0.7922 | 0.7488 | 0.0434  | 25.9463   |
| 623 | cg18364088 | CCDC14    | 3  | 0.7918 | 0.7391 | 0.0527  | 35.4674   |
| 624 | cg18370979 | C5orf21   | 5  | 0.8279 | 0.7795 | 0.0484  | 36.0992   |
| 625 | cg18397653 | DMP1      | 4  | 0.7833 | 0.7421 | 0.0411  | 23.0939   |
| 626 | cg18412984 | WDR20     | 14 | 0.8381 | 0.7899 | 0.0482  | 37.7352   |
| 627 | cg18437633 | ITGB6     | 2  | 0.8504 | 0.7992 | 0.0512  | 44.4271   |
| 628 | cg18459342 | TPD52     | 8  | 0.3505 | 0.2866 | 0.0640  | 34.9980   |
| 629 | cg18499731 | HBII-438B | 15 | 0.7863 | 0.7482 | 0.0381  | 20.6748   |
| 630 | cg18582689 | UNQ9356   | 6  | 0.6670 | 0.6154 | 0.0516  | 24.4970   |
| 631 | cg18632631 | TNK1      | 17 | 0.6789 | 0.6331 | 0.0458  | 20.6539   |
| 632 | cg18715868 | HIST1H2BN | 6  | 0.1261 | 0.1601 | -0.0340 | -20.8410  |
| 633 | cg18766912 | UBE3A     | 15 | 0.1421 | 0.1786 | -0.0365 | -21.6055  |
| 634 | cg18768283 | NUT       | 15 | 0.7697 | 0.7144 | 0.0553  | 35.4128   |
| 635 | cg18771300 | RHOJ      | 14 | 0.5040 | 0.5704 | -0.0664 | -33.2645  |
| 636 | cg18806365 | FABP5     | 8  | 0.3927 | 0.3306 | 0.0621  | 31.2401   |
| 637 | cg18862260 | GDF8      | 2  | 0.7801 | 0.7308 | 0.0492  | 30.3914   |
| 638 | cg18876189 | FGB       | 4  | 0.8600 | 0.8201 | 0.0399  | 31.4627   |
| 639 | cg18879041 | LIMS3     | 2  | 0.7487 | 0.7058 | 0.0429  | 22.0127   |
| 640 | cg18885346 | PKHD1     | 6  | 0.8156 | 0.7632 | 0.0525  | 38.8459   |
| 641 | cg18887228 | PHF3      | 6  | 0.8480 | 0.8117 | 0.0364  | 25.4259   |
| 642 | cg18901940 | FLJ14437  | 10 | 0.8195 | 0.7736 | 0.0460  | 31.9702   |
| 643 | cg18979762 | EGLN1     | 1  | 0.8222 | 0.7763 | 0.0458  | 32.2149   |
| 644 | cg18999668 | SLC28A3   | 9  | 0.8068 | 0.7709 | 0.0359  | 20.4602   |
| 645 | cg19034028 | CDH3      | 16 | 0.6532 | 0.6020 | 0.0513  | 23.6816   |
| 646 | cg19058765 | APOH      | 17 | 0.8488 | 0.8149 | 0.0339  | 22.9045   |
| 647 | cg19105504 | MGC35295  | 11 | 0.7531 | 0.6998 | 0.0533  | 31.5907   |
| 648 | cg19110684 | HAVCR2    | 5  | 0.1274 | 0.1655 | -0.0381 | -24.7114  |
| 649 | cg19120125 | TAS2R10   | 12 | 0.8118 | 0.7669 | 0.0450  | 29.8015   |

|     |            |           |    |        |        |         |          |
|-----|------------|-----------|----|--------|--------|---------|----------|
| 650 | cg19139729 | SULT2A1   | 19 | 0.7933 | 0.7441 | 0.0492  | 31.8706  |
| 651 | cg19203504 | RPE       | 2  | 0.3019 | 0.2495 | 0.0524  | 27.1208  |
| 652 | cg19242268 | TCEA2     | 20 | 0.5494 | 0.4882 | 0.0612  | 28.6506  |
| 653 | cg19255783 | PLAC8     | 4  | 0.0880 | 0.1242 | -0.0362 | -28.3386 |
| 654 | cg19399100 | UGT2A1    | 4  | 0.7717 | 0.7257 | 0.0460  | 26.4823  |
| 655 | cg19403023 | TESSP1    | 16 | 0.6911 | 0.6169 | 0.0742  | 46.8221  |
| 656 | cg19404190 | SPINK7    | 5  | 0.8211 | 0.7816 | 0.0395  | 25.3051  |
| 657 | cg19418958 | TEX15     | 8  | 0.6666 | 0.6068 | 0.0598  | 31.1699  |
| 658 | cg19428735 | RRH       | 4  | 0.6484 | 0.5994 | 0.0491  | 21.8905  |
| 659 | cg19453250 | STATIP1   | 18 | 0.4342 | 0.3788 | 0.0554  | 24.6803  |
| 660 | cg19510180 | TMPRSS11B | 4  | 0.7303 | 0.6826 | 0.0477  | 24.7419  |
| 661 | cg19510604 | CLK3      | 15 | 0.8573 | 0.8177 | 0.0396  | 30.6375  |
| 662 | cg19560210 | PGBD5     | 1  | 0.8799 | 0.8502 | 0.0297  | 22.5873  |
| 663 | cg19561186 | GUCA1C    | 3  | 0.7301 | 0.6854 | 0.0447  | 22.2743  |
| 664 | cg19612574 | MAPK8     | 10 | 0.8615 | 0.8296 | 0.0319  | 22.3886  |
| 665 | cg19666391 | UNQ689    | 4  | 0.7422 | 0.6959 | 0.0463  | 24.3836  |
| 666 | cg19682367 | FAM79B    | 3  | 0.8179 | 0.7683 | 0.0496  | 35.8635  |
| 667 | cg19690404 | CPA4      | 7  | 0.6792 | 0.6343 | 0.0449  | 20.0225  |
| 668 | cg19740969 | CXCL9     | 4  | 0.7877 | 0.7222 | 0.0656  | 49.9354  |
| 669 | cg19763281 | FAM77C    | 1  | 0.8381 | 0.7995 | 0.0386  | 26.5488  |
| 670 | cg19766460 | C21orf128 | 21 | 0.0626 | 0.0987 | -0.0361 | -33.5124 |
| 671 | cg19776090 | SUMO2     | 17 | 0.5021 | 0.4459 | 0.0562  | 24.6456  |
| 672 | cg19782598 | FLJ30046  | 13 | 0.8384 | 0.7998 | 0.0386  | 26.5373  |
| 673 | cg19831575 | FGF4      | 11 | 0.0545 | 0.1111 | -0.0566 | -73.0625 |
| 674 | cg19884600 | PYHIN1    | 1  | 0.8247 | 0.7824 | 0.0423  | 28.6177  |
| 675 | cg19972859 | PURA      | 5  | 0.0512 | 0.0808 | -0.0296 | -26.9435 |
| 676 | cg19984039 | RGS13     | 1  | 0.6436 | 0.5858 | 0.0578  | 28.3552  |
| 677 | cg20015689 | SEMG1     | 20 | 0.6478 | 0.5902 | 0.0576  | 28.4067  |
| 678 | cg20025970 | ABCC9     | 12 | 0.6974 | 0.6518 | 0.0456  | 21.3122  |
| 679 | cg20103550 | C14orf155 | 14 | 0.7106 | 0.6656 | 0.0451  | 21.5478  |
| 680 | cg20118424 | ABCB11    | 2  | 0.8862 | 0.8399 | 0.0462  | 47.2418  |
| 681 | cg20226593 | SLC12A1   | 15 | 0.7345 | 0.6900 | 0.0446  | 22.4714  |
| 682 | cg20234959 | NID1      | 1  | 0.7919 | 0.7484 | 0.0434  | 25.9939  |
| 683 | cg20286200 | EYA4      | 6  | 0.1841 | 0.1472 | 0.0369  | 21.4802  |
| 684 | cg20427865 | CX3CL1    | 16 | 0.8356 | 0.8013 | 0.0343  | 21.7359  |
| 685 | cg20439022 | SLC16A8   | 22 | 0.0879 | 0.0594 | 0.0284  | 23.7378  |
| 686 | cg20449692 | CLDN11    | 3  | 0.0920 | 0.1234 | -0.0314 | -22.1835 |
| 687 | cg20466180 | SCHIP1    | 3  | 0.1211 | 0.1545 | -0.0334 | -20.8303 |
| 688 | cg20507276 | OR2L13    | 1  | 0.3247 | 0.2164 | 0.1083  | 100.5814 |
| 689 | cg20514617 | PCDHA9    | 5  | 0.6240 | 0.5692 | 0.0548  | 25.2965  |
| 690 | cg20540428 | PPP4R2    | 3  | 0.5326 | 0.5911 | -0.0585 | -27.2888 |

|     |            |          |    |        |        |         |          |
|-----|------------|----------|----|--------|--------|---------|----------|
| 691 | cg20542190 | LILRA4   | 19 | 0.5159 | 0.4661 | 0.0498  | 20.1823  |
| 692 | cg20630386 | AFP      | 4  | 0.6529 | 0.6054 | 0.0475  | 20.9442  |
| 693 | cg20643416 | TOMM70A  | 3  | 0.0419 | 0.0845 | -0.0426 | -51.6543 |
| 694 | cg20773127 | ENPEP    | 4  | 0.6434 | 0.5967 | 0.0466  | 20.0410  |
| 695 | cg20857253 | TCP10L   | 21 | 0.4374 | 0.3530 | 0.0843  | 51.5122  |
| 696 | cg20887241 | HTR1D    | 1  | 0.8030 | 0.7611 | 0.0419  | 25.6977  |
| 697 | cg20906802 | OPN5     | 6  | 0.7931 | 0.7517 | 0.0414  | 24.2183  |
| 698 | cg20924286 | CLDN11   | 3  | 0.4497 | 0.3987 | 0.0510  | 21.2744  |
| 699 | cg20939319 | TEX15    | 8  | 0.6865 | 0.6373 | 0.0493  | 23.5498  |
| 700 | cg20945531 | FLJ34503 | 6  | 0.8558 | 0.6818 | 0.1741  | 374.3439 |
| 701 | cg20951539 | PXT1     | 6  | 0.7883 | 0.7384 | 0.0498  | 31.9351  |
| 702 | cg20980592 | MEP1A    | 6  | 0.9303 | 0.9091 | 0.0212  | 20.4115  |
| 703 | cg20988616 | ENPP3    | 6  | 0.8457 | 0.8063 | 0.0394  | 28.4797  |
| 704 | cg21010262 | MRPS2    | 9  | 0.0514 | 0.0798 | -0.0284 | -25.3036 |
| 705 | cg21021629 | NRIP1    | 21 | 0.8045 | 0.7636 | 0.0409  | 24.9124  |
| 706 | cg21022395 | SHOC2    | 10 | 0.7890 | 0.7466 | 0.0424  | 24.7271  |
| 707 | cg21023114 | IFNA14   | 9  | 0.8678 | 0.8312 | 0.0366  | 28.8679  |
| 708 | cg21039679 | FLJ35695 | 15 | 0.8060 | 0.7675 | 0.0385  | 22.7817  |
| 709 | cg21041127 | BCMP11   | 7  | 0.7163 | 0.6679 | 0.0483  | 24.4041  |
| 710 | cg21084260 | APOD     | 3  | 0.8086 | 0.7626 | 0.0460  | 30.4264  |
| 711 | cg21105318 | ITGB6    | 2  | 0.8168 | 0.7781 | 0.0387  | 23.9900  |
| 712 | cg21142398 | GLIS1    | 1  | 0.8665 | 0.8325 | 0.0341  | 25.5936  |
| 713 | cg21168622 | ZNF350   | 19 | 0.2050 | 0.2516 | -0.0466 | -25.2598 |
| 714 | cg21169285 | MAPK9    | 5  | 0.8509 | 0.8187 | 0.0322  | 21.3992  |
| 715 | cg21194776 | USP54    | 10 | 0.8212 | 0.7769 | 0.0443  | 30.3395  |
| 716 | cg21201572 | AGR2     | 7  | 0.8040 | 0.7622 | 0.0419  | 25.7379  |
| 717 | cg21270015 | HDCMA18P | 4  | 0.8652 | 0.8170 | 0.0483  | 44.0504  |
| 718 | cg21405195 | PEG10    | 7  | 0.8573 | 0.8251 | 0.0322  | 22.1996  |
| 719 | cg21409833 | ANGPTL3  | 1  | 0.8135 | 0.7602 | 0.0533  | 39.5189  |
| 720 | cg21431536 | LGR8     | 13 | 0.7794 | 0.7312 | 0.0482  | 29.2732  |
| 721 | cg21450627 | PSD4     | 2  | 0.7674 | 0.8211 | -0.0537 | -41.3801 |
| 722 | cg21457147 | KCTD4    | 13 | 0.8643 | 0.8300 | 0.0343  | 25.5286  |
| 723 | cg21474838 | KLRD1    | 12 | 0.7655 | 0.7178 | 0.0477  | 27.4421  |
| 724 | cg21621204 | HTN1     | 4  | 0.7677 | 0.7258 | 0.0418  | 22.4716  |
| 725 | cg21631409 | ALDH3B2  | 11 | 0.7041 | 0.6481 | 0.0559  | 30.0388  |
| 726 | cg21642649 | C21orf66 | 21 | 0.1133 | 0.0764 | 0.0368  | 31.3773  |
| 727 | cg21643191 | ABCB5    | 7  | 0.8263 | 0.7812 | 0.0451  | 31.9883  |
| 728 | cg21649520 | PMP2     | 8  | 0.7762 | 0.7231 | 0.0532  | 33.9707  |
| 729 | cg21660727 | PCGF3    | 4  | 0.0884 | 0.1420 | -0.0536 | -52.8357 |
| 730 | cg21717724 | PSMD5    | 9  | 0.7117 | 0.6558 | 0.0559  | 30.5545  |
| 731 | cg21727574 | ZNF137   | 19 | 0.8667 | 0.8282 | 0.0385  | 31.0821  |

|     |            |           |    |        |        |         |          |
|-----|------------|-----------|----|--------|--------|---------|----------|
| 732 | cg21736205 | ERVWE1    | 7  | 0.8762 | 0.8437 | 0.0325  | 25.3281  |
| 733 | cg21743649 | NUP98     | 11 | 0.9183 | 0.8908 | 0.0274  | 26.9265  |
| 734 | cg21874193 | TAS2R48   | 12 | 0.8241 | 0.7867 | 0.0374  | 23.5580  |
| 735 | cg21926612 | PARK2     | 6  | 0.1212 | 0.0715 | 0.0497  | 52.3440  |
| 736 | cg21929875 | VSIG2     | 11 | 0.8944 | 0.8654 | 0.0290  | 24.0877  |
| 737 | cg22024657 | SLC13A1   | 7  | 0.8588 | 0.8155 | 0.0433  | 35.6560  |
| 738 | cg22051636 | MRGPRX2   | 11 | 0.5425 | 0.4320 | 0.1106  | 81.6103  |
| 739 | cg22064451 | TUBA3     | 12 | 0.6905 | 0.6348 | 0.0557  | 28.9619  |
| 740 | cg22066521 | ABCB5     | 7  | 0.7551 | 0.7105 | 0.0446  | 23.9031  |
| 741 | cg22074858 | GBP3      | 1  | 0.1008 | 0.1349 | -0.0341 | -23.9677 |
| 742 | cg22152192 | CRYM      | 16 | 0.8219 | 0.7708 | 0.0511  | 38.3561  |
| 743 | cg22228134 | GZMH      | 14 | 0.8597 | 0.8249 | 0.0347  | 25.3058  |
| 744 | cg22324153 | SLC35D2   | 9  | 0.8155 | 0.7808 | 0.0347  | 20.1611  |
| 745 | cg22367970 | GON4      | 1  | 0.1477 | 0.1841 | -0.0363 | -20.9542 |
| 746 | cg22373097 | KRTAP21-1 | 21 | 0.7400 | 0.7882 | -0.0482 | -30.2595 |
| 747 | cg22392708 | KRT23     | 17 | 0.3539 | 0.3038 | 0.0502  | 22.8104  |
| 748 | cg22419732 | C6orf188  | 6  | 0.7919 | 0.7400 | 0.0518  | 34.5042  |
| 749 | cg22427279 | NHLH2     | 1  | 0.6089 | 0.5598 | 0.0491  | 20.8314  |
| 750 | cg22432908 | KLRC2     | 12 | 0.7845 | 0.7229 | 0.0617  | 44.5985  |
| 751 | cg22487322 | IL20RA    | 6  | 0.9287 | 0.9067 | 0.0220  | 21.2799  |
| 752 | cg22506453 | KA35      | 17 | 0.8408 | 0.8003 | 0.0406  | 29.0705  |
| 753 | cg22568695 | KIAA1468  | 18 | 0.8069 | 0.7574 | 0.0494  | 33.9522  |
| 754 | cg22586527 | SOX6      | 11 | 0.6629 | 0.6149 | 0.0479  | 21.5785  |
| 755 | cg22598744 | MLANA     | 9  | 0.8941 | 0.8489 | 0.0453  | 48.4114  |
| 756 | cg22628694 | ZNF329    | 19 | 0.8813 | 0.8506 | 0.0308  | 24.0606  |
| 757 | cg22679120 | SNX8      | 7  | 0.6628 | 0.6161 | 0.0467  | 20.6936  |
| 758 | cg22699362 | FLJ10996  | 2  | 0.8024 | 0.7385 | 0.0639  | 50.7083  |
| 759 | cg22726338 | C1orf62   | 1  | 0.7322 | 0.6864 | 0.0458  | 23.3244  |
| 760 | cg22730560 | SNRPA1    | 15 | 0.4907 | 0.4368 | 0.0540  | 23.0399  |
| 761 | cg22730830 | PRSS21    | 16 | 0.7346 | 0.6881 | 0.0465  | 24.0153  |
| 762 | cg22778145 | CLK4      | 5  | 0.4094 | 0.3581 | 0.0513  | 22.1263  |
| 763 | cg22783258 | LMO7      | 13 | 0.8338 | 0.7977 | 0.0361  | 23.3348  |
| 764 | cg22833175 | WBP11     | 12 | 0.7855 | 0.7454 | 0.0400  | 22.3131  |
| 765 | cg22836132 | LONRF1    | 8  | 0.7982 | 0.7509 | 0.0473  | 30.5105  |
| 766 | cg22940988 | IQCH      | 15 | 0.7702 | 0.7287 | 0.0415  | 22.3459  |
| 767 | cg23001457 | MRGPRX1   | 11 | 0.6896 | 0.6382 | 0.0515  | 25.4384  |
| 768 | cg23126947 | NSUN3     | 3  | 0.8153 | 0.7631 | 0.0522  | 38.5189  |
| 769 | cg23154064 | C3orf63   | 3  | 0.7629 | 0.7221 | 0.0407  | 21.2214  |
| 770 | cg23163573 | SULT1C1   | 2  | 0.6466 | 0.5469 | 0.0997  | 72.7164  |
| 771 | cg23183296 | UGT2B28   | 4  | 0.7635 | 0.6809 | 0.0827  | 67.7792  |
| 772 | cg23196557 | FLJ44691  | 4  | 0.6837 | 0.6345 | 0.0492  | 23.3772  |

|     |            |          |    |        |        |         |          |
|-----|------------|----------|----|--------|--------|---------|----------|
| 773 | cg23205183 | NECAP1   | 12 | 0.7556 | 0.7137 | 0.0419  | 21.6855  |
| 774 | cg23254045 | TMCO5    | 15 | 0.7520 | 0.7075 | 0.0445  | 23.5881  |
| 775 | cg23256150 | NR1H4    | 12 | 0.8037 | 0.7610 | 0.0428  | 26.6169  |
| 776 | cg23264413 | PSG4     | 19 | 0.7026 | 0.6363 | 0.0662  | 39.5903  |
| 777 | cg23322523 | TRIM55   | 8  | 0.7637 | 0.7209 | 0.0428  | 22.9894  |
| 778 | cg23328124 | GRLF1    | 19 | 0.8179 | 0.7769 | 0.0410  | 26.4738  |
| 779 | cg23523368 | AMPD1    | 1  | 0.8487 | 0.8102 | 0.0386  | 28.0193  |
| 780 | cg23540745 | HIST1H4G | 6  | 0.8610 | 0.8267 | 0.0343  | 25.0204  |
| 781 | cg23588759 | GJB7     | 6  | 0.8003 | 0.7628 | 0.0375  | 21.3587  |
| 782 | cg23679141 | ANP32C   | 4  | 0.2704 | 0.2238 | 0.0466  | 23.9928  |
| 783 | cg23683201 | SLC22A9  | 11 | 0.8448 | 0.8086 | 0.0362  | 24.8169  |
| 784 | cg23719367 | LONRF1   | 8  | 0.8378 | 0.8010 | 0.0368  | 24.5409  |
| 785 | cg23855121 | TLR10    | 4  | 0.7853 | 0.7443 | 0.0411  | 23.2045  |
| 786 | cg23855818 | SLC41A2  | 12 | 0.7530 | 0.7046 | 0.0485  | 27.0805  |
| 787 | cg23873703 | KCNAB1   | 3  | 0.7700 | 0.7097 | 0.0603  | 40.8423  |
| 788 | cg23887102 | TAAR6    | 6  | 0.8407 | 0.8049 | 0.0359  | 23.9382  |
| 789 | cg23953831 | IGSF2    | 1  | 0.0918 | 0.1418 | -0.0500 | -46.3390 |
| 790 | cg24076830 | OR5V1    | 6  | 0.8443 | 0.8027 | 0.0416  | 30.8466  |
| 791 | cg24116886 | DEFB127  | 20 | 0.8669 | 0.8319 | 0.0350  | 26.7892  |
| 792 | cg24167928 | UTP14C   | 13 | 0.8762 | 0.8410 | 0.0352  | 28.5913  |
| 793 | cg24202119 | CAPSL    | 5  | 0.6490 | 0.5987 | 0.0503  | 22.8291  |
| 794 | cg24210717 | GPD1     | 12 | 0.7336 | 0.6870 | 0.0466  | 24.0992  |
| 795 | cg24243265 | MLZE     | 8  | 0.8505 | 0.8177 | 0.0328  | 21.9688  |
| 796 | cg24249775 | KRT10    | 17 | 0.8524 | 0.8151 | 0.0373  | 27.1687  |
| 797 | cg24333473 | ZNF597   | 16 | 0.4391 | 0.3896 | 0.0496  | 20.4252  |
| 798 | cg24414383 | KRTAP1-1 | 17 | 0.8005 | 0.7582 | 0.0422  | 25.7179  |
| 799 | cg24426405 | AGR2     | 7  | 0.7496 | 0.7070 | 0.0426  | 21.8262  |
| 800 | cg24443367 | SLC16A9  | 10 | 0.8079 | 0.7695 | 0.0384  | 22.8459  |
| 801 | cg24450631 | IGF2BP2  | 3  | 0.3480 | 0.2847 | 0.0633  | 34.4763  |
| 802 | cg24459209 | PRG3     | 11 | 0.8414 | 0.7946 | 0.0467  | 36.5077  |
| 803 | cg24469977 | FLJ40288 | 7  | 0.8486 | 0.8079 | 0.0407  | 30.4133  |
| 804 | cg24499411 | TNS3     | 7  | 0.7757 | 0.7352 | 0.0405  | 21.9301  |
| 805 | cg24556026 | GNE      | 9  | 0.6680 | 0.6214 | 0.0467  | 20.8644  |
| 806 | cg24603941 | MIA2     | 14 | 0.8231 | 0.7847 | 0.0384  | 24.4423  |
| 807 | cg24648061 | GPR22    | 7  | 0.7034 | 0.6476 | 0.0558  | 29.9073  |
| 808 | cg24654547 | DUS2L    | 16 | 0.0522 | 0.0959 | -0.0437 | -49.3161 |
| 809 | cg24655310 | CYP4F11  | 19 | 0.8003 | 0.6837 | 0.1166  | 137.8433 |
| 810 | cg24678320 | FLJ38451 | 19 | 0.8255 | 0.8570 | -0.0315 | -21.4158 |
| 811 | cg24735489 | CDSN     | 6  | 0.4748 | 0.3963 | 0.0785  | 44.1105  |
| 812 | cg24760768 | DNAH8    | 6  | 0.9302 | 0.9070 | 0.0232  | 23.4444  |
| 813 | cg24776019 | HYPB     | 3  | 0.8410 | 0.8024 | 0.0385  | 26.8055  |

|     |            |          |    |        |        |         |          |
|-----|------------|----------|----|--------|--------|---------|----------|
| 814 | cg24816298 | PTH      | 11 | 0.8157 | 0.7747 | 0.0409  | 26.1326  |
| 815 | cg24820250 | CLEC2A   | 12 | 0.8341 | 0.7780 | 0.0561  | 47.3296  |
| 816 | cg24829483 | C1QTNF7  | 4  | 0.8497 | 0.8177 | 0.0320  | 21.0692  |
| 817 | cg24831427 | COQ3     | 6  | 0.7840 | 0.7311 | 0.0528  | 34.5634  |
| 818 | cg24899750 | SNRPB2   | 20 | 0.6586 | 0.6105 | 0.0481  | 21.5871  |
| 819 | cg24949049 | TDRD3    | 13 | 0.8743 | 0.8397 | 0.0346  | 27.4888  |
| 820 | cg24956866 | CALD1    | 7  | 0.6402 | 0.5928 | 0.0474  | 20.4744  |
| 821 | cg24999727 | HSD17B13 | 4  | 0.8350 | 0.7893 | 0.0457  | 34.0879  |
| 822 | cg25004981 | LASS3    | 15 | 0.7769 | 0.8450 | -0.0682 | -68.6969 |
| 823 | cg25032865 | FLJ44186 | 7  | 0.8068 | 0.7672 | 0.0396  | 23.8155  |
| 824 | cg25040282 | HTN3     | 4  | 0.7570 | 0.7160 | 0.0410  | 21.0626  |
| 825 | cg25106358 | CLDN20   | 6  | 0.8685 | 0.8379 | 0.0306  | 21.8761  |
| 826 | cg25112853 | HSC20    | 22 | 0.7624 | 0.7094 | 0.0530  | 32.2784  |
| 827 | cg25133685 | OR2W1    | 6  | 0.4816 | 0.4156 | 0.0660  | 32.4493  |
| 828 | cg25157408 | HAO1     | 20 | 0.8070 | 0.7550 | 0.0520  | 36.8350  |
| 829 | cg25159668 | AADA2L2  | 3  | 0.7422 | 0.6884 | 0.0538  | 31.0732  |
| 830 | cg25177139 | SLC10A6  | 4  | 0.8880 | 0.8604 | 0.0276  | 21.3192  |
| 831 | cg25217765 | CX62     | 6  | 0.8536 | 0.8196 | 0.0340  | 23.6778  |
| 832 | cg25375711 | TRMT12   | 8  | 0.0654 | 0.0421 | 0.0233  | 20.1638  |
| 833 | cg25397076 | RBP7     | 1  | 0.0579 | 0.0324 | 0.0255  | 25.2818  |
| 834 | cg25414165 | C10orf11 | 10 | 0.7443 | 0.6998 | 0.0445  | 23.0365  |
| 835 | cg25427580 | B3GALT1  | 2  | 0.9099 | 0.8766 | 0.0333  | 33.9347  |
| 836 | cg25427638 | CYP2A7   | 19 | 0.7935 | 0.8277 | -0.0342 | -20.8820 |
| 837 | cg25463135 | GBP7     | 1  | 0.8323 | 0.7944 | 0.0379  | 24.9916  |
| 838 | cg25463409 | COX7B2   | 4  | 0.7732 | 0.7305 | 0.0427  | 23.6742  |
| 839 | cg25494064 | TMOD1    | 9  | 0.8112 | 0.7676 | 0.0436  | 28.2474  |
| 840 | cg25500444 | FLJ23514 | 11 | 0.2383 | 0.1939 | 0.0443  | 24.1690  |
| 841 | cg25567232 | GSTA5    | 6  | 0.8446 | 0.8090 | 0.0357  | 24.2340  |
| 842 | cg25569462 | FLJ25801 | 4  | 0.8313 | 0.7664 | 0.0649  | 59.0850  |
| 843 | cg25575065 | ARSA     | 22 | 0.1665 | 0.1175 | 0.0490  | 38.8428  |
| 844 | cg25600236 | C4orf7   | 4  | 0.6976 | 0.6398 | 0.0578  | 31.2503  |
| 845 | cg25608949 | TMPRSS3  | 21 | 0.8017 | 0.7627 | 0.0390  | 22.8324  |
| 846 | cg25651505 | VAMP5    | 2  | 0.2452 | 0.1997 | 0.0455  | 24.7185  |
| 847 | cg25677688 | TAS2R48  | 12 | 0.8145 | 0.7611 | 0.0534  | 39.7440  |
| 848 | cg25692621 | ASB4     | 7  | 0.7467 | 0.6873 | 0.0595  | 37.0647  |
| 849 | cg25697314 | IL26     | 12 | 0.7548 | 0.7138 | 0.0410  | 20.8699  |
| 850 | cg25737836 | MCM3AP   | 21 | 0.8450 | 0.8069 | 0.0381  | 26.8705  |
| 851 | cg25769980 | TLR6     | 4  | 0.8967 | 0.8648 | 0.0319  | 28.4322  |
| 852 | cg25864727 | C21orf42 | 21 | 0.8276 | 0.7877 | 0.0399  | 26.4944  |
| 853 | cg25892041 | UGT8     | 4  | 0.8267 | 0.7899 | 0.0368  | 23.2628  |
| 854 | cg26049501 | STARD13  | 13 | 0.1270 | 0.1610 | -0.0339 | -20.7088 |



|     |            |          |    |        |        |         |          |
|-----|------------|----------|----|--------|--------|---------|----------|
| 855 | cg26059632 | SPRR2A   | 1  | 0.7125 | 0.6693 | 0.0431  | 20.1907  |
| 856 | cg26073856 | FABP2    | 4  | 0.7173 | 0.6685 | 0.0488  | 24.8302  |
| 857 | cg26081812 | IL5      | 5  | 0.8137 | 0.7727 | 0.0409  | 25.8617  |
| 858 | cg26106720 | STX12    | 1  | 0.8652 | 0.8346 | 0.0306  | 21.5143  |
| 859 | cg26109803 | WNT8B    | 10 | 0.7874 | 0.7501 | 0.0373  | 20.1464  |
| 860 | cg26117431 | LRRC39   | 1  | 0.8555 | 0.8248 | 0.0307  | 20.3693  |
| 861 | cg26159933 | CHIA     | 1  | 0.7831 | 0.7263 | 0.0568  | 38.7500  |
| 862 | cg26170257 | ZNF336   | 20 | 0.7999 | 0.7594 | 0.0405  | 24.0262  |
| 863 | cg26205432 | PLN      | 6  | 0.6848 | 0.6317 | 0.0530  | 26.4523  |
| 864 | cg26238727 | UGT1A10  | 2  | 0.8673 | 0.8377 | 0.0296  | 20.6698  |
| 865 | cg26247501 | GBP7     | 1  | 0.7827 | 0.7358 | 0.0469  | 28.3777  |
| 866 | cg26256793 | COL11A1  | 1  | 0.2502 | 0.1987 | 0.0515  | 30.2510  |
| 867 | cg26264314 | NALP5    | 19 | 0.7906 | 0.8300 | -0.0394 | -26.2913 |
| 868 | cg26266326 | GCG      | 2  | 0.8195 | 0.7807 | 0.0388  | 24.4516  |
| 869 | cg26379475 | SH2D1B   | 1  | 0.8299 | 0.7809 | 0.0490  | 37.2040  |
| 870 | cg26390526 | FLG      | 1  | 0.8812 | 0.8538 | 0.0274  | 20.0612  |
| 871 | cg26443244 | GDPD4    | 11 | 0.7018 | 0.6508 | 0.0511  | 25.7821  |
| 872 | cg26470338 | ARSB     | 5  | 0.7473 | 0.7010 | 0.0462  | 24.6875  |
| 873 | cg26514942 | FLJ30294 | 2  | 0.8576 | 0.8166 | 0.0410  | 32.3761  |
| 874 | cg26532905 | RNASL    | 1  | 0.7831 | 0.7453 | 0.0378  | 20.2366  |
| 875 | cg26583078 | SORBS2   | 4  | 0.8943 | 0.8681 | 0.0262  | 20.6094  |
| 876 | cg26594488 | LOC54103 | 7  | 0.7812 | 0.7302 | 0.0510  | 32.2639  |
| 877 | cg26666286 | KIAA0317 | 14 | 0.8580 | 0.8253 | 0.0328  | 22.8754  |
| 878 | cg26675077 | TUBB8    | 10 | 0.6899 | 0.7327 | -0.0428 | -20.9490 |
| 879 | cg26682500 | FLJ40919 | 13 | 0.8183 | 0.7743 | 0.0440  | 29.6137  |
| 880 | cg26692016 | APOBEC1  | 12 | 0.8487 | 0.8142 | 0.0344  | 23.4613  |
| 881 | cg26706003 | AVPR1A   | 12 | 0.5741 | 0.5183 | 0.0558  | 24.9223  |
| 882 | cg26766480 | IFNA6    | 9  | 0.7937 | 0.7426 | 0.0512  | 34.0590  |
| 883 | cg26822175 | CRYBA4   | 22 | 0.7941 | 0.7221 | 0.0720  | 59.7828  |
| 884 | cg26847490 | ASB4     | 7  | 0.7430 | 0.6957 | 0.0473  | 25.2832  |
| 885 | cg26851800 | SPINK5L2 | 5  | 0.8072 | 0.7653 | 0.0419  | 26.0982  |
| 886 | cg26853855 | TAIP-2   | 2  | 0.7550 | 0.7048 | 0.0501  | 28.7726  |
| 887 | cg26866014 | C7orf33  | 7  | 0.8267 | 0.7826 | 0.0441  | 30.9912  |
| 888 | cg26960719 | KCNJ16   | 17 | 0.8078 | 0.7722 | 0.0356  | 20.2902  |
| 889 | cg26981881 | 12SEP11  | 9  | 0.7905 | 0.7472 | 0.0433  | 25.7006  |
| 890 | cg26987645 | FMOD     | 1  | 0.4353 | 0.3389 | 0.0964  | 66.1307  |
| 891 | cg26989103 | TRHR     | 8  | 0.6879 | 0.6364 | 0.0514  | 25.3108  |
| 892 | cg27003571 | GTDC1    | 2  | 0.7343 | 0.6898 | 0.0444  | 22.3476  |
| 893 | cg27063986 | NDST4    | 4  | 0.9006 | 0.8695 | 0.0311  | 28.1464  |
| 894 | cg27105123 | EPS8L1   | 19 | 0.4812 | 0.5964 | -0.1152 | -89.9081 |
| 895 | cg27149093 | SLC41A2  | 12 | 0.7945 | 0.7461 | 0.0484  | 31.2548  |

|     |            |           |    |        |        |        |         |
|-----|------------|-----------|----|--------|--------|--------|---------|
| 896 | cg27168844 | IL17      | 6  | 0.7956 | 0.7461 | 0.0495 | 32.5190 |
| 897 | cg27190239 | CLEC2A    | 12 | 0.7256 | 0.6668 | 0.0589 | 34.4096 |
| 898 | cg27195224 | BPIL2     | 22 | 0.7476 | 0.7026 | 0.0450 | 23.6518 |
| 899 | cg27202708 | C1orf65   | 1  | 0.3644 | 0.3150 | 0.0494 | 21.8980 |
| 900 | cg27226214 | VHL       | 3  | 0.8478 | 0.8146 | 0.0333 | 22.1122 |
| 901 | cg27227156 | FAM55A    | 11 | 0.7707 | 0.7262 | 0.0446 | 25.1017 |
| 902 | cg27297176 | TRIM43    | 2  | 0.8162 | 0.7666 | 0.0496 | 35.5925 |
| 903 | cg27345534 | PRB2      | 12 | 0.7439 | 0.6999 | 0.0439 | 22.5465 |
| 904 | cg27351998 | IFNA5     | 9  | 0.8808 | 0.8346 | 0.0462 | 45.4415 |
| 905 | cg27377450 | ARHGEF18  | 19 | 0.9016 | 0.8696 | 0.0320 | 29.7479 |
| 906 | cg27456885 | KRTAP22-1 | 21 | 0.7870 | 0.7480 | 0.0391 | 21.6185 |
| 907 | cg27459381 | CHST12    | 7  | 0.8783 | 0.8476 | 0.0307 | 23.5166 |
| 908 | cg27488807 | SPINK7    | 5  | 0.7451 | 0.7014 | 0.0437 | 22.3977 |
| 909 | cg27497781 | CHIA      | 1  | 0.8067 | 0.7505 | 0.0563 | 41.8914 |
| 910 | cg27541541 | PRL       | 6  | 0.7519 | 0.7060 | 0.0458 | 24.6979 |
| 911 | cg27547703 | TDRD1     | 10 | 0.8696 | 0.8387 | 0.0309 | 22.4263 |
| 912 | cg27562023 | RPH3AL    | 17 | 0.7431 | 0.6967 | 0.0464 | 24.4916 |
| 913 | cg27585441 | CCDC54    | 3  | 0.7272 | 0.6827 | 0.0446 | 22.0271 |
| 914 | cg27609819 | PLCL1     | 2  | 0.8351 | 0.7823 | 0.0528 | 43.0434 |

Table S3

*Methylation level measurements (AvgBeta) for 914 Illumina Infinium27 array probes which have shown statistically significant ( $p < 0.01$ ) differences in AvgBeta values between “Institutionalized Children” and “Comparison Children” (labeled as Ctr) groups. CpG sites located on sex chromosomes are excluded.*

| N  | TargetID   | 1011 F_9 | 1019 M_8 | 1012 M_8 | 1013 M_8 | 1014 M_8 | 1015 M_8 | 1016 M_9 | 1017 M_7 | 1018 F_9 | 1020 M_8 | 1022 F_9 | 1023 F_7 | 1024 F_7 | 1039 M_9 |
|----|------------|----------|----------|----------|----------|----------|----------|----------|----------|----------|----------|----------|----------|----------|----------|
| 1  | cg00079056 | 0.7926   | 0.8567   | 0.8386   | 0.8768   | 0.8764   | 0.8227   | 0.8541   | 0.8703   | 0.8594   | 0.7663   | 0.8709   | 0.8830   | 0.8800   | 0.8657   |
| 2  | cg00132141 | 0.6702   | 0.7296   | 0.6816   | 0.6777   | 0.7125   | 0.6932   | 0.7173   | 0.7081   | 0.7544   | 0.7148   | 0.7326   | 0.7636   | 0.7400   | 0.6709   |
| 3  | cg00134539 | 0.5844   | 0.5474   | 0.4554   | 0.4918   | 0.4741   | 0.4648   | 0.5370   | 0.5405   | 0.5102   | 0.4543   | 0.5731   | 0.4109   | 0.6382   | 0.6620   |
| 4  | cg00183782 | 0.7137   | 0.7687   | 0.7752   | 0.7424   | 0.7499   | 0.7611   | 0.7657   | 0.7269   | 0.7707   | 0.7524   | 0.7347   | 0.7536   | 0.7655   | 0.7420   |
| 5  | cg00364814 | 0.8630   | 0.8631   | 0.8882   | 0.8666   | 0.8689   | 0.8696   | 0.8753   | 0.8544   | 0.8543   | 0.8720   | 0.8643   | 0.8630   | 0.8770   | 0.8209   |
| 6  | cg00393585 | 0.1197   | 0.0836   | 0.0517   | 0.0670   | 0.0668   | 0.0716   | 0.0623   | 0.0587   | 0.0925   | 0.2085   | 0.1171   | 0.0898   | 0.1011   | 0.0820   |
| 7  | cg00398048 | 0.3888   | 0.4175   | 0.4340   | 0.4078   | 0.5336   | 0.4562   | 0.5570   | 0.4029   | 0.3905   | 0.5417   | 0.4490   | 0.4847   | 0.5170   | 0.4731   |
| 8  | cg00410895 | 0.8500   | 0.8694   | 0.8625   | 0.8617   | 0.8728   | 0.8781   | 0.8824   | 0.8707   | 0.8858   | 0.8872   | 0.8795   | 0.8638   | 0.8807   | 0.8241   |
| 9  | cg00436282 | 0.8195   | 0.8223   | 0.8256   | 0.8575   | 0.8578   | 0.8465   | 0.8344   | 0.8579   | 0.8450   | 0.8353   | 0.8408   | 0.8497   | 0.8364   | 0.8165   |
| 10 | cg00461841 | 0.6986   | 0.7352   | 0.7476   | 0.6764   | 0.7056   | 0.6918   | 0.7207   | 0.7468   | 0.7016   | 0.6932   | 0.6904   | 0.6645   | 0.7057   | 0.6734   |
| 11 | cg00519208 | 0.7839   | 0.7830   | 0.7996   | 0.7933   | 0.8334   | 0.8074   | 0.8176   | 0.7939   | 0.7849   | 0.8077   | 0.8051   | 0.8113   | 0.7678   | 0.7206   |
| 12 | cg00539322 | 0.7060   | 0.7695   | 0.7511   | 0.7405   | 0.7561   | 0.7476   | 0.7716   | 0.7707   | 0.7491   | 0.7707   | 0.7859   | 0.7676   | 0.7444   | 0.7147   |
| 13 | cg00550617 | 0.6488   | 0.6731   | 0.7025   | 0.7093   | 0.7579   | 0.7271   | 0.7046   | 0.7021   | 0.6813   | 0.6528   | 0.6924   | 0.7311   | 0.6346   | 0.6510   |
| 14 | cg00577167 | 0.7881   | 0.8393   | 0.8371   | 0.7886   | 0.8235   | 0.8282   | 0.7927   | 0.7715   | 0.7996   | 0.8117   | 0.8309   | 0.8098   | 0.7990   | 0.7824   |
| 15 | cg00579393 | 0.8056   | 0.8397   | 0.8419   | 0.8315   | 0.8339   | 0.8315   | 0.8347   | 0.8203   | 0.8373   | 0.8417   | 0.8292   | 0.8277   | 0.8177   | 0.7939   |
| 16 | cg00594118 | 0.0470   | 0.0649   | 0.0849   | 0.0672   | 0.0412   | 0.0453   | 0.0869   | 0.0469   | 0.0660   | 0.0683   | 0.0634   | 0.0573   | 0.0620   | 0.0418   |
| 17 | cg00695416 | 0.0369   | 0.0464   | 0.0422   | 0.0386   | 0.0363   | 0.0350   | 0.0721   | 0.0314   | 0.0508   | 0.0544   | 0.0544   | 0.0569   | 0.0726   | 0.0480   |
| 18 | cg00722300 | 0.7516   | 0.7721   | 0.8004   | 0.7649   | 0.7902   | 0.7987   | 0.7863   | 0.7775   | 0.7576   | 0.7755   | 0.7852   | 0.7876   | 0.7332   | 0.6776   |
| 19 | cg00729708 | 0.4300   | 0.3747   | 0.5769   | 0.7352   | 0.4561   | 0.5611   | 0.9447   | 0.3966   | 0.9119   | 0.4037   | 0.9188   | 0.8747   | 0.7381   | 0.4815   |
| 20 | cg00745735 | 0.7776   | 0.7985   | 0.7751   | 0.8068   | 0.7694   | 0.7989   | 0.7888   | 0.7441   | 0.7855   | 0.7937   | 0.7901   | 0.7746   | 0.7894   | 0.7261   |
| 21 | cg00763889 | 0.8345   | 0.8671   | 0.8534   | 0.8501   | 0.8492   | 0.8424   | 0.8421   | 0.8645   | 0.8385   | 0.8616   | 0.8574   | 0.8537   | 0.8564   | 0.8054   |
| 22 | cg00911873 | 0.7835   | 0.8456   | 0.8570   | 0.7935   | 0.8278   | 0.8511   | 0.8083   | 0.7579   | 0.8496   | 0.8494   | 0.8136   | 0.8087   | 0.8294   | 0.8230   |
| 23 | cg00933411 | 0.5008   | 0.5394   | 0.3579   | 0.4164   | 0.5749   | 0.5247   | 0.4441   | 0.4566   | 0.4689   | 0.5008   | 0.5403   | 0.5387   | 0.5556   | 0.3621   |
| 24 | cg00949554 | 0.1410   | 0.1308   | 0.1066   | 0.1349   | 0.1891   | 0.1379   | 0.1886   | 0.1441   | 0.1733   | 0.2850   | 0.1781   | 0.1442   | 0.1482   | 0.1428   |
| 25 | cg01035238 | 0.8377   | 0.8466   | 0.8509   | 0.8211   | 0.8635   | 0.8504   | 0.8571   | 0.8470   | 0.8377   | 0.8620   | 0.8238   | 0.8415   | 0.8323   | 0.8368   |
| 26 | cg01120761 | 0.8577   | 0.8807   | 0.6497   | 0.8632   | 0.8826   | 0.8961   | 0.8887   | 0.8654   | 0.8868   | 0.8774   | 0.6100   | 0.6320   | 0.8559   | 0.5805   |
| 27 | cg01216369 | 0.9111   | 0.9174   | 0.9273   | 0.9138   | 0.9152   | 0.9146   | 0.9141   | 0.9065   | 0.9015   | 0.9170   | 0.9043   | 0.8976   | 0.9163   | 0.8792   |
| 28 | cg01243790 | 0.8307   | 0.8455   | 0.8483   | 0.8321   | 0.8475   | 0.8377   | 0.8481   | 0.8603   | 0.8355   | 0.8504   | 0.8413   | 0.8200   | 0.8228   | 0.8326   |
| 29 | cg01269048 | 0.7605   | 0.8004   | 0.7937   | 0.7908   | 0.7670   | 0.7795   | 0.8202   | 0.7285   | 0.7733   | 0.7625   | 0.7670   | 0.7816   | 0.7801   | 0.6948   |
| 30 | cg01309152 | 0.7976   | 0.8224   | 0.8523   | 0.8116   | 0.8382   | 0.8221   | 0.8370   | 0.8123   | 0.8091   | 0.8254   | 0.8268   | 0.8131   | 0.8044   | 0.7568   |
| 31 | cg01320507 | 0.7608   | 0.7745   | 0.7482   | 0.7196   | 0.7638   | 0.7570   | 0.7398   | 0.7292   | 0.7687   | 0.7483   | 0.7514   | 0.7513   | 0.7133   | 0.7107   |
| 32 | cg01324261 | 0.8367   | 0.8531   | 0.8561   | 0.8325   | 0.8513   | 0.8683   | 0.8502   | 0.8265   | 0.8170   | 0.8362   | 0.8301   | 0.8321   | 0.8316   | 0.8018   |
| 33 | cg01416012 | 0.7025   | 0.7975   | 0.7842   | 0.7543   | 0.7525   | 0.7659   | 0.7401   | 0.7566   | 0.7724   | 0.7432   | 0.8032   | 0.7482   | 0.7640   | 0.7270   |
| 34 | cg01517033 | 0.7224   | 0.7814   | 0.7918   | 0.7735   | 0.7359   | 0.7780   | 0.7619   | 0.7753   | 0.7930   | 0.7617   | 0.7994   | 0.7968   | 0.7826   | 0.7201   |
| 35 | cg01521624 | 0.8402   | 0.8563   | 0.8458   | 0.8565   | 0.8800   | 0.8532   | 0.8761   | 0.8903   | 0.8535   | 0.8619   | 0.8501   | 0.8598   | 0.8469   | 0.8173   |
| 36 | cg01541443 | 0.8637   | 0.8704   | 0.8863   | 0.8758   | 0.8701   | 0.9017   | 0.8784   | 0.8745   | 0.8579   | 0.8731   | 0.8733   | 0.8836   | 0.8666   | 0.8258   |
| 37 | cg01546046 | 0.3383   | 0.4049   | 0.4168   | 0.3670   | 0.3875   | 0.3818   | 0.3717   | 0.3869   | 0.4374   | 0.4005   | 0.4278   | 0.4268   | 0.4175   | 0.3541   |
| 38 | cg01549015 | 0.7907   | 0.8297   | 0.8486   | 0.8185   | 0.8277   | 0.8070   | 0.8079   | 0.7966   | 0.8198   | 0.8305   | 0.8373   | 0.8095   | 0.7972   | 0.7628   |
| 39 | cg01605517 | 0.8125   | 0.8276   | 0.8316   | 0.8103   | 0.8338   | 0.8370   | 0.8607   | 0.8466   | 0.8640   | 0.8387   | 0.8137   | 0.8258   | 0.8182   | 0.8248   |
| 40 | cg01623187 | 0.7943   | 0.8414   | 0.8046   | 0.8007   | 0.8187   | 0.8145   | 0.8207   | 0.8026   | 0.8006   | 0.8244   | 0.8177   | 0.8204   | 0.8026   | 0.7711   |
| 41 | cg01637734 | 0.8071   | 0.8132   | 0.8224   | 0.7956   | 0.8049   | 0.8085   | 0.8024   | 0.8164   | 0.8024   | 0.7809   | 0.8147   | 0.7759   | 0.8367   | 0.7615   |

|    |            |        |        |        |        |        |        |        |        |        |        |        |        |        |        |
|----|------------|--------|--------|--------|--------|--------|--------|--------|--------|--------|--------|--------|--------|--------|--------|
| 42 | cg01714932 | 0.8295 | 0.8396 | 0.8521 | 0.8208 | 0.8606 | 0.8319 | 0.8561 | 0.8181 | 0.8106 | 0.8402 | 0.8305 | 0.8332 | 0.8429 | 0.8187 |
| 43 | cg01727899 | 0.6374 | 0.6734 | 0.6809 | 0.6835 | 0.6735 | 0.6551 | 0.6815 | 0.6833 | 0.6244 | 0.6185 | 0.5898 | 0.6198 | 0.6071 | 0.5409 |
| 44 | cg01747191 | 0.8697 | 0.8922 | 0.8935 | 0.8884 | 0.8910 | 0.8877 | 0.8785 | 0.8601 | 0.8874 | 0.8961 | 0.8845 | 0.8785 | 0.8898 | 0.8688 |
| 45 | cg01804844 | 0.8535 | 0.8505 | 0.8467 | 0.8130 | 0.8566 | 0.8281 | 0.8441 | 0.8453 | 0.8541 | 0.8587 | 0.8365 | 0.8527 | 0.8557 | 0.7550 |
| 46 | cg01843018 | 0.7968 | 0.8234 | 0.8347 | 0.8262 | 0.7993 | 0.8120 | 0.8003 | 0.7938 | 0.8215 | 0.8184 | 0.8428 | 0.8181 | 0.7991 | 0.7690 |
| 47 | cg01871995 | 0.7550 | 0.7424 | 0.7744 | 0.7350 | 0.7708 | 0.7544 | 0.7583 | 0.7535 | 0.7619 | 0.7601 | 0.7906 | 0.7535 | 0.8051 | 0.7125 |
| 48 | cg01888566 | 0.1332 | 0.0530 | 0.0485 | 0.0821 | 0.2268 | 0.5167 | 0.2306 | 0.1036 | 0.0522 | 0.3434 | 0.0778 | 0.2109 | 0.0446 | 0.0617 |
| 49 | cg01894895 | 0.8617 | 0.8746 | 0.8854 | 0.8664 | 0.8816 | 0.8700 | 0.8829 | 0.8769 | 0.8782 | 0.8704 | 0.8627 | 0.8739 | 0.8680 | 0.8597 |
| 50 | cg01939443 | 0.7751 | 0.8065 | 0.8200 | 0.7535 | 0.8085 | 0.8164 | 0.8296 | 0.7516 | 0.7799 | 0.7938 | 0.8024 | 0.7991 | 0.8120 | 0.7598 |
| 51 | cg02019333 | 0.7363 | 0.7231 | 0.6324 | 0.7356 | 0.6878 | 0.6096 | 0.6705 | 0.7109 | 0.7406 | 0.7570 | 0.6949 | 0.6201 | 0.7372 | 0.6254 |
| 52 | cg02039053 | 0.6633 | 0.7201 | 0.7073 | 0.6717 | 0.6592 | 0.7117 | 0.6797 | 0.6658 | 0.6954 | 0.7326 | 0.6844 | 0.6606 | 0.6856 | 0.6681 |
| 53 | cg02046532 | 0.7718 | 0.7873 | 0.7798 | 0.7977 | 0.7652 | 0.8067 | 0.7948 | 0.7247 | 0.7942 | 0.8058 | 0.7920 | 0.8093 | 0.8153 | 0.7524 |
| 54 | cg02082342 | 0.7255 | 0.7750 | 0.7415 | 0.8004 | 0.7638 | 0.7368 | 0.8167 | 0.8027 | 0.7722 | 0.7323 | 0.7733 | 0.7984 | 0.6991 | 0.8124 |
| 55 | cg02123547 | 0.0599 | 0.0662 | 0.0743 | 0.0543 | 0.0731 | 0.0516 | 0.0470 | 0.0521 | 0.0665 | 0.0719 | 0.1010 | 0.0703 | 0.0707 | 0.0701 |
| 56 | cg02218214 | 0.7923 | 0.7829 | 0.8192 | 0.8077 | 0.7910 | 0.7667 | 0.7773 | 0.7929 | 0.7999 | 0.7651 | 0.7659 | 0.7757 | 0.7582 | 0.7430 |
| 57 | cg02241259 | 0.8210 | 0.8096 | 0.8680 | 0.8239 | 0.8369 | 0.8297 | 0.8309 | 0.8444 | 0.8185 | 0.8278 | 0.8186 | 0.8092 | 0.8228 | 0.7699 |
| 58 | cg02248486 | 0.8094 | 0.7581 | 0.7919 | 0.8120 | 0.9176 | 0.8584 | 0.8484 | 0.8668 | 0.8368 | 0.8168 | 0.7518 | 0.8133 | 0.7763 | 0.7786 |
| 59 | cg02255732 | 0.6999 | 0.6953 | 0.7433 | 0.6964 | 0.7512 | 0.7247 | 0.7500 | 0.7058 | 0.7317 | 0.6933 | 0.7250 | 0.6874 | 0.7166 | 0.6823 |
| 60 | cg02288165 | 0.7201 | 0.7607 | 0.7055 | 0.7479 | 0.7636 | 0.7143 | 0.7437 | 0.7603 | 0.7522 | 0.7626 | 0.7597 | 0.7749 | 0.7579 | 0.7263 |
| 61 | cg02382666 | 0.8443 | 0.8557 | 0.8655 | 0.8531 | 0.8595 | 0.8481 | 0.8714 | 0.8601 | 0.8729 | 0.8585 | 0.8486 | 0.8542 | 0.8513 | 0.8335 |
| 62 | cg02475653 | 0.7538 | 0.8063 | 0.8187 | 0.7955 | 0.7953 | 0.7939 | 0.7366 | 0.8209 | 0.7780 | 0.7923 | 0.8072 | 0.7556 | 0.7880 | 0.7542 |
| 63 | cg02552945 | 0.7990 | 0.8365 | 0.8430 | 0.8287 | 0.8120 | 0.8350 | 0.8301 | 0.8233 | 0.8537 | 0.8190 | 0.8158 | 0.8038 | 0.8357 | 0.7717 |
| 64 | cg02620013 | 0.1931 | 0.2284 | 0.2002 | 0.1741 | 0.1779 | 0.2187 | 0.2185 | 0.1351 | 0.2107 | 0.2039 | 0.1991 | 0.2075 | 0.1996 | 0.1476 |
| 65 | cg02624129 | 0.2175 | 0.2818 | 0.1336 | 0.1202 | 0.2039 | 0.1990 | 0.2010 | 0.1718 | 0.2550 | 0.1644 | 0.1937 | 0.1639 | 0.2381 | 0.2402 |
| 66 | cg02629312 | 0.8925 | 0.8880 | 0.9117 | 0.9043 | 0.8987 | 0.9088 | 0.9014 | 0.9053 | 0.8924 | 0.9055 | 0.9015 | 0.8830 | 0.9024 | 0.8583 |
| 67 | cg02655623 | 0.7213 | 0.7542 | 0.7546 | 0.6939 | 0.7401 | 0.7443 | 0.7579 | 0.7225 | 0.7447 | 0.7744 | 0.7861 | 0.7417 | 0.7466 | 0.7044 |
| 68 | cg02710161 | 0.7388 | 0.8096 | 0.8209 | 0.7910 | 0.7823 | 0.8069 | 0.8141 | 0.7654 | 0.8117 | 0.8180 | 0.8147 | 0.8320 | 0.8256 | 0.6915 |
| 69 | cg02741177 | 0.6982 | 0.7835 | 0.7443 | 0.7455 | 0.7591 | 0.7280 | 0.7762 | 0.7601 | 0.7621 | 0.7563 | 0.7198 | 0.7410 | 0.7584 | 0.7029 |
| 70 | cg02774963 | 0.8686 | 0.8827 | 0.8793 | 0.8737 | 0.8796 | 0.8873 | 0.8881 | 0.8772 | 0.8784 | 0.8710 | 0.8757 | 0.8738 | 0.8818 | 0.8530 |
| 71 | cg02776251 | 0.0656 | 0.0976 | 0.1006 | 0.0802 | 0.0762 | 0.0628 | 0.0723 | 0.0677 | 0.0820 | 0.1026 | 0.0937 | 0.0839 | 0.1106 | 0.0693 |
| 72 | cg02800334 | 0.7165 | 0.7362 | 0.7754 | 0.7331 | 0.7481 | 0.7592 | 0.7646 | 0.7317 | 0.7354 | 0.7119 | 0.7220 | 0.7108 | 0.7547 | 0.6292 |
| 73 | cg02807450 | 0.0983 | 0.0788 | 0.0634 | 0.0910 | 0.0822 | 0.0755 | 0.0795 | 0.0934 | 0.0922 | 0.0950 | 0.1059 | 0.1043 | 0.0848 | 0.1292 |
| 74 | cg02833180 | 0.8166 | 0.8452 | 0.8743 | 0.8468 | 0.8679 | 0.8468 | 0.8622 | 0.8691 | 0.8685 | 0.8485 | 0.8675 | 0.8638 | 0.8587 | 0.8527 |
| 75 | cg02880679 | 0.8334 | 0.8202 | 0.8476 | 0.8308 | 0.8383 | 0.8429 | 0.8543 | 0.7934 | 0.8673 | 0.8326 | 0.8369 | 0.8291 | 0.8173 | 0.8095 |
| 76 | cg02906939 | 0.9118 | 0.9228 | 0.9302 | 0.9189 | 0.9264 | 0.9271 | 0.9276 | 0.9220 | 0.9281 | 0.9163 | 0.9235 | 0.9173 | 0.9037 | 0.9100 |
| 77 | cg02912041 | 0.8007 | 0.7658 | 0.7904 | 0.8060 | 0.8342 | 0.8154 | 0.7954 | 0.8226 | 0.8199 | 0.7858 | 0.8351 | 0.8108 | 0.7828 | 0.7836 |
| 78 | cg02936740 | 0.7326 | 0.7544 | 0.7816 | 0.7421 | 0.7699 | 0.7423 | 0.7722 | 0.7570 | 0.7616 | 0.7561 | 0.7544 | 0.7686 | 0.7759 | 0.7539 |
| 79 | cg03014680 | 0.7614 | 0.7774 | 0.7590 | 0.7486 | 0.7320 | 0.7708 | 0.7835 | 0.7899 | 0.7847 | 0.7099 | 0.7810 | 0.7889 | 0.7639 | 0.7465 |
| 80 | cg03017475 | 0.6966 | 0.7583 | 0.7180 | 0.7005 | 0.7087 | 0.7329 | 0.7199 | 0.6891 | 0.7296 | 0.7228 | 0.7140 | 0.7134 | 0.7056 | 0.6806 |
| 81 | cg03024246 | 0.8782 | 0.8936 | 0.8962 | 0.8787 | 0.8988 | 0.8913 | 0.8770 | 0.8889 | 0.8833 | 0.8771 | 0.8695 | 0.8579 | 0.8770 | 0.8341 |
| 82 | cg03032025 | 0.7933 | 0.8372 | 0.8271 | 0.8309 | 0.8332 | 0.8399 | 0.8349 | 0.8159 | 0.8337 | 0.8509 | 0.8395 | 0.8245 | 0.8361 | 0.7684 |
| 83 | cg03075662 | 0.8371 | 0.8466 | 0.8404 | 0.8360 | 0.8503 | 0.8467 | 0.8648 | 0.8340 | 0.8372 | 0.8418 | 0.8462 | 0.8351 | 0.8610 | 0.8025 |
| 84 | cg03082060 | 0.7229 | 0.7048 | 0.7281 | 0.7014 | 0.7224 | 0.7064 | 0.7491 | 0.7152 | 0.7106 | 0.6998 | 0.7184 | 0.6574 | 0.7475 | 0.6784 |
| 85 | cg03100040 | 0.2248 | 0.1632 | 0.1362 | 0.1777 | 0.1440 | 0.1286 | 0.1563 | 0.1407 | 0.1531 | 0.1730 | 0.1559 | 0.1954 | 0.1567 | 0.2242 |
| 86 | cg03251655 | 0.3999 | 0.2822 | 0.2667 | 0.4164 | 0.4364 | 0.3474 | 0.4001 | 0.2710 | 0.2915 | 0.2615 | 0.4393 | 0.4897 | 0.2445 | 0.2464 |
| 87 | cg03329572 | 0.8551 | 0.8648 | 0.8905 | 0.8724 | 0.8769 | 0.8733 | 0.8630 | 0.8584 | 0.8671 | 0.8579 | 0.8772 | 0.8509 | 0.8665 | 0.8301 |
| 88 | cg03338064 | 0.7851 | 0.8228 | 0.8669 | 0.8227 | 0.8366 | 0.8267 | 0.8586 | 0.8361 | 0.8280 | 0.8168 | 0.8120 | 0.8188 | 0.8086 | 0.7893 |
| 89 | cg03349251 | 0.8156 | 0.8097 | 0.8366 | 0.8199 | 0.7877 | 0.8061 | 0.8273 | 0.7872 | 0.8371 | 0.8285 | 0.8259 | 0.8068 | 0.7911 | 0.7562 |
| 90 | cg03349935 | 0.9084 | 0.8816 | 0.8945 | 0.9213 | 0.9066 | 0.9110 | 0.9093 | 0.9159 | 0.9015 | 0.8872 | 0.9010 | 0.9023 | 0.8954 | 0.9207 |
| 91 | cg03363283 | 0.7715 | 0.7869 | 0.7989 | 0.7799 | 0.8002 | 0.7756 | 0.7798 | 0.7911 | 0.8017 | 0.7759 | 0.7625 | 0.7566 | 0.7962 | 0.7537 |
| 92 | cg03382346 | 0.8386 | 0.8404 | 0.8661 | 0.8477 | 0.8601 | 0.8623 | 0.8638 | 0.8673 | 0.8666 | 0.8691 | 0.8768 | 0.8361 | 0.8540 | 0.7860 |
| 93 | cg03400060 | 0.5964 | 0.6309 | 0.6061 | 0.6149 | 0.6419 | 0.5327 | 0.5617 | 0.5208 | 0.5763 | 0.5551 | 0.4968 | 0.5630 | 0.6118 | 0.6028 |

|     |            |        |        |        |        |        |        |        |        |        |        |        |        |        |        |
|-----|------------|--------|--------|--------|--------|--------|--------|--------|--------|--------|--------|--------|--------|--------|--------|
| 94  | cg03498559 | 0.7515 | 0.7820 | 0.7752 | 0.7365 | 0.7582 | 0.7357 | 0.7863 | 0.7066 | 0.7622 | 0.7637 | 0.7652 | 0.7324 | 0.7642 | 0.6983 |
| 95  | cg03520136 | 0.8557 | 0.8718 | 0.8536 | 0.8445 | 0.8235 | 0.8700 | 0.8765 | 0.8605 | 0.8686 | 0.8684 | 0.8589 | 0.8850 | 0.8696 | 0.8466 |
| 96  | cg03535648 | 0.8375 | 0.8560 | 0.8679 | 0.8103 | 0.8657 | 0.8566 | 0.8401 | 0.8007 | 0.8414 | 0.8433 | 0.8512 | 0.8335 | 0.8514 | 0.7992 |
| 97  | cg03544379 | 0.7876 | 0.7669 | 0.8135 | 0.7928 | 0.8154 | 0.7608 | 0.8080 | 0.8097 | 0.7422 | 0.7620 | 0.7585 | 0.7610 | 0.7803 | 0.7993 |
| 98  | cg03552103 | 0.2401 | 0.2263 | 0.1255 | 0.2341 | 0.2831 | 0.1764 | 0.1574 | 0.1648 | 0.1548 | 0.3435 | 0.2620 | 0.2629 | 0.1961 | 0.1175 |
| 99  | cg03605761 | 0.8175 | 0.6678 | 0.7251 | 0.6968 | 0.6630 | 0.5992 | 0.7544 | 0.8365 | 0.8298 | 0.6455 | 0.7273 | 0.7710 | 0.7634 | 0.8332 |
| 100 | cg03660451 | 0.8424 | 0.8331 | 0.8449 | 0.8251 | 0.8294 | 0.8504 | 0.8499 | 0.8215 | 0.8279 | 0.8381 | 0.8403 | 0.8323 | 0.8399 | 0.8146 |
| 101 | cg03665785 | 0.7276 | 0.6959 | 0.7023 | 0.6662 | 0.7271 | 0.6599 | 0.6505 | 0.6579 | 0.6856 | 0.7571 | 0.6781 | 0.6667 | 0.7021 | 0.6755 |
| 102 | cg03704393 | 0.9194 | 0.8420 | 0.9221 | 0.9254 | 0.9213 | 0.9203 | 0.9168 | 0.9218 | 0.9044 | 0.8542 | 0.9149 | 0.9126 | 0.9105 | 0.9284 |
| 103 | cg03714397 | 0.8074 | 0.8458 | 0.8473 | 0.7967 | 0.8464 | 0.8223 | 0.8454 | 0.8415 | 0.8309 | 0.8467 | 0.8348 | 0.8283 | 0.8117 | 0.8117 |
| 104 | cg03723845 | 0.8847 | 0.8804 | 0.8871 | 0.9002 | 0.9136 | 0.9095 | 0.9124 | 0.9088 | 0.8831 | 0.8873 | 0.9052 | 0.8819 | 0.8900 | 0.8606 |
| 105 | cg03733371 | 0.6899 | 0.7311 | 0.6826 | 0.7133 | 0.7449 | 0.7128 | 0.6998 | 0.7345 | 0.7120 | 0.6905 | 0.7353 | 0.7339 | 0.7232 | 0.7129 |
| 106 | cg03743584 | 0.3569 | 0.4447 | 0.3231 | 0.4125 | 0.3547 | 0.3331 | 0.4460 | 0.4264 | 0.4029 | 0.4333 | 0.4431 | 0.4178 | 0.3790 | 0.2883 |
| 107 | cg03752087 | 0.8673 | 0.8803 | 0.8733 | 0.8663 | 0.8629 | 0.8708 | 0.8639 | 0.8781 | 0.8651 | 0.8698 | 0.8848 | 0.8824 | 0.8673 | 0.8508 |
| 108 | cg03752885 | 0.8458 | 0.8502 | 0.8833 | 0.8582 | 0.8794 | 0.8750 | 0.8860 | 0.8817 | 0.8617 | 0.8578 | 0.8791 | 0.8647 | 0.8380 | 0.8086 |
| 109 | cg03762535 | 0.7497 | 0.7506 | 0.7683 | 0.7470 | 0.7388 | 0.7722 | 0.7363 | 0.7281 | 0.7843 | 0.7843 | 0.8023 | 0.7443 | 0.7779 | 0.7177 |
| 110 | cg03764585 | 0.4706 | 0.3920 | 0.4212 | 0.3815 | 0.4958 | 0.4071 | 0.4716 | 0.5307 | 0.5367 | 0.4243 | 0.4948 | 0.4924 | 0.3895 | 0.3976 |
| 111 | cg03776060 | 0.3763 | 0.3889 | 0.2442 | 0.2843 | 0.3126 | 0.2845 | 0.3375 | 0.1904 | 0.2169 | 0.3640 | 0.2418 | 0.3362 | 0.3527 | 0.2700 |
| 112 | cg03835158 | 0.8981 | 0.9128 | 0.9182 | 0.9142 | 0.9163 | 0.9039 | 0.9178 | 0.9078 | 0.9043 | 0.8930 | 0.8953 | 0.8932 | 0.8972 | 0.8876 |
| 113 | cg03845435 | 0.8461 | 0.8637 | 0.8600 | 0.8358 | 0.8577 | 0.8577 | 0.8377 | 0.8495 | 0.8680 | 0.8359 | 0.8611 | 0.8423 | 0.8398 | 0.8228 |
| 114 | cg03887787 | 0.2409 | 0.4376 | 0.3159 | 0.3068 | 0.3329 | 0.4163 | 0.2859 | 0.2660 | 0.3441 | 0.4158 | 0.3231 | 0.3905 | 0.4722 | 0.3025 |
| 115 | cg03898365 | 0.4913 | 0.7645 | 0.5347 | 0.7393 | 0.6120 | 0.7443 | 0.6851 | 0.6891 | 0.5703 | 0.6126 | 0.6848 | 0.6763 | 0.6816 | 0.6762 |
| 116 | cg03914452 | 0.7112 | 0.7705 | 0.7513 | 0.7104 | 0.7672 | 0.7416 | 0.7370 | 0.7245 | 0.7738 | 0.7614 | 0.7323 | 0.7233 | 0.7708 | 0.7175 |
| 117 | cg03952109 | 0.6890 | 0.7477 | 0.7760 | 0.7175 | 0.7346 | 0.7314 | 0.7349 | 0.7357 | 0.7654 | 0.7615 | 0.7682 | 0.7275 | 0.7495 | 0.7155 |
| 118 | cg03964111 | 0.4418 | 0.2196 | 0.1703 | 0.1918 | 0.3396 | 0.2885 | 0.3353 | 0.2077 | 0.4827 | 0.2011 | 0.2522 | 0.2775 | 0.3290 | 0.2211 |
| 119 | cg04001802 | 0.7755 | 0.8175 | 0.7894 | 0.7712 | 0.7854 | 0.7630 | 0.8092 | 0.7661 | 0.8109 | 0.8107 | 0.7960 | 0.7989 | 0.8219 | 0.7398 |
| 120 | cg04019407 | 0.7956 | 0.7689 | 0.8495 | 0.7912 | 0.8459 | 0.8219 | 0.8736 | 0.8073 | 0.7828 | 0.7880 | 0.7770 | 0.8426 | 0.7391 | 0.8145 |
| 121 | cg04039225 | 0.7246 | 0.8035 | 0.8282 | 0.7800 | 0.7837 | 0.8043 | 0.8067 | 0.8252 | 0.8260 | 0.8009 | 0.8237 | 0.8092 | 0.8033 | 0.7395 |
| 122 | cg04058169 | 0.7854 | 0.7387 | 0.7366 | 0.7973 | 0.7583 | 0.7738 | 0.7967 | 0.7623 | 0.7701 | 0.7614 | 0.8063 | 0.8277 | 0.7686 | 0.7363 |
| 123 | cg04087608 | 0.8027 | 0.7941 | 0.7944 | 0.8180 | 0.8247 | 0.8133 | 0.7991 | 0.7888 | 0.7858 | 0.7668 | 0.8278 | 0.8123 | 0.7816 | 0.7851 |
| 124 | cg04143809 | 0.8594 | 0.8752 | 0.8805 | 0.8483 | 0.8773 | 0.8516 | 0.8646 | 0.8586 | 0.8562 | 0.8569 | 0.8448 | 0.8591 | 0.8605 | 0.8229 |
| 125 | cg04184278 | 0.8339 | 0.8406 | 0.8721 | 0.8389 | 0.8596 | 0.8369 | 0.8485 | 0.8517 | 0.8448 | 0.8644 | 0.8339 | 0.8391 | 0.8456 | 0.8203 |
| 126 | cg04201526 | 0.8565 | 0.8837 | 0.9015 | 0.8970 | 0.8865 | 0.8938 | 0.8916 | 0.8961 | 0.8862 | 0.8693 | 0.8871 | 0.8857 | 0.8836 | 0.8663 |
| 127 | cg04223956 | 0.8555 | 0.8610 | 0.9012 | 0.8962 | 0.8862 | 0.8898 | 0.8933 | 0.8665 | 0.8658 | 0.8934 | 0.8865 | 0.8797 | 0.8745 | 0.8696 |
| 128 | cg04265576 | 0.0970 | 0.1078 | 0.0744 | 0.1091 | 0.2300 | 0.0735 | 0.1295 | 0.1913 | 0.1120 | 0.1359 | 0.1010 | 0.1063 | 0.0791 | 0.0705 |
| 129 | cg04281204 | 0.7184 | 0.7829 | 0.7836 | 0.7481 | 0.7496 | 0.7944 | 0.7705 | 0.7456 | 0.7649 | 0.7729 | 0.7574 | 0.7635 | 0.7726 | 0.6845 |
| 130 | cg04282622 | 0.7159 | 0.7519 | 0.7724 | 0.7319 | 0.7740 | 0.7386 | 0.7581 | 0.7768 | 0.7482 | 0.7499 | 0.7165 | 0.7165 | 0.7617 | 0.6487 |
| 131 | cg04298323 | 0.7117 | 0.7644 | 0.7515 | 0.7201 | 0.7634 | 0.7311 | 0.7714 | 0.7619 | 0.7497 | 0.7186 | 0.7389 | 0.7400 | 0.7722 | 0.7130 |
| 132 | cg04336379 | 0.2439 | 0.1767 | 0.1299 | 0.1470 | 0.2254 | 0.1398 | 0.1515 | 0.1443 | 0.1271 | 0.1822 | 0.1557 | 0.1652 | 0.1899 | 0.1857 |
| 133 | cg04341806 | 0.7156 | 0.7334 | 0.7577 | 0.7828 | 0.7630 | 0.7791 | 0.7490 | 0.6712 | 0.7788 | 0.7255 | 0.7545 | 0.7666 | 0.7877 | 0.6992 |
| 134 | cg04353483 | 0.8161 | 0.8303 | 0.8403 | 0.8138 | 0.8379 | 0.8228 | 0.8127 | 0.8396 | 0.8257 | 0.8450 | 0.8076 | 0.8171 | 0.8218 | 0.7772 |
| 135 | cg04439215 | 0.8164 | 0.8456 | 0.8584 | 0.8330 | 0.8385 | 0.8340 | 0.8311 | 0.8606 | 0.8557 | 0.8588 | 0.8478 | 0.8599 | 0.8323 | 0.8027 |
| 136 | cg04485603 | 0.8870 | 0.8844 | 0.8915 | 0.8895 | 0.8838 | 0.8959 | 0.9001 | 0.8997 | 0.8904 | 0.8910 | 0.8960 | 0.8794 | 0.8914 | 0.8660 |
| 137 | cg04513422 | 0.4344 | 0.2076 | 0.1688 | 0.2035 | 0.2472 | 0.2232 | 0.2819 | 0.1300 | 0.2576 | 0.3235 | 0.3435 | 0.3513 | 0.4804 | 0.2125 |
| 138 | cg04527989 | 0.7026 | 0.7288 | 0.7166 | 0.7067 | 0.7342 | 0.7199 | 0.7308 | 0.6639 | 0.7675 | 0.7014 | 0.7788 | 0.7549 | 0.7482 | 0.7008 |
| 139 | cg04545516 | 0.7492 | 0.7020 | 0.7477 | 0.7367 | 0.7501 | 0.7291 | 0.7779 | 0.7790 | 0.7626 | 0.6998 | 0.6649 | 0.7306 | 0.7699 | 0.7102 |
| 140 | cg04570669 | 0.7215 | 0.7506 | 0.7477 | 0.7183 | 0.7410 | 0.7061 | 0.7552 | 0.7212 | 0.7272 | 0.7197 | 0.7150 | 0.7127 | 0.7255 | 0.7019 |
| 141 | cg04616566 | 0.8683 | 0.8788 | 0.8317 | 0.8800 | 0.8961 | 0.8903 | 0.8936 | 0.8829 | 0.8750 | 0.8724 | 0.8823 | 0.8760 | 0.8676 | 0.8732 |
| 142 | cg04645174 | 0.8409 | 0.8446 | 0.8615 | 0.8387 | 0.8540 | 0.8429 | 0.8494 | 0.8741 | 0.8568 | 0.8380 | 0.8435 | 0.8382 | 0.8322 | 0.8284 |
| 143 | cg04705866 | 0.7881 | 0.8062 | 0.8229 | 0.8041 | 0.8275 | 0.8173 | 0.8090 | 0.7590 | 0.8240 | 0.7999 | 0.8125 | 0.8300 | 0.8198 | 0.7709 |
| 144 | cg04739570 | 0.1589 | 0.1908 | 0.1056 | 0.2394 | 0.1918 | 0.1195 | 0.1935 | 0.1776 | 0.1927 | 0.1736 | 0.1819 | 0.2379 | 0.1787 | 0.1866 |
| 145 | cg04748010 | 0.8584 | 0.8693 | 0.8675 | 0.8817 | 0.8585 | 0.8758 | 0.8659 | 0.8758 | 0.8799 | 0.8845 | 0.8585 | 0.8687 | 0.8771 | 0.8429 |

|     |            |        |        |        |        |        |        |        |        |        |        |        |        |        |        |
|-----|------------|--------|--------|--------|--------|--------|--------|--------|--------|--------|--------|--------|--------|--------|--------|
| 146 | cg04762213 | 0.1708 | 0.0912 | 0.1260 | 0.1466 | 0.0817 | 0.1238 | 0.1570 | 0.1062 | 0.0923 | 0.0797 | 0.0693 | 0.0824 | 0.0930 | 0.0995 |
| 147 | cg04794887 | 0.0400 | 0.0562 | 0.0741 | 0.0509 | 0.0447 | 0.0397 | 0.0596 | 0.0372 | 0.0551 | 0.0722 | 0.0731 | 0.0714 | 0.0475 | 0.0305 |
| 148 | cg04891836 | 0.5225 | 0.5179 | 0.4748 | 0.4314 | 0.5272 | 0.4289 | 0.5592 | 0.4803 | 0.4931 | 0.5367 | 0.5406 | 0.4591 | 0.5819 | 0.5538 |
| 149 | cg04902405 | 0.8425 | 0.8541 | 0.8789 | 0.8610 | 0.8677 | 0.8698 | 0.8686 | 0.8486 | 0.8553 | 0.8678 | 0.8701 | 0.8426 | 0.8520 | 0.8526 |
| 150 | cg04979933 | 0.8542 | 0.8799 | 0.8757 | 0.8556 | 0.8821 | 0.8466 | 0.8725 | 0.8501 | 0.8745 | 0.8595 | 0.8625 | 0.8758 | 0.8699 | 0.8564 |
| 151 | cg04987894 | 0.0655 | 0.3656 | 0.1212 | 0.1340 | 0.6343 | 0.5688 | 0.1464 | 0.3553 | 0.4096 | 0.4617 | 0.1690 | 0.4308 | 0.2092 | 0.0989 |
| 152 | cg05088386 | 0.8363 | 0.8626 | 0.8530 | 0.8452 | 0.8679 | 0.8599 | 0.8458 | 0.7909 | 0.8336 | 0.8319 | 0.8377 | 0.8499 | 0.8279 | 0.8109 |
| 153 | cg05126264 | 0.8948 | 0.9076 | 0.9178 | 0.9054 | 0.9097 | 0.8960 | 0.9093 | 0.9007 | 0.8863 | 0.8944 | 0.8939 | 0.8842 | 0.8948 | 0.8648 |
| 154 | cg05193832 | 0.8197 | 0.8413 | 0.8509 | 0.8332 | 0.8630 | 0.8499 | 0.8419 | 0.8523 | 0.8500 | 0.8501 | 0.8295 | 0.8426 | 0.8220 | 0.8263 |
| 155 | cg05333568 | 0.3995 | 0.4046 | 0.4115 | 0.3767 | 0.2981 | 0.4074 | 0.6036 | 0.3862 | 0.3738 | 0.4394 | 0.4140 | 0.3804 | 0.4461 | 0.3595 |
| 156 | cg05341115 | 0.7488 | 0.7865 | 0.7852 | 0.7205 | 0.7746 | 0.7801 | 0.7904 | 0.7965 | 0.7707 | 0.7947 | 0.7849 | 0.7899 | 0.7935 | 0.7644 |
| 157 | cg05343453 | 0.8652 | 0.8470 | 0.8515 | 0.8732 | 0.8576 | 0.8580 | 0.8749 | 0.8580 | 0.8557 | 0.8486 | 0.8568 | 0.8595 | 0.8523 | 0.8338 |
| 158 | cg05348123 | 0.8238 | 0.8468 | 0.8416 | 0.8201 | 0.8530 | 0.8443 | 0.8343 | 0.8295 | 0.8494 | 0.8551 | 0.8588 | 0.8555 | 0.8338 | 0.8425 |
| 159 | cg05376954 | 0.6370 | 0.7166 | 0.6570 | 0.6285 | 0.6683 | 0.6308 | 0.7016 | 0.6731 | 0.6866 | 0.6580 | 0.7094 | 0.7144 | 0.6932 | 0.6584 |
| 160 | cg05379350 | 0.2204 | 0.2788 | 0.2920 | 0.2942 | 0.3051 | 0.2404 | 0.3042 | 0.2642 | 0.2595 | 0.2324 | 0.2931 | 0.2574 | 0.2392 | 0.2318 |
| 161 | cg05389024 | 0.7068 | 0.7070 | 0.7858 | 0.7225 | 0.7409 | 0.7488 | 0.7377 | 0.7095 | 0.7764 | 0.7531 | 0.7451 | 0.7651 | 0.7588 | 0.6842 |
| 162 | cg05412531 | 0.8495 | 0.8538 | 0.8948 | 0.8712 | 0.8858 | 0.8868 | 0.8980 | 0.8850 | 0.8624 | 0.8541 | 0.8640 | 0.8694 | 0.8778 | 0.8439 |
| 163 | cg05511685 | 0.8286 | 0.8199 | 0.8465 | 0.8170 | 0.8302 | 0.7990 | 0.8374 | 0.8089 | 0.8350 | 0.8597 | 0.8269 | 0.8141 | 0.7909 | 0.7630 |
| 164 | cg05520656 | 0.0619 | 0.1821 | 0.0491 | 0.1019 | 0.0460 | 0.0501 | 0.0564 | 0.0567 | 0.0666 | 0.1382 | 0.0766 | 0.0882 | 0.0691 | 0.0724 |
| 165 | cg05564266 | 0.8718 | 0.8080 | 0.8714 | 0.8781 | 0.8612 | 0.8622 | 0.8596 | 0.8648 | 0.8176 | 0.8490 | 0.7983 | 0.7968 | 0.8024 | 0.7901 |
| 166 | cg05585544 | 0.8265 | 0.8519 | 0.8457 | 0.8590 | 0.8329 | 0.8221 | 0.8447 | 0.8238 | 0.8635 | 0.8402 | 0.8499 | 0.8489 | 0.8363 | 0.8222 |
| 167 | cg05592434 | 0.2982 | 0.3681 | 0.3556 | 0.2550 | 0.3474 | 0.3316 | 0.3402 | 0.3142 | 0.3746 | 0.3715 | 0.3726 | 0.3668 | 0.3681 | 0.2988 |
| 168 | cg05624196 | 0.8072 | 0.8181 | 0.8303 | 0.7992 | 0.7854 | 0.8321 | 0.8470 | 0.8140 | 0.8208 | 0.8160 | 0.8209 | 0.7874 | 0.8237 | 0.7794 |
| 169 | cg05696092 | 0.6739 | 0.5304 | 0.6140 | 0.5909 | 0.6358 | 0.6295 | 0.6858 | 0.5142 | 0.5851 | 0.6018 | 0.5700 | 0.6471 | 0.6471 | 0.6630 |
| 170 | cg05721199 | 0.7207 | 0.7010 | 0.7674 | 0.7030 | 0.7454 | 0.7422 | 0.7338 | 0.7328 | 0.7628 | 0.7282 | 0.7098 | 0.7114 | 0.7305 | 0.6842 |
| 171 | cg05744229 | 0.7674 | 0.7933 | 0.7591 | 0.7532 | 0.7747 | 0.7706 | 0.7805 | 0.7767 | 0.7919 | 0.7730 | 0.8060 | 0.7257 | 0.7662 | 0.7271 |
| 172 | cg05755779 | 0.8395 | 0.8197 | 0.8359 | 0.8432 | 0.8585 | 0.8350 | 0.8366 | 0.8435 | 0.8301 | 0.8107 | 0.8171 | 0.8035 | 0.8167 | 0.8129 |
| 173 | cg05761971 | 0.7426 | 0.8054 | 0.7853 | 0.7676 | 0.7883 | 0.7745 | 0.8103 | 0.7887 | 0.8098 | 0.7707 | 0.7670 | 0.7892 | 0.8228 | 0.7589 |
| 174 | cg05779068 | 0.8439 | 0.8124 | 0.8523 | 0.8233 | 0.8281 | 0.8051 | 0.8392 | 0.8285 | 0.8353 | 0.7783 | 0.8111 | 0.8203 | 0.8234 | 0.8261 |
| 175 | cg05822532 | 0.4639 | 0.5289 | 0.3829 | 0.4172 | 0.5518 | 0.4639 | 0.5995 | 0.5635 | 0.4226 | 0.4747 | 0.5259 | 0.5737 | 0.4701 | 0.4663 |
| 176 | cg05824215 | 0.7212 | 0.7055 | 0.7370 | 0.6971 | 0.7550 | 0.7615 | 0.7507 | 0.7580 | 0.7330 | 0.6932 | 0.7531 | 0.7330 | 0.7802 | 0.7671 |
| 177 | cg05863612 | 0.8343 | 0.8669 | 0.8680 | 0.8540 | 0.8458 | 0.8637 | 0.8686 | 0.8414 | 0.8550 | 0.8697 | 0.8646 | 0.8435 | 0.8390 | 0.7860 |
| 178 | cg05936800 | 0.7513 | 0.7937 | 0.8193 | 0.7736 | 0.7649 | 0.7892 | 0.7746 | 0.7956 | 0.7982 | 0.7903 | 0.7801 | 0.7579 | 0.7682 | 0.7395 |
| 179 | cg05960024 | 0.8903 | 0.8896 | 0.9044 | 0.8967 | 0.8977 | 0.9038 | 0.9025 | 0.8966 | 0.9033 | 0.8991 | 0.8919 | 0.8816 | 0.8836 | 0.8940 |
| 180 | cg05965188 | 0.8045 | 0.8236 | 0.8068 | 0.8215 | 0.8169 | 0.8071 | 0.7990 | 0.8152 | 0.7966 | 0.7985 | 0.8082 | 0.8267 | 0.8106 | 0.7782 |
| 181 | cg05968233 | 0.2849 | 0.3064 | 0.1538 | 0.3646 | 0.2897 | 0.1886 | 0.3114 | 0.3390 | 0.3805 | 0.3090 | 0.3460 | 0.3832 | 0.3976 | 0.1962 |
| 182 | cg05998244 | 0.7312 | 0.7848 | 0.8346 | 0.7960 | 0.8139 | 0.7831 | 0.7989 | 0.8403 | 0.7740 | 0.7891 | 0.7722 | 0.7807 | 0.7973 | 0.7590 |
| 183 | cg05998983 | 0.7559 | 0.8108 | 0.8116 | 0.8068 | 0.8097 | 0.8025 | 0.8186 | 0.7977 | 0.8102 | 0.7998 | 0.8152 | 0.8103 | 0.8382 | 0.7734 |
| 184 | cg06021171 | 0.6533 | 0.6742 | 0.7211 | 0.6871 | 0.6968 | 0.6611 | 0.6873 | 0.6951 | 0.7043 | 0.6802 | 0.7005 | 0.6783 | 0.6732 | 0.6396 |
| 185 | cg06098051 | 0.8312 | 0.8246 | 0.8571 | 0.8375 | 0.8530 | 0.8312 | 0.8270 | 0.8511 | 0.8540 | 0.8379 | 0.8291 | 0.8126 | 0.8239 | 0.8129 |
| 186 | cg06140118 | 0.0189 | 0.0435 | 0.0300 | 0.0215 | 0.0282 | 0.0249 | 0.0184 | 0.0292 | 0.0391 | 0.0255 | 0.0480 | 0.0256 | 0.0273 | 0.0168 |
| 187 | cg06210526 | 0.5177 | 0.5498 | 0.8964 | 0.5515 | 0.9008 | 0.8935 | 0.8963 | 0.9052 | 0.8940 | 0.9032 | 0.9029 | 0.9030 | 0.5196 | 0.9028 |
| 188 | cg06213598 | 0.7635 | 0.7862 | 0.8150 | 0.7787 | 0.8004 | 0.7861 | 0.7854 | 0.7728 | 0.7676 | 0.7653 | 0.8236 | 0.7860 | 0.7939 | 0.6914 |
| 189 | cg06233985 | 0.7756 | 0.7894 | 0.7832 | 0.7757 | 0.7812 | 0.7872 | 0.7986 | 0.7612 | 0.7800 | 0.7745 | 0.7870 | 0.7754 | 0.7798 | 0.7764 |
| 190 | cg06244634 | 0.7804 | 0.8061 | 0.8154 | 0.7969 | 0.8154 | 0.7994 | 0.8117 | 0.7912 | 0.7881 | 0.8059 | 0.8069 | 0.8205 | 0.7990 | 0.7709 |
| 191 | cg06268694 | 0.0960 | 0.1051 | 0.0664 | 0.0935 | 0.1067 | 0.0790 | 0.0977 | 0.0747 | 0.0699 | 0.1238 | 0.1125 | 0.1033 | 0.0835 | 0.0868 |
| 192 | cg06290168 | 0.0438 | 0.0527 | 0.0415 | 0.0317 | 0.0616 | 0.0571 | 0.0491 | 0.0340 | 0.0475 | 0.0316 | 0.0436 | 0.0362 | 0.0384 | 0.0253 |
| 193 | cg06353345 | 0.7749 | 0.7924 | 0.7884 | 0.7866 | 0.7915 | 0.7902 | 0.7908 | 0.7823 | 0.8092 | 0.7965 | 0.8041 | 0.8032 | 0.7908 | 0.7723 |
| 194 | cg06399881 | 0.7649 | 0.8055 | 0.7945 | 0.7847 | 0.7885 | 0.7887 | 0.7874 | 0.7809 | 0.7855 | 0.8104 | 0.8097 | 0.7665 | 0.8025 | 0.7636 |
| 195 | cg06425515 | 0.7198 | 0.7406 | 0.7373 | 0.6866 | 0.7501 | 0.6844 | 0.7136 | 0.7311 | 0.7326 | 0.7527 | 0.6917 | 0.7228 | 0.7310 | 0.6426 |
| 196 | cg06479216 | 0.6570 | 0.7445 | 0.7865 | 0.7296 | 0.7512 | 0.7240 | 0.7571 | 0.7273 | 0.7498 | 0.7432 | 0.7520 | 0.7436 | 0.7432 | 0.7006 |
| 197 | cg06488505 | 0.7971 | 0.8236 | 0.8397 | 0.8088 | 0.8328 | 0.8127 | 0.8378 | 0.7976 | 0.8178 | 0.8287 | 0.8108 | 0.7955 | 0.8301 | 0.7870 |

|     |            |        |        |        |        |        |        |        |        |        |        |        |        |        |        |
|-----|------------|--------|--------|--------|--------|--------|--------|--------|--------|--------|--------|--------|--------|--------|--------|
| 198 | cg06496654 | 0.7649 | 0.7834 | 0.8183 | 0.7734 | 0.7978 | 0.7957 | 0.7919 | 0.8079 | 0.7832 | 0.7764 | 0.7822 | 0.7792 | 0.7840 | 0.8004 |
| 199 | cg06545504 | 0.8306 | 0.8323 | 0.8611 | 0.8537 | 0.8556 | 0.8211 | 0.8306 | 0.8046 | 0.8370 | 0.8431 | 0.8285 | 0.8370 | 0.8235 | 0.8315 |
| 200 | cg06585893 | 0.5328 | 0.4950 | 0.5445 | 0.5743 | 0.6263 | 0.5460 | 0.6021 | 0.6443 | 0.6345 | 0.6297 | 0.6062 | 0.5940 | 0.5277 | 0.5505 |
| 201 | cg06638451 | 0.7575 | 0.6921 | 0.7006 | 0.7248 | 0.7922 | 0.7421 | 0.7727 | 0.7679 | 0.6353 | 0.7803 | 0.6884 | 0.7460 | 0.7513 | 0.7517 |
| 202 | cg06643227 | 0.8172 | 0.7695 | 0.7954 | 0.8410 | 0.8574 | 0.8273 | 0.8085 | 0.8507 | 0.8250 | 0.7908 | 0.7694 | 0.7197 | 0.7477 | 0.8104 |
| 203 | cg06730286 | 0.8388 | 0.8980 | 0.8926 | 0.8598 | 0.8756 | 0.8748 | 0.8726 | 0.8457 | 0.8922 | 0.8909 | 0.9019 | 0.8661 | 0.8959 | 0.8348 |
| 204 | cg06750167 | 0.4750 | 0.4926 | 0.5944 | 0.4074 | 0.6323 | 0.4108 | 0.6244 | 0.6319 | 0.4979 | 0.5476 | 0.4931 | 0.5573 | 0.5238 | 0.5259 |
| 205 | cg06757810 | 0.8329 | 0.8260 | 0.8686 | 0.8264 | 0.8378 | 0.8534 | 0.8177 | 0.8526 | 0.8380 | 0.8447 | 0.8462 | 0.8471 | 0.8406 | 0.8224 |
| 206 | cg06790275 | 0.0331 | 0.0538 | 0.0355 | 0.0297 | 0.0352 | 0.0298 | 0.0292 | 0.0269 | 0.0522 | 0.0588 | 0.0450 | 0.0633 | 0.0566 | 0.0296 |
| 207 | cg06798189 | 0.7388 | 0.7599 | 0.8085 | 0.7607 | 0.7616 | 0.7684 | 0.7965 | 0.7605 | 0.7676 | 0.7541 | 0.7661 | 0.7194 | 0.7673 | 0.7132 |
| 208 | cg06840801 | 0.8338 | 0.8487 | 0.8614 | 0.8558 | 0.8335 | 0.8450 | 0.8400 | 0.8667 | 0.8411 | 0.8273 | 0.8718 | 0.8695 | 0.8588 | 0.8415 |
| 209 | cg06908474 | 0.0289 | 0.0963 | 0.0249 | 0.0241 | 0.0726 | 0.0844 | 0.1818 | 0.0304 | 0.0376 | 0.0335 | 0.0646 | 0.0521 | 0.1020 | 0.0758 |
| 210 | cg06933072 | 0.8794 | 0.8801 | 0.8960 | 0.8703 | 0.8887 | 0.8792 | 0.8760 | 0.8770 | 0.8891 | 0.8748 | 0.8717 | 0.8864 | 0.8813 | 0.8318 |
| 211 | cg07039113 | 0.8682 | 0.8658 | 0.8720 | 0.8673 | 0.8738 | 0.8628 | 0.8792 | 0.8794 | 0.8766 | 0.8684 | 0.8704 | 0.8741 | 0.8716 | 0.8812 |
| 212 | cg07044282 | 0.7213 | 0.7237 | 0.7322 | 0.7592 | 0.7939 | 0.7126 | 0.7529 | 0.7577 | 0.7271 | 0.7097 | 0.7391 | 0.7907 | 0.7150 | 0.7431 |
| 213 | cg07103493 | 0.1073 | 0.0894 | 0.1027 | 0.0798 | 0.1404 | 0.0620 | 0.2139 | 0.1068 | 0.0998 | 0.1289 | 0.0966 | 0.1018 | 0.1014 | 0.0686 |
| 214 | cg07136161 | 0.7641 | 0.7612 | 0.8126 | 0.8034 | 0.8042 | 0.7895 | 0.7846 | 0.7759 | 0.8238 | 0.7741 | 0.8191 | 0.7733 | 0.7667 | 0.7595 |
| 215 | cg07136254 | 0.8067 | 0.8391 | 0.8323 | 0.8223 | 0.8304 | 0.8373 | 0.8084 | 0.8051 | 0.8479 | 0.8315 | 0.8274 | 0.8477 | 0.8346 | 0.7707 |
| 216 | cg07153965 | 0.8015 | 0.7724 | 0.8181 | 0.7975 | 0.8412 | 0.8193 | 0.8394 | 0.7752 | 0.7979 | 0.8081 | 0.8278 | 0.7972 | 0.8047 | 0.7831 |
| 217 | cg07204803 | 0.7678 | 0.7614 | 0.8095 | 0.7539 | 0.7918 | 0.8013 | 0.7979 | 0.7724 | 0.7522 | 0.7525 | 0.7832 | 0.7786 | 0.7533 | 0.6972 |
| 218 | cg07232688 | 0.7339 | 0.7986 | 0.8209 | 0.7809 | 0.7843 | 0.7938 | 0.8033 | 0.7701 | 0.7823 | 0.7817 | 0.7960 | 0.7707 | 0.7863 | 0.7124 |
| 219 | cg07236769 | 0.7849 | 0.7927 | 0.7830 | 0.7394 | 0.7765 | 0.7960 | 0.7753 | 0.7436 | 0.8013 | 0.7961 | 0.7983 | 0.7903 | 0.7885 | 0.7130 |
| 220 | cg07292816 | 0.8193 | 0.8229 | 0.8392 | 0.8313 | 0.8378 | 0.8401 | 0.8405 | 0.8366 | 0.8374 | 0.8263 | 0.8379 | 0.8347 | 0.8365 | 0.7970 |
| 221 | cg07327347 | 0.8158 | 0.8276 | 0.8368 | 0.8112 | 0.8129 | 0.4186 | 0.8168 | 0.7912 | 0.8296 | 0.7924 | 0.8033 | 0.8265 | 0.8423 | 0.8371 |
| 222 | cg07338205 | 0.8182 | 0.8297 | 0.8348 | 0.8376 | 0.8178 | 0.8008 | 0.8314 | 0.8045 | 0.8422 | 0.8520 | 0.8447 | 0.8267 | 0.8222 | 0.8094 |
| 223 | cg07363637 | 0.7040 | 0.6800 | 0.7179 | 0.6426 | 0.7373 | 0.6628 | 0.6880 | 0.8308 | 0.7931 | 0.6794 | 0.7197 | 0.7937 | 0.7129 | 0.7198 |
| 224 | cg07366967 | 0.8126 | 0.8335 | 0.8369 | 0.8390 | 0.8418 | 0.8399 | 0.8496 | 0.8561 | 0.8314 | 0.8300 | 0.8384 | 0.8409 | 0.8171 | 0.8324 |
| 225 | cg07403350 | 0.5884 | 0.5378 | 0.6326 | 0.5965 | 0.6998 | 0.5691 | 0.6016 | 0.5627 | 0.5849 | 0.4823 | 0.4313 | 0.5761 | 0.7063 | 0.6533 |
| 226 | cg07455279 | 0.2586 | 0.2472 | 0.2044 | 0.3588 | 0.2363 | 0.3299 | 0.2087 | 0.2625 | 0.2591 | 0.2066 | 0.2482 | 0.2957 | 0.2185 | 0.2553 |
| 227 | cg07459489 | 0.8593 | 0.8734 | 0.8793 | 0.8656 | 0.8745 | 0.8641 | 0.8517 | 0.8638 | 0.8681 | 0.8542 | 0.8589 | 0.8446 | 0.8590 | 0.8340 |
| 228 | cg07465609 | 0.7945 | 0.8216 | 0.8200 | 0.7968 | 0.8248 | 0.8222 | 0.8230 | 0.8047 | 0.8205 | 0.8149 | 0.8401 | 0.7924 | 0.8114 | 0.7771 |
| 229 | cg07472159 | 0.7383 | 0.7734 | 0.7926 | 0.7445 | 0.7432 | 0.7655 | 0.7734 | 0.7728 | 0.7785 | 0.7757 | 0.7636 | 0.7770 | 0.7674 | 0.7435 |
| 230 | cg07476030 | 0.8037 | 0.8401 | 0.7990 | 0.8058 | 0.8341 | 0.8156 | 0.8129 | 0.8020 | 0.8269 | 0.8426 | 0.8368 | 0.8271 | 0.8321 | 0.8079 |
| 231 | cg07504718 | 0.7247 | 0.7343 | 0.7552 | 0.7624 | 0.7434 | 0.7294 | 0.7683 | 0.7161 | 0.7726 | 0.7695 | 0.7712 | 0.7239 | 0.7584 | 0.7427 |
| 232 | cg07543883 | 0.5287 | 0.5979 | 0.5587 | 0.5610 | 0.5509 | 0.6172 | 0.6582 | 0.5354 | 0.5692 | 0.6028 | 0.5800 | 0.5545 | 0.6325 | 0.6305 |
| 233 | cg07613278 | 0.2507 | 0.2348 | 0.1872 | 0.2704 | 0.1815 | 0.1912 | 0.2133 | 0.2088 | 0.2329 | 0.2343 | 0.2941 | 0.2589 | 0.2339 | 0.2456 |
| 234 | cg07689731 | 0.6883 | 0.7267 | 0.7417 | 0.7127 | 0.7226 | 0.6942 | 0.7348 | 0.7179 | 0.7551 | 0.6842 | 0.7672 | 0.7329 | 0.7260 | 0.6871 |
| 235 | cg07732644 | 0.7419 | 0.7782 | 0.8177 | 0.7651 | 0.8076 | 0.7904 | 0.8219 | 0.7944 | 0.7960 | 0.8020 | 0.7996 | 0.8206 | 0.7878 | 0.7414 |
| 236 | cg07747299 | 0.1401 | 0.4577 | 0.2912 | 0.1835 | 0.6387 | 0.4532 | 0.4057 | 0.1001 | 0.0940 | 0.3187 | 0.5313 | 0.2161 | 0.2487 | 0.1321 |
| 237 | cg07789904 | 0.0400 | 0.0489 | 0.0361 | 0.0412 | 0.0383 | 0.0343 | 0.0394 | 0.0424 | 0.0490 | 0.0500 | 0.0472 | 0.0564 | 0.0472 | 0.0428 |
| 238 | cg07803864 | 0.7408 | 0.7887 | 0.7896 | 0.7509 | 0.7605 | 0.7849 | 0.7803 | 0.7819 | 0.7861 | 0.7666 | 0.8038 | 0.7748 | 0.7591 | 0.6921 |
| 239 | cg07829809 | 0.7272 | 0.7899 | 0.7795 | 0.7712 | 0.7931 | 0.7819 | 0.7739 | 0.7596 | 0.7538 | 0.7758 | 0.7523 | 0.7734 | 0.7838 | 0.7133 |
| 240 | cg07880854 | 0.5688 | 0.4712 | 0.4894 | 0.4795 | 0.6025 | 0.5073 | 0.5306 | 0.6118 | 0.5770 | 0.4548 | 0.5262 | 0.5440 | 0.5316 | 0.4731 |
| 241 | cg07942995 | 0.7463 | 0.7299 | 0.7986 | 0.7212 | 0.7853 | 0.7853 | 0.8065 | 0.7513 | 0.7423 | 0.6757 | 0.7389 | 0.7406 | 0.7434 | 0.6563 |
| 242 | cg07950803 | 0.8361 | 0.8058 | 0.8734 | 0.8192 | 0.8567 | 0.7774 | 0.8294 | 0.8476 | 0.8405 | 0.8531 | 0.8448 | 0.7677 | 0.7565 | 0.8796 |
| 243 | cg07974891 | 0.7410 | 0.7801 | 0.7821 | 0.7549 | 0.7743 | 0.7655 | 0.7864 | 0.7894 | 0.7591 | 0.7457 | 0.7888 | 0.7819 | 0.7735 | 0.7058 |
| 244 | cg07981495 | 0.8619 | 0.8696 | 0.8833 | 0.8476 | 0.8818 | 0.8850 | 0.8783 | 0.8644 | 0.8554 | 0.8620 | 0.8657 | 0.8646 | 0.8629 | 0.8343 |
| 245 | cg07991621 | 0.5500 | 0.1740 | 0.1462 | 0.5204 | 0.4217 | 0.1225 | 0.2114 | 0.1526 | 0.2205 | 0.2702 | 0.3714 | 0.2908 | 0.2134 | 0.5215 |
| 246 | cg08046471 | 0.8402 | 0.8096 | 0.8568 | 0.8661 | 0.8676 | 0.8509 | 0.8454 | 0.8676 | 0.8236 | 0.8206 | 0.8222 | 0.8004 | 0.8187 | 0.8342 |
| 247 | cg08067268 | 0.1578 | 0.1415 | 0.1179 | 0.1813 | 0.1747 | 0.1151 | 0.1809 | 0.1136 | 0.1847 | 0.1336 | 0.2060 | 0.2155 | 0.2910 | 0.2404 |
| 248 | cg08088390 | 0.7175 | 0.7406 | 0.6624 | 0.7651 | 0.7248 | 0.7272 | 0.6558 | 0.6898 | 0.6805 | 0.6875 | 0.6634 | 0.6867 | 0.7397 | 0.7322 |
| 249 | cg08096038 | 0.8634 | 0.8481 | 0.8705 | 0.8455 | 0.8536 | 0.8438 | 0.8453 | 0.8719 | 0.8550 | 0.8560 | 0.8131 | 0.8341 | 0.8329 | 0.8007 |

|     |            |        |        |        |        |        |        |        |        |        |        |        |        |        |        |
|-----|------------|--------|--------|--------|--------|--------|--------|--------|--------|--------|--------|--------|--------|--------|--------|
| 250 | cg08099701 | 0.8068 | 0.8494 | 0.8495 | 0.8119 | 0.8278 | 0.8349 | 0.8246 | 0.8053 | 0.8367 | 0.8261 | 0.8274 | 0.8326 | 0.8010 | 0.7673 |
| 251 | cg08113203 | 0.7641 | 0.8203 | 0.8119 | 0.7894 | 0.8036 | 0.7587 | 0.7787 | 0.7599 | 0.8000 | 0.8181 | 0.8102 | 0.8148 | 0.7870 | 0.7482 |
| 252 | cg08212685 | 0.1356 | 0.1771 | 0.1055 | 0.0938 | 0.1088 | 0.1558 | 0.3751 | 0.0931 | 0.1204 | 0.1091 | 0.1164 | 0.1479 | 0.1627 | 0.1068 |
| 253 | cg08284151 | 0.5894 | 0.5327 | 0.5361 | 0.5515 | 0.5481 | 0.5237 | 0.5395 | 0.5144 | 0.6403 | 0.5396 | 0.6121 | 0.5901 | 0.5964 | 0.5155 |
| 254 | cg08375941 | 0.7344 | 0.7530 | 0.7794 | 0.7356 | 0.7595 | 0.7746 | 0.7639 | 0.7458 | 0.7598 | 0.7615 | 0.7627 | 0.7393 | 0.7665 | 0.7279 |
| 255 | cg08403419 | 0.7604 | 0.7142 | 0.7355 | 0.7916 | 0.8037 | 0.7487 | 0.7590 | 0.7855 | 0.7477 | 0.7117 | 0.7530 | 0.8030 | 0.7418 | 0.7799 |
| 256 | cg08404225 | 0.7433 | 0.7653 | 0.7163 | 0.7621 | 0.7650 | 0.7138 | 0.7808 | 0.7879 | 0.7780 | 0.6631 | 0.7813 | 0.7815 | 0.7641 | 0.7409 |
| 257 | cg08409225 | 0.4268 | 0.3783 | 0.3306 | 0.3805 | 0.4262 | 0.3766 | 0.5480 | 0.2992 | 0.3882 | 0.4417 | 0.3802 | 0.4526 | 0.5242 | 0.3930 |
| 258 | cg08465774 | 0.7098 | 0.7690 | 0.7925 | 0.7396 | 0.7701 | 0.7678 | 0.7730 | 0.7344 | 0.7680 | 0.7516 | 0.7901 | 0.7878 | 0.7738 | 0.7291 |
| 259 | cg08471713 | 0.5861 | 0.5155 | 0.4809 | 0.4982 | 0.5958 | 0.6017 | 0.5312 | 0.4266 | 0.5210 | 0.5391 | 0.5906 | 0.8130 | 0.4941 | 0.5138 |
| 260 | cg08489623 | 0.6760 | 0.7458 | 0.7551 | 0.7212 | 0.7475 | 0.7187 | 0.7513 | 0.6715 | 0.6940 | 0.6798 | 0.7891 | 0.7832 | 0.7002 | 0.6916 |
| 261 | cg08507270 | 0.8201 | 0.8437 | 0.8289 | 0.8269 | 0.8283 | 0.7900 | 0.8239 | 0.8346 | 0.8349 | 0.8130 | 0.8101 | 0.8497 | 0.8303 | 0.8067 |
| 262 | cg08550724 | 0.8541 | 0.8726 | 0.8710 | 0.8654 | 0.8640 | 0.8669 | 0.8751 | 0.8849 | 0.8724 | 0.8707 | 0.8812 | 0.8623 | 0.8436 | 0.8250 |
| 263 | cg08578023 | 0.1879 | 0.1640 | 0.1096 | 0.1472 | 0.1167 | 0.1369 | 0.1279 | 0.1573 | 0.1453 | 0.1135 | 0.1476 | 0.1732 | 0.1604 | 0.1811 |
| 264 | cg08585897 | 0.5455 | 0.4378 | 0.5894 | 0.5061 | 0.5749 | 0.5523 | 0.6189 | 0.5187 | 0.4880 | 0.4717 | 0.4377 | 0.4295 | 0.5070 | 0.4338 |
| 265 | cg08624068 | 0.8788 | 0.8716 | 0.8725 | 0.8847 | 0.8708 | 0.8725 | 0.8660 | 0.8871 | 0.8670 | 0.8728 | 0.8757 | 0.8607 | 0.8795 | 0.8571 |
| 266 | cg08631437 | 0.2543 | 0.3198 | 0.3278 | 0.2625 | 0.2756 | 0.3016 | 0.2899 | 0.3036 | 0.3097 | 0.3053 | 0.3104 | 0.2949 | 0.3230 | 0.2495 |
| 267 | cg08632701 | 0.7669 | 0.7524 | 0.8369 | 0.8920 | 0.7669 | 0.7893 | 0.8654 | 0.6649 | 0.7343 | 0.7498 | 0.7372 | 0.7673 | 0.8965 | 0.8147 |
| 268 | cg08634464 | 0.3239 | 0.0804 | 0.2997 | 0.2951 | 0.3158 | 0.3527 | 0.3069 | 0.3151 | 0.2778 | 0.2402 | 0.3192 | 0.2717 | 0.3025 | 0.3019 |
| 269 | cg08654334 | 0.6386 | 0.6457 | 0.6677 | 0.6521 | 0.6414 | 0.6054 | 0.6591 | 0.5868 | 0.6464 | 0.6516 | 0.6641 | 0.6159 | 0.6370 | 0.6081 |
| 270 | cg08697242 | 0.8239 | 0.8617 | 0.8702 | 0.8565 | 0.8602 | 0.8710 | 0.8747 | 0.8638 | 0.8564 | 0.8672 | 0.8582 | 0.8525 | 0.8509 | 0.7985 |
| 271 | cg08728865 | 0.9157 | 0.9078 | 0.9225 | 0.9157 | 0.9219 | 0.9109 | 0.9180 | 0.9188 | 0.9108 | 0.9063 | 0.9153 | 0.9256 | 0.9065 | 0.9154 |
| 272 | cg08752459 | 0.2039 | 0.1956 | 0.1601 | 0.2200 | 0.1862 | 0.1923 | 0.1845 | 0.1892 | 0.2167 | 0.2153 | 0.1997 | 0.2105 | 0.2085 | 0.2197 |
| 273 | cg08822227 | 0.5202 | 0.0891 | 0.0959 | 0.4510 | 0.3417 | 0.0873 | 0.1626 | 0.0927 | 0.1608 | 0.1819 | 0.3140 | 0.2341 | 0.1354 | 0.4920 |
| 274 | cg08832227 | 0.2008 | 0.2337 | 0.1165 | 0.2344 | 0.1823 | 0.2646 | 0.2596 | 0.0928 | 0.2626 | 0.2445 | 0.3523 | 0.3733 | 0.1932 | 0.2040 |
| 275 | cg08923109 | 0.8780 | 0.8966 | 0.9008 | 0.8833 | 0.8971 | 0.8847 | 0.8833 | 0.8949 | 0.8850 | 0.8918 | 0.8742 | 0.8888 | 0.8786 | 0.8725 |
| 276 | cg08983760 | 0.8020 | 0.7372 | 0.8177 | 0.8421 | 0.7567 | 0.7040 | 0.8028 | 0.8222 | 0.7511 | 0.6991 | 0.7297 | 0.7687 | 0.7808 | 0.7454 |
| 277 | cg09034896 | 0.7778 | 0.7087 | 0.7259 | 0.7916 | 0.7812 | 0.7306 | 0.7719 | 0.0296 | 0.4448 | 0.7500 | 0.7560 | 0.7814 | 0.7442 | 0.7636 |
| 278 | cg09058542 | 0.8417 | 0.8660 | 0.8752 | 0.8587 | 0.8583 | 0.8540 | 0.8662 | 0.8304 | 0.8458 | 0.8698 | 0.8447 | 0.8449 | 0.8664 | 0.8031 |
| 279 | cg09060914 | 0.8400 | 0.8413 | 0.8573 | 0.8256 | 0.8401 | 0.8381 | 0.8679 | 0.8282 | 0.8442 | 0.8432 | 0.8446 | 0.8199 | 0.8564 | 0.8166 |
| 280 | cg09087901 | 0.6733 | 0.7346 | 0.7316 | 0.7384 | 0.6777 | 0.7032 | 0.6872 | 0.6841 | 0.7263 | 0.7786 | 0.7347 | 0.6721 | 0.7042 | 0.7146 |
| 281 | cg09088193 | 0.8737 | 0.8819 | 0.9040 | 0.8709 | 0.8948 | 0.8866 | 0.8724 | 0.8933 | 0.8545 | 0.8840 | 0.8806 | 0.8680 | 0.8835 | 0.8655 |
| 282 | cg09096031 | 0.5494 | 0.6051 | 0.5275 | 0.5463 | 0.6884 | 0.6425 | 0.6733 | 0.6029 | 0.6343 | 0.6640 | 0.6835 | 0.6862 | 0.6380 | 0.6346 |
| 283 | cg09096383 | 0.7245 | 0.7928 | 0.8118 | 0.7513 | 0.7633 | 0.7208 | 0.7513 | 0.7468 | 0.7583 | 0.7567 | 0.7740 | 0.7770 | 0.7902 | 0.7296 |
| 284 | cg09111484 | 0.7925 | 0.8092 | 0.7849 | 0.8056 | 0.8228 | 0.7961 | 0.8017 | 0.7463 | 0.7933 | 0.8010 | 0.8089 | 0.8167 | 0.8027 | 0.7836 |
| 285 | cg09238677 | 0.2103 | 0.1791 | 0.1176 | 0.1504 | 0.1610 | 0.1465 | 0.1158 | 0.1301 | 0.1540 | 0.1406 | 0.1825 | 0.1790 | 0.1626 | 0.1968 |
| 286 | cg09262269 | 0.1050 | 0.1391 | 0.1632 | 0.0608 | 0.1234 | 0.1116 | 0.0843 | 0.0636 | 0.0871 | 0.1275 | 0.1695 | 0.2042 | 0.2127 | 0.0966 |
| 287 | cg09272256 | 0.8019 | 0.8662 | 0.8602 | 0.8352 | 0.8395 | 0.8394 | 0.8430 | 0.8265 | 0.8328 | 0.8474 | 0.8561 | 0.8301 | 0.8347 | 0.7959 |
| 288 | cg09277575 | 0.7264 | 0.7732 | 0.7487 | 0.7603 | 0.7646 | 0.7403 | 0.7401 | 0.6942 | 0.7638 | 0.7652 | 0.7597 | 0.7431 | 0.7840 | 0.6887 |
| 289 | cg09321965 | 0.8000 | 0.8062 | 0.8552 | 0.7988 | 0.8565 | 0.8112 | 0.8472 | 0.8148 | 0.8266 | 0.8163 | 0.8137 | 0.7931 | 0.7908 | 0.7799 |
| 290 | cg09360083 | 0.6965 | 0.7162 | 0.7417 | 0.7323 | 0.7465 | 0.7242 | 0.7293 | 0.7319 | 0.7305 | 0.7001 | 0.7457 | 0.7109 | 0.7230 | 0.6482 |
| 291 | cg09375488 | 0.7101 | 0.7629 | 0.7833 | 0.7431 | 0.7650 | 0.7688 | 0.7730 | 0.7365 | 0.7531 | 0.7678 | 0.7317 | 0.7265 | 0.7458 | 0.7158 |
| 292 | cg09377486 | 0.8280 | 0.8511 | 0.8454 | 0.8651 | 0.8730 | 0.8545 | 0.8584 | 0.8520 | 0.8367 | 0.8711 | 0.8611 | 0.8570 | 0.7347 | 0.8158 |
| 293 | cg09440243 | 0.8280 | 0.8207 | 0.8447 | 0.8298 | 0.8259 | 0.8222 | 0.8355 | 0.8195 | 0.8294 | 0.7771 | 0.8435 | 0.8430 | 0.8288 | 0.7916 |
| 294 | cg09448875 | 0.8483 | 0.8767 | 0.8742 | 0.8626 | 0.8719 | 0.8761 | 0.8853 | 0.8674 | 0.8835 | 0.8765 | 0.8783 | 0.8770 | 0.8693 | 0.8278 |
| 295 | cg09478478 | 0.7809 | 0.8153 | 0.8133 | 0.7489 | 0.8109 | 0.8130 | 0.8041 | 0.7777 | 0.8098 | 0.8121 | 0.7736 | 0.8012 | 0.8036 | 0.7628 |
| 296 | cg09494546 | 0.8400 | 0.8563 | 0.8353 | 0.8495 | 0.8512 | 0.8483 | 0.8569 | 0.8439 | 0.8646 | 0.8642 | 0.8720 | 0.8502 | 0.8535 | 0.7647 |
| 297 | cg09526693 | 0.7959 | 0.8137 | 0.8264 | 0.8223 | 0.8171 | 0.8202 | 0.8202 | 0.8517 | 0.8135 | 0.8068 | 0.8051 | 0.7851 | 0.8127 | 0.7915 |
| 298 | cg09532664 | 0.7621 | 0.8659 | 0.8601 | 0.7773 | 0.8654 | 0.8424 | 0.8090 | 0.4134 | 0.4849 | 0.7737 | 0.7814 | 0.7846 | 0.7983 | 0.8385 |
| 299 | cg09559551 | 0.7651 | 0.8211 | 0.8196 | 0.8314 | 0.8151 | 0.8188 | 0.7970 | 0.8048 | 0.8102 | 0.7977 | 0.8209 | 0.8027 | 0.8041 | 0.7567 |
| 300 | cg09656934 | 0.4057 | 0.3958 | 0.3189 | 0.3542 | 0.4894 | 0.3331 | 0.4431 | 0.2909 | 0.4216 | 0.3052 | 0.3778 | 0.4308 | 0.4375 | 0.4594 |
| 301 | cg09745307 | 0.6890 | 0.7020 | 0.7066 | 0.6841 | 0.6937 | 0.6535 | 0.7136 | 0.6994 | 0.7370 | 0.7081 | 0.6885 | 0.7189 | 0.7243 | 0.6606 |



|     |            |        |        |        |        |        |        |        |        |        |        |        |        |        |        |
|-----|------------|--------|--------|--------|--------|--------|--------|--------|--------|--------|--------|--------|--------|--------|--------|
| 302 | cg09748960 | 0.7906 | 0.7556 | 0.8365 | 0.7909 | 0.7910 | 0.8154 | 0.7423 | 0.8236 | 0.8188 | 0.8139 | 0.8289 | 0.8190 | 0.8245 | 0.7343 |
| 303 | cg09784259 | 0.8038 | 0.8062 | 0.8419 | 0.8063 | 0.8136 | 0.8254 | 0.8162 | 0.8255 | 0.8181 | 0.8146 | 0.8198 | 0.8082 | 0.8008 | 0.7413 |
| 304 | cg09816180 | 0.8337 | 0.8410 | 0.8504 | 0.8444 | 0.8395 | 0.8161 | 0.8485 | 0.8433 | 0.8301 | 0.8159 | 0.8092 | 0.8561 | 0.8143 | 0.8274 |
| 305 | cg09830278 | 0.7851 | 0.8291 | 0.8311 | 0.8137 | 0.8253 | 0.8384 | 0.8122 | 0.8285 | 0.8128 | 0.8137 | 0.8357 | 0.7990 | 0.8175 | 0.7422 |
| 306 | cg09845785 | 0.0705 | 0.0816 | 0.0670 | 0.0846 | 0.0869 | 0.0700 | 0.0735 | 0.0923 | 0.0891 | 0.0773 | 0.1059 | 0.0947 | 0.0880 | 0.0826 |
| 307 | cg09873510 | 0.7942 | 0.7846 | 0.8214 | 0.7805 | 0.7716 | 0.8088 | 0.8092 | 0.7835 | 0.7726 | 0.8061 | 0.8009 | 0.7685 | 0.7916 | 0.7155 |
| 308 | cg09898548 | 0.8020 | 0.8158 | 0.8383 | 0.7878 | 0.8370 | 0.8129 | 0.8238 | 0.7840 | 0.8242 | 0.8156 | 0.8038 | 0.8093 | 0.8363 | 0.7331 |
| 309 | cg09944526 | 0.8504 | 0.8800 | 0.8960 | 0.8577 | 0.8699 | 0.8757 | 0.8770 | 0.8788 | 0.8832 | 0.8841 | 0.8795 | 0.8595 | 0.8675 | 0.8304 |
| 310 | cg09958090 | 0.0426 | 0.0464 | 0.0364 | 0.0335 | 0.0358 | 0.0384 | 0.0395 | 0.0377 | 0.0464 | 0.0436 | 0.0409 | 0.0504 | 0.0408 | 0.0364 |
| 311 | cg10087081 | 0.7340 | 0.7423 | 0.7550 | 0.7338 | 0.7552 | 0.7232 | 0.7620 | 0.7658 | 0.7735 | 0.7384 | 0.7543 | 0.7706 | 0.7776 | 0.7188 |
| 312 | cg10094277 | 0.7764 | 0.7964 | 0.8112 | 0.7760 | 0.7801 | 0.8134 | 0.7968 | 0.7799 | 0.7978 | 0.7789 | 0.7468 | 0.7760 | 0.7949 | 0.7130 |
| 313 | cg10100220 | 0.8296 | 0.8590 | 0.8706 | 0.8510 | 0.8611 | 0.8588 | 0.8685 | 0.8655 | 0.8647 | 0.8512 | 0.8594 | 0.8640 | 0.8572 | 0.8400 |
| 314 | cg10130071 | 0.8753 | 0.8814 | 0.8853 | 0.8701 | 0.8937 | 0.8901 | 0.8997 | 0.8943 | 0.8709 | 0.8910 | 0.8905 | 0.8801 | 0.8806 | 0.8672 |
| 315 | cg10198837 | 0.9231 | 0.9201 | 0.9344 | 0.9340 | 0.9372 | 0.9367 | 0.9347 | 0.9243 | 0.9267 | 0.9219 | 0.9206 | 0.9234 | 0.9152 | 0.9190 |
| 316 | cg10237469 | 0.1776 | 0.2115 | 0.1685 | 0.2938 | 0.3318 | 0.1790 | 0.1867 | 0.1531 | 0.2051 | 0.3287 | 0.2156 | 0.2177 | 0.2162 | 0.1680 |
| 317 | cg10238171 | 0.7013 | 0.7247 | 0.7290 | 0.7222 | 0.7098 | 0.7455 | 0.7374 | 0.7229 | 0.7024 | 0.7130 | 0.7449 | 0.7498 | 0.7248 | 0.6936 |
| 318 | cg10241097 | 0.8197 | 0.8517 | 0.8508 | 0.8303 | 0.8326 | 0.8568 | 0.8239 | 0.8265 | 0.8533 | 0.8301 | 0.8368 | 0.8568 | 0.8251 | 0.8288 |
| 319 | cg10281770 | 0.5964 | 0.7456 | 0.4451 | 0.6309 | 0.6566 | 0.6088 | 0.7616 | 0.7800 | 0.7119 | 0.7080 | 0.7799 | 0.6971 | 0.6118 | 0.6324 |
| 320 | cg10296238 | 0.2503 | 0.6599 | 0.3882 | 0.2535 | 0.8140 | 0.5136 | 0.4833 | 0.2735 | 0.1715 | 0.5920 | 0.7439 | 0.4306 | 0.3970 | 0.2850 |
| 321 | cg10362475 | 0.2356 | 0.3548 | 0.2516 | 0.5762 | 0.3134 | 0.2709 | 0.2807 | 0.4863 | 0.3464 | 0.3290 | 0.2977 | 0.3385 | 0.2968 | 0.2599 |
| 322 | cg10371914 | 0.7332 | 0.6984 | 0.6982 | 0.6966 | 0.6927 | 0.7000 | 0.7474 | 0.6794 | 0.7399 | 0.6834 | 0.6930 | 0.7188 | 0.6981 | 0.6438 |
| 323 | cg10401088 | 0.5476 | 0.6266 | 0.5394 | 0.5339 | 0.6112 | 0.5714 | 0.5594 | 0.5224 | 0.5779 | 0.6074 | 0.5913 | 0.6250 | 0.5836 | 0.5811 |
| 324 | cg10409680 | 0.0534 | 0.0625 | 0.1303 | 0.1479 | 0.0694 | 0.0375 | 0.0344 | 0.1776 | 0.1884 | 0.0718 | 0.0504 | 0.0588 | 0.0985 | 0.0474 |
| 325 | cg10431340 | 0.6624 | 0.7583 | 0.7337 | 0.7419 | 0.7403 | 0.7113 | 0.7571 | 0.7532 | 0.7792 | 0.7499 | 0.7091 | 0.7832 | 0.7572 | 0.7076 |
| 326 | cg10501629 | 0.8709 | 0.8563 | 0.8750 | 0.8652 | 0.8892 | 0.8579 | 0.8687 | 0.8876 | 0.8655 | 0.8586 | 0.8425 | 0.8621 | 0.8639 | 0.8450 |
| 327 | cg10569616 | 0.7836 | 0.8130 | 0.8422 | 0.7936 | 0.7939 | 0.8096 | 0.8309 | 0.8117 | 0.7996 | 0.8093 | 0.8217 | 0.7855 | 0.7917 | 0.7789 |
| 328 | cg10576828 | 0.8513 | 0.8351 | 0.8638 | 0.8360 | 0.8368 | 0.8403 | 0.8629 | 0.8750 | 0.8376 | 0.8409 | 0.8273 | 0.8506 | 0.8349 | 0.7999 |
| 329 | cg10585462 | 0.7537 | 0.7683 | 0.8059 | 0.7656 | 0.7892 | 0.7940 | 0.7708 | 0.7611 | 0.7713 | 0.7789 | 0.7755 | 0.7768 | 0.7577 | 0.7311 |
| 330 | cg10620457 | 0.8110 | 0.8085 | 0.8281 | 0.8134 | 0.8291 | 0.8041 | 0.8325 | 0.8142 | 0.7921 | 0.7897 | 0.7958 | 0.8296 | 0.8203 | 0.8024 |
| 331 | cg10648908 | 0.0534 | 0.0772 | 0.0625 | 0.0586 | 0.0837 | 0.0682 | 0.0533 | 0.0705 | 0.0898 | 0.0611 | 0.0826 | 0.0660 | 0.0691 | 0.0386 |
| 332 | cg10671066 | 0.1518 | 0.1188 | 0.1074 | 0.1018 | 0.1053 | 0.1179 | 0.1044 | 0.1277 | 0.1168 | 0.1111 | 0.1290 | 0.1176 | 0.1283 | 0.1427 |
| 333 | cg10707565 | 0.8077 | 0.8293 | 0.8430 | 0.8240 | 0.8350 | 0.8320 | 0.8268 | 0.8401 | 0.8177 | 0.8358 | 0.8421 | 0.8326 | 0.8234 | 0.7643 |
| 334 | cg10715231 | 0.9176 | 0.9075 | 0.9353 | 0.9250 | 0.9286 | 0.9228 | 0.9285 | 0.9229 | 0.9158 | 0.9171 | 0.9192 | 0.9251 | 0.9104 | 0.9283 |
| 335 | cg10732834 | 0.8057 | 0.8293 | 0.8222 | 0.8112 | 0.8164 | 0.8235 | 0.8124 | 0.8087 | 0.8129 | 0.8298 | 0.8465 | 0.8017 | 0.8121 | 0.7748 |
| 336 | cg10746737 | 0.8159 | 0.8741 | 0.8725 | 0.8973 | 0.8865 | 0.8302 | 0.8184 | 0.8670 | 0.6947 | 0.7433 | 0.8512 | 0.8624 | 0.8095 | 0.8656 |
| 337 | cg10753073 | 0.8841 | 0.8879 | 0.8996 | 0.8792 | 0.8952 | 0.8837 | 0.8957 | 0.8691 | 0.8784 | 0.8969 | 0.8863 | 0.8782 | 0.8907 | 0.8443 |
| 338 | cg10756887 | 0.0880 | 0.0756 | 0.0713 | 0.0710 | 0.1045 | 0.0801 | 0.3280 | 0.1945 | 0.2824 | 0.1504 | 0.0888 | 0.0804 | 0.0839 | 0.0497 |
| 339 | cg10771262 | 0.3253 | 0.2671 | 0.3182 | 0.3232 | 0.3203 | 0.2770 | 0.3450 | 0.2796 | 0.2974 | 0.2979 | 0.3227 | 0.3238 | 0.3565 | 0.3116 |
| 340 | cg10835876 | 0.8100 | 0.8304 | 0.8366 | 0.8265 | 0.8139 | 0.8441 | 0.8406 | 0.8092 | 0.8193 | 0.8348 | 0.8098 | 0.8052 | 0.8151 | 0.8058 |
| 341 | cg10846410 | 0.7337 | 0.7648 | 0.7880 | 0.7605 | 0.7761 | 0.7593 | 0.7918 | 0.7715 | 0.8006 | 0.7663 | 0.7696 | 0.7435 | 0.7612 | 0.7029 |
| 342 | cg10851775 | 0.7665 | 0.7613 | 0.8026 | 0.7897 | 0.7890 | 0.8128 | 0.7923 | 0.7721 | 0.7790 | 0.7699 | 0.7537 | 0.7850 | 0.7757 | 0.7260 |
| 343 | cg10874403 | 0.7435 | 0.7777 | 0.7942 | 0.7503 | 0.7527 | 0.7311 | 0.7432 | 0.7552 | 0.7695 | 0.7617 | 0.7788 | 0.7414 | 0.7488 | 0.7210 |
| 344 | cg10878998 | 0.1970 | 0.2567 | 0.2563 | 0.2294 | 0.2346 | 0.2208 | 0.2405 | 0.1978 | 0.3093 | 0.2975 | 0.2816 | 0.2592 | 0.2884 | 0.2059 |
| 345 | cg10920765 | 0.7021 | 0.7525 | 0.7662 | 0.7415 | 0.7334 | 0.7475 | 0.7774 | 0.7896 | 0.7484 | 0.7508 | 0.7482 | 0.7293 | 0.7284 | 0.6848 |
| 346 | cg10978346 | 0.6519 | 0.7051 | 0.7332 | 0.6854 | 0.6639 | 0.6983 | 0.7062 | 0.6333 | 0.7070 | 0.7284 | 0.6996 | 0.7009 | 0.6934 | 0.6737 |
| 347 | cg10985320 | 0.8871 | 0.8668 | 0.9027 | 0.8811 | 0.8847 | 0.8927 | 0.9017 | 0.9037 | 0.8908 | 0.8875 | 0.8846 | 0.8530 | 0.8920 | 0.8648 |
| 348 | cg10997248 | 0.6009 | 0.6735 | 0.6432 | 0.6218 | 0.7205 | 0.6691 | 0.6442 | 0.6388 | 0.6105 | 0.6608 | 0.6122 | 0.5276 | 0.7087 | 0.6836 |
| 349 | cg11059341 | 0.8082 | 0.8179 | 0.8386 | 0.8081 | 0.8377 | 0.8006 | 0.8147 | 0.8029 | 0.8164 | 0.8212 | 0.7926 | 0.8209 | 0.7905 | 0.7710 |
| 350 | cg11074362 | 0.7207 | 0.7736 | 0.7378 | 0.7326 | 0.7505 | 0.7567 | 0.7655 | 0.7364 | 0.7579 | 0.7656 | 0.7582 | 0.6883 | 0.7381 | 0.7419 |
| 351 | cg11077161 | 0.7337 | 0.7702 | 0.8195 | 0.7671 | 0.7964 | 0.7944 | 0.8211 | 0.7548 | 0.8024 | 0.7892 | 0.8021 | 0.7653 | 0.7793 | 0.6778 |
| 352 | cg11108890 | 0.1571 | 0.1903 | 0.3674 | 0.1450 | 0.4908 | 0.2494 | 0.2904 | 0.1033 | 0.1199 | 0.3025 | 0.2787 | 0.3507 | 0.2545 | 0.3345 |
| 353 | cg11119884 | 0.7021 | 0.7170 | 0.7383 | 0.6931 | 0.7241 | 0.6811 | 0.7269 | 0.6809 | 0.7473 | 0.7412 | 0.7096 | 0.6859 | 0.7549 | 0.6884 |

|     |            |        |        |        |        |        |        |        |        |        |        |        |        |        |        |
|-----|------------|--------|--------|--------|--------|--------|--------|--------|--------|--------|--------|--------|--------|--------|--------|
| 354 | cg11126313 | 0.8235 | 0.8551 | 0.8502 | 0.8187 | 0.8212 | 0.8501 | 0.8301 | 0.8162 | 0.8572 | 0.8284 | 0.8553 | 0.8341 | 0.8429 | 0.7468 |
| 355 | cg11152574 | 0.8140 | 0.8625 | 0.8583 | 0.8286 | 0.8189 | 0.8391 | 0.8376 | 0.8148 | 0.8437 | 0.8669 | 0.8333 | 0.8417 | 0.8410 | 0.7781 |
| 356 | cg11166999 | 0.7904 | 0.8226 | 0.8413 | 0.8216 | 0.8240 | 0.8310 | 0.8293 | 0.8290 | 0.8206 | 0.8403 | 0.8372 | 0.8231 | 0.8147 | 0.7769 |
| 357 | cg11178136 | 0.8400 | 0.8674 | 0.8904 | 0.8838 | 0.8708 | 0.8736 | 0.8722 | 0.8554 | 0.8834 | 0.8777 | 0.8776 | 0.8331 | 0.8638 | 0.7981 |
| 358 | cg11207564 | 0.4489 | 0.2446 | 0.2562 | 0.1686 | 0.3147 | 0.2842 | 0.2194 | 0.2571 | 0.3081 | 0.2350 | 0.2351 | 0.2383 | 0.2654 | 0.2065 |
| 359 | cg11231018 | 0.8333 | 0.8653 | 0.8775 | 0.8374 | 0.8551 | 0.8691 | 0.8632 | 0.8534 | 0.8804 | 0.8712 | 0.8561 | 0.8402 | 0.8601 | 0.7848 |
| 360 | cg11235426 | 0.5988 | 0.4675 | 0.5080 | 0.4907 | 0.0718 | 0.5406 | 0.4245 | 0.5802 | 0.4973 | 0.4756 | 0.3593 | 0.5916 | 0.4917 | 0.5336 |
| 361 | cg11237738 | 0.8195 | 0.7750 | 0.8286 | 0.7802 | 0.8263 | 0.8062 | 0.8522 | 0.8242 | 0.8130 | 0.8078 | 0.7912 | 0.7908 | 0.7991 | 0.7869 |
| 362 | cg11251498 | 0.4584 | 0.5165 | 0.4819 | 0.4577 | 0.5782 | 0.4917 | 0.6230 | 0.5388 | 0.5390 | 0.5177 | 0.5344 | 0.5495 | 0.5430 | 0.4903 |
| 363 | cg11295113 | 0.7836 | 0.8035 | 0.8157 | 0.8064 | 0.8029 | 0.8190 | 0.8392 | 0.8235 | 0.7855 | 0.8137 | 0.8243 | 0.8239 | 0.8003 | 0.7367 |
| 364 | cg11308639 | 0.7820 | 0.7911 | 0.8094 | 0.7576 | 0.7978 | 0.8031 | 0.8274 | 0.7792 | 0.7789 | 0.8028 | 0.7884 | 0.7914 | 0.8134 | 0.7591 |
| 365 | cg11376198 | 0.1176 | 0.2551 | 0.0879 | 0.2253 | 0.4886 | 0.1083 | 0.2359 | 0.0808 | 0.0779 | 0.2060 | 0.3508 | 0.0817 | 0.0689 | 0.2613 |
| 366 | cg11378052 | 0.7686 | 0.7712 | 0.7517 | 0.7667 | 0.7956 | 0.7835 | 0.8185 | 0.7919 | 0.7711 | 0.7702 | 0.8141 | 0.7725 | 0.7878 | 0.7738 |
| 367 | cg11386709 | 0.8421 | 0.8538 | 0.8815 | 0.8498 | 0.8655 | 0.8551 | 0.8568 | 0.8578 | 0.8601 | 0.8559 | 0.8484 | 0.8430 | 0.8655 | 0.8064 |
| 368 | cg11391732 | 0.8810 | 0.9109 | 0.9062 | 0.8986 | 0.9008 | 0.8997 | 0.8868 | 0.8995 | 0.8996 | 0.9021 | 0.8938 | 0.8911 | 0.8993 | 0.8764 |
| 369 | cg11479877 | 0.8151 | 0.7999 | 0.8289 | 0.8339 | 0.8242 | 0.8275 | 0.8359 | 0.8218 | 0.8316 | 0.7986 | 0.8363 | 0.8306 | 0.7989 | 0.7698 |
| 370 | cg11504646 | 0.8522 | 0.8418 | 0.8605 | 0.8529 | 0.8542 | 0.8330 | 0.8387 | 0.8421 | 0.8394 | 0.8293 | 0.8570 | 0.8519 | 0.8207 | 0.7856 |
| 371 | cg11554605 | 0.8804 | 0.8900 | 0.9083 | 0.8804 | 0.8893 | 0.8912 | 0.8838 | 0.8832 | 0.8951 | 0.8792 | 0.8984 | 0.8840 | 0.8807 | 0.8718 |
| 372 | cg11649846 | 0.8286 | 0.8606 | 0.8603 | 0.8442 | 0.8321 | 0.8511 | 0.8277 | 0.8313 | 0.8686 | 0.8489 | 0.8440 | 0.8201 | 0.8455 | 0.7909 |
| 373 | cg11680741 | 0.6550 | 0.7128 | 0.6871 | 0.6356 | 0.6563 | 0.6750 | 0.6528 | 0.6439 | 0.6832 | 0.6743 | 0.6241 | 0.6559 | 0.6936 | 0.6193 |
| 374 | cg11698653 | 0.6695 | 0.7003 | 0.7556 | 0.6990 | 0.7120 | 0.7156 | 0.7239 | 0.7095 | 0.7122 | 0.7086 | 0.7323 | 0.7223 | 0.7442 | 0.6950 |
| 375 | cg11726593 | 0.4133 | 0.3417 | 0.3231 | 0.2916 | 0.3197 | 0.3546 | 0.3842 | 0.3196 | 0.3376 | 0.3546 | 0.3117 | 0.3177 | 0.3589 | 0.3221 |
| 376 | cg11793332 | 0.1310 | 0.1007 | 0.0848 | 0.1183 | 0.1150 | 0.1108 | 0.1089 | 0.1290 | 0.1019 | 0.1071 | 0.0946 | 0.1315 | 0.1105 | 0.1318 |
| 377 | cg11799561 | 0.7385 | 0.7627 | 0.8073 | 0.7297 | 0.7605 | 0.7531 | 0.7744 | 0.7230 | 0.7690 | 0.7385 | 0.7377 | 0.7353 | 0.7806 | 0.7278 |
| 378 | cg11879188 | 0.9113 | 0.8121 | 0.9290 | 0.8824 | 0.9314 | 0.8259 | 0.9211 | 0.8398 | 0.8069 | 0.8110 | 0.8909 | 0.9373 | 0.8895 | 0.9297 |
| 379 | cg11884699 | 0.7934 | 0.8014 | 0.8198 | 0.8170 | 0.8479 | 0.8087 | 0.8236 | 0.8028 | 0.8489 | 0.8425 | 0.7859 | 0.7862 | 0.8121 | 0.7588 |
| 380 | cg12010995 | 0.6983 | 0.7167 | 0.7396 | 0.6940 | 0.6988 | 0.7453 | 0.7113 | 0.7422 | 0.7317 | 0.7214 | 0.7571 | 0.6984 | 0.7218 | 0.6449 |
| 381 | cg12014368 | 0.6802 | 0.7337 | 0.7354 | 0.6851 | 0.7181 | 0.7377 | 0.7313 | 0.7209 | 0.7336 | 0.7269 | 0.7161 | 0.6832 | 0.7191 | 0.6632 |
| 382 | cg12024906 | 0.1321 | 0.2488 | 0.2101 | 0.4254 | 0.2617 | 0.1589 | 0.1924 | 0.0776 | 0.1922 | 0.1878 | 0.1770 | 0.1531 | 0.1109 | 0.3039 |
| 383 | cg12032049 | 0.8172 | 0.8155 | 0.8394 | 0.8236 | 0.8487 | 0.8408 | 0.8217 | 0.8248 | 0.8384 | 0.8131 | 0.8255 | 0.8418 | 0.8365 | 0.7995 |
| 384 | cg12044689 | 0.9065 | 0.9251 | 0.9361 | 0.9340 | 0.9279 | 0.9290 | 0.9375 | 0.9296 | 0.9165 | 0.9353 | 0.9264 | 0.9209 | 0.9193 | 0.9031 |
| 385 | cg12058490 | 0.8182 | 0.8354 | 0.8400 | 0.8134 | 0.8153 | 0.8344 | 0.8101 | 0.8245 | 0.8251 | 0.8499 | 0.8187 | 0.8103 | 0.8396 | 0.7478 |
| 386 | cg12064929 | 0.7359 | 0.7777 | 0.7914 | 0.7715 | 0.8104 | 0.7459 | 0.7647 | 0.7877 | 0.7917 | 0.7785 | 0.7779 | 0.7905 | 0.7776 | 0.7128 |
| 387 | cg12067287 | 0.8910 | 0.8868 | 0.8998 | 0.8956 | 0.8801 | 0.8928 | 0.8967 | 0.8720 | 0.8873 | 0.8987 | 0.8917 | 0.8974 | 0.9006 | 0.8820 |
| 388 | cg12095491 | 0.8315 | 0.8646 | 0.8641 | 0.8421 | 0.8691 | 0.8698 | 0.8704 | 0.8548 | 0.8357 | 0.8443 | 0.8432 | 0.8571 | 0.8395 | 0.8279 |
| 389 | cg12108912 | 0.7920 | 0.8359 | 0.7771 | 0.7793 | 0.7356 | 0.8001 | 0.8125 | 0.8085 | 0.7855 | 0.8236 | 0.7809 | 0.6980 | 0.8307 | 0.8209 |
| 390 | cg12128839 | 0.6865 | 0.6344 | 0.6267 | 0.6651 | 0.8525 | 0.6673 | 0.7121 | 0.7653 | 0.6846 | 0.7070 | 0.6135 | 0.7159 | 0.6609 | 0.5976 |
| 391 | cg12182525 | 0.8699 | 0.8807 | 0.8920 | 0.8690 | 0.8993 | 0.8754 | 0.8766 | 0.8916 | 0.8736 | 0.8781 | 0.8724 | 0.8885 | 0.8804 | 0.8554 |
| 392 | cg12218747 | 0.6870 | 0.6263 | 0.7394 | 0.8266 | 0.6718 | 0.6885 | 0.7747 | 0.5840 | 0.6161 | 0.6607 | 0.6246 | 0.6606 | 0.8027 | 0.7131 |
| 393 | cg12255284 | 0.6946 | 0.7062 | 0.7333 | 0.7051 | 0.7307 | 0.7078 | 0.7430 | 0.7322 | 0.7306 | 0.7692 | 0.7704 | 0.7562 | 0.6987 | 0.6660 |
| 394 | cg12274567 | 0.8696 | 0.8713 | 0.8735 | 0.8522 | 0.9041 | 0.8746 | 0.8802 | 0.8784 | 0.8697 | 0.8585 | 0.8665 | 0.8591 | 0.8574 | 0.8610 |
| 395 | cg12286890 | 0.8257 | 0.8636 | 0.8546 | 0.8359 | 0.8379 | 0.8490 | 0.8537 | 0.7679 | 0.8160 | 0.8395 | 0.8468 | 0.8471 | 0.7741 | 0.8518 |
| 396 | cg12331980 | 0.7875 | 0.7988 | 0.8526 | 0.8015 | 0.8218 | 0.8241 | 0.8050 | 0.7980 | 0.8058 | 0.8394 | 0.8181 | 0.8161 | 0.8186 | 0.7415 |
| 397 | cg12348970 | 0.8816 | 0.8940 | 0.8999 | 0.8735 | 0.8982 | 0.8925 | 0.8999 | 0.9018 | 0.8870 | 0.8614 | 0.8909 | 0.8902 | 0.8799 | 0.8598 |
| 398 | cg12368241 | 0.8397 | 0.8378 | 0.8448 | 0.8401 | 0.8334 | 0.8397 | 0.8478 | 0.8383 | 0.8307 | 0.8372 | 0.8462 | 0.8364 | 0.8318 | 0.8384 |
| 399 | cg12380854 | 0.7449 | 0.7539 | 0.7262 | 0.7208 | 0.7616 | 0.7653 | 0.7564 | 0.6908 | 0.7926 | 0.7546 | 0.7775 | 0.7787 | 0.7803 | 0.7762 |
| 400 | cg12387247 | 0.6313 | 0.6269 | 0.6506 | 0.6307 | 0.6757 | 0.6409 | 0.7265 | 0.6727 | 0.5990 | 0.6496 | 0.6538 | 0.6830 | 0.6763 | 0.6604 |
| 401 | cg12397274 | 0.7271 | 0.7766 | 0.7965 | 0.7798 | 0.7940 | 0.7278 | 0.7842 | 0.7375 | 0.8010 | 0.7818 | 0.7775 | 0.8010 | 0.7640 | 0.7377 |
| 402 | cg12428447 | 0.8025 | 0.8075 | 0.8041 | 0.7658 | 0.8197 | 0.8200 | 0.7973 | 0.8234 | 0.8291 | 0.8366 | 0.8144 | 0.7900 | 0.8103 | 0.7280 |
| 403 | cg12437481 | 0.7974 | 0.7036 | 0.2538 | 0.5771 | 0.8900 | 0.3606 | 0.8699 | 0.6912 | 0.7391 | 0.8560 | 0.7349 | 0.8619 | 0.6307 | 0.6778 |
| 404 | cg12491710 | 0.9066 | 0.9269 | 0.9367 | 0.9075 | 0.9436 | 0.9290 | 0.9436 | 0.9287 | 0.9210 | 0.9080 | 0.9090 | 0.9179 | 0.9322 | 0.9286 |
| 405 | cg12542281 | 0.0846 | 0.0793 | 0.0725 | 0.0829 | 0.0736 | 0.0684 | 0.0724 | 0.0998 | 0.0968 | 0.0828 | 0.0863 | 0.0703 | 0.0998 | 0.1054 |

|     |            |        |        |        |        |        |        |        |        |        |        |        |        |        |        |
|-----|------------|--------|--------|--------|--------|--------|--------|--------|--------|--------|--------|--------|--------|--------|--------|
| 406 | cg12610070 | 0.1745 | 0.1991 | 0.1537 | 0.1915 | 0.1769 | 0.1897 | 0.2254 | 0.1532 | 0.1949 | 0.2196 | 0.2090 | 0.2272 | 0.2219 | 0.1582 |
| 407 | cg12611860 | 0.7627 | 0.7685 | 0.7789 | 0.7513 | 0.8049 | 0.7851 | 0.7747 | 0.8064 | 0.7899 | 0.7690 | 0.7638 | 0.7696 | 0.7854 | 0.7405 |
| 408 | cg12626411 | 0.6691 | 0.7198 | 0.7347 | 0.7214 | 0.7223 | 0.7103 | 0.7252 | 0.7295 | 0.7305 | 0.6958 | 0.6860 | 0.7136 | 0.7275 | 0.5893 |
| 409 | cg12647320 | 0.8387 | 0.8771 | 0.8891 | 0.8557 | 0.8741 | 0.8776 | 0.8964 | 0.8617 | 0.8912 | 0.8855 | 0.8834 | 0.8585 | 0.8538 | 0.8164 |
| 410 | cg12658552 | 0.8089 | 0.8572 | 0.8696 | 0.8428 | 0.8423 | 0.8399 | 0.8635 | 0.8519 | 0.8598 | 0.8493 | 0.8612 | 0.8557 | 0.8579 | 0.8014 |
| 411 | cg12671744 | 0.5616 | 0.6171 | 0.6047 | 0.6362 | 0.6135 | 0.6890 | 0.6848 | 0.5405 | 0.5994 | 0.6640 | 0.5402 | 0.6257 | 0.5911 | 0.6149 |
| 412 | cg12694555 | 0.8299 | 0.8496 | 0.8622 | 0.8181 | 0.8461 | 0.8515 | 0.8346 | 0.8510 | 0.8626 | 0.8712 | 0.8572 | 0.8523 | 0.8511 | 0.8118 |
| 413 | cg12775613 | 0.8414 | 0.8680 | 0.8422 | 0.8635 | 0.8698 | 0.8709 | 0.8821 | 0.8662 | 0.8502 | 0.8575 | 0.8498 | 0.8691 | 0.8545 | 0.8814 |
| 414 | cg12791554 | 0.8595 | 0.8761 | 0.8936 | 0.8006 | 0.8627 | 0.8230 | 0.8789 | 0.8331 | 0.8530 | 0.8477 | 0.8454 | 0.8512 | 0.8219 | 0.8541 |
| 415 | cg12856392 | 0.5786 | 0.5556 | 0.6752 | 0.6948 | 0.5976 | 0.7351 | 0.6797 | 0.6191 | 0.5356 | 0.5757 | 0.6739 | 0.6437 | 0.6547 | 0.6076 |
| 416 | cg12864235 | 0.7797 | 0.6491 | 0.4652 | 0.7133 | 0.6073 | 0.7787 | 0.7456 | 0.2373 | 0.5612 | 0.6131 | 0.5955 | 0.6121 | 0.6887 | 0.7656 |
| 417 | cg12879425 | 0.0866 | 0.0913 | 0.0711 | 0.0772 | 0.0712 | 0.0750 | 0.0587 | 0.0721 | 0.0912 | 0.0861 | 0.0956 | 0.1068 | 0.0924 | 0.0982 |
| 418 | cg12952132 | 0.7150 | 0.6242 | 0.7222 | 0.7637 | 0.7683 | 0.7361 | 0.7677 | 0.7018 | 0.7444 | 0.7245 | 0.7855 | 0.7952 | 0.7591 | 0.7602 |
| 419 | cg12958813 | 0.7962 | 0.8426 | 0.8443 | 0.8388 | 0.8128 | 0.8471 | 0.8276 | 0.7991 | 0.8358 | 0.8480 | 0.8480 | 0.8395 | 0.8526 | 0.8151 |
| 420 | cg12966875 | 0.2017 | 0.2291 | 0.2123 | 0.2804 | 0.3871 | 0.1920 | 0.2181 | 0.2533 | 0.2727 | 0.2648 | 0.2887 | 0.3802 | 0.1795 | 0.2000 |
| 421 | cg12969407 | 0.1180 | 0.0979 | 0.0988 | 0.1045 | 0.0891 | 0.0902 | 0.0780 | 0.1080 | 0.1025 | 0.0922 | 0.0858 | 0.1153 | 0.0891 | 0.1313 |
| 422 | cg13002506 | 0.8720 | 0.8882 | 0.8989 | 0.8855 | 0.8769 | 0.8761 | 0.8855 | 0.8769 | 0.8736 | 0.8848 | 0.8742 | 0.8810 | 0.8884 | 0.8268 |
| 423 | cg13007988 | 0.7621 | 0.7842 | 0.8007 | 0.7813 | 0.7371 | 0.7710 | 0.8042 | 0.7954 | 0.8004 | 0.7771 | 0.8014 | 0.7697 | 0.8102 | 0.6944 |
| 424 | cg13041032 | 0.8456 | 0.8882 | 0.8865 | 0.8652 | 0.8723 | 0.8809 | 0.8689 | 0.8748 | 0.8815 | 0.8833 | 0.8720 | 0.8885 | 0.9015 | 0.8488 |
| 425 | cg13044277 | 0.1914 | 0.1567 | 0.1348 | 0.1431 | 0.1550 | 0.1592 | 0.1636 | 0.1927 | 0.1570 | 0.1659 | 0.1736 | 0.1614 | 0.1843 | 0.2088 |
| 426 | cg13055278 | 0.3570 | 0.3708 | 0.3659 | 0.3430 | 0.3489 | 0.0620 | 0.3243 | 0.4868 | 0.4977 | 0.0820 | 0.0864 | 0.0890 | 0.3532 | 0.0748 |
| 427 | cg13059335 | 0.7744 | 0.7889 | 0.8203 | 0.7852 | 0.8062 | 0.7709 | 0.8061 | 0.7908 | 0.7846 | 0.7837 | 0.8134 | 0.7768 | 0.7769 | 0.7393 |
| 428 | cg13077930 | 0.7057 | 0.7599 | 0.7704 | 0.7241 | 0.7510 | 0.7671 | 0.7623 | 0.7589 | 0.7478 | 0.7410 | 0.7250 | 0.7328 | 0.7547 | 0.7261 |
| 429 | cg13086586 | 0.3027 | 0.4421 | 0.3201 | 0.3296 | 0.2799 | 0.3420 | 0.2838 | 0.3229 | 0.4177 | 0.4257 | 0.4675 | 0.4286 | 0.3499 | 0.3296 |
| 430 | cg13109289 | 0.8251 | 0.8401 | 0.8551 | 0.8340 | 0.8364 | 0.8491 | 0.8488 | 0.8364 | 0.8153 | 0.8289 | 0.8466 | 0.8095 | 0.8462 | 0.7991 |
| 431 | cg13119609 | 0.5279 | 0.6933 | 0.6039 | 0.4965 | 0.7790 | 0.7221 | 0.6260 | 0.7505 | 0.7212 | 0.7285 | 0.6166 | 0.7398 | 0.7329 | 0.6766 |
| 432 | cg13120814 | 0.1266 | 0.0834 | 0.0814 | 0.0836 | 0.0804 | 0.0843 | 0.0958 | 0.0956 | 0.0828 | 0.0830 | 0.0967 | 0.1186 | 0.0820 | 0.1332 |
| 433 | cg13131015 | 0.7244 | 0.7915 | 0.8124 | 0.7860 | 0.8366 | 0.7883 | 0.8331 | 0.7367 | 0.8190 | 0.7833 | 0.7910 | 0.7963 | 0.8385 | 0.7626 |
| 434 | cg13140740 | 0.2204 | 0.3142 | 0.2645 | 0.2508 | 0.2535 | 0.2204 | 0.2458 | 0.2523 | 0.2331 | 0.2775 | 0.2708 | 0.2532 | 0.2867 | 0.2226 |
| 435 | cg13149996 | 0.8025 | 0.8634 | 0.8503 | 0.8230 | 0.8409 | 0.8459 | 0.8231 | 0.8354 | 0.8286 | 0.8560 | 0.8495 | 0.8582 | 0.8228 | 0.7799 |
| 436 | cg13168374 | 0.8546 | 0.8797 | 0.8986 | 0.8771 | 0.8797 | 0.8792 | 0.8626 | 0.8803 | 0.8764 | 0.8727 | 0.8515 | 0.8765 | 0.8662 | 0.8283 |
| 437 | cg13217373 | 0.7269 | 0.7871 | 0.7257 | 0.7211 | 0.8035 | 0.7459 | 0.7611 | 0.7401 | 0.7235 | 0.7702 | 0.7263 | 0.7557 | 0.7485 | 0.7338 |
| 438 | cg13235447 | 0.2031 | 0.1757 | 0.1246 | 0.1538 | 0.1692 | 0.1508 | 0.1701 | 0.1460 | 0.1719 | 0.1587 | 0.1989 | 0.2147 | 0.1861 | 0.1807 |
| 439 | cg13281868 | 0.8788 | 0.8827 | 0.8867 | 0.8708 | 0.8733 | 0.8478 | 0.8590 | 0.8499 | 0.8644 | 0.8687 | 0.8328 | 0.8295 | 0.8396 | 0.8261 |
| 440 | cg13302154 | 0.5454 | 0.5589 | 0.5670 | 0.5978 | 0.6177 | 0.6051 | 0.5561 | 0.6465 | 0.5673 | 0.5920 | 0.5892 | 0.6244 | 0.5694 | 0.5006 |
| 441 | cg13328485 | 0.7008 | 0.7581 | 0.7764 | 0.7193 | 0.7545 | 0.7352 | 0.7633 | 0.7535 | 0.7579 | 0.7912 | 0.7317 | 0.7374 | 0.7462 | 0.7159 |
| 442 | cg13334990 | 0.2076 | 0.2889 | 0.2213 | 0.1944 | 0.1938 | 0.2675 | 0.1648 | 0.1632 | 0.2602 | 0.2285 | 0.2633 | 0.3633 | 0.2562 | 0.3094 |
| 443 | cg13406768 | 0.8310 | 0.8509 | 0.8709 | 0.8359 | 0.8691 | 0.8461 | 0.8538 | 0.8389 | 0.8429 | 0.8522 | 0.8416 | 0.8446 | 0.8394 | 0.8297 |
| 444 | cg13410437 | 0.9057 | 0.8896 | 0.8982 | 0.9213 | 0.9003 | 0.9073 | 0.8962 | 0.8798 | 0.9107 | 0.8981 | 0.8963 | 0.9043 | 0.8957 | 0.8766 |
| 445 | cg13435792 | 0.7333 | 0.7275 | 0.6148 | 0.7693 | 0.6141 | 0.7535 | 0.7506 | 0.7834 | 0.6266 | 0.7884 | 0.6564 | 0.7577 | 0.6373 | 0.6342 |
| 446 | cg13436996 | 0.7925 | 0.8172 | 0.8241 | 0.7670 | 0.8088 | 0.7908 | 0.8127 | 0.8154 | 0.8261 | 0.7935 | 0.8201 | 0.7856 | 0.7772 | 0.7607 |
| 447 | cg13442811 | 0.6287 | 0.6739 | 0.7039 | 0.6344 | 0.6530 | 0.6569 | 0.6994 | 0.6692 | 0.7024 | 0.6579 | 0.6351 | 0.6480 | 0.6586 | 0.6292 |
| 448 | cg13445249 | 0.7127 | 0.7400 | 0.7316 | 0.7443 | 0.7198 | 0.6899 | 0.7264 | 0.7303 | 0.7317 | 0.7393 | 0.7241 | 0.7239 | 0.7301 | 0.7022 |
| 449 | cg13459560 | 0.7805 | 0.7944 | 0.8253 | 0.7697 | 0.8151 | 0.7590 | 0.7344 | 0.8104 | 0.7821 | 0.8049 | 0.7613 | 0.7646 | 0.7443 | 0.7386 |
| 450 | cg13463167 | 0.8308 | 0.8327 | 0.8417 | 0.7978 | 0.8321 | 0.8195 | 0.8274 | 0.8445 | 0.8305 | 0.8417 | 0.8271 | 0.8344 | 0.8225 | 0.7798 |
| 451 | cg13496066 | 0.8123 | 0.8293 | 0.8501 | 0.8061 | 0.8183 | 0.8336 | 0.8330 | 0.8302 | 0.8353 | 0.8468 | 0.8303 | 0.8486 | 0.8455 | 0.7834 |
| 452 | cg13507429 | 0.8629 | 0.6761 | 0.7202 | 0.6481 | 0.7918 | 0.6121 | 0.7042 | 0.6174 | 0.5429 | 0.6162 | 0.7924 | 0.6534 | 0.6752 | 0.8178 |
| 453 | cg13523386 | 0.8343 | 0.8478 | 0.8725 | 0.8440 | 0.8305 | 0.8429 | 0.8028 | 0.8249 | 0.8454 | 0.8505 | 0.8356 | 0.8464 | 0.8372 | 0.7894 |
| 454 | cg13580728 | 0.7085 | 0.8023 | 0.8251 | 0.7438 | 0.8095 | 0.7699 | 0.7890 | 0.7883 | 0.8065 | 0.7557 | 0.7570 | 0.7635 | 0.7409 | 0.7636 |
| 455 | cg13629753 | 0.1680 | 0.1187 | 0.1102 | 0.1337 | 0.1097 | 0.0991 | 0.1020 | 0.1229 | 0.1415 | 0.1176 | 0.1149 | 0.1095 | 0.1132 | 0.1759 |
| 456 | cg13673094 | 0.1467 | 0.1149 | 0.1073 | 0.1335 | 0.1350 | 0.1150 | 0.1291 | 0.1135 | 0.1439 | 0.1586 | 0.1302 | 0.1707 | 0.1376 | 0.1494 |
| 457 | cg13703941 | 0.7846 | 0.8037 | 0.8305 | 0.7764 | 0.8274 | 0.8037 | 0.8132 | 0.8087 | 0.8227 | 0.7585 | 0.7942 | 0.8182 | 0.7766 | 0.7576 |

|     |            |        |        |        |        |        |        |        |        |        |        |        |        |        |        |
|-----|------------|--------|--------|--------|--------|--------|--------|--------|--------|--------|--------|--------|--------|--------|--------|
| 458 | cg13759778 | 0.7807 | 0.8274 | 0.8205 | 0.8190 | 0.8339 | 0.8236 | 0.8229 | 0.8025 | 0.8349 | 0.8346 | 0.8215 | 0.8205 | 0.8021 | 0.7999 |
| 459 | cg13771579 | 0.8940 | 0.7331 | 0.7821 | 0.7301 | 0.7564 | 0.7008 | 0.8722 | 0.7715 | 0.7166 | 0.7337 | 0.6999 | 0.7235 | 0.9023 | 0.7312 |
| 460 | cg13817266 | 0.3919 | 0.3062 | 0.3632 | 0.4600 | 0.4586 | 0.4396 | 0.5264 | 0.4750 | 0.4987 | 0.4603 | 0.4873 | 0.4416 | 0.3765 | 0.4590 |
| 461 | cg13943564 | 0.7270 | 0.7630 | 0.7814 | 0.7483 | 0.7791 | 0.7700 | 0.7902 | 0.7515 | 0.7946 | 0.7407 | 0.7479 | 0.7621 | 0.7611 | 0.7143 |
| 462 | cg13968390 | 0.8296 | 0.8320 | 0.6815 | 0.8217 | 0.8503 | 0.8262 | 0.8585 | 0.8293 | 0.8345 | 0.6622 | 0.8415 | 0.8321 | 0.8316 | 0.8247 |
| 463 | cg13980719 | 0.6597 | 0.7227 | 0.6712 | 0.6530 | 0.7270 | 0.6878 | 0.7059 | 0.7040 | 0.7596 | 0.6737 | 0.6986 | 0.7487 | 0.6907 | 0.6900 |
| 464 | cg13980834 | 0.8406 | 0.8646 | 0.8615 | 0.8556 | 0.8778 | 0.8679 | 0.8809 | 0.8350 | 0.8593 | 0.8665 | 0.8541 | 0.8339 | 0.8357 | 0.8397 |
| 465 | cg13986618 | 0.7976 | 0.8155 | 0.8339 | 0.7871 | 0.7961 | 0.8010 | 0.8010 | 0.8130 | 0.8134 | 0.7910 | 0.8027 | 0.7891 | 0.7868 | 0.7591 |
| 466 | cg13995453 | 0.7675 | 0.8175 | 0.7977 | 0.7353 | 0.8198 | 0.8154 | 0.7944 | 0.7529 | 0.8285 | 0.7959 | 0.7978 | 0.7915 | 0.7957 | 0.7392 |
| 467 | cg14009688 | 0.5946 | 0.5734 | 0.4996 | 0.5170 | 0.6135 | 0.5358 | 0.6270 | 0.5607 | 0.5813 | 0.5230 | 0.5287 | 0.6122 | 0.6238 | 0.5515 |
| 468 | cg14069619 | 0.8066 | 0.8363 | 0.8592 | 0.8245 | 0.8226 | 0.8515 | 0.8285 | 0.8010 | 0.8533 | 0.8641 | 0.8499 | 0.8694 | 0.8391 | 0.7562 |
| 469 | cg14088161 | 0.7620 | 0.7396 | 0.6934 | 0.7151 | 0.7438 | 0.7221 | 0.7053 | 0.7363 | 0.7446 | 0.7302 | 0.7152 | 0.7470 | 0.7324 | 0.7624 |
| 470 | cg14119236 | 0.3988 | 0.3926 | 0.4020 | 0.4894 | 0.5153 | 0.4459 | 0.4566 | 0.4844 | 0.4927 | 0.4328 | 0.3669 | 0.4527 | 0.4527 | 0.4571 |
| 471 | cg14143055 | 0.7554 | 0.7799 | 0.8021 | 0.7730 | 0.7765 | 0.7624 | 0.7756 | 0.7784 | 0.7873 | 0.7712 | 0.8082 | 0.7819 | 0.7885 | 0.7502 |
| 472 | cg14154330 | 0.6604 | 0.5816 | 0.5408 | 0.6395 | 0.6864 | 0.6229 | 0.6257 | 0.6551 | 0.5709 | 0.6278 | 0.5385 | 0.5897 | 0.6028 | 0.6179 |
| 473 | cg14159672 | 0.5372 | 0.4619 | 0.4513 | 0.4854 | 0.1307 | 0.1551 | 0.8963 | 0.0601 | 0.1368 | 0.5289 | 0.8202 | 0.4570 | 0.4721 | 0.8803 |
| 474 | cg14191109 | 0.0634 | 0.0534 | 0.0764 | 0.0780 | 0.0546 | 0.0349 | 0.0397 | 0.0482 | 0.0639 | 0.0552 | 0.0477 | 0.0490 | 0.0751 | 0.0340 |
| 475 | cg14209870 | 0.9227 | 0.8934 | 0.9137 | 0.9221 | 0.9102 | 0.9130 | 0.9023 | 0.9135 | 0.9047 | 0.9007 | 0.9187 | 0.9146 | 0.9116 | 0.8870 |
| 476 | cg14252059 | 0.8212 | 0.8419 | 0.8163 | 0.8205 | 0.8151 | 0.8137 | 0.8265 | 0.8134 | 0.8318 | 0.8444 | 0.8208 | 0.8399 | 0.8418 | 0.7741 |
| 477 | cg14260643 | 0.4890 | 0.5113 | 0.5414 | 0.5458 | 0.5795 | 0.5602 | 0.5482 | 0.6251 | 0.4924 | 0.4775 | 0.5178 | 0.4976 | 0.5382 | 0.5519 |
| 478 | cg14301635 | 0.7736 | 0.8129 | 0.8013 | 0.7861 | 0.8091 | 0.8125 | 0.8230 | 0.7705 | 0.8187 | 0.7667 | 0.7929 | 0.7774 | 0.7952 | 0.6906 |
| 479 | cg14332079 | 0.2160 | 0.0507 | 0.0362 | 0.0352 | 0.0406 | 0.2267 | 0.0235 | 0.0434 | 0.1605 | 0.0501 | 0.0500 | 0.0454 | 0.2019 | 0.0407 |
| 480 | cg14367014 | 0.7587 | 0.7571 | 0.7606 | 0.7433 | 0.7699 | 0.7413 | 0.7732 | 0.7080 | 0.7648 | 0.7759 | 0.7221 | 0.7692 | 0.7166 | 0.7135 |
| 481 | cg14371329 | 0.8690 | 0.8813 | 0.9003 | 0.8607 | 0.8889 | 0.8883 | 0.8906 | 0.9000 | 0.8540 | 0.8637 | 0.8611 | 0.8451 | 0.8483 | 0.8546 |
| 482 | cg14379865 | 0.8610 | 0.8841 | 0.8776 | 0.8788 | 0.8546 | 0.8719 | 0.8599 | 0.8476 | 0.8779 | 0.8944 | 0.8776 | 0.8795 | 0.8785 | 0.8579 |
| 483 | cg14401592 | 0.7003 | 0.7625 | 0.8018 | 0.7467 | 0.7752 | 0.7573 | 0.7657 | 0.7562 | 0.7716 | 0.7234 | 0.7291 | 0.7519 | 0.7609 | 0.7380 |
| 484 | cg14444244 | 0.8220 | 0.8542 | 0.8523 | 0.8324 | 0.8463 | 0.8484 | 0.8611 | 0.8571 | 0.8486 | 0.8425 | 0.8421 | 0.8430 | 0.8390 | 0.8197 |
| 485 | cg14458615 | 0.8275 | 0.8359 | 0.8221 | 0.8104 | 0.8418 | 0.8305 | 0.8252 | 0.8132 | 0.8113 | 0.8081 | 0.8208 | 0.8151 | 0.8458 | 0.8327 |
| 486 | cg14462830 | 0.7594 | 0.7861 | 0.8067 | 0.7856 | 0.7854 | 0.7558 | 0.7911 | 0.7762 | 0.7761 | 0.7861 | 0.7766 | 0.7722 | 0.7585 | 0.7143 |
| 487 | cg14469290 | 0.8319 | 0.8463 | 0.8735 | 0.8559 | 0.8571 | 0.8662 | 0.8671 | 0.8528 | 0.8543 | 0.8429 | 0.8473 | 0.8429 | 0.8416 | 0.8229 |
| 488 | cg14613546 | 0.7771 | 0.8184 | 0.8316 | 0.8223 | 0.8252 | 0.8096 | 0.8070 | 0.7708 | 0.8140 | 0.8304 | 0.8218 | 0.8013 | 0.7734 | 0.7469 |
| 489 | cg14662172 | 0.7875 | 0.8007 | 0.8034 | 0.8075 | 0.8129 | 0.8129 | 0.8066 | 0.7546 | 0.8228 | 0.8077 | 0.8030 | 0.8117 | 0.7940 | 0.7611 |
| 490 | cg14758526 | 0.8464 | 0.8653 | 0.8730 | 0.8470 | 0.8500 | 0.8555 | 0.8417 | 0.8586 | 0.8590 | 0.8485 | 0.8528 | 0.8131 | 0.8395 | 0.8420 |
| 491 | cg14787704 | 0.7709 | 0.7876 | 0.8086 | 0.7841 | 0.8163 | 0.7841 | 0.8001 | 0.7751 | 0.7862 | 0.8015 | 0.8206 | 0.7967 | 0.8201 | 0.7625 |
| 492 | cg14826456 | 0.2397 | 0.2042 | 0.2111 | 0.1943 | 0.1849 | 0.1854 | 0.1623 | 0.1782 | 0.1989 | 0.2047 | 0.1793 | 0.2122 | 0.1805 | 0.1429 |
| 493 | cg14834436 | 0.0987 | 0.1027 | 0.0730 | 0.1097 | 0.1119 | 0.1105 | 0.0970 | 0.1075 | 0.1159 | 0.1153 | 0.1066 | 0.1056 | 0.1098 | 0.1582 |
| 494 | cg14837082 | 0.7841 | 0.7918 | 0.8252 | 0.7980 | 0.8031 | 0.8199 | 0.8062 | 0.7956 | 0.7977 | 0.7994 | 0.7969 | 0.7739 | 0.7866 | 0.7458 |
| 495 | cg14893161 | 0.6364 | 0.6102 | 0.5723 | 0.5924 | 0.2495 | 0.3136 | 0.8982 | 0.0898 | 0.2270 | 0.6278 | 0.8525 | 0.5954 | 0.5916 | 0.9135 |
| 496 | cg14898892 | 0.7906 | 0.8192 | 0.8395 | 0.7963 | 0.8404 | 0.8267 | 0.8306 | 0.7880 | 0.8300 | 0.8292 | 0.8132 | 0.8306 | 0.8029 | 0.7896 |
| 497 | cg14917512 | 0.2076 | 0.2278 | 0.0974 | 0.1133 | 0.2355 | 0.2011 | 0.0833 | 0.0873 | 0.2590 | 0.3038 | 0.2422 | 0.2079 | 0.2047 | 0.0651 |
| 498 | cg14932684 | 0.0288 | 0.0582 | 0.0279 | 0.0276 | 0.0285 | 0.0268 | 0.0296 | 0.0276 | 0.0407 | 0.0480 | 0.0373 | 0.0369 | 0.0470 | 0.0250 |
| 499 | cg15133917 | 0.7779 | 0.7864 | 0.8011 | 0.7569 | 0.7949 | 0.7444 | 0.8015 | 0.7829 | 0.7836 | 0.7731 | 0.7749 | 0.7461 | 0.7689 | 0.7327 |
| 500 | cg15201291 | 0.8361 | 0.8617 | 0.9028 | 0.8624 | 0.8769 | 0.8739 | 0.8600 | 0.8711 | 0.8863 | 0.8592 | 0.8593 | 0.8536 | 0.8539 | 0.8502 |
| 501 | cg15264273 | 0.8593 | 0.8764 | 0.8743 | 0.8704 | 0.8615 | 0.8692 | 0.8717 | 0.8598 | 0.8792 | 0.8548 | 0.8505 | 0.8514 | 0.8517 | 0.8305 |
| 502 | cg15298545 | 0.7824 | 0.7818 | 0.8042 | 0.8048 | 0.8134 | 0.8371 | 0.8192 | 0.8118 | 0.7830 | 0.7860 | 0.7744 | 0.8091 | 0.7932 | 0.6820 |
| 503 | cg15307449 | 0.6753 | 0.7738 | 0.7642 | 0.6998 | 0.7430 | 0.7358 | 0.7555 | 0.7383 | 0.7375 | 0.7661 | 0.7474 | 0.7691 | 0.7308 | 0.6865 |
| 504 | cg15308737 | 0.8191 | 0.8831 | 0.8933 | 0.8663 | 0.9132 | 0.8917 | 0.9149 | 0.8740 | 0.8849 | 0.9028 | 0.8986 | 0.9204 | 0.8346 | 0.8681 |
| 505 | cg15309578 | 0.6907 | 0.7463 | 0.7489 | 0.7154 | 0.6874 | 0.7273 | 0.7500 | 0.7091 | 0.7258 | 0.7284 | 0.7237 | 0.7104 | 0.6804 | 0.6787 |
| 506 | cg15310162 | 0.8174 | 0.8584 | 0.8501 | 0.8393 | 0.8534 | 0.8450 | 0.8330 | 0.8468 | 0.8499 | 0.8405 | 0.8460 | 0.8337 | 0.8405 | 0.8006 |
| 507 | cg15312323 | 0.6059 | 0.6110 | 0.6383 | 0.6069 | 0.6650 | 0.6336 | 0.6218 | 0.6090 | 0.6158 | 0.5984 | 0.6009 | 0.5678 | 0.5991 | 0.5026 |
| 508 | cg15329866 | 0.8453 | 0.8485 | 0.8645 | 0.8331 | 0.8316 | 0.8458 | 0.8448 | 0.8166 | 0.8534 | 0.8457 | 0.8635 | 0.8355 | 0.8621 | 0.8226 |
| 509 | cg15364618 | 0.3956 | 0.3709 | 0.2598 | 0.3486 | 0.5066 | 0.3040 | 0.5478 | 0.4766 | 0.3364 | 0.2086 | 0.3308 | 0.3069 | 0.3519 | 0.3303 |

|     |            |        |        |        |        |        |        |        |        |        |        |        |        |        |        |
|-----|------------|--------|--------|--------|--------|--------|--------|--------|--------|--------|--------|--------|--------|--------|--------|
| 510 | cg15383120 | 0.6896 | 0.5889 | 0.6373 | 0.6385 | 0.0738 | 0.6376 | 0.4616 | 0.6630 | 0.5809 | 0.5706 | 0.4848 | 0.6740 | 0.6066 | 0.5801 |
| 511 | cg15398520 | 0.8185 | 0.8539 | 0.8302 | 0.8369 | 0.8366 | 0.8236 | 0.8310 | 0.8170 | 0.8279 | 0.8479 | 0.8383 | 0.8403 | 0.8324 | 0.7943 |
| 512 | cg15403517 | 0.3142 | 0.3721 | 0.2818 | 0.2459 | 0.3538 | 0.1900 | 0.1618 | 0.3235 | 0.1740 | 0.4290 | 0.3122 | 0.3211 | 0.2627 | 0.3430 |
| 513 | cg15408407 | 0.0373 | 0.0494 | 0.0240 | 0.0188 | 0.0290 | 0.0195 | 0.0211 | 0.0197 | 0.0358 | 0.0277 | 0.0342 | 0.0316 | 0.0430 | 0.0219 |
| 514 | cg15417244 | 0.8968 | 0.8528 | 0.9045 | 0.8591 | 0.8963 | 0.8943 | 0.8947 | 0.9015 | 0.8515 | 0.8485 | 0.8423 | 0.8712 | 0.8847 | 0.8477 |
| 515 | cg15489422 | 0.7843 | 0.8180 | 0.8237 | 0.7811 | 0.8242 | 0.8060 | 0.8216 | 0.8247 | 0.8160 | 0.8169 | 0.7965 | 0.8019 | 0.7994 | 0.7444 |
| 516 | cg15527554 | 0.7971 | 0.8060 | 0.8360 | 0.8203 | 0.8075 | 0.8383 | 0.8277 | 0.8267 | 0.8210 | 0.8237 | 0.8190 | 0.8177 | 0.7835 | 0.7401 |
| 517 | cg15543551 | 0.1812 | 0.1716 | 0.2768 | 0.2653 | 0.3043 | 0.3110 | 0.2710 | 0.3336 | 0.2835 | 0.1784 | 0.1684 | 0.1768 | 0.1560 | 0.2004 |
| 518 | cg15559700 | 0.7880 | 0.8286 | 0.8600 | 0.8277 | 0.8119 | 0.8370 | 0.8186 | 0.8223 | 0.8331 | 0.8061 | 0.7832 | 0.8256 | 0.8225 | 0.7803 |
| 519 | cg15583072 | 0.7246 | 0.7348 | 0.7635 | 0.7191 | 0.7512 | 0.7134 | 0.7420 | 0.7318 | 0.7359 | 0.7794 | 0.7633 | 0.7574 | 0.7386 | 0.6811 |
| 520 | cg15610233 | 0.7921 | 0.8161 | 0.8371 | 0.8030 | 0.8312 | 0.8222 | 0.8148 | 0.8049 | 0.8277 | 0.8222 | 0.8017 | 0.8052 | 0.8147 | 0.7622 |
| 521 | cg15612847 | 0.8430 | 0.8556 | 0.8797 | 0.8724 | 0.8598 | 0.8695 | 0.8764 | 0.8077 | 0.8650 | 0.8511 | 0.8751 | 0.8418 | 0.8243 | 0.7945 |
| 522 | cg15661409 | 0.8265 | 0.8475 | 0.8452 | 0.8348 | 0.8461 | 0.8589 | 0.8462 | 0.8276 | 0.8509 | 0.8361 | 0.8376 | 0.8470 | 0.8398 | 0.8323 |
| 523 | cg15684563 | 0.7984 | 0.7606 | 0.7856 | 0.7699 | 0.7960 | 0.7932 | 0.7745 | 0.7815 | 0.7746 | 0.7598 | 0.7675 | 0.7950 | 0.7862 | 0.7188 |
| 524 | cg15691649 | 0.8979 | 0.8544 | 0.6952 | 0.8471 | 0.8555 | 0.8407 | 0.8482 | 0.8244 | 0.6875 | 0.8274 | 0.7469 | 0.7563 | 0.8424 | 0.8123 |
| 525 | cg15722679 | 0.1360 | 0.2005 | 0.1335 | 0.1294 | 0.1346 | 0.1328 | 0.1123 | 0.1037 | 0.1492 | 0.1840 | 0.2041 | 0.1819 | 0.1932 | 0.1962 |
| 526 | cg15740508 | 0.8091 | 0.8211 | 0.8540 | 0.8235 | 0.8288 | 0.8235 | 0.8238 | 0.8183 | 0.8201 | 0.8200 | 0.8119 | 0.8040 | 0.8005 | 0.7902 |
| 527 | cg15741583 | 0.6340 | 0.6157 | 0.6562 | 0.6285 | 0.6858 | 0.6340 | 0.6944 | 0.6826 | 0.6834 | 0.6240 | 0.6370 | 0.6342 | 0.6135 | 0.6027 |
| 528 | cg15761405 | 0.7492 | 0.7793 | 0.7676 | 0.7791 | 0.7718 | 0.7623 | 0.7680 | 0.7473 | 0.7614 | 0.7463 | 0.7972 | 0.7785 | 0.7608 | 0.7646 |
| 529 | cg15798153 | 0.7779 | 0.8014 | 0.7232 | 0.7028 | 0.7943 | 0.7993 | 0.6993 | 0.6654 | 0.7966 | 0.7687 | 0.7333 | 0.7692 | 0.7983 | 0.7478 |
| 530 | cg15811427 | 0.7680 | 0.7851 | 0.7835 | 0.7858 | 0.8105 | 0.7828 | 0.7827 | 0.7804 | 0.8070 | 0.7945 | 0.8060 | 0.8030 | 0.8025 | 0.7492 |
| 531 | cg15842430 | 0.8318 | 0.8255 | 0.8720 | 0.8247 | 0.8474 | 0.8359 | 0.8295 | 0.8273 | 0.8280 | 0.8589 | 0.8230 | 0.8362 | 0.8407 | 0.7942 |
| 532 | cg15847988 | 0.8612 | 0.8656 | 0.9022 | 0.8604 | 0.8698 | 0.8712 | 0.8637 | 0.8380 | 0.8786 | 0.8761 | 0.8696 | 0.8708 | 0.8686 | 0.8476 |
| 533 | cg15869022 | 0.5839 | 0.5026 | 0.5001 | 0.4566 | 0.5038 | 0.4729 | 0.6391 | 0.4933 | 0.5224 | 0.4846 | 0.5663 | 0.4902 | 0.5145 | 0.5459 |
| 534 | cg15876417 | 0.1586 | 0.1547 | 0.1407 | 0.1456 | 0.1551 | 0.1648 | 0.1616 | 0.1782 | 0.1507 | 0.1523 | 0.1666 | 0.1728 | 0.1379 | 0.1570 |
| 535 | cg15905979 | 0.7985 | 0.7948 | 0.8316 | 0.7866 | 0.8008 | 0.8198 | 0.7847 | 0.8026 | 0.8110 | 0.8345 | 0.7959 | 0.8240 | 0.7930 | 0.7046 |
| 536 | cg16019620 | 0.8460 | 0.8621 | 0.8736 | 0.8493 | 0.8476 | 0.8652 | 0.8559 | 0.8518 | 0.8743 | 0.8562 | 0.8598 | 0.8592 | 0.8707 | 0.8352 |
| 537 | cg16041611 | 0.0269 | 0.0831 | 0.0428 | 0.0457 | 0.0625 | 0.0481 | 0.0338 | 0.0262 | 0.0709 | 0.0592 | 0.0691 | 0.0415 | 0.0778 | 0.0192 |
| 538 | cg16068780 | 0.8649 | 0.8721 | 0.8798 | 0.8698 | 0.8733 | 0.8883 | 0.8844 | 0.7410 | 0.7378 | 0.8868 | 0.8686 | 0.8714 | 0.8855 | 0.8395 |
| 539 | cg16080552 | 0.3819 | 0.3402 | 0.1296 | 0.5446 | 0.4563 | 0.3542 | 0.6520 | 0.3212 | 0.3593 | 0.4835 | 0.3632 | 0.1843 | 0.5228 | 0.5597 |
| 540 | cg16098726 | 0.7728 | 0.7697 | 0.7442 | 0.8152 | 0.8135 | 0.8042 | 0.8352 | 0.7570 | 0.7769 | 0.7813 | 0.7788 | 0.7997 | 0.8165 | 0.8207 |
| 541 | cg16106497 | 0.8811 | 0.8406 | 0.7070 | 0.8278 | 0.8315 | 0.8851 | 0.7664 | 0.9265 | 0.6952 | 0.8166 | 0.4439 | 0.3041 | 0.6883 | 0.8683 |
| 542 | cg16219122 | 0.5084 | 0.5607 | 0.5987 | 0.5350 | 0.6621 | 0.6216 | 0.5662 | 0.6327 | 0.5518 | 0.4655 | 0.5142 | 0.4547 | 0.4794 | 0.5880 |
| 543 | cg16250754 | 0.1935 | 0.1897 | 0.1642 | 0.2247 | 0.1809 | 0.1626 | 0.1523 | 0.1986 | 0.1947 | 0.1700 | 0.1608 | 0.1859 | 0.1613 | 0.2223 |
| 544 | cg16290693 | 0.0516 | 0.1528 | 0.0870 | 0.0766 | 0.1484 | 0.0791 | 0.1063 | 0.1226 | 0.1369 | 0.0955 | 0.1383 | 0.0646 | 0.0891 | 0.0459 |
| 545 | cg16360372 | 0.8726 | 0.8378 | 0.8727 | 0.8778 | 0.8693 | 0.8787 | 0.8801 | 0.8806 | 0.8461 | 0.8518 | 0.8512 | 0.8672 | 0.8635 | 0.8407 |
| 546 | cg16386158 | 0.7006 | 0.7534 | 0.7676 | 0.7568 | 0.7645 | 0.7651 | 0.7661 | 0.7718 | 0.7275 | 0.6931 | 0.7136 | 0.7721 | 0.7239 | 0.7839 |
| 547 | cg16398289 | 0.8165 | 0.8493 | 0.8443 | 0.8038 | 0.8209 | 0.8177 | 0.8410 | 0.8408 | 0.8394 | 0.8532 | 0.8338 | 0.8473 | 0.8493 | 0.7452 |
| 548 | cg16404106 | 0.3817 | 0.2765 | 0.3204 | 0.4098 | 0.3397 | 0.4320 | 0.3599 | 0.3020 | 0.2953 | 0.3881 | 0.4473 | 0.4639 | 0.4656 | 0.2089 |
| 549 | cg16415646 | 0.8069 | 0.7924 | 0.8589 | 0.8174 | 0.8099 | 0.8184 | 0.8254 | 0.8455 | 0.8007 | 0.8286 | 0.8114 | 0.8129 | 0.7771 | 0.7150 |
| 550 | cg16474696 | 0.0704 | 0.7300 | 0.5993 | 0.7029 | 0.3369 | 0.6930 | 0.6959 | 0.0546 | 0.0412 | 0.4053 | 0.0700 | 0.1711 | 0.0874 | 0.1418 |
| 551 | cg16505550 | 0.8080 | 0.8058 | 0.8029 | 0.7779 | 0.8056 | 0.8208 | 0.8151 | 0.7701 | 0.8188 | 0.8122 | 0.7958 | 0.7978 | 0.8025 | 0.7074 |
| 552 | cg16506346 | 0.7736 | 0.7931 | 0.8291 | 0.8029 | 0.8006 | 0.8140 | 0.8062 | 0.7798 | 0.7930 | 0.7958 | 0.7982 | 0.7951 | 0.7587 | 0.7704 |
| 553 | cg16593081 | 0.9100 | 0.9119 | 0.9332 | 0.9113 | 0.9307 | 0.9168 | 0.9298 | 0.9301 | 0.9096 | 0.9157 | 0.9116 | 0.9089 | 0.9061 | 0.8919 |
| 554 | cg16625901 | 0.7097 | 0.6909 | 0.7574 | 0.7163 | 0.7141 | 0.7004 | 0.7349 | 0.7557 | 0.7342 | 0.7147 | 0.7080 | 0.7001 | 0.7321 | 0.6509 |
| 555 | cg16627949 | 0.7018 | 0.7749 | 0.7394 | 0.7158 | 0.7636 | 0.7155 | 0.7536 | 0.7272 | 0.7625 | 0.7334 | 0.7464 | 0.7790 | 0.7769 | 0.7574 |
| 556 | cg16636571 | 0.7864 | 0.8099 | 0.8090 | 0.7625 | 0.7913 | 0.8050 | 0.8010 | 0.8368 | 0.8242 | 0.7925 | 0.7923 | 0.8056 | 0.8090 | 0.7850 |
| 557 | cg16639595 | 0.8244 | 0.8491 | 0.8567 | 0.8370 | 0.8349 | 0.8278 | 0.8591 | 0.8592 | 0.8589 | 0.8491 | 0.8294 | 0.8370 | 0.8492 | 0.7946 |
| 558 | cg16650125 | 0.7335 | 0.7994 | 0.7971 | 0.7862 | 0.7845 | 0.7473 | 0.7871 | 0.7668 | 0.7836 | 0.7638 | 0.7740 | 0.7799 | 0.7793 | 0.7166 |
| 559 | cg16708623 | 0.7131 | 0.7313 | 0.6404 | 0.7068 | 0.7003 | 0.6810 | 0.6749 | 0.6957 | 0.6059 | 0.6786 | 0.6924 | 0.7322 | 0.7027 | 0.6759 |
| 560 | cg16708981 | 0.2621 | 0.2066 | 0.2191 | 0.2663 | 0.1905 | 0.2173 | 0.3811 | 0.2088 | 0.1693 | 0.1874 | 0.1889 | 0.2213 | 0.1973 | 0.1870 |
| 561 | cg16729794 | 0.6961 | 0.7011 | 0.7522 | 0.7073 | 0.7137 | 0.7219 | 0.7512 | 0.7163 | 0.7310 | 0.7413 | 0.7547 | 0.7199 | 0.7628 | 0.6753 |

|     |            |        |        |        |        |        |        |        |        |        |        |        |        |        |        |
|-----|------------|--------|--------|--------|--------|--------|--------|--------|--------|--------|--------|--------|--------|--------|--------|
| 562 | cg16753209 | 0.7365 | 0.7553 | 0.8054 | 0.7461 | 0.7901 | 0.7769 | 0.8007 | 0.7690 | 0.7952 | 0.7427 | 0.7877 | 0.7528 | 0.7564 | 0.7453 |
| 563 | cg16786458 | 0.5782 | 0.5398 | 0.5439 | 0.5505 | 0.5793 | 0.5830 | 0.5513 | 0.5092 | 0.5457 | 0.5426 | 0.5306 | 0.5988 | 0.4686 | 0.5131 |
| 564 | cg16794882 | 0.7492 | 0.8121 | 0.7797 | 0.7362 | 0.7532 | 0.7363 | 0.7822 | 0.7592 | 0.7976 | 0.7649 | 0.7746 | 0.7816 | 0.7948 | 0.7265 |
| 565 | cg16823701 | 0.7924 | 0.8326 | 0.8560 | 0.8404 | 0.8343 | 0.8332 | 0.8292 | 0.8065 | 0.8371 | 0.8335 | 0.8046 | 0.8086 | 0.8378 | 0.7842 |
| 566 | cg16855929 | 0.8211 | 0.8429 | 0.8464 | 0.8435 | 0.8531 | 0.8421 | 0.8490 | 0.8458 | 0.8507 | 0.8353 | 0.8503 | 0.8495 | 0.8456 | 0.8037 |
| 567 | cg16899306 | 0.8666 | 0.8481 | 0.8513 | 0.8416 | 0.8434 | 0.4770 | 0.4175 | 0.8639 | 0.8267 | 0.8497 | 0.8586 | 0.8362 | 0.8301 | 0.8445 |
| 568 | cg16907488 | 0.8601 | 0.8698 | 0.8819 | 0.8465 | 0.8702 | 0.8539 | 0.8784 | 0.8688 | 0.8607 | 0.8719 | 0.8507 | 0.8651 | 0.8761 | 0.8360 |
| 569 | cg16935075 | 0.6916 | 0.7414 | 0.7619 | 0.7312 | 0.7444 | 0.7371 | 0.7419 | 0.7356 | 0.7320 | 0.7020 | 0.7654 | 0.7480 | 0.7460 | 0.6861 |
| 570 | cg16957569 | 0.6341 | 0.7265 | 0.7061 | 0.6258 | 0.6705 | 0.6564 | 0.6901 | 0.6913 | 0.6921 | 0.6954 | 0.7121 | 0.7059 | 0.7055 | 0.6755 |
| 571 | cg16979445 | 0.8091 | 0.8589 | 0.8700 | 0.8517 | 0.8779 | 0.8521 | 0.8805 | 0.8730 | 0.8468 | 0.8484 | 0.8805 | 0.8695 | 0.8636 | 0.8296 |
| 572 | cg16986846 | 0.8106 | 0.6770 | 0.7918 | 0.7943 | 0.8269 | 0.7522 | 0.8400 | 0.8375 | 0.7375 | 0.6817 | 0.7415 | 0.7441 | 0.7225 | 0.7469 |
| 573 | cg16991589 | 0.4865 | 0.3994 | 0.3172 | 0.3399 | 0.4389 | 0.3195 | 0.3858 | 0.3486 | 0.3902 | 0.5403 | 0.4316 | 0.5528 | 0.4434 | 0.5107 |
| 574 | cg17001652 | 0.7482 | 0.7831 | 0.7594 | 0.7522 | 0.7691 | 0.7736 | 0.7549 | 0.7245 | 0.7677 | 0.7975 | 0.7945 | 0.7793 | 0.7462 | 0.7132 |
| 575 | cg17016000 | 0.8530 | 0.8553 | 0.8896 | 0.8469 | 0.8734 | 0.8939 | 0.8718 | 0.8508 | 0.8574 | 0.8731 | 0.8733 | 0.8644 | 0.8735 | 0.8484 |
| 576 | cg17041296 | 0.7755 | 0.8007 | 0.8098 | 0.7844 | 0.7913 | 0.7861 | 0.8055 | 0.8136 | 0.8127 | 0.7873 | 0.7907 | 0.8051 | 0.8052 | 0.7582 |
| 577 | cg17095279 | 0.8026 | 0.8461 | 0.8541 | 0.8311 | 0.8467 | 0.8383 | 0.8557 | 0.8411 | 0.8395 | 0.8630 | 0.8345 | 0.8414 | 0.8338 | 0.8054 |
| 578 | cg17099569 | 0.6700 | 0.7310 | 0.7229 | 0.7035 | 0.7066 | 0.7135 | 0.7412 | 0.7364 | 0.7469 | 0.7140 | 0.7112 | 0.7427 | 0.7151 | 0.6898 |
| 579 | cg17185639 | 0.8211 | 0.7744 | 0.8600 | 0.8286 | 0.8526 | 0.8642 | 0.8415 | 0.8704 | 0.8289 | 0.8007 | 0.8208 | 0.8342 | 0.7950 | 0.8233 |
| 580 | cg17214210 | 0.7583 | 0.7968 | 0.7317 | 0.7795 | 0.7835 | 0.7855 | 0.7934 | 0.7893 | 0.8117 | 0.7748 | 0.7497 | 0.7497 | 0.7565 | 0.7388 |
| 581 | cg17225169 | 0.8511 | 0.8748 | 0.8905 | 0.8789 | 0.8803 | 0.8799 | 0.8731 | 0.8854 | 0.8740 | 0.8660 | 0.8757 | 0.8625 | 0.8654 | 0.8604 |
| 582 | cg17233935 | 0.6887 | 0.7658 | 0.7247 | 0.7122 | 0.7488 | 0.7339 | 0.7428 | 0.7600 | 0.7480 | 0.7467 | 0.7276 | 0.7610 | 0.7596 | 0.7124 |
| 583 | cg17279839 | 0.1691 | 0.2060 | 0.3271 | 0.3722 | 0.2034 | 0.3151 | 0.3534 | 0.1638 | 0.2375 | 0.2368 | 0.2375 | 0.2487 | 0.3667 | 0.3217 |
| 584 | cg17281600 | 0.7867 | 0.8113 | 0.7960 | 0.7725 | 0.7871 | 0.7964 | 0.7920 | 0.7739 | 0.8257 | 0.7931 | 0.7708 | 0.7784 | 0.8094 | 0.7467 |
| 585 | cg17338258 | 0.7768 | 0.7670 | 0.7989 | 0.7857 | 0.8105 | 0.8226 | 0.8052 | 0.8505 | 0.7670 | 0.7575 | 0.7798 | 0.7319 | 0.7557 | 0.7759 |
| 586 | cg17348429 | 0.8521 | 0.7531 | 0.8432 | 0.8303 | 0.8605 | 0.8759 | 0.8520 | 0.8698 | 0.7747 | 0.7699 | 0.8015 | 0.8026 | 0.7776 | 0.8149 |
| 587 | cg17423978 | 0.8245 | 0.8400 | 0.8695 | 0.8310 | 0.8418 | 0.8282 | 0.8473 | 0.8215 | 0.8196 | 0.8333 | 0.8382 | 0.8295 | 0.8392 | 0.8053 |
| 588 | cg17439694 | 0.7670 | 0.7967 | 0.8130 | 0.7758 | 0.7964 | 0.7829 | 0.8031 | 0.8012 | 0.7963 | 0.7532 | 0.7936 | 0.7698 | 0.7887 | 0.7465 |
| 589 | cg17446142 | 0.8759 | 0.8962 | 0.9045 | 0.8843 | 0.8914 | 0.8958 | 0.9000 | 0.8997 | 0.8867 | 0.8773 | 0.8806 | 0.8872 | 0.8889 | 0.8327 |
| 590 | cg17480438 | 0.5789 | 0.6706 | 0.6515 | 0.6136 | 0.6513 | 0.6293 | 0.6617 | 0.6008 | 0.6355 | 0.6378 | 0.6437 | 0.6383 | 0.6819 | 0.6003 |
| 591 | cg17489451 | 0.7122 | 0.7305 | 0.7724 | 0.7178 | 0.7614 | 0.7006 | 0.7505 | 0.7282 | 0.7591 | 0.7492 | 0.6827 | 0.7238 | 0.7081 | 0.6680 |
| 592 | cg17496788 | 0.8389 | 0.8780 | 0.8776 | 0.8537 | 0.8550 | 0.8753 | 0.8589 | 0.8650 | 0.8627 | 0.8665 | 0.8409 | 0.8384 | 0.8670 | 0.7869 |
| 593 | cg17499294 | 0.8620 | 0.8532 | 0.8848 | 0.8312 | 0.8713 | 0.8767 | 0.8741 | 0.8689 | 0.8708 | 0.8626 | 0.8562 | 0.8594 | 0.8563 | 0.8329 |
| 594 | cg17503750 | 0.8002 | 0.8413 | 0.8557 | 0.8253 | 0.8013 | 0.8078 | 0.8299 | 0.8306 | 0.8153 | 0.7993 | 0.8228 | 0.8245 | 0.8137 | 0.7737 |
| 595 | cg17536071 | 0.6973 | 0.7295 | 0.7510 | 0.7163 | 0.7609 | 0.7267 | 0.6883 | 0.7340 | 0.7378 | 0.7403 | 0.7434 | 0.7115 | 0.7378 | 0.7014 |
| 596 | cg17571291 | 0.1844 | 0.5479 | 0.2257 | 0.2519 | 0.2428 | 0.3773 | 0.2364 | 0.1749 | 0.2365 | 0.2609 | 0.2105 | 0.2713 | 0.2194 | 0.1915 |
| 597 | cg17607024 | 0.7466 | 0.7929 | 0.7931 | 0.7566 | 0.7821 | 0.7767 | 0.7974 | 0.7666 | 0.8076 | 0.7863 | 0.8155 | 0.7944 | 0.7982 | 0.7101 |
| 598 | cg17607231 | 0.1629 | 0.1876 | 0.3346 | 0.2223 | 0.2655 | 0.1905 | 0.2719 | 0.1704 | 0.2399 | 0.1753 | 0.2613 | 0.3197 | 0.1778 | 0.2753 |
| 599 | cg17607973 | 0.0216 | 0.0898 | 0.1525 | 0.0559 | 0.0927 | 0.0692 | 0.0534 | 0.0629 | 0.1035 | 0.0902 | 0.0927 | 0.0672 | 0.0733 | 0.0649 |
| 600 | cg17630127 | 0.8927 | 0.8881 | 0.8896 | 0.8782 | 0.8964 | 0.8943 | 0.8790 | 0.9007 | 0.8732 | 0.8722 | 0.8657 | 0.8839 | 0.8758 | 0.8366 |
| 601 | cg17685150 | 0.8383 | 0.8460 | 0.8568 | 0.8594 | 0.8597 | 0.8428 | 0.8567 | 0.8282 | 0.8467 | 0.8657 | 0.8540 | 0.8373 | 0.8531 | 0.8110 |
| 602 | cg17711541 | 0.5290 | 0.4843 | 0.3457 | 0.4801 | 0.4911 | 0.4684 | 0.4816 | 0.4303 | 0.3327 | 0.4945 | 0.3922 | 0.3966 | 0.4891 | 0.4457 |
| 603 | cg17751569 | 0.8014 | 0.8282 | 0.8503 | 0.8250 | 0.8351 | 0.8191 | 0.8127 | 0.8350 | 0.8326 | 0.8274 | 0.8148 | 0.7947 | 0.8047 | 0.8096 |
| 604 | cg17761453 | 0.8375 | 0.8415 | 0.8484 | 0.8262 | 0.8370 | 0.8393 | 0.8435 | 0.8613 | 0.8429 | 0.8218 | 0.8302 | 0.8415 | 0.8438 | 0.8317 |
| 605 | cg17767931 | 0.7808 | 0.7963 | 0.8045 | 0.7771 | 0.8027 | 0.7815 | 0.8204 | 0.7739 | 0.8095 | 0.7970 | 0.7993 | 0.8227 | 0.8170 | 0.7636 |
| 606 | cg17791936 | 0.8207 | 0.8018 | 0.8381 | 0.8258 | 0.7857 | 0.8468 | 0.7876 | 0.8377 | 0.8426 | 0.8241 | 0.8105 | 0.8081 | 0.8139 | 0.8191 |
| 607 | cg17820828 | 0.6348 | 0.6235 | 0.7649 | 0.7989 | 0.7040 | 0.5209 | 0.8762 | 0.5672 | 0.7195 | 0.5987 | 0.5499 | 0.5890 | 0.6662 | 0.5997 |
| 608 | cg17829936 | 0.8883 | 0.9080 | 0.7908 | 0.9022 | 0.9145 | 0.6767 | 0.7893 | 0.8347 | 0.7691 | 0.8976 | 0.9098 | 0.9029 | 0.7955 | 0.9086 |
| 609 | cg17901463 | 0.0269 | 0.0525 | 0.3838 | 0.3182 | 0.3826 | 0.3611 | 0.0286 | 0.3816 | 0.3843 | 0.3952 | 0.0540 | 0.3779 | 0.0359 | 0.0371 |
| 610 | cg17925436 | 0.6262 | 0.7935 | 0.7833 | 0.7218 | 0.7823 | 0.7761 | 0.7578 | 0.6696 | 0.7446 | 0.7637 | 0.7529 | 0.7191 | 0.7434 | 0.7219 |
| 611 | cg17947599 | 0.8881 | 0.8999 | 0.8908 | 0.8925 | 0.9018 | 0.8915 | 0.8966 | 0.9015 | 0.8872 | 0.8911 | 0.8966 | 0.8750 | 0.8938 | 0.8387 |
| 612 | cg17977362 | 0.8842 | 0.4886 | 0.4493 | 0.4592 | 0.8838 | 0.8903 | 0.9024 | 0.9019 | 0.8923 | 0.8910 | 0.8941 | 0.8974 | 0.4939 | 0.4555 |
| 613 | cg18003135 | 0.8074 | 0.7595 | 0.8044 | 0.7596 | 0.8022 | 0.7874 | 0.8010 | 0.8038 | 0.7848 | 0.7788 | 0.7537 | 0.7450 | 0.7783 | 0.7423 |

|     |            |        |        |        |        |        |        |        |        |        |        |        |        |        |        |
|-----|------------|--------|--------|--------|--------|--------|--------|--------|--------|--------|--------|--------|--------|--------|--------|
| 614 | cg18087514 | 0.6558 | 0.6938 | 0.6575 | 0.6563 | 0.6927 | 0.6636 | 0.6935 | 0.5912 | 0.6577 | 0.6740 | 0.6718 | 0.7060 | 0.7178 | 0.6270 |
| 615 | cg18117393 | 0.8155 | 0.8391 | 0.8407 | 0.8064 | 0.8213 | 0.8275 | 0.8328 | 0.8392 | 0.8155 | 0.8260 | 0.8147 | 0.8227 | 0.8411 | 0.7569 |
| 616 | cg18128666 | 0.8783 | 0.9001 | 0.9081 | 0.8926 | 0.9043 | 0.8942 | 0.8955 | 0.9141 | 0.9083 | 0.8968 | 0.9061 | 0.9086 | 0.9010 | 0.8828 |
| 617 | cg18156583 | 0.1822 | 0.1588 | 0.1658 | 0.1799 | 0.1875 | 0.1688 | 0.1636 | 0.1980 | 0.1531 | 0.1909 | 0.1660 | 0.1666 | 0.1869 | 0.1861 |
| 618 | cg18184219 | 0.8151 | 0.8408 | 0.8416 | 0.8109 | 0.8246 | 0.7971 | 0.8259 | 0.8254 | 0.8400 | 0.8334 | 0.8228 | 0.8095 | 0.8319 | 0.7709 |
| 619 | cg18236721 | 0.7022 | 0.7597 | 0.7464 | 0.7500 | 0.7291 | 0.7069 | 0.7318 | 0.7408 | 0.7693 | 0.7429 | 0.7504 | 0.7261 | 0.7614 | 0.6756 |
| 620 | cg18254848 | 0.7995 | 0.8331 | 0.8463 | 0.8489 | 0.8447 | 0.8354 | 0.8520 | 0.8660 | 0.8184 | 0.7920 | 0.8355 | 0.8546 | 0.8518 | 0.8327 |
| 621 | cg18328334 | 0.7051 | 0.7659 | 0.6047 | 0.6810 | 0.5801 | 0.5685 | 0.6591 | 0.6419 | 0.6918 | 0.7133 | 0.6523 | 0.6742 | 0.7368 | 0.6914 |
| 622 | cg18344063 | 0.7773 | 0.7850 | 0.8038 | 0.7969 | 0.8183 | 0.8005 | 0.8007 | 0.8002 | 0.7899 | 0.7876 | 0.7794 | 0.8049 | 0.7610 | 0.7849 |
| 623 | cg18364088 | 0.7728 | 0.7954 | 0.8053 | 0.7890 | 0.7948 | 0.7897 | 0.8041 | 0.7885 | 0.8126 | 0.7817 | 0.8027 | 0.7891 | 0.8043 | 0.7555 |
| 624 | cg18370979 | 0.7893 | 0.8540 | 0.8453 | 0.8049 | 0.8451 | 0.8059 | 0.8359 | 0.8245 | 0.8323 | 0.8605 | 0.8441 | 0.8320 | 0.8262 | 0.7908 |
| 625 | cg18397653 | 0.7790 | 0.7956 | 0.8128 | 0.7572 | 0.7843 | 0.7665 | 0.7988 | 0.7968 | 0.7950 | 0.7795 | 0.7945 | 0.7810 | 0.7673 | 0.7578 |
| 626 | cg18412984 | 0.8133 | 0.8267 | 0.8729 | 0.8309 | 0.8306 | 0.8594 | 0.8397 | 0.8487 | 0.8582 | 0.8432 | 0.8454 | 0.8268 | 0.8500 | 0.7874 |
| 627 | cg18437633 | 0.8285 | 0.8467 | 0.8821 | 0.8493 | 0.8720 | 0.8700 | 0.8572 | 0.8672 | 0.8357 | 0.8423 | 0.8593 | 0.8350 | 0.8466 | 0.8132 |
| 628 | cg18459342 | 0.3126 | 0.3738 | 0.3853 | 0.3376 | 0.3716 | 0.3332 | 0.3397 | 0.3158 | 0.3494 | 0.3583 | 0.3872 | 0.3499 | 0.3510 | 0.3421 |
| 629 | cg18499731 | 0.7983 | 0.7713 | 0.8156 | 0.7902 | 0.7780 | 0.7817 | 0.7973 | 0.7921 | 0.7958 | 0.7749 | 0.8128 | 0.7523 | 0.8127 | 0.7350 |
| 630 | cg18582689 | 0.6092 | 0.6984 | 0.7067 | 0.6609 | 0.6699 | 0.6633 | 0.6916 | 0.6398 | 0.6942 | 0.6588 | 0.6788 | 0.6807 | 0.6699 | 0.6162 |
| 631 | cg18632631 | 0.7027 | 0.6624 | 0.5356 | 0.6850 | 0.8157 | 0.7252 | 0.6831 | 0.7312 | 0.6158 | 0.6846 | 0.6546 | 0.6849 | 0.6888 | 0.6346 |
| 632 | cg18715868 | 0.1287 | 0.1294 | 0.1008 | 0.1311 | 0.1130 | 0.1076 | 0.1186 | 0.1154 | 0.1375 | 0.1440 | 0.1225 | 0.1541 | 0.1243 | 0.1385 |
| 633 | cg18766912 | 0.1077 | 0.1932 | 0.1244 | 0.1281 | 0.1501 | 0.1095 | 0.1407 | 0.1110 | 0.1838 | 0.1599 | 0.1683 | 0.1603 | 0.1587 | 0.0942 |
| 634 | cg18768283 | 0.7440 | 0.8009 | 0.7752 | 0.7500 | 0.7765 | 0.7508 | 0.7815 | 0.7676 | 0.7867 | 0.7961 | 0.8186 | 0.7557 | 0.7734 | 0.6995 |
| 635 | cg18771300 | 0.3308 | 0.5144 | 0.2000 | 0.5235 | 0.5914 | 0.2670 | 0.2829 | 0.5042 | 0.5810 | 0.5639 | 0.8063 | 0.2907 | 0.8173 | 0.7828 |
| 636 | cg18806365 | 0.3380 | 0.3723 | 0.4584 | 0.4619 | 0.4230 | 0.4224 | 0.3584 | 0.3194 | 0.3906 | 0.3742 | 0.3930 | 0.3679 | 0.3998 | 0.4189 |
| 637 | cg18862260 | 0.7678 | 0.7930 | 0.7997 | 0.8022 | 0.7922 | 0.7780 | 0.7860 | 0.8021 | 0.7773 | 0.7732 | 0.7687 | 0.7627 | 0.7759 | 0.7420 |
| 638 | cg18876189 | 0.8518 | 0.8599 | 0.8755 | 0.8602 | 0.8580 | 0.8618 | 0.8636 | 0.8871 | 0.8638 | 0.8508 | 0.8585 | 0.8527 | 0.8584 | 0.8376 |
| 639 | cg18879041 | 0.7370 | 0.7570 | 0.7665 | 0.7699 | 0.7908 | 0.7672 | 0.7860 | 0.7619 | 0.7178 | 0.7181 | 0.7476 | 0.7527 | 0.7483 | 0.6609 |
| 640 | cg18885346 | 0.8730 | 0.8430 | 0.7284 | 0.7704 | 0.8219 | 0.7836 | 0.8589 | 0.8407 | 0.8556 | 0.8169 | 0.8499 | 0.8558 | 0.8054 | 0.7155 |
| 641 | cg18887228 | 0.8387 | 0.8511 | 0.8733 | 0.8312 | 0.8516 | 0.8573 | 0.8596 | 0.8651 | 0.8749 | 0.8472 | 0.8387 | 0.8309 | 0.8412 | 0.8114 |
| 642 | cg18901940 | 0.8032 | 0.8228 | 0.8469 | 0.7987 | 0.8397 | 0.8375 | 0.8250 | 0.8052 | 0.8284 | 0.8251 | 0.8329 | 0.8131 | 0.8007 | 0.7945 |
| 643 | cg18979762 | 0.8179 | 0.8249 | 0.8494 | 0.8304 | 0.8416 | 0.8511 | 0.8535 | 0.8526 | 0.8389 | 0.8025 | 0.7872 | 0.8033 | 0.7889 | 0.7684 |
| 644 | cg18999668 | 0.8114 | 0.7955 | 0.8154 | 0.8092 | 0.7964 | 0.8125 | 0.8165 | 0.8266 | 0.8194 | 0.8089 | 0.8064 | 0.8148 | 0.7690 | 0.7935 |
| 645 | cg19034028 | 0.6535 | 0.6596 | 0.5978 | 0.6421 | 0.6610 | 0.6856 | 0.5659 | 0.6713 | 0.7034 | 0.6472 | 0.6401 | 0.6785 | 0.7292 | 0.6102 |
| 646 | cg19058765 | 0.8196 | 0.8701 | 0.8651 | 0.8480 | 0.8539 | 0.8567 | 0.8548 | 0.8490 | 0.8550 | 0.8610 | 0.8516 | 0.8486 | 0.8579 | 0.7916 |
| 647 | cg19105504 | 0.7876 | 0.6970 | 0.7769 | 0.7525 | 0.8238 | 0.7684 | 0.7879 | 0.8339 | 0.7433 | 0.7428 | 0.7246 | 0.7061 | 0.7216 | 0.6772 |
| 648 | cg19110684 | 0.1655 | 0.1230 | 0.1146 | 0.1308 | 0.1189 | 0.1170 | 0.1307 | 0.1304 | 0.1370 | 0.1330 | 0.1116 | 0.1031 | 0.1280 | 0.1406 |
| 649 | cg19120125 | 0.8115 | 0.8200 | 0.8605 | 0.7893 | 0.8091 | 0.8106 | 0.8129 | 0.8034 | 0.8173 | 0.8364 | 0.8257 | 0.7989 | 0.8026 | 0.7676 |
| 650 | cg19139729 | 0.8091 | 0.7843 | 0.7973 | 0.8138 | 0.8370 | 0.8035 | 0.7705 | 0.8195 | 0.7750 | 0.7827 | 0.7512 | 0.7582 | 0.7936 | 0.8107 |
| 651 | cg19203504 | 0.2473 | 0.2912 | 0.3241 | 0.2704 | 0.2877 | 0.3052 | 0.3110 | 0.3040 | 0.3459 | 0.3142 | 0.3369 | 0.2937 | 0.3302 | 0.2651 |
| 652 | cg19242268 | 0.5531 | 0.5304 | 0.5054 | 0.5580 | 0.5644 | 0.5288 | 0.6374 | 0.5192 | 0.5925 | 0.4848 | 0.5248 | 0.5538 | 0.5464 | 0.5929 |
| 653 | cg19255783 | 0.1337 | 0.0996 | 0.0707 | 0.0897 | 0.0871 | 0.0730 | 0.0784 | 0.0840 | 0.0802 | 0.0808 | 0.0752 | 0.0823 | 0.0847 | 0.1127 |
| 654 | cg19399100 | 0.7353 | 0.7883 | 0.7967 | 0.7372 | 0.7690 | 0.7953 | 0.7993 | 0.7471 | 0.7672 | 0.7485 | 0.7781 | 0.7927 | 0.8023 | 0.7472 |
| 655 | cg19403023 | 0.6536 | 0.6819 | 0.7552 | 0.6408 | 0.6678 | 0.7780 | 0.8084 | 0.5092 | 0.6145 | 0.7072 | 0.7678 | 0.7393 | 0.6660 | 0.6850 |
| 656 | cg19404190 | 0.8191 | 0.8181 | 0.8321 | 0.8167 | 0.8441 | 0.8281 | 0.8374 | 0.8296 | 0.8077 | 0.8076 | 0.8168 | 0.8230 | 0.8119 | 0.8037 |
| 657 | cg19418958 | 0.6539 | 0.6534 | 0.6525 | 0.6347 | 0.6774 | 0.6576 | 0.7018 | 0.6635 | 0.6736 | 0.6824 | 0.6749 | 0.6896 | 0.6870 | 0.6304 |
| 658 | cg19428735 | 0.6101 | 0.6446 | 0.6998 | 0.6374 | 0.6420 | 0.6421 | 0.6867 | 0.5845 | 0.6725 | 0.6854 | 0.6903 | 0.6519 | 0.6647 | 0.5657 |
| 659 | cg19453250 | 0.5223 | 0.5100 | 0.2958 | 0.4789 | 0.4146 | 0.3776 | 0.4991 | 0.4458 | 0.4387 | 0.3946 | 0.4519 | 0.3981 | 0.4133 | 0.4385 |
| 660 | cg19510180 | 0.7106 | 0.7769 | 0.7767 | 0.6756 | 0.7428 | 0.7479 | 0.7200 | 0.6803 | 0.7259 | 0.7389 | 0.7455 | 0.7421 | 0.7475 | 0.6930 |
| 661 | cg19510604 | 0.8531 | 0.8498 | 0.8574 | 0.8648 | 0.8663 | 0.8547 | 0.8442 | 0.8478 | 0.8688 | 0.8709 | 0.8639 | 0.8566 | 0.8493 | 0.8543 |
| 662 | cg19560210 | 0.8767 | 0.8620 | 0.8811 | 0.8737 | 0.8943 | 0.8859 | 0.8834 | 0.8970 | 0.8938 | 0.8954 | 0.8802 | 0.8885 | 0.8693 | 0.8380 |
| 663 | cg19561186 | 0.6546 | 0.7564 | 0.7517 | 0.7156 | 0.7393 | 0.7420 | 0.7224 | 0.7385 | 0.7666 | 0.7591 | 0.7354 | 0.7411 | 0.7496 | 0.6488 |
| 664 | cg19612574 | 0.8715 | 0.8533 | 0.8704 | 0.8686 | 0.8619 | 0.8783 | 0.8540 | 0.8499 | 0.8693 | 0.8588 | 0.8553 | 0.8731 | 0.8503 | 0.8459 |
| 665 | cg19666391 | 0.7161 | 0.7562 | 0.7585 | 0.7542 | 0.7422 | 0.7428 | 0.7503 | 0.7300 | 0.7534 | 0.7307 | 0.7408 | 0.7550 | 0.7492 | 0.7110 |

|     |            |        |        |        |        |        |        |        |        |        |        |        |        |        |        |
|-----|------------|--------|--------|--------|--------|--------|--------|--------|--------|--------|--------|--------|--------|--------|--------|
| 666 | cg19682367 | 0.7890 | 0.8248 | 0.8123 | 0.7938 | 0.7973 | 0.8297 | 0.8291 | 0.7967 | 0.8337 | 0.8509 | 0.8562 | 0.8464 | 0.8083 | 0.7828 |
| 667 | cg19690404 | 0.6045 | 0.7186 | 0.6906 | 0.6227 | 0.6797 | 0.6729 | 0.6782 | 0.6365 | 0.6962 | 0.6530 | 0.7380 | 0.7115 | 0.7461 | 0.6606 |
| 668 | cg19740969 | 0.7499 | 0.7767 | 0.8294 | 0.7905 | 0.8119 | 0.7990 | 0.8069 | 0.7918 | 0.8051 | 0.7734 | 0.7980 | 0.7748 | 0.7847 | 0.7362 |
| 669 | cg19763281 | 0.8245 | 0.8454 | 0.8574 | 0.8398 | 0.8467 | 0.8475 | 0.8566 | 0.8313 | 0.8431 | 0.8173 | 0.8449 | 0.8335 | 0.8538 | 0.7919 |
| 670 | cg19766460 | 0.1280 | 0.0595 | 0.1119 | 0.0497 | 0.0518 | 0.0525 | 0.0456 | 0.0443 | 0.0561 | 0.0560 | 0.0565 | 0.0555 | 0.0602 | 0.0495 |
| 671 | cg19776090 | 0.4684 | 0.5030 | 0.5268 | 0.4711 | 0.5165 | 0.4782 | 0.4983 | 0.5268 | 0.5027 | 0.5470 | 0.5233 | 0.4946 | 0.4961 | 0.4767 |
| 672 | cg19782598 | 0.8477 | 0.8173 | 0.8662 | 0.8163 | 0.8581 | 0.8368 | 0.8602 | 0.8436 | 0.8441 | 0.8152 | 0.8440 | 0.8298 | 0.8352 | 0.8235 |
| 673 | cg19831575 | 0.0711 | 0.0551 | 0.0710 | 0.0408 | 0.0541 | 0.0561 | 0.0407 | 0.0429 | 0.0423 | 0.0622 | 0.0653 | 0.0589 | 0.0584 | 0.0441 |
| 674 | cg19884600 | 0.8197 | 0.8305 | 0.8387 | 0.8016 | 0.8410 | 0.8219 | 0.8548 | 0.8133 | 0.8518 | 0.7991 | 0.8290 | 0.8398 | 0.8334 | 0.7707 |
| 675 | cg19972859 | 0.0465 | 0.0590 | 0.0469 | 0.0452 | 0.0437 | 0.0457 | 0.0414 | 0.0509 | 0.0572 | 0.0559 | 0.0611 | 0.0565 | 0.0607 | 0.0457 |
| 676 | cg19984039 | 0.6502 | 0.6097 | 0.6930 | 0.6447 | 0.7006 | 0.6462 | 0.6985 | 0.6275 | 0.6543 | 0.6438 | 0.6344 | 0.5563 | 0.6636 | 0.5876 |
| 677 | cg20015689 | 0.6270 | 0.6450 | 0.6614 | 0.6404 | 0.6818 | 0.6557 | 0.6468 | 0.5823 | 0.6422 | 0.6474 | 0.6926 | 0.6584 | 0.6701 | 0.6183 |
| 678 | cg20025970 | 0.6700 | 0.7108 | 0.7086 | 0.6899 | 0.6851 | 0.6659 | 0.6801 | 0.6823 | 0.7263 | 0.6940 | 0.7345 | 0.7429 | 0.7079 | 0.6657 |
| 679 | cg20103550 | 0.6933 | 0.7392 | 0.7369 | 0.6669 | 0.7252 | 0.7157 | 0.6862 | 0.7198 | 0.7195 | 0.7327 | 0.7300 | 0.7510 | 0.6866 | 0.6459 |
| 680 | cg20118424 | 0.8919 | 0.8917 | 0.9003 | 0.8921 | 0.8975 | 0.8863 | 0.8837 | 0.8848 | 0.9086 | 0.8881 | 0.8901 | 0.8876 | 0.8863 | 0.8176 |
| 681 | cg20226593 | 0.7390 | 0.7222 | 0.7750 | 0.7150 | 0.7913 | 0.7589 | 0.7609 | 0.7448 | 0.7392 | 0.7330 | 0.6913 | 0.7295 | 0.7282 | 0.6555 |
| 682 | cg20234959 | 0.7865 | 0.7830 | 0.8085 | 0.7901 | 0.8101 | 0.8257 | 0.7938 | 0.7760 | 0.8063 | 0.8005 | 0.8031 | 0.7861 | 0.7971 | 0.7192 |
| 683 | cg20286200 | 0.1282 | 0.2241 | 0.1172 | 0.1363 | 0.1454 | 0.1357 | 0.1369 | 0.1461 | 0.1965 | 0.2494 | 0.2898 | 0.2350 | 0.2229 | 0.2136 |
| 684 | cg20427865 | 0.8331 | 0.8330 | 0.8272 | 0.8289 | 0.8575 | 0.8139 | 0.8378 | 0.8592 | 0.8106 | 0.8108 | 0.8576 | 0.8425 | 0.8376 | 0.8480 |
| 685 | cg20439022 | 0.0940 | 0.2351 | 0.0341 | 0.0312 | 0.1169 | 0.0410 | 0.0323 | 0.0816 | 0.2554 | 0.0576 | 0.0601 | 0.0552 | 0.0997 | 0.0359 |
| 686 | cg20449692 | 0.0970 | 0.1115 | 0.0473 | 0.0930 | 0.0864 | 0.0775 | 0.1251 | 0.0705 | 0.0919 | 0.1024 | 0.1211 | 0.1185 | 0.0891 | 0.0562 |
| 687 | cg20466180 | 0.1194 | 0.1278 | 0.0952 | 0.1147 | 0.1297 | 0.1088 | 0.0966 | 0.1134 | 0.1039 | 0.1319 | 0.1312 | 0.1571 | 0.1207 | 0.1444 |
| 688 | cg20507276 | 0.0515 | 0.5602 | 0.1294 | 0.0339 | 0.6774 | 0.5504 | 0.0418 | 0.4670 | 0.1378 | 0.5590 | 0.3002 | 0.4439 | 0.1053 | 0.4885 |
| 689 | cg20514617 | 0.6207 | 0.6149 | 0.5903 | 0.6642 | 0.6268 | 0.6537 | 0.7041 | 0.5985 | 0.6550 | 0.5456 | 0.5815 | 0.6264 | 0.6591 | 0.5947 |
| 690 | cg20540428 | 0.5348 | 0.4184 | 0.5311 | 0.7520 | 0.7580 | 0.5353 | 0.5322 | 0.5481 | 0.5249 | 0.5217 | 0.3299 | 0.6201 | 0.5460 | 0.3036 |
| 691 | cg20542190 | 0.6081 | 0.5519 | 0.4415 | 0.3790 | 0.5122 | 0.5072 | 0.5607 | 0.5956 | 0.5228 | 0.4401 | 0.5597 | 0.5632 | 0.5331 | 0.4475 |
| 692 | cg20630386 | 0.6280 | 0.6470 | 0.6815 | 0.6206 | 0.6242 | 0.6585 | 0.6600 | 0.6427 | 0.7027 | 0.6565 | 0.6720 | 0.6231 | 0.6706 | 0.6538 |
| 693 | cg20643416 | 0.0369 | 0.0480 | 0.0370 | 0.0322 | 0.0360 | 0.0365 | 0.0382 | 0.0412 | 0.0406 | 0.0518 | 0.0500 | 0.0473 | 0.0474 | 0.0437 |
| 694 | cg20773127 | 0.6543 | 0.5779 | 0.6296 | 0.6063 | 0.6957 | 0.6266 | 0.7018 | 0.6594 | 0.6892 | 0.5885 | 0.5988 | 0.6400 | 0.6844 | 0.6545 |
| 695 | cg20857253 | 0.4457 | 0.3986 | 0.2675 | 0.4192 | 0.5500 | 0.5414 | 0.4552 | 0.4333 | 0.4994 | 0.5554 | 0.4875 | 0.3790 | 0.3739 | 0.3170 |
| 696 | cg20887241 | 0.7555 | 0.8059 | 0.7932 | 0.8094 | 0.8065 | 0.8330 | 0.8332 | 0.8404 | 0.8062 | 0.7980 | 0.8139 | 0.7468 | 0.7828 | 0.8174 |
| 697 | cg20906802 | 0.7701 | 0.7948 | 0.8118 | 0.7908 | 0.8052 | 0.7792 | 0.7991 | 0.8155 | 0.8249 | 0.8207 | 0.7955 | 0.7776 | 0.7930 | 0.7251 |
| 698 | cg20924286 | 0.4308 | 0.4281 | 0.4386 | 0.4368 | 0.4891 | 0.4590 | 0.4576 | 0.4361 | 0.3769 | 0.5200 | 0.4671 | 0.4761 | 0.4392 | 0.4404 |
| 699 | cg20939319 | 0.6376 | 0.6813 | 0.6637 | 0.6734 | 0.7105 | 0.6659 | 0.6902 | 0.7070 | 0.6946 | 0.6910 | 0.6845 | 0.7350 | 0.7119 | 0.6647 |
| 700 | cg20945531 | 0.4330 | 0.8930 | 0.8813 | 0.8874 | 0.8874 | 0.9024 | 0.8887 | 0.9053 | 0.8954 | 0.8795 | 0.8941 | 0.8816 | 0.8963 | 0.8563 |
| 701 | cg20951539 | 0.7815 | 0.7974 | 0.7852 | 0.7767 | 0.7632 | 0.7768 | 0.7984 | 0.7989 | 0.8113 | 0.7853 | 0.7884 | 0.7816 | 0.8177 | 0.7731 |
| 702 | cg20980592 | 0.9200 | 0.9381 | 0.9487 | 0.9361 | 0.9290 | 0.9428 | 0.9318 | 0.9200 | 0.9254 | 0.9324 | 0.9235 | 0.9158 | 0.9348 | 0.9257 |
| 703 | cg20988616 | 0.8420 | 0.8518 | 0.8573 | 0.8305 | 0.8493 | 0.8506 | 0.8483 | 0.8645 | 0.8457 | 0.8517 | 0.8538 | 0.8352 | 0.8306 | 0.8278 |
| 704 | cg21010262 | 0.0441 | 0.0494 | 0.0461 | 0.0442 | 0.0494 | 0.0415 | 0.0470 | 0.0472 | 0.0587 | 0.0619 | 0.0641 | 0.0540 | 0.0602 | 0.0512 |
| 705 | cg21021629 | 0.7962 | 0.7945 | 0.8367 | 0.8048 | 0.8251 | 0.8153 | 0.8112 | 0.8167 | 0.8111 | 0.8071 | 0.7952 | 0.8081 | 0.8247 | 0.7168 |
| 706 | cg21022395 | 0.7388 | 0.8075 | 0.7996 | 0.7346 | 0.7934 | 0.7661 | 0.8010 | 0.7912 | 0.8029 | 0.7635 | 0.8118 | 0.8224 | 0.8124 | 0.8004 |
| 707 | cg21023114 | 0.8478 | 0.8730 | 0.8846 | 0.8788 | 0.8780 | 0.8663 | 0.8755 | 0.8725 | 0.8696 | 0.8577 | 0.8637 | 0.8610 | 0.8692 | 0.8517 |
| 708 | cg21039679 | 0.7536 | 0.8035 | 0.7869 | 0.7903 | 0.8333 | 0.7942 | 0.8276 | 0.7786 | 0.8320 | 0.8410 | 0.8230 | 0.8180 | 0.7973 | 0.8051 |
| 709 | cg21041127 | 0.6941 | 0.7345 | 0.7441 | 0.7224 | 0.7053 | 0.6781 | 0.7331 | 0.6753 | 0.7652 | 0.7298 | 0.7167 | 0.7261 | 0.7184 | 0.6848 |
| 710 | cg21084260 | 0.7895 | 0.8059 | 0.7986 | 0.8077 | 0.8005 | 0.8121 | 0.7837 | 0.7871 | 0.8237 | 0.8431 | 0.8371 | 0.8269 | 0.8193 | 0.7844 |
| 711 | cg21105318 | 0.8140 | 0.8408 | 0.8425 | 0.7851 | 0.8373 | 0.8450 | 0.8259 | 0.8111 | 0.8027 | 0.8022 | 0.8153 | 0.7816 | 0.8597 | 0.7714 |
| 712 | cg21142398 | 0.8624 | 0.8641 | 0.9021 | 0.8371 | 0.8783 | 0.8829 | 0.8797 | 0.8712 | 0.8812 | 0.8567 | 0.8768 | 0.8557 | 0.8596 | 0.8236 |
| 713 | cg21168622 | 0.2513 | 0.1955 | 0.1904 | 0.2091 | 0.1741 | 0.2088 | 0.1873 | 0.1658 | 0.2016 | 0.2150 | 0.2034 | 0.2368 | 0.1970 | 0.2335 |
| 714 | cg21169285 | 0.8319 | 0.8671 | 0.8531 | 0.8489 | 0.8496 | 0.8620 | 0.8597 | 0.8475 | 0.8496 | 0.8579 | 0.8600 | 0.8375 | 0.8774 | 0.8108 |
| 715 | cg21194776 | 0.7970 | 0.8306 | 0.7683 | 0.8104 | 0.8365 | 0.8250 | 0.8233 | 0.8336 | 0.8416 | 0.8452 | 0.8409 | 0.8299 | 0.8341 | 0.7805 |
| 716 | cg21201572 | 0.7859 | 0.7859 | 0.7981 | 0.8060 | 0.8135 | 0.8129 | 0.8296 | 0.8091 | 0.8128 | 0.7788 | 0.8078 | 0.8180 | 0.8072 | 0.7906 |
| 717 | cg21270015 | 0.8325 | 0.8994 | 0.8876 | 0.8388 | 0.8720 | 0.8635 | 0.8792 | 0.8498 | 0.8796 | 0.8757 | 0.8746 | 0.8625 | 0.8785 | 0.8195 |



|     |            |        |        |        |        |        |        |        |        |        |        |        |        |        |        |
|-----|------------|--------|--------|--------|--------|--------|--------|--------|--------|--------|--------|--------|--------|--------|--------|
| 718 | cg21405195 | 0.8586 | 0.8548 | 0.8705 | 0.8354 | 0.8508 | 0.8579 | 0.8647 | 0.8751 | 0.8578 | 0.8436 | 0.8577 | 0.8644 | 0.8574 | 0.8540 |
| 719 | cg21409833 | 0.7851 | 0.8199 | 0.8389 | 0.7934 | 0.8168 | 0.8195 | 0.8358 | 0.8310 | 0.8231 | 0.8285 | 0.8155 | 0.8050 | 0.7991 | 0.7782 |
| 720 | cg21431536 | 0.7689 | 0.7880 | 0.8072 | 0.7744 | 0.7872 | 0.7598 | 0.7888 | 0.7647 | 0.7750 | 0.7644 | 0.8180 | 0.7625 | 0.7925 | 0.7599 |
| 721 | cg21450627 | 0.8300 | 0.4977 | 0.7933 | 0.8211 | 0.8318 | 0.8244 | 0.8162 | 0.7846 | 0.8058 | 0.8064 | 0.8029 | 0.8200 | 0.7962 | 0.5134 |
| 722 | cg21457147 | 0.8431 | 0.8647 | 0.8790 | 0.8618 | 0.8663 | 0.8687 | 0.8631 | 0.8740 | 0.8671 | 0.8779 | 0.8582 | 0.8673 | 0.8722 | 0.8372 |
| 723 | cg21474838 | 0.7511 | 0.7804 | 0.7685 | 0.7466 | 0.7800 | 0.7896 | 0.7834 | 0.7315 | 0.7569 | 0.7318 | 0.7718 | 0.7946 | 0.7676 | 0.7630 |
| 724 | cg21621204 | 0.7602 | 0.7639 | 0.7933 | 0.7556 | 0.7903 | 0.7914 | 0.7555 | 0.7890 | 0.7836 | 0.7635 | 0.7427 | 0.7591 | 0.7617 | 0.7378 |
| 725 | cg21631409 | 0.6648 | 0.7141 | 0.7393 | 0.6964 | 0.7178 | 0.7281 | 0.7350 | 0.7418 | 0.7056 | 0.6390 | 0.7046 | 0.7032 | 0.7040 | 0.6631 |
| 726 | cg21642649 | 0.0698 | 0.0955 | 0.0509 | 0.0555 | 0.1596 | 0.0942 | 0.0601 | 0.2141 | 0.3113 | 0.0868 | 0.0922 | 0.1385 | 0.0796 | 0.0777 |
| 727 | cg21643191 | 0.8104 | 0.8072 | 0.8562 | 0.8220 | 0.8289 | 0.8090 | 0.8377 | 0.8311 | 0.8415 | 0.8501 | 0.8213 | 0.8191 | 0.8325 | 0.8007 |
| 728 | cg21649520 | 0.7530 | 0.7921 | 0.7931 | 0.7804 | 0.7885 | 0.7976 | 0.8007 | 0.7700 | 0.7840 | 0.7376 | 0.7702 | 0.7804 | 0.7680 | 0.7518 |
| 729 | cg21660727 | 0.0822 | 0.0974 | 0.0770 | 0.0967 | 0.0753 | 0.0814 | 0.0810 | 0.0787 | 0.1050 | 0.1007 | 0.0909 | 0.0981 | 0.0853 | 0.0878 |
| 730 | cg21717724 | 0.6946 | 0.6140 | 0.8580 | 0.5833 | 0.6275 | 0.2869 | 0.8748 | 0.8694 | 0.8557 | 0.6467 | 0.8590 | 0.7042 | 0.8854 | 0.6046 |
| 731 | cg21727574 | 0.8562 | 0.8628 | 0.8670 | 0.8381 | 0.8746 | 0.8864 | 0.8746 | 0.8744 | 0.8805 | 0.9022 | 0.8750 | 0.8622 | 0.8570 | 0.8231 |
| 732 | cg21736205 | 0.8532 | 0.8671 | 0.8963 | 0.8694 | 0.8994 | 0.8761 | 0.8855 | 0.8704 | 0.8826 | 0.8842 | 0.8801 | 0.8743 | 0.8816 | 0.8467 |
| 733 | cg21743649 | 0.9159 | 0.9179 | 0.9229 | 0.9301 | 0.9205 | 0.9246 | 0.9203 | 0.9109 | 0.9181 | 0.9122 | 0.9150 | 0.9064 | 0.9131 | 0.9276 |
| 734 | cg21750887 | 0.6701 | 0.6112 | 0.5535 | 0.6030 | 0.5931 | 0.6298 | 0.6381 | 0.5126 | 0.5443 | 0.6345 | 0.5843 | 0.5529 | 0.6939 | 0.5827 |
| 735 | cg21804950 | 0.4274 | 0.2719 | 0.3555 | 0.4290 | 0.3553 | 0.2969 | 0.3089 | 0.4097 | 0.3874 | 0.3090 | 0.3235 | 0.4631 | 0.3527 | 0.3286 |
| 736 | cg21929875 | 0.8818 | 0.8526 | 0.9020 | 0.9094 | 0.9204 | 0.8792 | 0.9406 | 0.9146 | 0.9069 | 0.8455 | 0.8914 | 0.8990 | 0.8390 | 0.9383 |
| 737 | cg22024657 | 0.8567 | 0.8561 | 0.8865 | 0.8583 | 0.8693 | 0.8631 | 0.8677 | 0.8535 | 0.8581 | 0.8484 | 0.8550 | 0.8583 | 0.8606 | 0.8322 |
| 738 | cg22051636 | 0.6113 | 0.4945 | 0.5430 | 0.4975 | 0.6234 | 0.6377 | 0.3369 | 0.6548 | 0.2376 | 0.6047 | 0.6932 | 0.6870 | 0.4836 | 0.4902 |
| 739 | cg22064451 | 0.6837 | 0.6840 | 0.6816 | 0.7180 | 0.7283 | 0.7107 | 0.7285 | 0.6823 | 0.6836 | 0.6993 | 0.6786 | 0.6943 | 0.6829 | 0.6115 |
| 740 | cg22066521 | 0.7277 | 0.7532 | 0.7903 | 0.7365 | 0.7802 | 0.7780 | 0.7700 | 0.7543 | 0.7518 | 0.7566 | 0.7430 | 0.7535 | 0.7661 | 0.7107 |
| 741 | cg22074858 | 0.1134 | 0.1091 | 0.0777 | 0.0934 | 0.0890 | 0.0851 | 0.0862 | 0.0785 | 0.1078 | 0.1093 | 0.1045 | 0.1078 | 0.1234 | 0.1255 |
| 742 | cg22152192 | 0.8111 | 0.8268 | 0.8492 | 0.7766 | 0.8638 | 0.8109 | 0.8232 | 0.8398 | 0.8338 | 0.8229 | 0.8262 | 0.8315 | 0.8226 | 0.7682 |
| 743 | cg22228134 | 0.8735 | 0.8618 | 0.8583 | 0.8506 | 0.8725 | 0.8511 | 0.8539 | 0.8266 | 0.8863 | 0.8431 | 0.8467 | 0.8662 | 0.8763 | 0.8687 |
| 744 | cg22324153 | 0.7428 | 0.8307 | 0.8414 | 0.8207 | 0.8215 | 0.8298 | 0.8424 | 0.8177 | 0.8335 | 0.8205 | 0.8265 | 0.8126 | 0.8314 | 0.7452 |
| 745 | cg22367970 | 0.1430 | 0.1680 | 0.1129 | 0.1541 | 0.1256 | 0.1127 | 0.1208 | 0.1470 | 0.1723 | 0.1548 | 0.1653 | 0.1498 | 0.1464 | 0.1956 |
| 746 | cg22373097 | 0.8128 | 0.6356 | 0.8445 | 0.8131 | 0.8278 | 0.1442 | 0.8270 | 0.8472 | 0.8397 | 0.8246 | 0.6526 | 0.6544 | 0.8302 | 0.8065 |
| 747 | cg22392708 | 0.3614 | 0.3437 | 0.3167 | 0.3586 | 0.3603 | 0.3447 | 0.3796 | 0.3621 | 0.3687 | 0.3106 | 0.3495 | 0.3787 | 0.3531 | 0.3669 |
| 748 | cg22419732 | 0.8031 | 0.7726 | 0.8215 | 0.7586 | 0.8168 | 0.7982 | 0.7844 | 0.8294 | 0.7850 | 0.7661 | 0.8145 | 0.7862 | 0.8061 | 0.7437 |
| 749 | cg22427279 | 0.6007 | 0.5962 | 0.6478 | 0.5909 | 0.6406 | 0.6514 | 0.6189 | 0.6070 | 0.5965 | 0.6041 | 0.6107 | 0.6008 | 0.6124 | 0.5461 |
| 750 | cg22432908 | 0.7963 | 0.8049 | 0.8178 | 0.7168 | 0.8095 | 0.8043 | 0.8072 | 0.8258 | 0.8277 | 0.7144 | 0.7151 | 0.7787 | 0.7891 | 0.7760 |
| 751 | cg22487322 | 0.9312 | 0.9335 | 0.9345 | 0.9255 | 0.9378 | 0.9330 | 0.9278 | 0.9140 | 0.9371 | 0.9319 | 0.9198 | 0.9361 | 0.9347 | 0.9047 |
| 752 | cg22506453 | 0.8238 | 0.8494 | 0.8615 | 0.8489 | 0.8514 | 0.8344 | 0.8493 | 0.8135 | 0.8683 | 0.8674 | 0.8221 | 0.8450 | 0.8339 | 0.8028 |
| 753 | cg22568695 | 0.7871 | 0.8267 | 0.8211 | 0.7777 | 0.7982 | 0.8157 | 0.8222 | 0.8148 | 0.8302 | 0.8066 | 0.8213 | 0.7987 | 0.8080 | 0.7679 |
| 754 | cg22586527 | 0.6586 | 0.6933 | 0.6791 | 0.6456 | 0.6314 | 0.6292 | 0.6524 | 0.6067 | 0.6749 | 0.6932 | 0.7012 | 0.6841 | 0.7146 | 0.6155 |
| 755 | cg22598744 | 0.8781 | 0.9019 | 0.9031 | 0.8842 | 0.8941 | 0.8966 | 0.8983 | 0.8836 | 0.8863 | 0.9084 | 0.8996 | 0.9038 | 0.9103 | 0.8695 |
| 756 | cg22628694 | 0.8504 | 0.8822 | 0.8894 | 0.8881 | 0.8909 | 0.9002 | 0.9022 | 0.8972 | 0.8907 | 0.8820 | 0.8762 | 0.8822 | 0.8721 | 0.8351 |
| 757 | cg22679120 | 0.6054 | 0.6847 | 0.6567 | 0.6664 | 0.6582 | 0.6487 | 0.6713 | 0.6807 | 0.6659 | 0.6336 | 0.6819 | 0.6566 | 0.6786 | 0.6908 |
| 758 | cg22699362 | 0.7697 | 0.8339 | 0.8138 | 0.7830 | 0.8139 | 0.8160 | 0.8067 | 0.7907 | 0.8086 | 0.8076 | 0.8236 | 0.8074 | 0.7997 | 0.7589 |
| 759 | cg22726338 | 0.7228 | 0.7611 | 0.7684 | 0.6907 | 0.7412 | 0.7666 | 0.7530 | 0.7200 | 0.6790 | 0.7533 | 0.7775 | 0.6964 | 0.7568 | 0.6641 |
| 760 | cg22730560 | 0.4953 | 0.4921 | 0.4659 | 0.4805 | 0.5100 | 0.4611 | 0.4982 | 0.4883 | 0.5091 | 0.4737 | 0.5230 | 0.5022 | 0.4880 | 0.4829 |
| 761 | cg22730830 | 0.7168 | 0.7716 | 0.7344 | 0.6673 | 0.8243 | 0.6592 | 0.8496 | 0.7862 | 0.6634 | 0.7306 | 0.6708 | 0.6232 | 0.7338 | 0.8529 |
| 762 | cg22778145 | 0.4221 | 0.3704 | 0.3554 | 0.4118 | 0.3173 | 0.3654 | 0.4106 | 0.3922 | 0.5249 | 0.4063 | 0.4315 | 0.4402 | 0.4669 | 0.4168 |
| 763 | cg22783258 | 0.8247 | 0.8181 | 0.8639 | 0.8455 | 0.8625 | 0.8369 | 0.8318 | 0.8666 | 0.8000 | 0.8273 | 0.8400 | 0.8306 | 0.8179 | 0.8070 |
| 764 | cg22833175 | 0.8012 | 0.8096 | 0.7897 | 0.7925 | 0.7846 | 0.7866 | 0.7900 | 0.8009 | 0.7728 | 0.7723 | 0.7780 | 0.7769 | 0.7911 | 0.7505 |
| 765 | cg22836132 | 0.7951 | 0.8079 | 0.8171 | 0.7959 | 0.8312 | 0.8030 | 0.8026 | 0.8073 | 0.8043 | 0.7796 | 0.7845 | 0.8110 | 0.7812 | 0.7537 |
| 766 | cg22940988 | 0.7575 | 0.7902 | 0.7964 | 0.7643 | 0.7880 | 0.7726 | 0.7572 | 0.7672 | 0.7889 | 0.7631 | 0.7840 | 0.7789 | 0.7632 | 0.7112 |
| 767 | cg23001457 | 0.7071 | 0.7083 | 0.6593 | 0.6993 | 0.7022 | 0.6975 | 0.6241 | 0.7019 | 0.6348 | 0.6947 | 0.7075 | 0.7324 | 0.7213 | 0.6645 |
| 768 | cg23126947 | 0.7924 | 0.8205 | 0.8399 | 0.8042 | 0.8096 | 0.8223 | 0.8328 | 0.8204 | 0.7974 | 0.8243 | 0.8186 | 0.8165 | 0.8322 | 0.7835 |
| 769 | cg23154064 | 0.7616 | 0.7261 | 0.7623 | 0.7611 | 0.8113 | 0.7927 | 0.8109 | 0.8126 | 0.7268 | 0.7343 | 0.7424 | 0.7544 | 0.7453 | 0.7384 |

|     |            |        |        |        |        |        |        |        |        |        |        |        |        |        |        |
|-----|------------|--------|--------|--------|--------|--------|--------|--------|--------|--------|--------|--------|--------|--------|--------|
| 770 | cg23163573 | 0.6606 | 0.6481 | 0.4806 | 0.6447 | 0.6866 | 0.6130 | 0.6964 | 0.7057 | 0.6543 | 0.5589 | 0.7050 | 0.6782 | 0.6476 | 0.6725 |
| 771 | cg23183296 | 0.7579 | 0.7760 | 0.7902 | 0.6665 | 0.7762 | 0.7904 | 0.7693 | 0.7647 | 0.7744 | 0.7607 | 0.7809 | 0.7481 | 0.7768 | 0.7576 |
| 772 | cg23196557 | 0.6440 | 0.6435 | 0.7378 | 0.6539 | 0.6961 | 0.6938 | 0.7067 | 0.6923 | 0.6864 | 0.7120 | 0.6665 | 0.7000 | 0.7094 | 0.6293 |
| 773 | cg23205183 | 0.7554 | 0.7563 | 0.8243 | 0.7853 | 0.7676 | 0.8023 | 0.7969 | 0.7273 | 0.7418 | 0.7426 | 0.7581 | 0.7082 | 0.7640 | 0.6481 |
| 774 | cg23254045 | 0.7417 | 0.7724 | 0.7842 | 0.7650 | 0.7680 | 0.7707 | 0.7324 | 0.7780 | 0.7910 | 0.7153 | 0.7586 | 0.7576 | 0.7297 | 0.6636 |
| 775 | cg23256150 | 0.8137 | 0.7826 | 0.8087 | 0.7774 | 0.8350 | 0.8001 | 0.7954 | 0.8562 | 0.8155 | 0.7973 | 0.7798 | 0.8107 | 0.8291 | 0.7511 |
| 776 | cg23264413 | 0.7983 | 0.6396 | 0.7045 | 0.5600 | 0.7883 | 0.5838 | 0.4009 | 0.8161 | 0.7443 | 0.7907 | 0.7578 | 0.7412 | 0.7377 | 0.7728 |
| 777 | cg23322523 | 0.7276 | 0.7880 | 0.7458 | 0.7568 | 0.7584 | 0.7577 | 0.8108 | 0.7695 | 0.7727 | 0.7661 | 0.7563 | 0.7408 | 0.7954 | 0.7466 |
| 778 | cg23328124 | 0.8102 | 0.8220 | 0.8343 | 0.8009 | 0.8162 | 0.8211 | 0.8123 | 0.8203 | 0.8326 | 0.8240 | 0.8198 | 0.8189 | 0.8454 | 0.7728 |
| 779 | cg23523368 | 0.8367 | 0.8444 | 0.8529 | 0.8540 | 0.8651 | 0.8395 | 0.8502 | 0.8666 | 0.8640 | 0.8379 | 0.8392 | 0.8638 | 0.8585 | 0.8096 |
| 780 | cg23540745 | 0.8680 | 0.8263 | 0.9013 | 0.8816 | 0.8927 | 0.8735 | 0.8921 | 0.8972 | 0.8326 | 0.8191 | 0.8358 | 0.8268 | 0.8604 | 0.8464 |
| 781 | cg23588759 | 0.7996 | 0.7951 | 0.8391 | 0.8009 | 0.7996 | 0.8055 | 0.7999 | 0.8150 | 0.8144 | 0.7914 | 0.7904 | 0.7792 | 0.8044 | 0.7703 |
| 782 | cg23679141 | 0.2524 | 0.2874 | 0.3152 | 0.2991 | 0.2634 | 0.2482 | 0.2280 | 0.2930 | 0.2710 | 0.2846 | 0.2740 | 0.2462 | 0.2726 | 0.2505 |
| 783 | cg23683201 | 0.8241 | 0.8320 | 0.8601 | 0.8476 | 0.8571 | 0.8440 | 0.8617 | 0.8718 | 0.8469 | 0.8322 | 0.8414 | 0.8396 | 0.8505 | 0.8186 |
| 784 | cg23719367 | 0.8099 | 0.8347 | 0.8686 | 0.8309 | 0.8290 | 0.8463 | 0.8580 | 0.8489 | 0.8380 | 0.8545 | 0.8228 | 0.8352 | 0.8519 | 0.8007 |
| 785 | cg23855121 | 0.7505 | 0.7871 | 0.8071 | 0.7896 | 0.7815 | 0.7841 | 0.8052 | 0.7924 | 0.7813 | 0.7770 | 0.7794 | 0.7898 | 0.7682 | 0.8015 |
| 786 | cg23855818 | 0.7331 | 0.7827 | 0.7747 | 0.7516 | 0.7502 | 0.7487 | 0.7660 | 0.7497 | 0.7699 | 0.7382 | 0.7413 | 0.7357 | 0.7741 | 0.7267 |
| 787 | cg23873703 | 0.8277 | 0.7192 | 0.7462 | 0.7710 | 0.8370 | 0.7763 | 0.8178 | 0.7976 | 0.7934 | 0.7537 | 0.6596 | 0.7307 | 0.7622 | 0.7875 |
| 788 | cg23887102 | 0.8276 | 0.8321 | 0.8685 | 0.8512 | 0.8511 | 0.8459 | 0.8473 | 0.8483 | 0.8468 | 0.8105 | 0.8353 | 0.8376 | 0.8602 | 0.8079 |
| 789 | cg23953831 | 0.0834 | 0.0723 | 0.0820 | 0.0707 | 0.0786 | 0.0546 | 0.2757 | 0.0728 | 0.0726 | 0.0800 | 0.0868 | 0.0843 | 0.0709 | 0.1001 |
| 790 | cg24076830 | 0.8150 | 0.8480 | 0.8563 | 0.8499 | 0.8507 | 0.8562 | 0.8641 | 0.8805 | 0.8683 | 0.8208 | 0.8309 | 0.8405 | 0.8315 | 0.8081 |
| 791 | cg24116886 | 0.8595 | 0.8643 | 0.8834 | 0.8762 | 0.8923 | 0.8831 | 0.8759 | 0.8720 | 0.8706 | 0.8523 | 0.8554 | 0.8552 | 0.8462 | 0.8499 |
| 792 | cg24167928 | 0.8515 | 0.8674 | 0.8969 | 0.8703 | 0.8818 | 0.8890 | 0.8813 | 0.8883 | 0.8857 | 0.8888 | 0.8728 | 0.8704 | 0.8796 | 0.8427 |
| 793 | cg24202119 | 0.7041 | 0.6528 | 0.5972 | 0.6428 | 0.6994 | 0.6513 | 0.6056 | 0.6559 | 0.7031 | 0.6609 | 0.6212 | 0.6434 | 0.5794 | 0.6693 |
| 794 | cg24210717 | 0.7737 | 0.7271 | 0.7094 | 0.7537 | 0.7593 | 0.7358 | 0.7513 | 0.7279 | 0.7276 | 0.7286 | 0.7320 | 0.6525 | 0.7396 | 0.7518 |
| 795 | cg24243265 | 0.8171 | 0.8502 | 0.8705 | 0.8543 | 0.8634 | 0.8591 | 0.8591 | 0.8735 | 0.8679 | 0.8345 | 0.8522 | 0.8577 | 0.8281 | 0.8189 |
| 796 | cg24249775 | 0.8319 | 0.8468 | 0.8790 | 0.8461 | 0.8574 | 0.8577 | 0.8528 | 0.8347 | 0.8631 | 0.8709 | 0.8613 | 0.8620 | 0.8619 | 0.8079 |
| 797 | cg24333473 | 0.4585 | 0.4661 | 0.4018 | 0.3710 | 0.3879 | 0.4378 | 0.3649 | 0.4298 | 0.5089 | 0.4924 | 0.4443 | 0.4737 | 0.4714 | 0.4394 |
| 798 | cg24414383 | 0.7849 | 0.8148 | 0.8285 | 0.8062 | 0.7710 | 0.7989 | 0.8106 | 0.7991 | 0.8137 | 0.7992 | 0.8085 | 0.7987 | 0.8085 | 0.7637 |
| 799 | cg24426405 | 0.7166 | 0.7588 | 0.7500 | 0.7814 | 0.7482 | 0.7358 | 0.7419 | 0.7458 | 0.7567 | 0.7555 | 0.7495 | 0.7336 | 0.7772 | 0.7434 |
| 800 | cg24427660 | 0.5639 | 0.5259 | 0.5414 | 0.5963 | 0.5887 | 0.4849 | 0.5326 | 0.5861 | 0.5561 | 0.5246 | 0.5440 | 0.6177 | 0.4808 | 0.5687 |
| 801 | cg24450631 | 0.3031 | 0.3752 | 0.3345 | 0.3253 | 0.3471 | 0.3075 | 0.3225 | 0.3234 | 0.3808 | 0.3887 | 0.3807 | 0.3794 | 0.3462 | 0.3571 |
| 802 | cg24459209 | 0.8315 | 0.8603 | 0.8503 | 0.8537 | 0.8607 | 0.8410 | 0.8478 | 0.8536 | 0.8440 | 0.7923 | 0.8495 | 0.8496 | 0.8239 | 0.8206 |
| 803 | cg24469977 | 0.8496 | 0.8455 | 0.8580 | 0.8571 | 0.8579 | 0.8475 | 0.8590 | 0.8344 | 0.8613 | 0.8574 | 0.8335 | 0.8493 | 0.8783 | 0.7914 |
| 804 | cg24499411 | 0.7246 | 0.8140 | 0.7877 | 0.7815 | 0.8272 | 0.7381 | 0.7754 | 0.8112 | 0.8258 | 0.7583 | 0.7882 | 0.7678 | 0.7313 | 0.7284 |
| 805 | cg24556026 | 0.6281 | 0.6648 | 0.5585 | 0.6643 | 0.7002 | 0.6403 | 0.6574 | 0.6306 | 0.6601 | 0.6564 | 0.7460 | 0.7501 | 0.6827 | 0.7131 |
| 806 | cg24603941 | 0.8089 | 0.8168 | 0.7882 | 0.8199 | 0.8372 | 0.8697 | 0.8332 | 0.8195 | 0.8192 | 0.8356 | 0.8445 | 0.8592 | 0.7884 | 0.7826 |
| 807 | cg24648061 | 0.6934 | 0.7239 | 0.6986 | 0.7118 | 0.7030 | 0.6749 | 0.7018 | 0.7102 | 0.7230 | 0.7304 | 0.6975 | 0.6780 | 0.7144 | 0.6872 |
| 808 | cg24654547 | 0.0284 | 0.0995 | 0.0367 | 0.0375 | 0.0916 | 0.0258 | 0.0321 | 0.0527 | 0.0768 | 0.0692 | 0.0598 | 0.0400 | 0.0565 | 0.0241 |
| 809 | cg24655310 | 0.8165 | 0.6842 | 0.8734 | 0.8987 | 0.6937 | 0.7242 | 0.8893 | 0.8252 | 0.7436 | 0.8516 | 0.7032 | 0.8643 | 0.8179 | 0.8188 |
| 810 | cg24678320 | 0.8355 | 0.7883 | 0.8132 | 0.8210 | 0.8560 | 0.8207 | 0.8498 | 0.8039 | 0.8530 | 0.8123 | 0.8170 | 0.8508 | 0.7721 | 0.8635 |
| 811 | cg24735489 | 0.5063 | 0.4855 | 0.4716 | 0.4093 | 0.5519 | 0.4761 | 0.4087 | 0.4694 | 0.5427 | 0.4740 | 0.4709 | 0.5032 | 0.3897 | 0.4877 |
| 812 | cg24760768 | 0.9264 | 0.9396 | 0.9415 | 0.9300 | 0.9302 | 0.9401 | 0.9285 | 0.9382 | 0.9291 | 0.9293 | 0.9216 | 0.9334 | 0.9370 | 0.8979 |
| 813 | cg24776019 | 0.8191 | 0.8451 | 0.8556 | 0.8458 | 0.8448 | 0.8548 | 0.8482 | 0.8327 | 0.8479 | 0.8402 | 0.8508 | 0.8426 | 0.8296 | 0.8163 |
| 814 | cg24816298 | 0.7948 | 0.8117 | 0.8389 | 0.7886 | 0.8306 | 0.7989 | 0.8214 | 0.8449 | 0.8164 | 0.8251 | 0.8161 | 0.8150 | 0.8149 | 0.8021 |
| 815 | cg24820250 | 0.8332 | 0.8143 | 0.8575 | 0.8373 | 0.8424 | 0.8397 | 0.8483 | 0.8339 | 0.8569 | 0.8435 | 0.8046 | 0.8138 | 0.8560 | 0.7961 |
| 816 | cg24829483 | 0.8502 | 0.8700 | 0.8574 | 0.8629 | 0.8335 | 0.8542 | 0.8568 | 0.8528 | 0.8734 | 0.8499 | 0.8450 | 0.8359 | 0.8360 | 0.8180 |
| 817 | cg24831427 | 0.8086 | 0.7680 | 0.7962 | 0.8243 | 0.7821 | 0.7540 | 0.8049 | 0.8087 | 0.7456 | 0.8019 | 0.7904 | 0.7981 | 0.7467 | 0.7464 |
| 818 | cg24899750 | 0.6752 | 0.6554 | 0.6292 | 0.7153 | 0.6514 | 0.6109 | 0.6351 | 0.6358 | 0.6324 | 0.7034 | 0.6643 | 0.6854 | 0.6617 | 0.6654 |
| 819 | cg24949049 | 0.8807 | 0.8579 | 0.8907 | 0.8773 | 0.8847 | 0.8963 | 0.8855 | 0.8822 | 0.8511 | 0.8684 | 0.8722 | 0.8661 | 0.8645 | 0.8621 |
| 820 | cg24956866 | 0.6400 | 0.6626 | 0.5908 | 0.6124 | 0.6626 | 0.6457 | 0.6719 | 0.5734 | 0.6359 | 0.5965 | 0.6146 | 0.6915 | 0.7044 | 0.6604 |
| 821 | cg24999727 | 0.8233 | 0.8385 | 0.8514 | 0.8434 | 0.8521 | 0.8251 | 0.8377 | 0.8443 | 0.8337 | 0.8224 | 0.8408 | 0.8589 | 0.8197 | 0.7986 |

|     |            |        |        |        |        |        |        |        |        |        |        |        |        |        |        |
|-----|------------|--------|--------|--------|--------|--------|--------|--------|--------|--------|--------|--------|--------|--------|--------|
| 822 | cg25004981 | 0.7604 | 0.6362 | 0.6618 | 0.8510 | 0.8119 | 0.6347 | 0.8901 | 0.8877 | 0.8865 | 0.7226 | 0.8701 | 0.8222 | 0.7814 | 0.6594 |
| 823 | cg25032865 | 0.7822 | 0.8140 | 0.8111 | 0.7800 | 0.8190 | 0.7942 | 0.8279 | 0.8285 | 0.7974 | 0.8023 | 0.8074 | 0.8279 | 0.8125 | 0.7906 |
| 824 | cg25040282 | 0.7250 | 0.7730 | 0.7883 | 0.7565 | 0.7833 | 0.7360 | 0.7695 | 0.7624 | 0.7715 | 0.7793 | 0.7444 | 0.7405 | 0.7559 | 0.7127 |
| 825 | cg25106358 | 0.8616 | 0.8685 | 0.8927 | 0.8817 | 0.8866 | 0.8652 | 0.8622 | 0.8775 | 0.8657 | 0.8808 | 0.8648 | 0.8468 | 0.8649 | 0.8394 |
| 826 | cg25112853 | 0.7710 | 0.7307 | 0.7769 | 0.8085 | 0.8194 | 0.7731 | 0.7712 | 0.7618 | 0.7391 | 0.7118 | 0.7629 | 0.7139 | 0.7755 | 0.7582 |
| 827 | cg25133685 | 0.5180 | 0.3640 | 0.4560 | 0.5526 | 0.4461 | 0.6538 | 0.4844 | 0.5153 | 0.5304 | 0.4739 | 0.4223 | 0.4559 | 0.5043 | 0.3654 |
| 828 | cg25157408 | 0.7966 | 0.8024 | 0.8315 | 0.8154 | 0.8155 | 0.7956 | 0.8421 | 0.8104 | 0.7978 | 0.8001 | 0.8178 | 0.7949 | 0.7988 | 0.7788 |
| 829 | cg25159668 | 0.7187 | 0.7677 | 0.7613 | 0.7267 | 0.7811 | 0.7334 | 0.7566 | 0.7401 | 0.7223 | 0.7464 | 0.7399 | 0.7206 | 0.7620 | 0.7141 |
| 830 | cg25177139 | 0.8870 | 0.8722 | 0.9137 | 0.8856 | 0.9033 | 0.9004 | 0.8905 | 0.8893 | 0.8914 | 0.8713 | 0.8871 | 0.8989 | 0.8765 | 0.8646 |
| 831 | cg25217765 | 0.8434 | 0.8577 | 0.8749 | 0.8391 | 0.8818 | 0.8508 | 0.8741 | 0.8302 | 0.8776 | 0.8431 | 0.8533 | 0.8559 | 0.8623 | 0.8069 |
| 832 | cg25375711 | 0.0349 | 0.0335 | 0.2974 | 0.1863 | 0.0328 | 0.0349 | 0.0303 | 0.0308 | 0.0409 | 0.0373 | 0.0388 | 0.0396 | 0.0370 | 0.0413 |
| 833 | cg25397076 | 0.0287 | 0.0501 | 0.0417 | 0.0413 | 0.0280 | 0.0265 | 0.0228 | 0.3579 | 0.0354 | 0.0351 | 0.0399 | 0.0352 | 0.0324 | 0.0362 |
| 834 | cg25414165 | 0.7244 | 0.6949 | 0.7258 | 0.7000 | 0.7611 | 0.8005 | 0.7159 | 0.7909 | 0.7722 | 0.7998 | 0.7384 | 0.7294 | 0.7602 | 0.7066 |
| 835 | cg25427580 | 0.9023 | 0.9081 | 0.9224 | 0.9184 | 0.9176 | 0.9135 | 0.9178 | 0.9063 | 0.9150 | 0.9168 | 0.9122 | 0.9134 | 0.9183 | 0.8570 |
| 836 | cg25427638 | 0.8464 | 0.5572 | 0.6947 | 0.8542 | 0.8622 | 0.8369 | 0.8563 | 0.8608 | 0.8746 | 0.8293 | 0.6636 | 0.6768 | 0.8264 | 0.8690 |
| 837 | cg25463135 | 0.8035 | 0.8531 | 0.8684 | 0.8239 | 0.8527 | 0.8403 | 0.8306 | 0.8627 | 0.8299 | 0.8389 | 0.8340 | 0.8315 | 0.8211 | 0.7614 |
| 838 | cg25463409 | 0.7700 | 0.7933 | 0.7804 | 0.7146 | 0.7780 | 0.7911 | 0.7719 | 0.7574 | 0.7974 | 0.7939 | 0.7765 | 0.7799 | 0.7824 | 0.7381 |
| 839 | cg25494064 | 0.7794 | 0.8181 | 0.8130 | 0.8199 | 0.8113 | 0.8051 | 0.8132 | 0.8254 | 0.8183 | 0.8194 | 0.8253 | 0.8221 | 0.8040 | 0.7819 |
| 840 | cg25500444 | 0.2424 | 0.2079 | 0.1757 | 0.2426 | 0.2523 | 0.2668 | 0.2896 | 0.1885 | 0.2329 | 0.2214 | 0.2878 | 0.2509 | 0.2419 | 0.2349 |
| 841 | cg25567232 | 0.8321 | 0.8441 | 0.8464 | 0.8477 | 0.8546 | 0.8591 | 0.8551 | 0.8292 | 0.8666 | 0.8492 | 0.8550 | 0.8402 | 0.8356 | 0.8101 |
| 842 | cg25569462 | 0.7331 | 0.8804 | 0.9146 | 0.9032 | 0.7842 | 0.9067 | 0.9070 | 0.9194 | 0.8952 | 0.6557 | 0.8741 | 0.8892 | 0.6928 | 0.6820 |
| 843 | cg25575065 | 0.0907 | 0.1252 | 0.1182 | 0.1632 | 0.1134 | 0.1380 | 0.0617 | 0.2667 | 0.2804 | 0.0774 | 0.3272 | 0.3495 | 0.1379 | 0.0815 |
| 844 | cg25600236 | 0.6714 | 0.6913 | 0.7559 | 0.6756 | 0.6621 | 0.6953 | 0.7168 | 0.7066 | 0.7386 | 0.6946 | 0.7057 | 0.7053 | 0.6945 | 0.6530 |
| 845 | cg25608949 | 0.7836 | 0.8008 | 0.8088 | 0.7689 | 0.8157 | 0.8070 | 0.8069 | 0.8301 | 0.8084 | 0.7913 | 0.8053 | 0.8304 | 0.7900 | 0.7768 |
| 846 | cg25651505 | 0.1888 | 0.1957 | 0.3044 | 0.2076 | 0.4078 | 0.2380 | 0.2573 | 0.1678 | 0.1722 | 0.2407 | 0.2379 | 0.2523 | 0.2477 | 0.3140 |
| 847 | cg25677688 | 0.8595 | 0.8354 | 0.8710 | 0.7510 | 0.7740 | 0.8541 | 0.8701 | 0.8203 | 0.8311 | 0.8592 | 0.8261 | 0.7878 | 0.7667 | 0.6966 |
| 848 | cg25692621 | 0.7055 | 0.7523 | 0.7651 | 0.7291 | 0.7792 | 0.7212 | 0.7453 | 0.7769 | 0.7639 | 0.7668 | 0.7397 | 0.7608 | 0.7621 | 0.6863 |
| 849 | cg25697314 | 0.7295 | 0.7479 | 0.7596 | 0.7597 | 0.7608 | 0.7541 | 0.7452 | 0.7801 | 0.7788 | 0.6869 | 0.7623 | 0.7633 | 0.7702 | 0.7688 |
| 850 | cg25737836 | 0.8190 | 0.8550 | 0.8509 | 0.8642 | 0.8539 | 0.8541 | 0.8376 | 0.8371 | 0.8372 | 0.8640 | 0.8672 | 0.8423 | 0.8616 | 0.7857 |
| 851 | cg25769980 | 0.8874 | 0.9028 | 0.9129 | 0.8867 | 0.8999 | 0.8929 | 0.9007 | 0.9002 | 0.8884 | 0.8970 | 0.9052 | 0.9009 | 0.9050 | 0.8742 |
| 852 | cg25864727 | 0.8209 | 0.8447 | 0.8447 | 0.8256 | 0.8435 | 0.8350 | 0.8449 | 0.8240 | 0.8447 | 0.8238 | 0.8182 | 0.8217 | 0.8288 | 0.7653 |
| 853 | cg25892041 | 0.8520 | 0.8098 | 0.8520 | 0.8422 | 0.8429 | 0.8264 | 0.8425 | 0.8155 | 0.8106 | 0.8277 | 0.8240 | 0.8034 | 0.8312 | 0.7931 |
| 854 | cg26050734 | 0.3639 | 0.3730 | 0.2768 | 0.3347 | 0.3609 | 0.3367 | 0.3405 | 0.3437 | 0.4133 | 0.3614 | 0.3611 | 0.4042 | 0.3900 | 0.3858 |
| 855 | cg26059632 | 0.6928 | 0.6947 | 0.7203 | 0.7017 | 0.7255 | 0.7202 | 0.6912 | 0.7849 | 0.6887 | 0.6918 | 0.7338 | 0.6949 | 0.7182 | 0.7160 |
| 856 | cg26073856 | 0.6961 | 0.7124 | 0.7840 | 0.7083 | 0.7223 | 0.7162 | 0.7472 | 0.7460 | 0.7218 | 0.7311 | 0.6851 | 0.6907 | 0.7157 | 0.6658 |
| 857 | cg26081812 | 0.8131 | 0.8480 | 0.8561 | 0.7782 | 0.8042 | 0.8286 | 0.8243 | 0.8077 | 0.8197 | 0.8255 | 0.8175 | 0.8148 | 0.8103 | 0.7431 |
| 858 | cg26106720 | 0.8273 | 0.8637 | 0.8918 | 0.8735 | 0.8810 | 0.8797 | 0.8618 | 0.8717 | 0.8741 | 0.8695 | 0.8691 | 0.8769 | 0.8557 | 0.8166 |
| 859 | cg26109803 | 0.7925 | 0.7870 | 0.8089 | 0.7906 | 0.7962 | 0.7905 | 0.8169 | 0.8164 | 0.7880 | 0.7789 | 0.7933 | 0.7533 | 0.8041 | 0.7070 |
| 860 | cg26117431 | 0.8532 | 0.8680 | 0.8773 | 0.8478 | 0.8667 | 0.8484 | 0.8671 | 0.8642 | 0.8531 | 0.8521 | 0.8335 | 0.8644 | 0.8589 | 0.8224 |
| 861 | cg26159933 | 0.7440 | 0.8234 | 0.7878 | 0.7544 | 0.7839 | 0.7694 | 0.7777 | 0.7683 | 0.8006 | 0.8002 | 0.8084 | 0.8104 | 0.8187 | 0.7158 |
| 862 | cg26170257 | 0.7809 | 0.8030 | 0.8163 | 0.7885 | 0.8115 | 0.7872 | 0.8039 | 0.8016 | 0.8210 | 0.8015 | 0.8060 | 0.8120 | 0.8062 | 0.7596 |
| 863 | cg26205432 | 0.6327 | 0.6827 | 0.6859 | 0.6826 | 0.6589 | 0.7133 | 0.6770 | 0.6606 | 0.7309 | 0.7157 | 0.6973 | 0.6698 | 0.7253 | 0.6539 |
| 864 | cg26238727 | 0.8655 | 0.8569 | 0.8841 | 0.8616 | 0.8646 | 0.8708 | 0.8874 | 0.8772 | 0.8802 | 0.8702 | 0.8773 | 0.8600 | 0.8636 | 0.8222 |
| 865 | cg26247501 | 0.7450 | 0.7402 | 0.8318 | 0.7780 | 0.7891 | 0.8036 | 0.8014 | 0.7802 | 0.8145 | 0.8036 | 0.7878 | 0.7789 | 0.7723 | 0.7312 |
| 866 | cg26256793 | 0.2952 | 0.2572 | 0.1896 | 0.2541 | 0.2904 | 0.2422 | 0.2404 | 0.1432 | 0.3216 | 0.2410 | 0.2605 | 0.2513 | 0.2934 | 0.2228 |
| 867 | cg26264314 | 0.4062 | 0.8791 | 0.8894 | 0.8615 | 0.8686 | 0.8486 | 0.8804 | 0.8131 | 0.3821 | 0.8451 | 0.8321 | 0.8526 | 0.8422 | 0.8672 |
| 868 | cg26266326 | 0.7687 | 0.8352 | 0.8627 | 0.8203 | 0.8304 | 0.8207 | 0.8316 | 0.8155 | 0.8398 | 0.8235 | 0.8076 | 0.7720 | 0.8486 | 0.7970 |
| 869 | cg26267038 | 0.5872 | 0.0641 | 0.0415 | 0.0585 | 0.0496 | 0.0434 | 0.0457 | 0.0340 | 0.5606 | 0.0608 | 0.4859 | 0.5633 | 0.5796 | 0.0521 |
| 870 | cg26390526 | 0.8783 | 0.8930 | 0.9010 | 0.8845 | 0.8943 | 0.8987 | 0.8715 | 0.8309 | 0.8982 | 0.8948 | 0.8681 | 0.8673 | 0.8817 | 0.8743 |
| 871 | cg26443244 | 0.6973 | 0.6876 | 0.7107 | 0.7163 | 0.7226 | 0.7035 | 0.7149 | 0.7154 | 0.7454 | 0.6619 | 0.7024 | 0.6882 | 0.6723 | 0.6871 |
| 872 | cg26470338 | 0.7701 | 0.6812 | 0.7544 | 0.6902 | 0.7612 | 0.7264 | 0.8138 | 0.7681 | 0.7953 | 0.7427 | 0.7548 | 0.7858 | 0.7614 | 0.6563 |
| 873 | cg26514942 | 0.8352 | 0.8658 | 0.8664 | 0.8526 | 0.8550 | 0.8805 | 0.8678 | 0.8618 | 0.8708 | 0.8603 | 0.8323 | 0.8583 | 0.8604 | 0.8386 |

|     |            |        |        |        |        |        |        |        |        |        |        |        |        |        |        |
|-----|------------|--------|--------|--------|--------|--------|--------|--------|--------|--------|--------|--------|--------|--------|--------|
| 874 | cg26532905 | 0.7800 | 0.8067 | 0.8170 | 0.7698 | 0.7814 | 0.7996 | 0.7767 | 0.7889 | 0.7708 | 0.7697 | 0.8026 | 0.7789 | 0.7705 | 0.7512 |
| 875 | cg26583078 | 0.8815 | 0.8949 | 0.9075 | 0.8897 | 0.9079 | 0.8958 | 0.8946 | 0.9024 | 0.9024 | 0.9049 | 0.8899 | 0.8879 | 0.9062 | 0.8545 |
| 876 | cg26594488 | 0.7760 | 0.7948 | 0.8049 | 0.7789 | 0.7918 | 0.8069 | 0.7967 | 0.7514 | 0.7944 | 0.8089 | 0.7681 | 0.7689 | 0.7858 | 0.7094 |
| 877 | cg26666286 | 0.8387 | 0.8441 | 0.8568 | 0.8626 | 0.8648 | 0.8629 | 0.8711 | 0.8769 | 0.8573 | 0.8542 | 0.8684 | 0.8567 | 0.8571 | 0.8408 |
| 878 | cg26675077 | 0.8165 | 0.6935 | 0.6872 | 0.6439 | 0.6900 | 0.6104 | 0.7232 | 0.5971 | 0.6878 | 0.6810 | 0.6857 | 0.6933 | 0.7207 | 0.7290 |
| 879 | cg26682500 | 0.8237 | 0.8315 | 0.8330 | 0.8129 | 0.8230 | 0.8104 | 0.8264 | 0.7804 | 0.8296 | 0.8182 | 0.8282 | 0.8056 | 0.8282 | 0.8044 |
| 880 | cg26699283 | 0.1008 | 0.1055 | 0.0900 | 0.0993 | 0.1122 | 0.0887 | 0.1188 | 0.0892 | 0.1138 | 0.1179 | 0.1051 | 0.1160 | 0.1050 | 0.0957 |
| 881 | cg26706003 | 0.5550 | 0.6077 | 0.5669 | 0.5407 | 0.5892 | 0.5861 | 0.5498 | 0.5749 | 0.5320 | 0.5799 | 0.5977 | 0.6136 | 0.5878 | 0.5565 |
| 882 | cg26766480 | 0.7864 | 0.7782 | 0.8164 | 0.7592 | 0.8043 | 0.7789 | 0.7858 | 0.8137 | 0.8059 | 0.7915 | 0.8020 | 0.8071 | 0.8078 | 0.7752 |
| 883 | cg26822175 | 0.8658 | 0.8778 | 0.8872 | 0.8896 | 0.4841 | 0.8809 | 0.8903 | 0.8809 | 0.8821 | 0.8813 | 0.8686 | 0.8757 | 0.0691 | 0.8843 |
| 884 | cg26847490 | 0.7116 | 0.7635 | 0.7216 | 0.7579 | 0.7594 | 0.7161 | 0.7510 | 0.7528 | 0.7425 | 0.7461 | 0.7737 | 0.7656 | 0.7525 | 0.6878 |
| 885 | cg26851800 | 0.8018 | 0.8307 | 0.8357 | 0.7850 | 0.8304 | 0.7739 | 0.8000 | 0.8009 | 0.8354 | 0.8325 | 0.8070 | 0.7879 | 0.8040 | 0.7759 |
| 886 | cg26853855 | 0.7484 | 0.7673 | 0.7805 | 0.7590 | 0.7678 | 0.7532 | 0.7682 | 0.7662 | 0.7541 | 0.7587 | 0.7310 | 0.7335 | 0.7534 | 0.7280 |
| 887 | cg26866014 | 0.8200 | 0.8318 | 0.8625 | 0.8149 | 0.8106 | 0.8201 | 0.8363 | 0.8287 | 0.8266 | 0.8522 | 0.8443 | 0.8184 | 0.8178 | 0.7900 |
| 888 | cg26960719 | 0.7875 | 0.8271 | 0.8000 | 0.8028 | 0.8175 | 0.7897 | 0.8090 | 0.8350 | 0.8163 | 0.8138 | 0.7940 | 0.8231 | 0.8244 | 0.7687 |
| 889 | cg26981881 | 0.7754 | 0.8092 | 0.7915 | 0.7796 | 0.7876 | 0.8121 | 0.7760 | 0.7851 | 0.8134 | 0.7839 | 0.8017 | 0.7876 | 0.8017 | 0.7623 |
| 890 | cg26987645 | 0.6379 | 0.3175 | 0.3744 | 0.3160 | 0.5017 | 0.3800 | 0.4018 | 0.5517 | 0.6006 | 0.4018 | 0.5756 | 0.3676 | 0.3450 | 0.3224 |
| 891 | cg26989103 | 0.6460 | 0.6813 | 0.7086 | 0.6658 | 0.7044 | 0.6477 | 0.7251 | 0.6910 | 0.6695 | 0.7033 | 0.7004 | 0.7371 | 0.6803 | 0.6697 |
| 892 | cg27003571 | 0.7241 | 0.7430 | 0.7565 | 0.7223 | 0.7328 | 0.7395 | 0.7401 | 0.7399 | 0.7254 | 0.7494 | 0.7416 | 0.7146 | 0.7463 | 0.7041 |
| 893 | cg27063986 | 0.8962 | 0.8985 | 0.9138 | 0.9111 | 0.9155 | 0.8968 | 0.9064 | 0.8951 | 0.9089 | 0.8999 | 0.8920 | 0.9005 | 0.8915 | 0.8816 |
| 894 | cg27105123 | 0.3589 | 0.7007 | 0.3588 | 0.3492 | 0.7008 | 0.3472 | 0.6769 | 0.6387 | 0.6266 | 0.3964 | 0.1357 | 0.1491 | 0.6583 | 0.6395 |
| 895 | cg27149093 | 0.7766 | 0.7963 | 0.8200 | 0.7703 | 0.8061 | 0.8104 | 0.7838 | 0.8255 | 0.8013 | 0.8144 | 0.7873 | 0.7875 | 0.7992 | 0.7449 |
| 896 | cg27168844 | 0.7924 | 0.7884 | 0.8142 | 0.7776 | 0.8153 | 0.8072 | 0.8230 | 0.7915 | 0.7740 | 0.7902 | 0.8022 | 0.7792 | 0.8321 | 0.7510 |
| 897 | cg27190239 | 0.7862 | 0.6941 | 0.7494 | 0.7330 | 0.7285 | 0.7123 | 0.7483 | 0.7261 | 0.7081 | 0.7149 | 0.7296 | 0.7201 | 0.7654 | 0.6428 |
| 898 | cg27195224 | 0.7001 | 0.7519 | 0.7711 | 0.7363 | 0.7510 | 0.7762 | 0.7746 | 0.7720 | 0.7484 | 0.7179 | 0.7541 | 0.7486 | 0.7538 | 0.7106 |
| 899 | cg27202708 | 0.3378 | 0.3621 | 0.3917 | 0.3101 | 0.2346 | 0.3830 | 0.5760 | 0.3438 | 0.3157 | 0.4136 | 0.3694 | 0.3498 | 0.4179 | 0.2965 |
| 900 | cg27226214 | 0.8297 | 0.8443 | 0.8520 | 0.8581 | 0.8721 | 0.8642 | 0.8756 | 0.8667 | 0.8326 | 0.8439 | 0.8483 | 0.8408 | 0.8414 | 0.7998 |
| 901 | cg27227156 | 0.7184 | 0.7772 | 0.7710 | 0.7602 | 0.7862 | 0.7939 | 0.7866 | 0.7555 | 0.7798 | 0.7605 | 0.7847 | 0.7979 | 0.7959 | 0.7228 |
| 902 | cg27297176 | 0.8120 | 0.8121 | 0.8411 | 0.8017 | 0.8221 | 0.8064 | 0.8327 | 0.8247 | 0.8291 | 0.8279 | 0.8080 | 0.8095 | 0.8180 | 0.7821 |
| 903 | cg27345534 | 0.6734 | 0.7305 | 0.7185 | 0.7487 | 0.7452 | 0.7804 | 0.7398 | 0.7177 | 0.7850 | 0.7944 | 0.7503 | 0.7533 | 0.7611 | 0.7162 |
| 904 | cg27351998 | 0.8627 | 0.8868 | 0.8939 | 0.8893 | 0.8912 | 0.8839 | 0.8864 | 0.8624 | 0.8917 | 0.8949 | 0.8983 | 0.8743 | 0.8801 | 0.8349 |
| 905 | cg27377450 | 0.9031 | 0.8983 | 0.9102 | 0.9061 | 0.9099 | 0.9203 | 0.9189 | 0.9184 | 0.8959 | 0.8890 | 0.9055 | 0.8937 | 0.8850 | 0.8687 |
| 906 | cg27456885 | 0.7893 | 0.7671 | 0.8108 | 0.7793 | 0.8083 | 0.7884 | 0.8103 | 0.8167 | 0.7797 | 0.7780 | 0.8044 | 0.7578 | 0.7994 | 0.7292 |
| 907 | cg27459381 | 0.8740 | 0.8856 | 0.8753 | 0.8595 | 0.8701 | 0.8698 | 0.8915 | 0.8865 | 0.8734 | 0.8778 | 0.8922 | 0.8907 | 0.8875 | 0.8626 |
| 908 | cg27488807 | 0.7138 | 0.7076 | 0.7409 | 0.7545 | 0.7501 | 0.7168 | 0.7715 | 0.7685 | 0.7591 | 0.7584 | 0.7618 | 0.7425 | 0.7580 | 0.7276 |
| 909 | cg27497781 | 0.7761 | 0.8053 | 0.8400 | 0.8047 | 0.8146 | 0.7605 | 0.8366 | 0.8264 | 0.8305 | 0.8108 | 0.8384 | 0.8091 | 0.7939 | 0.7473 |
| 910 | cg27541541 | 0.7168 | 0.7651 | 0.7756 | 0.7607 | 0.7384 | 0.7707 | 0.7604 | 0.7297 | 0.7527 | 0.7559 | 0.7668 | 0.7694 | 0.7692 | 0.6948 |
| 911 | cg27547703 | 0.8821 | 0.8635 | 0.8974 | 0.8855 | 0.8870 | 0.8897 | 0.9005 | 0.8772 | 0.8379 | 0.8692 | 0.8605 | 0.8620 | 0.8545 | 0.8075 |
| 912 | cg27562023 | 0.7033 | 0.7405 | 0.7015 | 0.7249 | 0.8009 | 0.7348 | 0.7555 | 0.7327 | 0.7653 | 0.7265 | 0.7361 | 0.7723 | 0.7741 | 0.7347 |
| 913 | cg27585441 | 0.6814 | 0.7466 | 0.7624 | 0.7223 | 0.7321 | 0.7048 | 0.7510 | 0.7183 | 0.7324 | 0.7565 | 0.7074 | 0.7457 | 0.7445 | 0.6762 |
| 914 | cg27609819 | 0.8218 | 0.8297 | 0.8647 | 0.8287 | 0.8321 | 0.8261 | 0.8342 | 0.8525 | 0.8463 | 0.8455 | 0.8468 | 0.8377 | 0.8245 | 0.8001 |

Table S3 (Continuation)

| N  | TargetID   | Ctr1629<br>M_7 | Ctr1350<br>F_7 | Ctrb901<br>M_7 | Ctr1415<br>M_7 | Ctr1435<br>F_8 | Ctr1640<br>M_8 | Ctr1724<br>M_8 | Ctr0018<br>M_8 | Ctr0028<br>M_8 | Ctrb9131<br>M_9 | Ctrb841<br>F_10 | Ctrb925<br>F_10 | Ctr1617<br>M_10 | Ctrb808<br>M_10 |
|----|------------|----------------|----------------|----------------|----------------|----------------|----------------|----------------|----------------|----------------|-----------------|-----------------|-----------------|-----------------|-----------------|
| 1  | cg00079056 | 0.7758         | 0.8358         | 0.7841         | 0.8306         | 0.8292         | 0.8004         | 0.8195         | 0.8294         | 0.8233         | 0.8223          | 0.7924          | 0.8569          | 0.7507          | 0.7886          |
| 2  | cg00132141 | 0.5960         | 0.6633         | 0.6923         | 0.7065         | 0.6820         | 0.6109         | 0.5970         | 0.6987         | 0.6848         | 0.7003          | 0.6725          | 0.6951          | 0.6387          | 0.6508          |
| 3  | cg00134539 | 0.4011         | 0.5909         | 0.4757         | 0.5868         | 0.4257         | 0.5955         | 0.3033         | 0.5314         | 0.4572         | 0.4223          | 0.4992          | 0.3873          | 0.4259          | 0.5406          |
| 4  | cg00183782 | 0.5771         | 0.7366         | 0.7776         | 0.7316         | 0.7489         | 0.5895         | 0.6351         | 0.7424         | 0.7356         | 0.7323          | 0.7596          | 0.6994          | 0.7166          | 0.6995          |
| 5  | cg00364814 | 0.7361         | 0.8512         | 0.8838         | 0.8746         | 0.8697         | 0.7340         | 0.7378         | 0.8560         | 0.8239         | 0.8601          | 0.8617          | 0.8519          | 0.8399          | 0.8297          |
| 6  | cg00393585 | 0.0730         | 0.0819         | 0.0780         | 0.1309         | 0.0660         | 0.4707         | 0.0872         | 0.0774         | 0.0916         | 0.2597          | 0.2577          | 0.0827          | 0.0941          | 0.0738          |
| 7  | cg00398048 | 0.3794         | 0.4084         | 0.4069         | 0.4088         | 0.5770         | 0.3026         | 0.4040         | 0.3161         | 0.4502         | 0.4068          | 0.3619          | 0.4107          | 0.4293          | 0.4355          |
| 8  | cg00410895 | 0.7633         | 0.8358         | 0.8905         | 0.8733         | 0.8788         | 0.7671         | 0.7686         | 0.8542         | 0.8446         | 0.8593          | 0.8594          | 0.8629          | 0.8424          | 0.8221          |
| 9  | cg00436282 | 0.6391         | 0.8245         | 0.8481         | 0.8392         | 0.8428         | 0.7387         | 0.7454         | 0.8058         | 0.8336         | 0.8542          | 0.8433          | 0.8403          | 0.8214          | 0.8040          |
| 10 | cg00461841 | 0.5112         | 0.6519         | 0.7789         | 0.7134         | 0.7037         | 0.5195         | 0.5372         | 0.6979         | 0.7333         | 0.7242          | 0.6589          | 0.6239          | 0.5138          | 0.6646          |
| 11 | cg00519208 | 0.6648         | 0.7196         | 0.7684         | 0.8004         | 0.8039         | 0.6970         | 0.6571         | 0.7789         | 0.7751         | 0.7953          | 0.7730          | 0.8049          | 0.7232          | 0.7125          |
| 12 | cg00539322 | 0.6876         | 0.7218         | 0.7609         | 0.7615         | 0.7514         | 0.6322         | 0.6618         | 0.7088         | 0.7183         | 0.7439          | 0.7155          | 0.7144          | 0.6886          | 0.7033          |
| 13 | cg00550617 | 0.6115         | 0.6133         | 0.7044         | 0.6758         | 0.6835         | 0.5471         | 0.5746         | 0.6939         | 0.6169         | 0.6963          | 0.6433          | 0.6219          | 0.5482          | 0.6467          |
| 14 | cg00577167 | 0.6664         | 0.7968         | 0.8157         | 0.8101         | 0.8112         | 0.6882         | 0.7020         | 0.8067         | 0.7843         | 0.8198          | 0.8082          | 0.7649          | 0.7645          | 0.7627          |
| 15 | cg00579393 | 0.6800         | 0.8009         | 0.8260         | 0.8109         | 0.8323         | 0.6801         | 0.6781         | 0.8001         | 0.8045         | 0.8194          | 0.8269          | 0.8444          | 0.7582          | 0.7937          |
| 16 | cg00594118 | 0.0603         | 0.0743         | 0.0866         | 0.1146         | 0.0702         | 0.0524         | 0.1533         | 0.2659         | 0.1620         | 0.0679          | 0.1569          | 0.0448          | 0.0772          | 0.0639          |
| 17 | cg00695416 | 0.0642         | 0.0388         | 0.0742         | 0.0806         | 0.0530         | 0.0409         | 0.0834         | 0.0396         | 0.4074         | 0.0484          | 0.0441          | 0.0521          | 0.1024          | 0.0538          |
| 18 | cg00722300 | 0.6607         | 0.7024         | 0.7776         | 0.7582         | 0.7728         | 0.6725         | 0.5831         | 0.7323         | 0.7674         | 0.7746          | 0.7376          | 0.7303          | 0.7652          | 0.7807          |
| 19 | cg00729708 | 0.4231         | 0.4332         | 0.6077         | 0.4149         | 0.9321         | 0.4146         | 0.4201         | 0.3929         | 0.9111         | 0.8242          | 0.4939          | 0.4259          | 0.7257          | 0.4474          |
| 20 | cg00745735 | 0.5878         | 0.7448         | 0.8066         | 0.7677         | 0.7499         | 0.6794         | 0.6748         | 0.7608         | 0.7864         | 0.7911          | 0.7790          | 0.7334          | 0.7107          | 0.6957          |
| 21 | cg00763889 | 0.8001         | 0.8175         | 0.8208         | 0.8441         | 0.8572         | 0.7914         | 0.7939         | 0.8248         | 0.7948         | 0.8448          | 0.8300          | 0.8002          | 0.7929          | 0.7778          |
| 22 | cg00911873 | 0.6525         | 0.7783         | 0.8443         | 0.8210         | 0.8007         | 0.7365         | 0.6996         | 0.8334         | 0.7962         | 0.8146          | 0.8053          | 0.7940          | 0.7293          | 0.7584          |
| 23 | cg00933411 | 0.4755         | 0.4612         | 0.3012         | 0.3420         | 0.4290         | 0.3528         | 0.3560         | 0.3852         | 0.4752         | 0.4113          | 0.4713          | 0.4498          | 0.4281          | 0.4189          |
| 24 | cg00949554 | 0.0956         | 0.1087         | 0.1911         | 0.1414         | 0.1115         | 0.0884         | 0.0742         | 0.1026         | 0.0879         | 0.1439          | 0.1234          | 0.1199          | 0.1307          | 0.1979          |
| 25 | cg01035238 | 0.6990         | 0.8215         | 0.8641         | 0.8419         | 0.8575         | 0.7398         | 0.7055         | 0.8337         | 0.8185         | 0.8449          | 0.8297          | 0.8173          | 0.8121          | 0.8386          |
| 26 | cg01120761 | 0.8050         | 0.8571         | 0.5986         | 0.8685         | 0.8741         | 0.2479         | 0.7488         | 0.8612         | 0.8450         | 0.8690          | 0.5927          | 0.8620          | 0.8256          | 0.6159          |
| 27 | cg01216369 | 0.7787         | 0.8782         | 0.9259         | 0.9123         | 0.9152         | 0.8158         | 0.8175         | 0.8894         | 0.8940         | 0.9117          | 0.9179          | 0.8837          | 0.8873          | 0.8833          |
| 28 | cg01243790 | 0.6945         | 0.7973         | 0.8566         | 0.8289         | 0.8467         | 0.7162         | 0.7124         | 0.8104         | 0.8210         | 0.8303          | 0.8257          | 0.8031          | 0.7761          | 0.8103          |
| 29 | cg01269048 | 0.6340         | 0.7488         | 0.7922         | 0.7469         | 0.7851         | 0.6327         | 0.6376         | 0.7611         | 0.7507         | 0.7741          | 0.7558          | 0.7451          | 0.7268          | 0.7483          |
| 30 | cg01309152 | 0.6817         | 0.7919         | 0.8459         | 0.8027         | 0.8397         | 0.6801         | 0.7024         | 0.8172         | 0.7796         | 0.8094          | 0.8169          | 0.7675          | 0.7894          | 0.7936          |
| 31 | cg01320507 | 0.6087         | 0.7324         | 0.7614         | 0.7359         | 0.7440         | 0.6230         | 0.6007         | 0.7267         | 0.7289         | 0.7446          | 0.7415          | 0.7311          | 0.6643          | 0.6856          |
| 32 | cg01324261 | 0.7286         | 0.8221         | 0.8531         | 0.8328         | 0.8319         | 0.7455         | 0.7259         | 0.8260         | 0.8155         | 0.8433          | 0.8219          | 0.8332          | 0.7699          | 0.8218          |
| 33 | cg01416012 | 0.6120         | 0.7433         | 0.7957         | 0.7449         | 0.7574         | 0.5727         | 0.6344         | 0.7170         | 0.7310         | 0.7551          | 0.7719          | 0.7431          | 0.6840          | 0.7140          |
| 34 | cg01517033 | 0.6759         | 0.7166         | 0.7726         | 0.7723         | 0.7542         | 0.6140         | 0.6755         | 0.7617         | 0.7326         | 0.7656          | 0.7399          | 0.7332          | 0.7388          | 0.7445          |
| 35 | cg01521624 | 0.7760         | 0.8478         | 0.8718         | 0.8378         | 0.8537         | 0.7619         | 0.7622         | 0.8510         | 0.8320         | 0.8544          | 0.8569          | 0.8179          | 0.7899          | 0.8190          |
| 36 | cg01541443 | 0.8066         | 0.8806         | 0.8676         | 0.8635         | 0.8783         | 0.8046         | 0.7879         | 0.8630         | 0.8241         | 0.8664          | 0.8521          | 0.7795          | 0.8203          | 0.8568          |
| 37 | cg01546046 | 0.2490         | 0.3862         | 0.3767         | 0.3433         | 0.3724         | 0.2293         | 0.2249         | 0.3698         | 0.3210         | 0.3853          | 0.3570          | 0.4369          | 0.3642          | 0.3478          |
| 38 | cg01549015 | 0.5777         | 0.7819         | 0.8502         | 0.8261         | 0.8189         | 0.6555         | 0.6683         | 0.8024         | 0.7876         | 0.8306          | 0.8176          | 0.8006          | 0.7301          | 0.7524          |
| 39 | cg01605517 | 0.6702         | 0.8100         | 0.8487         | 0.8421         | 0.8250         | 0.7007         | 0.7182         | 0.7938         | 0.8119         | 0.8396          | 0.8196          | 0.7889          | 0.8213          | 0.7346          |
| 40 | cg01623187 | 0.7602         | 0.7555         | 0.8068         | 0.8030         | 0.8219         | 0.7149         | 0.6924         | 0.7974         | 0.7756         | 0.7968          | 0.7845          | 0.7480          | 0.7441          | 0.7737          |
| 41 | cg01637734 | 0.6751         | 0.7808         | 0.8116         | 0.8005         | 0.8140         | 0.6783         | 0.6941         | 0.8001         | 0.7576         | 0.8118          | 0.7704          | 0.7409          | 0.7286          | 0.7842          |
| 42 | cg01714932 | 0.7085         | 0.8063         | 0.8252         | 0.8199         | 0.8280         | 0.7460         | 0.7323         | 0.8177         | 0.8041         | 0.8427          | 0.8419          | 0.8285          | 0.7963          | 0.8063          |
| 43 | cg01727899 | 0.4276         | 0.6224         | 0.6379         | 0.6181         | 0.6696         | 0.4649         | 0.5010         | 0.6092         | 0.5848         | 0.6302          | 0.6272          | 0.6311          | 0.5769          | 0.6134          |

|    |            |        |        |        |        |        |        |        |        |        |        |        |        |        |        |
|----|------------|--------|--------|--------|--------|--------|--------|--------|--------|--------|--------|--------|--------|--------|--------|
| 44 | cg01747191 | 0.7626 | 0.8661 | 0.8980 | 0.8864 | 0.8953 | 0.7638 | 0.7765 | 0.8757 | 0.8553 | 0.9074 | 0.8878 | 0.8567 | 0.8541 | 0.8725 |
| 45 | cg01804844 | 0.7690 | 0.8188 | 0.8536 | 0.8353 | 0.7952 | 0.7548 | 0.7293 | 0.8069 | 0.8124 | 0.8471 | 0.8476 | 0.8074 | 0.7753 | 0.7855 |
| 46 | cg01843018 | 0.6594 | 0.8068 | 0.8377 | 0.8110 | 0.8449 | 0.6749 | 0.6834 | 0.8021 | 0.8043 | 0.8204 | 0.7976 | 0.8138 | 0.7366 | 0.7725 |
| 47 | cg01871995 | 0.5882 | 0.7519 | 0.7429 | 0.7738 | 0.7490 | 0.6667 | 0.5662 | 0.7434 | 0.7566 | 0.7746 | 0.7404 | 0.7426 | 0.6544 | 0.7001 |
| 48 | cg01888566 | 0.0422 | 0.0522 | 0.0930 | 0.0968 | 0.0362 | 0.0510 | 0.3435 | 0.2330 | 0.0918 | 0.0380 | 0.0643 | 0.3061 | 0.0407 | 0.1100 |
| 49 | cg01894895 | 0.7806 | 0.8460 | 0.8677 | 0.8718 | 0.8823 | 0.7942 | 0.7756 | 0.8478 | 0.8606 | 0.8627 | 0.8747 | 0.8416 | 0.8448 | 0.8395 |
| 50 | cg01939443 | 0.7125 | 0.7910 | 0.8020 | 0.7869 | 0.7733 | 0.5998 | 0.6530 | 0.7719 | 0.7570 | 0.8012 | 0.8046 | 0.7343 | 0.7192 | 0.7815 |
| 51 | cg02019333 | 0.7157 | 0.5886 | 0.5871 | 0.6699 | 0.6661 | 0.6089 | 0.5392 | 0.6405 | 0.6666 | 0.6481 | 0.5997 | 0.6902 | 0.6883 | 0.7088 |
| 52 | cg02039053 | 0.5257 | 0.6406 | 0.7456 | 0.6874 | 0.7001 | 0.4968 | 0.5277 | 0.6733 | 0.6478 | 0.6870 | 0.6879 | 0.6837 | 0.6058 | 0.6499 |
| 53 | cg02046532 | 0.6873 | 0.7826 | 0.7765 | 0.7542 | 0.7577 | 0.7395 | 0.6435 | 0.8047 | 0.7024 | 0.7684 | 0.7736 | 0.7402 | 0.7075 | 0.7536 |
| 54 | cg02082342 | 0.7430 | 0.7826 | 0.7506 | 0.7715 | 0.7880 | 0.4786 | 0.7291 | 0.6760 | 0.7147 | 0.7112 | 0.7653 | 0.7418 | 0.7443 | 0.6510 |
| 55 | cg02123547 | 0.0846 | 0.0639 | 0.0902 | 0.2790 | 0.0706 | 0.1739 | 0.0676 | 0.0707 | 0.0763 | 0.1393 | 0.0796 | 0.1041 | 0.0721 | 0.0816 |
| 56 | cg02218214 | 0.5458 | 0.7566 | 0.8033 | 0.7722 | 0.7730 | 0.5987 | 0.6305 | 0.7601 | 0.7356 | 0.7991 | 0.8123 | 0.7548 | 0.7225 | 0.7513 |
| 57 | cg02241259 | 0.6647 | 0.7956 | 0.8521 | 0.8362 | 0.8111 | 0.7043 | 0.7018 | 0.8282 | 0.8109 | 0.8135 | 0.8277 | 0.7829 | 0.7725 | 0.7770 |
| 58 | cg02248486 | 0.7898 | 0.7832 | 0.8764 | 0.8117 | 0.8179 | 0.7425 | 0.7796 | 0.8097 | 0.7864 | 0.7075 | 0.5191 | 0.7841 | 0.7444 | 0.8069 |
| 59 | cg02255732 | 0.5336 | 0.7039 | 0.7289 | 0.7399 | 0.7009 | 0.5455 | 0.4901 | 0.7066 | 0.6468 | 0.7387 | 0.6903 | 0.6898 | 0.6676 | 0.7352 |
| 60 | cg02288165 | 0.7325 | 0.3692 | 0.7352 | 0.7349 | 0.7560 | 0.7030 | 0.6919 | 0.7503 | 0.3522 | 0.7429 | 0.7287 | 0.3382 | 0.3828 | 0.7521 |
| 61 | cg02382666 | 0.7511 | 0.8410 | 0.8508 | 0.8446 | 0.8560 | 0.7813 | 0.7075 | 0.8364 | 0.8566 | 0.8466 | 0.8479 | 0.8650 | 0.7706 | 0.7907 |
| 62 | cg02475653 | 0.6041 | 0.7784 | 0.8002 | 0.7877 | 0.8003 | 0.6648 | 0.6657 | 0.6850 | 0.7577 | 0.7978 | 0.7696 | 0.6872 | 0.7341 | 0.6914 |
| 63 | cg02552945 | 0.6140 | 0.8105 | 0.8436 | 0.8109 | 0.8189 | 0.6330 | 0.6725 | 0.8085 | 0.7972 | 0.8050 | 0.8352 | 0.7492 | 0.7630 | 0.7770 |
| 64 | cg02620013 | 0.2565 | 0.1649 | 0.2562 | 0.3248 | 0.2271 | 0.1340 | 0.2304 | 0.2827 | 0.2614 | 0.2429 | 0.2159 | 0.1886 | 0.3086 | 0.1911 |
| 65 | cg02624129 | 0.1787 | 0.1397 | 0.0347 | 0.2410 | 0.1596 | 0.1188 | 0.1242 | 0.2011 | 0.1459 | 0.1544 | 0.1399 | 0.2474 | 0.1444 | 0.0445 |
| 66 | cg02629312 | 0.7747 | 0.8739 | 0.9222 | 0.9031 | 0.8868 | 0.8018 | 0.7793 | 0.9147 | 0.8924 | 0.9015 | 0.8978 | 0.8681 | 0.8263 | 0.8591 |
| 67 | cg02655623 | 0.5993 | 0.6652 | 0.7678 | 0.7276 | 0.7511 | 0.6292 | 0.6057 | 0.7038 | 0.7082 | 0.7601 | 0.7190 | 0.7508 | 0.6565 | 0.6569 |
| 68 | cg02710161 | 0.5863 | 0.7474 | 0.8392 | 0.7876 | 0.8235 | 0.6669 | 0.6367 | 0.7813 | 0.7523 | 0.8028 | 0.7728 | 0.7097 | 0.7448 | 0.7522 |
| 69 | cg02741177 | 0.5419 | 0.7273 | 0.7324 | 0.7005 | 0.7634 | 0.6200 | 0.6184 | 0.7115 | 0.6874 | 0.7361 | 0.7228 | 0.6653 | 0.6704 | 0.6881 |
| 70 | cg02774963 | 0.8024 | 0.8514 | 0.8821 | 0.8646 | 0.8761 | 0.8035 | 0.7809 | 0.8560 | 0.8652 | 0.8717 | 0.8622 | 0.8846 | 0.8155 | 0.8387 |
| 71 | cg02776251 | 0.0760 | 0.0840 | 0.1262 | 0.1101 | 0.0928 | 0.0954 | 0.0733 | 0.2058 | 0.1700 | 0.2031 | 0.0911 | 0.1347 | 0.0824 | 0.0759 |
| 72 | cg02800334 | 0.5714 | 0.6932 | 0.7610 | 0.7186 | 0.7424 | 0.6002 | 0.5655 | 0.7484 | 0.7141 | 0.7437 | 0.6975 | 0.6842 | 0.6506 | 0.6855 |
| 73 | cg02807450 | 0.2021 | 0.1087 | 0.0666 | 0.1017 | 0.0952 | 0.1798 | 0.1885 | 0.1026 | 0.1241 | 0.0885 | 0.0905 | 0.1371 | 0.1107 | 0.1100 |
| 74 | cg02833180 | 0.7455 | 0.8224 | 0.8567 | 0.8559 | 0.8599 | 0.7834 | 0.7110 | 0.8472 | 0.8361 | 0.8379 | 0.8477 | 0.8208 | 0.7805 | 0.8260 |
| 75 | cg02880679 | 0.7002 | 0.8151 | 0.8343 | 0.8231 | 0.8372 | 0.7314 | 0.7000 | 0.8316 | 0.7910 | 0.8285 | 0.8280 | 0.8092 | 0.8154 | 0.8218 |
| 76 | cg02906939 | 0.8319 | 0.9154 | 0.9363 | 0.9135 | 0.9290 | 0.8565 | 0.8489 | 0.9060 | 0.9063 | 0.9220 | 0.9084 | 0.9128 | 0.8657 | 0.9027 |
| 77 | cg02912041 | 0.5754 | 0.7679 | 0.8442 | 0.7661 | 0.8034 | 0.6230 | 0.6186 | 0.7855 | 0.7741 | 0.8134 | 0.7114 | 0.7903 | 0.7615 | 0.7373 |
| 78 | cg02936740 | 0.5510 | 0.7139 | 0.7782 | 0.7571 | 0.7504 | 0.6474 | 0.6242 | 0.7650 | 0.7279 | 0.7568 | 0.7297 | 0.7028 | 0.6963 | 0.7119 |
| 79 | cg03014680 | 0.6198 | 0.7528 | 0.7121 | 0.7499 | 0.8063 | 0.6415 | 0.6114 | 0.7809 | 0.7291 | 0.7695 | 0.7214 | 0.8043 | 0.6152 | 0.6975 |
| 80 | cg03017475 | 0.6147 | 0.6911 | 0.7558 | 0.7395 | 0.6971 | 0.6008 | 0.5692 | 0.6712 | 0.6799 | 0.7005 | 0.6511 | 0.6899 | 0.6300 | 0.6871 |
| 81 | cg03024246 | 0.7294 | 0.8669 | 0.9077 | 0.8723 | 0.8942 | 0.7533 | 0.7922 | 0.8720 | 0.8606 | 0.8946 | 0.8679 | 0.8696 | 0.8492 | 0.8671 |
| 82 | cg03032025 | 0.7096 | 0.7849 | 0.8377 | 0.8227 | 0.8250 | 0.7448 | 0.7151 | 0.8019 | 0.7877 | 0.8294 | 0.8315 | 0.7687 | 0.7849 | 0.8044 |
| 83 | cg03075662 | 0.6908 | 0.8373 | 0.8664 | 0.8371 | 0.8590 | 0.7271 | 0.7352 | 0.8323 | 0.8248 | 0.8273 | 0.8321 | 0.8135 | 0.8041 | 0.8316 |
| 84 | cg03082060 | 0.5738 | 0.7154 | 0.7009 | 0.7152 | 0.6502 | 0.6421 | 0.5782 | 0.7269 | 0.7306 | 0.6709 | 0.7104 | 0.6132 | 0.6046 | 0.6064 |
| 85 | cg03100040 | 0.2483 | 0.2313 | 0.1494 | 0.2070 | 0.1931 | 0.2794 | 0.2387 | 0.1802 | 0.2124 | 0.1893 | 0.2034 | 0.2204 | 0.1883 | 0.2427 |
| 86 | cg03251655 | 0.3772 | 0.2757 | 0.2339 | 0.3087 | 0.2804 | 0.3791 | 0.2651 | 0.3818 | 0.1337 | 0.1839 | 0.2363 | 0.3929 | 0.2466 | 0.3293 |
| 87 | cg03329572 | 0.7511 | 0.8532 | 0.8794 | 0.8615 | 0.8735 | 0.7594 | 0.7558 | 0.8551 | 0.8446 | 0.8770 | 0.8414 | 0.8262 | 0.8273 | 0.8285 |
| 88 | cg03338064 | 0.6383 | 0.7583 | 0.8107 | 0.7914 | 0.8100 | 0.6495 | 0.6349 | 0.7888 | 0.7550 | 0.7792 | 0.7905 | 0.7583 | 0.7625 | 0.7627 |
| 89 | cg03349251 | 0.6670 | 0.7889 | 0.8232 | 0.8063 | 0.8007 | 0.6590 | 0.6913 | 0.8047 | 0.8004 | 0.8135 | 0.8081 | 0.7855 | 0.7863 | 0.7439 |
| 90 | cg03349935 | 0.9038 | 0.9015 | 0.9007 | 0.8956 | 0.9001 | 0.9112 | 0.8931 | 0.8951 | 0.8995 | 0.9042 | 0.5080 | 0.8915 | 0.9171 | 0.8676 |

|     |            |        |        |        |        |        |        |        |        |        |        |        |        |        |        |
|-----|------------|--------|--------|--------|--------|--------|--------|--------|--------|--------|--------|--------|--------|--------|--------|
| 91  | cg03363283 | 0.5777 | 0.7414 | 0.7889 | 0.7610 | 0.7886 | 0.6194 | 0.5735 | 0.7649 | 0.7272 | 0.7796 | 0.7758 | 0.7973 | 0.7556 | 0.7486 |
| 92  | cg03382346 | 0.7298 | 0.8299 | 0.8558 | 0.8460 | 0.8559 | 0.7536 | 0.7356 | 0.8384 | 0.8289 | 0.8510 | 0.8336 | 0.8040 | 0.8168 | 0.8219 |
| 93  | cg03400060 | 0.5651 | 0.4145 | 0.4296 | 0.5560 | 0.5447 | 0.4199 | 0.5199 | 0.4857 | 0.5662 | 0.5269 | 0.5449 | 0.5495 | 0.6581 | 0.5566 |
| 94  | cg03498559 | 0.5283 | 0.7230 | 0.7671 | 0.7446 | 0.7396 | 0.6008 | 0.5957 | 0.7209 | 0.7094 | 0.7290 | 0.7421 | 0.6974 | 0.7069 | 0.6936 |
| 95  | cg03520136 | 0.7689 | 0.8537 | 0.8611 | 0.8357 | 0.8637 | 0.7754 | 0.7867 | 0.8459 | 0.8364 | 0.8592 | 0.8696 | 0.8392 | 0.8184 | 0.8220 |
| 96  | cg03535648 | 0.5546 | 0.8038 | 0.8865 | 0.8523 | 0.8512 | 0.6350 | 0.6845 | 0.8328 | 0.8201 | 0.8532 | 0.8553 | 0.8304 | 0.7793 | 0.8163 |
| 97  | cg03544379 | 0.7225 | 0.7337 | 0.7675 | 0.7534 | 0.7316 | 0.7131 | 0.6678 | 0.7492 | 0.7383 | 0.7377 | 0.7449 | 0.7637 | 0.7808 | 0.7727 |
| 98  | cg03552103 | 0.2584 | 0.2971 | 0.1898 | 0.2628 | 0.1730 | 0.2178 | 0.2027 | 0.2470 | 0.3375 | 0.2790 | 0.3342 | 0.3365 | 0.2877 | 0.1748 |
| 99  | cg03605761 | 0.7530 | 0.6126 | 0.5846 | 0.7075 | 0.7112 | 0.7103 | 0.6473 | 0.6067 | 0.5805 | 0.7749 | 0.6798 | 0.7573 | 0.7344 | 0.7523 |
| 100 | cg03660451 | 0.7745 | 0.8226 | 0.8315 | 0.8130 | 0.8268 | 0.7669 | 0.7526 | 0.8030 | 0.8098 | 0.8278 | 0.8211 | 0.7881 | 0.7746 | 0.8136 |
| 101 | cg03665785 | 0.6623 | 0.5902 | 0.6717 | 0.6412 | 0.6739 | 0.6314 | 0.6092 | 0.6274 | 0.6678 | 0.7061 | 0.6204 | 0.6389 | 0.6361 | 0.6196 |
| 102 | cg03704393 | 0.9029 | 0.9122 | 0.2395 | 0.8758 | 0.8703 | 0.9268 | 0.8999 | 0.9123 | 0.8753 | 0.9284 | 0.8843 | 0.9227 | 0.9222 | 0.8995 |
| 103 | cg03714397 | 0.6965 | 0.8070 | 0.8539 | 0.8246 | 0.8468 | 0.7450 | 0.7487 | 0.8221 | 0.8267 | 0.8404 | 0.8163 | 0.7972 | 0.7385 | 0.7608 |
| 104 | cg03723845 | 0.7898 | 0.8757 | 0.9013 | 0.8643 | 0.9067 | 0.8254 | 0.8371 | 0.8866 | 0.8576 | 0.8871 | 0.9045 | 0.8604 | 0.8488 | 0.8954 |
| 105 | cg03733371 | 0.6028 | 0.6541 | 0.5818 | 0.7223 | 0.5940 | 0.6158 | 0.5991 | 0.7238 | 0.6865 | 0.6020 | 0.6483 | 0.6475 | 0.6576 | 0.7318 |
| 106 | cg03743584 | 0.3824 | 0.3641 | 0.3100 | 0.3140 | 0.3051 | 0.3253 | 0.3210 | 0.2992 | 0.3469 | 0.3538 | 0.4288 | 0.3167 | 0.2891 | 0.3283 |
| 107 | cg03752087 | 0.8335 | 0.8435 | 0.8942 | 0.8546 | 0.8521 | 0.8201 | 0.7891 | 0.8651 | 0.8681 | 0.8492 | 0.8817 | 0.8228 | 0.7956 | 0.8122 |
| 108 | cg03752885 | 0.7963 | 0.8421 | 0.8718 | 0.8607 | 0.8586 | 0.7553 | 0.7444 | 0.8438 | 0.8278 | 0.8404 | 0.8510 | 0.8423 | 0.8458 | 0.8311 |
| 109 | cg03762535 | 0.6424 | 0.7400 | 0.7930 | 0.7483 | 0.7379 | 0.6385 | 0.6215 | 0.7311 | 0.7342 | 0.7577 | 0.7543 | 0.7098 | 0.6888 | 0.7041 |
| 110 | cg03764585 | 0.4188 | 0.3573 | 0.3533 | 0.3871 | 0.4428 | 0.3056 | 0.4119 | 0.3779 | 0.3839 | 0.4409 | 0.3000 | 0.4790 | 0.4286 | 0.3522 |
| 111 | cg03776060 | 0.1850 | 0.2131 | 0.2717 | 0.2066 | 0.2849 | 0.1967 | 0.2524 | 0.2118 | 0.2003 | 0.3163 | 0.2729 | 0.3181 | 0.2988 | 0.2045 |
| 112 | cg03835158 | 0.7727 | 0.8743 | 0.9157 | 0.9095 | 0.9053 | 0.8163 | 0.8107 | 0.8893 | 0.9021 | 0.8952 | 0.8966 | 0.9008 | 0.8825 | 0.8861 |
| 113 | cg03845435 | 0.7637 | 0.8270 | 0.8333 | 0.8323 | 0.8498 | 0.7658 | 0.7882 | 0.8466 | 0.8384 | 0.8357 | 0.8580 | 0.7956 | 0.7867 | 0.8105 |
| 114 | cg03887787 | 0.5732 | 0.3614 | 0.2550 | 0.4355 | 0.4513 | 0.2696 | 0.2927 | 0.4101 | 0.2535 | 0.4377 | 0.4061 | 0.3353 | 0.5796 | 0.4732 |
| 115 | cg03898365 | 0.6665 | 0.6586 | 0.6694 | 0.6472 | 0.6158 | 0.4544 | 0.5424 | 0.4965 | 0.5732 | 0.5273 | 0.7518 | 0.6436 | 0.6040 | 0.4915 |
| 116 | cg03914452 | 0.6095 | 0.7005 | 0.7851 | 0.7366 | 0.7625 | 0.6173 | 0.5844 | 0.7298 | 0.6618 | 0.7422 | 0.7049 | 0.6789 | 0.6572 | 0.7311 |
| 117 | cg03952109 | 0.5203 | 0.7015 | 0.7755 | 0.7247 | 0.7001 | 0.6188 | 0.6214 | 0.7488 | 0.7151 | 0.7318 | 0.6992 | 0.7175 | 0.6610 | 0.7095 |
| 118 | cg03964111 | 0.2423 | 0.4080 | 0.2000 | 0.3310 | 0.2450 | 0.1588 | 0.2672 | 0.1467 | 0.2373 | 0.1819 | 0.2149 | 0.2739 | 0.2307 | 0.2100 |
| 119 | cg04001802 | 0.7159 | 0.7588 | 0.7862 | 0.7818 | 0.7719 | 0.6955 | 0.6148 | 0.8123 | 0.7344 | 0.7878 | 0.7887 | 0.7122 | 0.7012 | 0.7342 |
| 120 | cg04019407 | 0.7501 | 0.7865 | 0.7404 | 0.7958 | 0.7877 | 0.7940 | 0.7659 | 0.7845 | 0.7049 | 0.7956 | 0.7251 | 0.7334 | 0.7537 | 0.7723 |
| 121 | cg04039225 | 0.6359 | 0.7628 | 0.8226 | 0.7847 | 0.8128 | 0.6502 | 0.6561 | 0.7966 | 0.7506 | 0.8059 | 0.7908 | 0.7655 | 0.7413 | 0.7420 |
| 122 | cg04058169 | 0.6779 | 0.7185 | 0.7367 | 0.7871 | 0.7341 | 0.6138 | 0.7729 | 0.6397 | 0.7472 | 0.7915 | 0.7842 | 0.7158 | 0.7847 | 0.7334 |
| 123 | cg04087608 | 0.7380 | 0.7331 | 0.7778 | 0.8218 | 0.7787 | 0.7294 | 0.7010 | 0.8231 | 0.7752 | 0.7875 | 0.8126 | 0.6721 | 0.7779 | 0.7504 |
| 124 | cg04143809 | 0.6933 | 0.8235 | 0.8762 | 0.8506 | 0.8518 | 0.7265 | 0.7432 | 0.8432 | 0.8482 | 0.8591 | 0.8546 | 0.8420 | 0.8150 | 0.8337 |
| 125 | cg04184278 | 0.6917 | 0.8093 | 0.8581 | 0.8372 | 0.8535 | 0.7200 | 0.7551 | 0.8341 | 0.8178 | 0.8543 | 0.8361 | 0.7907 | 0.7719 | 0.7871 |
| 126 | cg04201526 | 0.6844 | 0.8657 | 0.8962 | 0.8784 | 0.8848 | 0.8142 | 0.7762 | 0.8714 | 0.8796 | 0.9012 | 0.8766 | 0.8945 | 0.8573 | 0.8487 |
| 127 | cg04223956 | 0.7051 | 0.8412 | 0.8901 | 0.8909 | 0.8838 | 0.7302 | 0.7548 | 0.8669 | 0.8825 | 0.8848 | 0.8892 | 0.8465 | 0.8596 | 0.8635 |
| 128 | cg04265576 | 0.1267 | 0.0796 | 0.1372 | 0.1275 | 0.0885 | 0.0543 | 0.0948 | 0.0863 | 0.0852 | 0.0504 | 0.0417 | 0.0871 | 0.0938 | 0.0556 |
| 129 | cg04281204 | 0.5847 | 0.7521 | 0.7683 | 0.7628 | 0.7448 | 0.6370 | 0.6320 | 0.7601 | 0.7161 | 0.7568 | 0.7362 | 0.7198 | 0.6705 | 0.6810 |
| 130 | cg04282622 | 0.5616 | 0.7155 | 0.7431 | 0.7534 | 0.7483 | 0.5974 | 0.5752 | 0.7147 | 0.7119 | 0.7544 | 0.7465 | 0.7348 | 0.6622 | 0.7131 |
| 131 | cg04298323 | 0.6672 | 0.6902 | 0.7561 | 0.7374 | 0.7325 | 0.6530 | 0.5988 | 0.7391 | 0.7230 | 0.7394 | 0.7273 | 0.6959 | 0.6821 | 0.6917 |
| 132 | cg04336379 | 0.2636 | 0.2144 | 0.1875 | 0.1752 | 0.2226 | 0.2122 | 0.2283 | 0.1837 | 0.1997 | 0.2085 | 0.1647 | 0.2473 | 0.2656 | 0.2430 |
| 133 | cg04341806 | 0.6658 | 0.7254 | 0.6962 | 0.7128 | 0.7832 | 0.6854 | 0.6059 | 0.7139 | 0.7241 | 0.6512 | 0.6572 | 0.7253 | 0.6138 | 0.6669 |
| 134 | cg04353483 | 0.7449 | 0.7948 | 0.8234 | 0.8092 | 0.8027 | 0.7199 | 0.6890 | 0.8161 | 0.7958 | 0.8168 | 0.8123 | 0.7878 | 0.7401 | 0.8008 |
| 135 | cg04439215 | 0.6785 | 0.7966 | 0.8443 | 0.8394 | 0.8463 | 0.6952 | 0.7378 | 0.8105 | 0.7966 | 0.8460 | 0.8370 | 0.8316 | 0.7881 | 0.7506 |
| 136 | cg04485603 | 0.7679 | 0.8580 | 0.9022 | 0.8748 | 0.8927 | 0.7979 | 0.8106 | 0.8743 | 0.8711 | 0.8906 | 0.8828 | 0.8837 | 0.8544 | 0.8608 |
| 137 | cg04513422 | 0.1276 | 0.1733 | 0.3906 | 0.1814 | 0.1531 | 0.2372 | 0.2014 | 0.2273 | 0.1494 | 0.1093 | 0.1481 | 0.1447 | 0.4471 | 0.2304 |

|     |            |        |        |        |        |        |        |        |        |        |        |        |        |        |        |
|-----|------------|--------|--------|--------|--------|--------|--------|--------|--------|--------|--------|--------|--------|--------|--------|
| 138 | cg04527989 | 0.6333 | 0.6771 | 0.7126 | 0.7345 | 0.6575 | 0.6796 | 0.6238 | 0.7330 | 0.6846 | 0.6815 | 0.7184 | 0.6824 | 0.6531 | 0.6740 |
| 139 | cg04545516 | 0.6242 | 0.6872 | 0.7177 | 0.7178 | 0.7419 | 0.6764 | 0.5937 | 0.7253 | 0.6984 | 0.7326 | 0.6635 | 0.7294 | 0.6291 | 0.7169 |
| 140 | cg04570669 | 0.5133 | 0.6748 | 0.7432 | 0.7145 | 0.7043 | 0.5221 | 0.5319 | 0.6867 | 0.6964 | 0.7313 | 0.7313 | 0.7100 | 0.6658 | 0.6930 |
| 141 | cg04616566 | 0.7796 | 0.8529 | 0.8743 | 0.8739 | 0.8776 | 0.8262 | 0.8081 | 0.8759 | 0.8523 | 0.8615 | 0.8203 | 0.8467 | 0.8609 | 0.5873 |
| 142 | cg04645174 | 0.7264 | 0.8356 | 0.8534 | 0.8475 | 0.8311 | 0.7549 | 0.7268 | 0.8377 | 0.8151 | 0.8311 | 0.8406 | 0.7962 | 0.8214 | 0.8245 |
| 143 | cg04705866 | 0.7146 | 0.7991 | 0.7974 | 0.7914 | 0.7847 | 0.7524 | 0.6964 | 0.7930 | 0.7644 | 0.7884 | 0.7747 | 0.7421 | 0.7568 | 0.7851 |
| 144 | cg04739570 | 0.3190 | 0.1971 | 0.1584 | 0.1929 | 0.2037 | 0.3846 | 0.2219 | 0.2295 | 0.2072 | 0.2053 | 0.3118 | 0.2436 | 0.2416 | 0.1891 |
| 145 | cg04748010 | 0.7545 | 0.5107 | 0.8820 | 0.8788 | 0.8764 | 0.7783 | 0.7972 | 0.8626 | 0.8551 | 0.8927 | 0.8608 | 0.8584 | 0.8403 | 0.8385 |
| 146 | cg04762213 | 0.0702 | 0.0910 | 0.0713 | 0.0775 | 0.0671 | 0.0632 | 0.0748 | 0.0714 | 0.0765 | 0.0766 | 0.0945 | 0.0974 | 0.0738 | 0.1164 |
| 147 | cg04794887 | 0.0470 | 0.0702 | 0.0468 | 0.1500 | 0.0716 | 0.1163 | 0.0665 | 0.1942 | 0.1874 | 0.0808 | 0.0567 | 0.0668 | 0.0666 | 0.0476 |
| 148 | cg04891836 | 0.4293 | 0.4461 | 0.5207 | 0.4666 | 0.4673 | 0.4920 | 0.3133 | 0.5368 | 0.5032 | 0.4519 | 0.4454 | 0.4225 | 0.3895 | 0.5033 |
| 149 | cg04902405 | 0.7602 | 0.8497 | 0.8722 | 0.8437 | 0.8571 | 0.7491 | 0.6943 | 0.8640 | 0.8366 | 0.8438 | 0.8487 | 0.8449 | 0.7952 | 0.8129 |
| 150 | cg04979933 | 0.7154 | 0.8680 | 0.8786 | 0.8722 | 0.8657 | 0.7853 | 0.7531 | 0.8603 | 0.8389 | 0.8679 | 0.8749 | 0.8555 | 0.8219 | 0.8368 |
| 151 | cg04987894 | 0.3263 | 0.2789 | 0.1654 | 0.4379 | 0.2224 | 0.1321 | 0.2618 | 0.1834 | 0.4204 | 0.1435 | 0.1393 | 0.2729 | 0.1118 | 0.3642 |
| 152 | cg05088386 | 0.6765 | 0.8279 | 0.8758 | 0.8380 | 0.8657 | 0.7206 | 0.7184 | 0.8102 | 0.8225 | 0.8507 | 0.8301 | 0.8265 | 0.7925 | 0.8028 |
| 153 | cg05126264 | 0.7697 | 0.8860 | 0.8989 | 0.8956 | 0.8870 | 0.8258 | 0.8246 | 0.8729 | 0.8658 | 0.8969 | 0.8921 | 0.8948 | 0.8791 | 0.8839 |
| 154 | cg05193832 | 0.7087 | 0.8020 | 0.8782 | 0.8434 | 0.8668 | 0.7058 | 0.7245 | 0.8322 | 0.8310 | 0.8385 | 0.8237 | 0.7997 | 0.7779 | 0.8197 |
| 155 | cg05333568 | 0.4340 | 0.1225 | 0.3757 | 0.3043 | 0.3358 | 0.3728 | 0.3384 | 0.2921 | 0.4275 | 0.5117 | 0.4545 | 0.3358 | 0.3332 | 0.2018 |
| 156 | cg05341115 | 0.6629 | 0.7373 | 0.7875 | 0.7700 | 0.7794 | 0.7034 | 0.6735 | 0.7420 | 0.7592 | 0.7641 | 0.7695 | 0.7634 | 0.7035 | 0.6920 |
| 157 | cg05343453 | 0.7717 | 0.8424 | 0.8618 | 0.8463 | 0.8551 | 0.7665 | 0.7391 | 0.8508 | 0.8238 | 0.8601 | 0.8466 | 0.8441 | 0.7978 | 0.8496 |
| 158 | cg05348123 | 0.6902 | 0.8323 | 0.8330 | 0.8103 | 0.8550 | 0.7860 | 0.7203 | 0.8214 | 0.7958 | 0.8464 | 0.8496 | 0.8320 | 0.7581 | 0.7585 |
| 159 | cg05376954 | 0.5976 | 0.6611 | 0.6513 | 0.6986 | 0.6486 | 0.6066 | 0.5564 | 0.6430 | 0.6200 | 0.6658 | 0.6609 | 0.6154 | 0.5615 | 0.5881 |
| 160 | cg05379350 | 0.2682 | 0.2272 | 0.2161 | 0.2220 | 0.2376 | 0.2026 | 0.2526 | 0.1981 | 0.2303 | 0.2288 | 0.2132 | 0.1752 | 0.2374 | 0.2173 |
| 161 | cg05389024 | 0.5644 | 0.7001 | 0.7440 | 0.7492 | 0.7360 | 0.6409 | 0.5717 | 0.7416 | 0.6812 | 0.7506 | 0.7376 | 0.7252 | 0.6811 | 0.7039 |
| 162 | cg05412531 | 0.7968 | 0.8477 | 0.8567 | 0.8631 | 0.8710 | 0.7786 | 0.8024 | 0.8499 | 0.8576 | 0.8674 | 0.8664 | 0.8468 | 0.8499 | 0.8206 |
| 163 | cg05511685 | 0.7011 | 0.7832 | 0.8337 | 0.8275 | 0.8160 | 0.7445 | 0.7151 | 0.7934 | 0.7816 | 0.7918 | 0.8022 | 0.7716 | 0.8022 | 0.7586 |
| 164 | cg05520656 | 0.2372 | 0.2434 | 0.0633 | 0.0673 | 0.0750 | 0.0725 | 0.0679 | 0.0970 | 0.0729 | 0.0657 | 0.4607 | 0.0719 | 0.0770 | 0.0722 |
| 165 | cg05564266 | 0.7331 | 0.8006 | 0.7558 | 0.8334 | 0.8321 | 0.7457 | 0.7850 | 0.8412 | 0.8268 | 0.8480 | 0.7869 | 0.7970 | 0.8033 | 0.7949 |
| 166 | cg05585544 | 0.7922 | 0.7936 | 0.8263 | 0.8362 | 0.8360 | 0.7862 | 0.7800 | 0.8298 | 0.8090 | 0.8358 | 0.8188 | 0.7981 | 0.7829 | 0.7923 |
| 167 | cg05592434 | 0.2235 | 0.2771 | 0.3446 | 0.3120 | 0.3170 | 0.2262 | 0.2100 | 0.3153 | 0.2787 | 0.3195 | 0.3032 | 0.2876 | 0.3020 | 0.3014 |
| 168 | cg05624196 | 0.6512 | 0.7823 | 0.8223 | 0.8108 | 0.8188 | 0.6935 | 0.6709 | 0.8034 | 0.7735 | 0.8166 | 0.7877 | 0.7783 | 0.7531 | 0.7865 |
| 169 | cg05696092 | 0.5301 | 0.5348 | 0.4359 | 0.4693 | 0.6029 | 0.4240 | 0.5588 | 0.5836 | 0.5557 | 0.5692 | 0.5460 | 0.5637 | 0.6366 | 0.6590 |
| 170 | cg05721199 | 0.5272 | 0.6908 | 0.7392 | 0.7258 | 0.6908 | 0.5677 | 0.5846 | 0.7008 | 0.6839 | 0.7400 | 0.7406 | 0.6801 | 0.6570 | 0.6525 |
| 171 | cg05744229 | 0.6837 | 0.7583 | 0.7718 | 0.7481 | 0.7488 | 0.6616 | 0.6881 | 0.7487 | 0.7371 | 0.7561 | 0.7641 | 0.7011 | 0.7316 | 0.6840 |
| 172 | cg05755779 | 0.7041 | 0.8269 | 0.7599 | 0.8321 | 0.8411 | 0.7265 | 0.7248 | 0.7818 | 0.8080 | 0.8519 | 0.8273 | 0.7792 | 0.8281 | 0.8197 |
| 173 | cg05761971 | 0.6349 | 0.7734 | 0.8057 | 0.7705 | 0.7609 | 0.6639 | 0.6733 | 0.7748 | 0.7453 | 0.7917 | 0.7683 | 0.7455 | 0.6949 | 0.7353 |
| 174 | cg05779068 | 0.6733 | 0.7919 | 0.8131 | 0.8144 | 0.8096 | 0.7024 | 0.6672 | 0.8208 | 0.7779 | 0.8256 | 0.8186 | 0.8030 | 0.7916 | 0.7890 |
| 175 | cg05822532 | 0.4934 | 0.3936 | 0.4277 | 0.4868 | 0.4889 | 0.4263 | 0.4794 | 0.1871 | 0.2611 | 0.5173 | 0.3642 | 0.5974 | 0.5412 | 0.4447 |
| 176 | cg05824215 | 0.6902 | 0.6971 | 0.6928 | 0.6885 | 0.6753 | 0.7209 | 0.5400 | 0.7532 | 0.7100 | 0.7074 | 0.7148 | 0.6884 | 0.6338 | 0.7177 |
| 177 | cg05863612 | 0.7792 | 0.8298 | 0.8655 | 0.8371 | 0.8457 | 0.6955 | 0.7199 | 0.8168 | 0.8314 | 0.8469 | 0.8650 | 0.8206 | 0.8131 | 0.8074 |
| 178 | cg05936800 | 0.5965 | 0.7187 | 0.8244 | 0.7984 | 0.7946 | 0.5667 | 0.6667 | 0.7974 | 0.7894 | 0.7966 | 0.7834 | 0.7596 | 0.7169 | 0.7414 |
| 179 | cg05960024 | 0.7873 | 0.8755 | 0.9013 | 0.8841 | 0.8987 | 0.8044 | 0.8214 | 0.8758 | 0.8785 | 0.8959 | 0.8918 | 0.8892 | 0.8655 | 0.8706 |
| 180 | cg05965188 | 0.7730 | 0.7868 | 0.7782 | 0.7984 | 0.7913 | 0.7212 | 0.6938 | 0.7700 | 0.7752 | 0.7720 | 0.7787 | 0.7841 | 0.7711 | 0.7914 |
| 181 | cg05968233 | 0.3726 | 0.1752 | 0.1545 | 0.2724 | 0.3817 | 0.2125 | 0.2381 | 0.2590 | 0.3178 | 0.2924 | 0.1851 | 0.2664 | 0.2560 | 0.2486 |
| 182 | cg05998244 | 0.6149 | 0.7785 | 0.8084 | 0.7918 | 0.7832 | 0.6677 | 0.6031 | 0.7756 | 0.8009 | 0.7739 | 0.7972 | 0.7648 | 0.7463 | 0.7718 |
| 183 | cg05998983 | 0.6554 | 0.7856 | 0.7934 | 0.8040 | 0.8123 | 0.7110 | 0.7107 | 0.8068 | 0.7555 | 0.8169 | 0.7935 | 0.7966 | 0.7236 | 0.7731 |
| 184 | cg06021171 | 0.4488 | 0.6339 | 0.6807 | 0.6812 | 0.6995 | 0.5373 | 0.5386 | 0.6235 | 0.6425 | 0.7033 | 0.6793 | 0.7058 | 0.6518 | 0.6543 |



|     |            |        |        |        |        |        |        |        |        |        |        |        |        |        |        |
|-----|------------|--------|--------|--------|--------|--------|--------|--------|--------|--------|--------|--------|--------|--------|--------|
| 185 | cg06098051 | 0.6905 | 0.8203 | 0.8433 | 0.8241 | 0.8205 | 0.7265 | 0.7283 | 0.8261 | 0.7907 | 0.8169 | 0.8284 | 0.8217 | 0.7850 | 0.8209 |
| 186 | cg06140118 | 0.0551 | 0.0311 | 0.0372 | 0.0503 | 0.0323 | 0.0204 | 0.0294 | 0.1256 | 0.1109 | 0.0471 | 0.0332 | 0.0562 | 0.0192 | 0.0522 |
| 187 | cg06210526 | 0.8567 | 0.8874 | 0.9063 | 0.5197 | 0.9096 | 0.8903 | 0.8653 | 0.9074 | 0.8953 | 0.9085 | 0.8950 | 0.8821 | 0.8905 | 0.5307 |
| 188 | cg06213598 | 0.6244 | 0.7395 | 0.8002 | 0.7752 | 0.7559 | 0.6295 | 0.6218 | 0.7761 | 0.7649 | 0.7676 | 0.7951 | 0.7652 | 0.7527 | 0.7726 |
| 189 | cg06233985 | 0.6470 | 0.7451 | 0.7993 | 0.7641 | 0.7785 | 0.6527 | 0.6618 | 0.7661 | 0.7412 | 0.7835 | 0.7893 | 0.7127 | 0.7070 | 0.7898 |
| 190 | cg06244634 | 0.6822 | 0.7454 | 0.8237 | 0.8082 | 0.7938 | 0.6774 | 0.6812 | 0.7755 | 0.7558 | 0.8025 | 0.8060 | 0.7895 | 0.7533 | 0.7750 |
| 191 | cg06268694 | 0.1882 | 0.1329 | 0.0889 | 0.1029 | 0.1729 | 0.0533 | 0.1876 | 0.0989 | 0.1178 | 0.1005 | 0.0956 | 0.1770 | 0.1176 | 0.1024 |
| 192 | cg06290168 | 0.0256 | 0.0955 | 0.0594 | 0.1283 | 0.0632 | 0.0411 | 0.0435 | 0.1080 | 0.0730 | 0.1457 | 0.0399 | 0.1080 | 0.0388 | 0.1048 |
| 193 | cg06353345 | 0.6528 | 0.7635 | 0.7704 | 0.8004 | 0.7986 | 0.6833 | 0.6549 | 0.7711 | 0.7767 | 0.7883 | 0.7987 | 0.6928 | 0.7451 | 0.7156 |
| 194 | cg06399881 | 0.5671 | 0.7484 | 0.8256 | 0.8107 | 0.8062 | 0.6659 | 0.6105 | 0.7703 | 0.7547 | 0.8014 | 0.7689 | 0.7579 | 0.7388 | 0.7658 |
| 195 | cg06425515 | 0.5006 | 0.6858 | 0.7258 | 0.7204 | 0.7190 | 0.5649 | 0.5813 | 0.7031 | 0.6665 | 0.7108 | 0.7296 | 0.6772 | 0.6706 | 0.6479 |
| 196 | cg06479216 | 0.5287 | 0.7110 | 0.7506 | 0.7492 | 0.7365 | 0.6095 | 0.5949 | 0.7229 | 0.7199 | 0.7446 | 0.6942 | 0.7035 | 0.6453 | 0.6736 |
| 197 | cg06488505 | 0.6051 | 0.7872 | 0.8406 | 0.8151 | 0.8063 | 0.6777 | 0.6627 | 0.8244 | 0.7961 | 0.8193 | 0.8090 | 0.7984 | 0.7779 | 0.7997 |
| 198 | cg06496654 | 0.6029 | 0.7691 | 0.8107 | 0.7973 | 0.8015 | 0.6489 | 0.6330 | 0.7830 | 0.7466 | 0.7885 | 0.7779 | 0.7806 | 0.7304 | 0.7671 |
| 199 | cg06545504 | 0.6823 | 0.7895 | 0.8456 | 0.8324 | 0.8412 | 0.7396 | 0.7276 | 0.8150 | 0.8374 | 0.8374 | 0.8249 | 0.8080 | 0.7822 | 0.8032 |
| 200 | cg06585893 | 0.2196 | 0.5316 | 0.5257 | 0.5599 | 0.5457 | 0.5458 | 0.5571 | 0.6186 | 0.4919 | 0.5242 | 0.4822 | 0.4835 | 0.6008 | 0.5847 |
| 201 | cg06638451 | 0.7222 | 0.6117 | 0.6870 | 0.6998 | 0.7339 | 0.7468 | 0.7157 | 0.7175 | 0.6980 | 0.7075 | 0.6411 | 0.7100 | 0.6672 | 0.6373 |
| 202 | cg06643227 | 0.8165 | 0.8396 | 0.8367 | 0.8387 | 0.8519 | 0.8261 | 0.7964 | 0.8164 | 0.8489 | 0.8507 | 0.8300 | 0.8355 | 0.8454 | 0.8595 |
| 203 | cg06730286 | 0.8201 | 0.8643 | 0.8954 | 0.8821 | 0.8714 | 0.7690 | 0.7597 | 0.8595 | 0.8462 | 0.8707 | 0.8685 | 0.8363 | 0.7896 | 0.8605 |
| 204 | cg06750167 | 0.4219 | 0.3834 | 0.3637 | 0.4547 | 0.5343 | 0.3592 | 0.5253 | 0.4526 | 0.4245 | 0.5627 | 0.4759 | 0.4894 | 0.5098 | 0.5444 |
| 205 | cg06757810 | 0.6975 | 0.8131 | 0.8538 | 0.8411 | 0.8606 | 0.7249 | 0.7101 | 0.8456 | 0.8465 | 0.8339 | 0.8372 | 0.8304 | 0.7791 | 0.7781 |
| 206 | cg06790275 | 0.0406 | 0.0445 | 0.1363 | 0.0572 | 0.0813 | 0.0499 | 0.0527 | 0.1992 | 0.1077 | 0.0501 | 0.0667 | 0.0552 | 0.0409 | 0.0707 |
| 207 | cg06798189 | 0.5028 | 0.7047 | 0.8057 | 0.7464 | 0.7774 | 0.5308 | 0.5771 | 0.7664 | 0.7270 | 0.7780 | 0.7313 | 0.7386 | 0.7245 | 0.7054 |
| 208 | cg06840801 | 0.7868 | 0.8301 | 0.8368 | 0.8462 | 0.8369 | 0.8029 | 0.7468 | 0.8345 | 0.8498 | 0.8467 | 0.8357 | 0.7774 | 0.7912 | 0.7886 |
| 209 | cg06908474 | 0.0704 | 0.1295 | 0.1124 | 0.1621 | 0.0562 | 0.0392 | 0.0303 | 0.1210 | 0.0583 | 0.1960 | 0.2011 | 0.0259 | 0.1324 | 0.0265 |
| 210 | cg06933072 | 0.7879 | 0.8721 | 0.8783 | 0.8598 | 0.8875 | 0.7968 | 0.7939 | 0.8658 | 0.8714 | 0.8815 | 0.8627 | 0.8632 | 0.8245 | 0.8337 |
| 211 | cg07039113 | 0.8623 | 0.8752 | 0.8619 | 0.8961 | 0.8597 | 0.8793 | 0.8230 | 0.8659 | 0.8453 | 0.8709 | 0.8710 | 0.8019 | 0.8618 | 0.4653 |
| 212 | cg07044282 | 0.5377 | 0.6945 | 0.7081 | 0.7128 | 0.7553 | 0.6434 | 0.6300 | 0.7329 | 0.7209 | 0.7517 | 0.7132 | 0.7194 | 0.6923 | 0.7571 |
| 213 | cg07103493 | 0.0490 | 0.0821 | 0.0632 | 0.0823 | 0.0733 | 0.0397 | 0.1211 | 0.0828 | 0.0870 | 0.0715 | 0.0696 | 0.0886 | 0.0904 | 0.0887 |
| 214 | cg07136161 | 0.5419 | 0.7554 | 0.8190 | 0.8014 | 0.7795 | 0.6432 | 0.6284 | 0.7716 | 0.7808 | 0.7972 | 0.7769 | 0.7695 | 0.7674 | 0.7736 |
| 215 | cg07136254 | 0.7199 | 0.7796 | 0.8179 | 0.8250 | 0.8334 | 0.7184 | 0.7135 | 0.8308 | 0.7977 | 0.8196 | 0.8149 | 0.7858 | 0.7459 | 0.7791 |
| 216 | cg07153965 | 0.7146 | 0.7743 | 0.8073 | 0.7802 | 0.8125 | 0.7020 | 0.6051 | 0.7785 | 0.7829 | 0.7980 | 0.7863 | 0.7970 | 0.7977 | 0.8255 |
| 217 | cg07204803 | 0.6271 | 0.7437 | 0.8141 | 0.7917 | 0.7563 | 0.6061 | 0.5943 | 0.7345 | 0.7473 | 0.7778 | 0.7625 | 0.7555 | 0.7346 | 0.7638 |
| 218 | cg07232688 | 0.6058 | 0.7377 | 0.8144 | 0.7960 | 0.7902 | 0.6878 | 0.6237 | 0.7776 | 0.7728 | 0.7663 | 0.7763 | 0.7544 | 0.7465 | 0.7361 |
| 219 | cg07236769 | 0.5840 | 0.7259 | 0.7552 | 0.7715 | 0.7751 | 0.6225 | 0.6568 | 0.7651 | 0.7305 | 0.7717 | 0.7598 | 0.7848 | 0.7467 | 0.7193 |
| 220 | cg07292816 | 0.7277 | 0.7732 | 0.8519 | 0.8125 | 0.8206 | 0.7179 | 0.6758 | 0.8115 | 0.8030 | 0.8390 | 0.8293 | 0.8071 | 0.7605 | 0.7831 |
| 221 | cg07327347 | 0.8042 | 0.8333 | 0.8038 | 0.8345 | 0.7936 | 0.4180 | 0.7634 | 0.8395 | 0.8172 | 0.4452 | 0.8139 | 0.3747 | 0.7937 | 0.8133 |
| 222 | cg07338205 | 0.7195 | 0.8106 | 0.8376 | 0.8279 | 0.8322 | 0.6967 | 0.7151 | 0.8175 | 0.7995 | 0.8232 | 0.8123 | 0.8152 | 0.7725 | 0.7853 |
| 223 | cg07363637 | 0.6439 | 0.6714 | 0.6076 | 0.7333 | 0.7533 | 0.5356 | 0.7347 | 0.6741 | 0.6063 | 0.6254 | 0.6711 | 0.7632 | 0.5880 | 0.6160 |
| 224 | cg07366967 | 0.7496 | 0.8289 | 0.8243 | 0.8090 | 0.8352 | 0.7579 | 0.7372 | 0.8086 | 0.8280 | 0.8298 | 0.8278 | 0.8220 | 0.7751 | 0.8084 |
| 225 | cg07403350 | 0.5187 | 0.6492 | 0.3098 | 0.4274 | 0.5969 | 0.3901 | 0.4081 | 0.4538 | 0.6487 | 0.6605 | 0.4891 | 0.6381 | 0.6412 | 0.4252 |
| 226 | cg07455279 | 0.4071 | 0.2991 | 0.1575 | 0.4349 | 0.2432 | 0.3227 | 0.2003 | 0.2406 | 0.3864 | 0.2537 | 0.5343 | 0.2559 | 0.2728 | 0.2574 |
| 227 | cg07459489 | 0.7137 | 0.8237 | 0.8817 | 0.8658 | 0.8552 | 0.7527 | 0.7312 | 0.8566 | 0.8288 | 0.8651 | 0.8671 | 0.8574 | 0.8203 | 0.8490 |
| 228 | cg07465609 | 0.6009 | 0.7970 | 0.8369 | 0.8210 | 0.8163 | 0.6640 | 0.6448 | 0.7945 | 0.7933 | 0.8461 | 0.8032 | 0.7642 | 0.7374 | 0.7637 |
| 229 | cg07472159 | 0.5933 | 0.6739 | 0.7927 | 0.7418 | 0.7546 | 0.6294 | 0.5940 | 0.7330 | 0.7378 | 0.7365 | 0.7536 | 0.7219 | 0.6761 | 0.7071 |
| 230 | cg07476030 | 0.7231 | 0.7970 | 0.8013 | 0.8163 | 0.8087 | 0.7475 | 0.7685 | 0.7984 | 0.7858 | 0.8123 | 0.8020 | 0.7860 | 0.7460 | 0.7503 |
| 231 | cg07504718 | 0.6772 | 0.7155 | 0.7378 | 0.7148 | 0.7723 | 0.6453 | 0.6117 | 0.7165 | 0.7184 | 0.7435 | 0.7412 | 0.6916 | 0.6594 | 0.6784 |

|     |            |        |        |        |        |        |        |        |        |        |        |        |        |        |        |
|-----|------------|--------|--------|--------|--------|--------|--------|--------|--------|--------|--------|--------|--------|--------|--------|
| 232 | cg07543883 | 0.5505 | 0.5571 | 0.6172 | 0.5730 | 0.4816 | 0.5669 | 0.4677 | 0.5407 | 0.5570 | 0.5753 | 0.5451 | 0.3469 | 0.4890 | 0.5752 |
| 233 | cg07613278 | 0.3809 | 0.2959 | 0.1764 | 0.1923 | 0.2317 | 0.4209 | 0.3606 | 0.2101 | 0.2745 | 0.2146 | 0.2606 | 0.2870 | 0.2926 | 0.2339 |
| 234 | cg07689731 | 0.5600 | 0.6812 | 0.7231 | 0.6898 | 0.7369 | 0.5761 | 0.5911 | 0.6866 | 0.6615 | 0.7310 | 0.6821 | 0.7250 | 0.6625 | 0.6594 |
| 235 | cg07732644 | 0.6247 | 0.7371 | 0.8076 | 0.7921 | 0.8163 | 0.6655 | 0.6416 | 0.7770 | 0.7637 | 0.8038 | 0.7398 | 0.7794 | 0.7614 | 0.7825 |
| 236 | cg07747299 | 0.1569 | 0.0885 | 0.0649 | 0.1426 | 0.1748 | 0.1112 | 0.1422 | 0.0935 | 0.1040 | 0.2860 | 0.4113 | 0.2011 | 0.3183 | 0.1768 |
| 237 | cg07789904 | 0.0418 | 0.0455 | 0.0386 | 0.0428 | 0.0423 | 0.0494 | 0.0436 | 0.0391 | 0.0437 | 0.0371 | 0.0485 | 0.0402 | 0.0547 | 0.0461 |
| 238 | cg07803864 | 0.5246 | 0.7416 | 0.8134 | 0.7553 | 0.7795 | 0.5936 | 0.5967 | 0.7210 | 0.7566 | 0.7758 | 0.7574 | 0.6835 | 0.6604 | 0.7145 |
| 239 | cg07829809 | 0.5211 | 0.7298 | 0.7917 | 0.7490 | 0.7864 | 0.5706 | 0.5865 | 0.7552 | 0.7753 | 0.7810 | 0.7467 | 0.7476 | 0.6808 | 0.7421 |
| 240 | cg07880854 | 0.4467 | 0.3863 | 0.4109 | 0.4455 | 0.5469 | 0.3665 | 0.5088 | 0.4503 | 0.4456 | 0.5351 | 0.5174 | 0.5251 | 0.5010 | 0.4948 |
| 241 | cg07942995 | 0.6459 | 0.6918 | 0.7958 | 0.7721 | 0.7608 | 0.5838 | 0.5624 | 0.7008 | 0.7245 | 0.7369 | 0.7503 | 0.7031 | 0.6491 | 0.7135 |
| 242 | cg07950803 | 0.7784 | 0.8218 | 0.7939 | 0.7501 | 0.7889 | 0.8357 | 0.7719 | 0.8224 | 0.7371 | 0.8115 | 0.7374 | 0.7587 | 0.6993 | 0.8097 |
| 243 | cg07974891 | 0.6283 | 0.7107 | 0.7287 | 0.7487 | 0.7611 | 0.6098 | 0.6263 | 0.7395 | 0.6955 | 0.7307 | 0.7244 | 0.7331 | 0.6529 | 0.7358 |
| 244 | cg07981495 | 0.7333 | 0.8539 | 0.8813 | 0.8576 | 0.8618 | 0.7811 | 0.7478 | 0.8525 | 0.8353 | 0.8605 | 0.8566 | 0.8496 | 0.8083 | 0.8561 |
| 245 | cg07991621 | 0.3244 | 0.2220 | 0.2280 | 0.2013 | 0.1463 | 0.2894 | 0.1939 | 0.1998 | 0.2219 | 0.1439 | 0.2315 | 0.1544 | 0.3147 | 0.2526 |
| 246 | cg08046471 | 0.6878 | 0.7950 | 0.8226 | 0.8011 | 0.8249 | 0.7056 | 0.7358 | 0.8136 | 0.8127 | 0.8277 | 0.8138 | 0.8341 | 0.7981 | 0.8146 |
| 247 | cg08067268 | 0.2335 | 0.2712 | 0.1494 | 0.2052 | 0.1732 | 0.2421 | 0.2639 | 0.2025 | 0.2121 | 0.2714 | 0.2245 | 0.1841 | 0.2006 | 0.1705 |
| 248 | cg08088390 | 0.6563 | 0.7087 | 0.6747 | 0.6389 | 0.7026 | 0.6523 | 0.6569 | 0.6422 | 0.6558 | 0.7473 | 0.6196 | 0.5838 | 0.5724 | 0.6921 |
| 249 | cg08096038 | 0.6667 | 0.7988 | 0.8736 | 0.8501 | 0.8472 | 0.6975 | 0.7352 | 0.8208 | 0.8223 | 0.8676 | 0.8365 | 0.8517 | 0.8102 | 0.8045 |
| 250 | cg08099701 | 0.6607 | 0.8110 | 0.8304 | 0.8318 | 0.8381 | 0.7220 | 0.6625 | 0.8212 | 0.8114 | 0.8325 | 0.8366 | 0.8255 | 0.7606 | 0.7617 |
| 251 | cg08113203 | 0.6110 | 0.7718 | 0.7587 | 0.7796 | 0.8060 | 0.6871 | 0.6556 | 0.7731 | 0.7477 | 0.8018 | 0.7919 | 0.8202 | 0.7641 | 0.7721 |
| 252 | cg08212685 | 0.1441 | 0.1700 | 0.3362 | 0.1057 | 0.1103 | 0.1614 | 0.1395 | 0.1584 | 0.3507 | 0.1084 | 0.3324 | 0.1441 | 0.1185 | 0.1519 |
| 253 | cg08284151 | 0.4290 | 0.4825 | 0.5265 | 0.5298 | 0.6046 | 0.4250 | 0.4097 | 0.5063 | 0.5074 | 0.5259 | 0.5847 | 0.5181 | 0.5473 | 0.5114 |
| 254 | cg08375941 | 0.5565 | 0.7405 | 0.7694 | 0.7389 | 0.7478 | 0.6060 | 0.6154 | 0.7340 | 0.6952 | 0.7452 | 0.7647 | 0.7494 | 0.7057 | 0.7034 |
| 255 | cg08403419 | 0.7476 | 0.7180 | 0.7034 | 0.7302 | 0.7744 | 0.6654 | 0.7279 | 0.7219 | 0.7077 | 0.7119 | 0.6947 | 0.7328 | 0.7180 | 0.6788 |
| 256 | cg08404225 | 0.5890 | 0.7598 | 0.6472 | 0.7246 | 0.7729 | 0.6796 | 0.6178 | 0.7708 | 0.7282 | 0.7504 | 0.7133 | 0.7227 | 0.6284 | 0.7288 |
| 257 | cg08409225 | 0.4223 | 0.2658 | 0.2724 | 0.3539 | 0.3666 | 0.2840 | 0.3587 | 0.4278 | 0.4053 | 0.3743 | 0.3518 | 0.4019 | 0.3047 | 0.4204 |
| 258 | cg08465774 | 0.5931 | 0.7060 | 0.7475 | 0.7588 | 0.7490 | 0.6102 | 0.5758 | 0.7540 | 0.7077 | 0.7537 | 0.7233 | 0.7296 | 0.7129 | 0.7786 |
| 259 | cg08471713 | 0.5534 | 0.4270 | 0.4565 | 0.4706 | 0.5246 | 0.5477 | 0.7833 | 0.5241 | 0.5617 | 0.8887 | 0.5476 | 0.7997 | 0.8002 | 0.5543 |
| 260 | cg08489623 | 0.6584 | 0.6096 | 0.6688 | 0.7024 | 0.7220 | 0.5846 | 0.5668 | 0.7193 | 0.7173 | 0.7310 | 0.7128 | 0.6826 | 0.6650 | 0.6664 |
| 261 | cg08507270 | 0.6736 | 0.8099 | 0.8434 | 0.8106 | 0.8249 | 0.7326 | 0.7093 | 0.8014 | 0.8110 | 0.8475 | 0.8152 | 0.7930 | 0.7467 | 0.7991 |
| 262 | cg08550724 | 0.6889 | 0.8504 | 0.8816 | 0.8744 | 0.8812 | 0.7651 | 0.7480 | 0.8647 | 0.8494 | 0.8718 | 0.8573 | 0.8718 | 0.8389 | 0.8519 |
| 263 | cg08578023 | 0.2537 | 0.1923 | 0.1055 | 0.1429 | 0.1701 | 0.2430 | 0.2688 | 0.1433 | 0.1736 | 0.1479 | 0.1487 | 0.1834 | 0.2369 | 0.1761 |
| 264 | cg08585897 | 0.3433 | 0.4137 | 0.4742 | 0.4146 | 0.4250 | 0.3359 | 0.2694 | 0.4346 | 0.3893 | 0.4142 | 0.4392 | 0.4513 | 0.4562 | 0.4661 |
| 265 | cg08624068 | 0.7684 | 0.8521 | 0.8855 | 0.8792 | 0.8841 | 0.7777 | 0.8082 | 0.8423 | 0.8456 | 0.8743 | 0.8670 | 0.8579 | 0.8316 | 0.8461 |
| 266 | cg08631437 | 0.1339 | 0.2784 | 0.3188 | 0.2768 | 0.2786 | 0.1428 | 0.1292 | 0.2703 | 0.2464 | 0.2444 | 0.2534 | 0.2707 | 0.2266 | 0.2396 |
| 267 | cg08632701 | 0.8571 | 0.8117 | 0.7860 | 0.8953 | 0.8217 | 0.8198 | 0.7707 | 0.7978 | 0.8329 | 0.8161 | 0.8788 | 0.8807 | 0.7634 | 0.8851 |
| 268 | cg08634464 | 0.3295 | 0.2635 | 0.0734 | 0.3132 | 0.2547 | 0.2907 | 0.2451 | 0.2808 | 0.2859 | 0.2386 | 0.2685 | 0.0815 | 0.3167 | 0.1173 |
| 269 | cg08654334 | 0.3975 | 0.5865 | 0.6917 | 0.6387 | 0.6217 | 0.5072 | 0.4599 | 0.5970 | 0.6047 | 0.6552 | 0.6169 | 0.5792 | 0.5547 | 0.6067 |
| 270 | cg08697242 | 0.7939 | 0.8240 | 0.8579 | 0.8299 | 0.8345 | 0.7473 | 0.7308 | 0.8237 | 0.8161 | 0.8507 | 0.8264 | 0.8078 | 0.8359 | 0.8351 |
| 271 | cg08728865 | 0.9015 | 0.9207 | 0.9224 | 0.9121 | 0.9152 | 0.9087 | 0.8863 | 0.9177 | 0.9178 | 0.9203 | 0.9136 | 0.9277 | 0.5899 | 0.9073 |
| 272 | cg08752459 | 0.3559 | 0.2288 | 0.1630 | 0.1878 | 0.2090 | 0.3262 | 0.3161 | 0.2256 | 0.2331 | 0.1951 | 0.2259 | 0.1986 | 0.2891 | 0.2638 |
| 273 | cg08822227 | 0.3068 | 0.1894 | 0.1307 | 0.1229 | 0.0833 | 0.1588 | 0.1892 | 0.1180 | 0.2278 | 0.0692 | 0.1101 | 0.0749 | 0.2658 | 0.1196 |
| 274 | cg08832227 | 0.3501 | 0.3084 | 0.1043 | 0.2058 | 0.3853 | 0.2253 | 0.2269 | 0.1869 | 0.3819 | 0.3318 | 0.3670 | 0.2897 | 0.3160 | 0.2021 |
| 275 | cg08923109 | 0.7407 | 0.8729 | 0.8897 | 0.8826 | 0.8946 | 0.8006 | 0.7949 | 0.8750 | 0.8658 | 0.8874 | 0.8761 | 0.8630 | 0.8450 | 0.8735 |
| 276 | cg08983760 | 0.7362 | 0.6921 | 0.7331 | 0.7642 | 0.7334 | 0.6493 | 0.6609 | 0.7091 | 0.7376 | 0.7512 | 0.7449 | 0.7406 | 0.7450 | 0.7428 |
| 277 | cg09034896 | 0.3622 | 0.7193 | 0.7408 | 0.7661 | 0.7971 | 0.7806 | 0.7448 | 0.7545 | 0.7858 | 0.7512 | 0.7402 | 0.8108 | 0.7939 | 0.7970 |
| 278 | cg09058542 | 0.6590 | 0.8296 | 0.8823 | 0.8635 | 0.8753 | 0.7073 | 0.7357 | 0.8453 | 0.8391 | 0.8577 | 0.8588 | 0.8244 | 0.7745 | 0.8133 |

|     |            |        |        |        |        |        |        |        |        |        |        |        |        |        |        |
|-----|------------|--------|--------|--------|--------|--------|--------|--------|--------|--------|--------|--------|--------|--------|--------|
| 279 | cg09060914 | 0.7149 | 0.8347 | 0.8452 | 0.8220 | 0.8217 | 0.7402 | 0.7100 | 0.8226 | 0.7923 | 0.8444 | 0.8197 | 0.8406 | 0.8026 | 0.7606 |
| 280 | cg09087901 | 0.5919 | 0.6822 | 0.6717 | 0.7326 | 0.7205 | 0.6142 | 0.5893 | 0.6804 | 0.6734 | 0.6936 | 0.6893 | 0.6690 | 0.6502 | 0.6098 |
| 281 | cg09088193 | 0.7721 | 0.8592 | 0.8973 | 0.8564 | 0.8805 | 0.7599 | 0.7608 | 0.8628 | 0.8498 | 0.8952 | 0.8661 | 0.8419 | 0.8263 | 0.8461 |
| 282 | cg09096031 | 0.5047 | 0.5775 | 0.5889 | 0.6274 | 0.6730 | 0.5200 | 0.6757 | 0.6088 | 0.4805 | 0.5334 | 0.5270 | 0.5642 | 0.6054 | 0.5227 |
| 283 | cg09096383 | 0.5026 | 0.7023 | 0.7966 | 0.7689 | 0.7592 | 0.5993 | 0.6605 | 0.7299 | 0.7635 | 0.7818 | 0.7736 | 0.7317 | 0.6887 | 0.7097 |
| 284 | cg09111484 | 0.6070 | 0.7833 | 0.7884 | 0.7888 | 0.7927 | 0.6947 | 0.7033 | 0.7882 | 0.7994 | 0.7995 | 0.7784 | 0.7784 | 0.7468 | 0.7397 |
| 285 | cg09238677 | 0.3138 | 0.2006 | 0.1433 | 0.1642 | 0.1801 | 0.2871 | 0.2675 | 0.1632 | 0.1771 | 0.1526 | 0.1638 | 0.1564 | 0.2317 | 0.2122 |
| 286 | cg09262269 | 0.1238 | 0.0588 | 0.0728 | 0.1349 | 0.0997 | 0.0594 | 0.1129 | 0.1138 | 0.1179 | 0.0602 | 0.1267 | 0.0653 | 0.1074 | 0.0612 |
| 287 | cg09272256 | 0.6036 | 0.8245 | 0.8516 | 0.8464 | 0.8456 | 0.6888 | 0.6615 | 0.8352 | 0.7680 | 0.8552 | 0.8287 | 0.8049 | 0.7858 | 0.7958 |
| 288 | cg09277575 | 0.6079 | 0.7419 | 0.7479 | 0.7168 | 0.7096 | 0.6446 | 0.6453 | 0.7385 | 0.7105 | 0.7667 | 0.7175 | 0.6911 | 0.6912 | 0.7208 |
| 289 | cg09321965 | 0.6349 | 0.7681 | 0.8582 | 0.8414 | 0.8269 | 0.6349 | 0.6541 | 0.8171 | 0.7905 | 0.8501 | 0.8263 | 0.8064 | 0.7431 | 0.7880 |
| 290 | cg09360083 | 0.5600 | 0.6809 | 0.7561 | 0.7035 | 0.7447 | 0.5869 | 0.4896 | 0.7208 | 0.6735 | 0.7104 | 0.6989 | 0.7449 | 0.6510 | 0.6730 |
| 291 | cg09375488 | 0.6203 | 0.7026 | 0.7537 | 0.7346 | 0.7380 | 0.5671 | 0.5808 | 0.7176 | 0.7064 | 0.7675 | 0.7651 | 0.7360 | 0.6585 | 0.7044 |
| 292 | cg09377486 | 0.7498 | 0.8442 | 0.8764 | 0.8192 | 0.8727 | 0.6942 | 0.7209 | 0.8021 | 0.7999 | 0.8706 | 0.8250 | 0.7123 | 0.8171 | 0.7972 |
| 293 | cg09440243 | 0.6618 | 0.8149 | 0.8327 | 0.8098 | 0.8339 | 0.7180 | 0.7356 | 0.8145 | 0.8046 | 0.8158 | 0.7920 | 0.8196 | 0.7774 | 0.7825 |
| 294 | cg09448875 | 0.7613 | 0.8575 | 0.8829 | 0.8497 | 0.8615 | 0.7799 | 0.7416 | 0.8556 | 0.8465 | 0.8622 | 0.8702 | 0.8412 | 0.8383 | 0.8514 |
| 295 | cg09478478 | 0.6758 | 0.7624 | 0.8345 | 0.8051 | 0.7889 | 0.6526 | 0.6583 | 0.7992 | 0.7429 | 0.7953 | 0.7957 | 0.7791 | 0.7409 | 0.7183 |
| 296 | cg09494546 | 0.7165 | 0.8110 | 0.8680 | 0.8421 | 0.8439 | 0.6838 | 0.6942 | 0.8025 | 0.8309 | 0.8478 | 0.8382 | 0.8368 | 0.7793 | 0.7970 |
| 297 | cg09526693 | 0.6466 | 0.7876 | 0.8265 | 0.8140 | 0.8065 | 0.7138 | 0.6625 | 0.8105 | 0.7952 | 0.8257 | 0.7888 | 0.7506 | 0.7431 | 0.7813 |
| 298 | cg09532664 | 0.7315 | 0.8506 | 0.8648 | 0.8554 | 0.8486 | 0.7753 | 0.6199 | 0.8541 | 0.8387 | 0.7792 | 0.8393 | 0.7648 | 0.8178 | 0.8291 |
| 299 | cg09559551 | 0.6297 | 0.7520 | 0.8267 | 0.7879 | 0.8058 | 0.6846 | 0.6641 | 0.7627 | 0.7734 | 0.8022 | 0.7865 | 0.7676 | 0.7331 | 0.7388 |
| 300 | cg09656934 | 0.3681 | 0.2198 | 0.2988 | 0.2744 | 0.3472 | 0.3321 | 0.2833 | 0.3434 | 0.3723 | 0.3189 | 0.3817 | 0.3810 | 0.4379 | 0.4179 |
| 301 | cg09745307 | 0.5686 | 0.6898 | 0.7400 | 0.6927 | 0.6887 | 0.6210 | 0.5731 | 0.7013 | 0.7109 | 0.6989 | 0.6571 | 0.5804 | 0.5747 | 0.6509 |
| 302 | cg09748960 | 0.6662 | 0.7778 | 0.8383 | 0.7901 | 0.7722 | 0.6866 | 0.6624 | 0.8030 | 0.7580 | 0.8010 | 0.8194 | 0.7066 | 0.7066 | 0.7005 |
| 303 | cg09784259 | 0.6581 | 0.7850 | 0.8262 | 0.8109 | 0.8188 | 0.6147 | 0.6684 | 0.7934 | 0.7711 | 0.8192 | 0.7965 | 0.7927 | 0.7562 | 0.7793 |
| 304 | cg09816180 | 0.6833 | 0.8055 | 0.8466 | 0.8378 | 0.8140 | 0.7564 | 0.7258 | 0.8156 | 0.8198 | 0.8363 | 0.8355 | 0.8242 | 0.7860 | 0.8115 |
| 305 | cg09830278 | 0.6582 | 0.7780 | 0.8402 | 0.7895 | 0.8096 | 0.6242 | 0.6514 | 0.8014 | 0.7890 | 0.8388 | 0.8050 | 0.7829 | 0.7470 | 0.7851 |
| 306 | cg09845785 | 0.2020 | 0.0960 | 0.0669 | 0.0975 | 0.0938 | 0.1871 | 0.1721 | 0.0901 | 0.1022 | 0.0865 | 0.0900 | 0.0888 | 0.0944 | 0.1292 |
| 307 | cg09873510 | 0.6699 | 0.7741 | 0.7933 | 0.8022 | 0.7629 | 0.6685 | 0.6193 | 0.7597 | 0.8029 | 0.7566 | 0.7889 | 0.7086 | 0.7425 | 0.7806 |
| 308 | cg09898548 | 0.7271 | 0.7744 | 0.8377 | 0.8020 | 0.8123 | 0.6651 | 0.6882 | 0.7765 | 0.7641 | 0.8182 | 0.7978 | 0.7919 | 0.7626 | 0.7875 |
| 309 | cg09944526 | 0.7596 | 0.8691 | 0.8946 | 0.8719 | 0.8655 | 0.7678 | 0.7547 | 0.8779 | 0.8437 | 0.8650 | 0.8711 | 0.8425 | 0.8071 | 0.8236 |
| 310 | cg09958090 | 0.0391 | 0.0430 | 0.0371 | 0.0428 | 0.0384 | 0.0432 | 0.0401 | 0.0388 | 0.0381 | 0.0345 | 0.0368 | 0.0497 | 0.0491 | 0.0511 |
| 311 | cg10087081 | 0.6638 | 0.7495 | 0.7377 | 0.7325 | 0.7836 | 0.6734 | 0.6302 | 0.3263 | 0.7306 | 0.7585 | 0.7190 | 0.7429 | 0.7214 | 0.7405 |
| 312 | cg10094277 | 0.5433 | 0.7764 | 0.7752 | 0.7835 | 0.7835 | 0.6355 | 0.6178 | 0.7767 | 0.7162 | 0.7911 | 0.7897 | 0.7612 | 0.7217 | 0.7152 |
| 313 | cg10100220 | 0.7445 | 0.8317 | 0.8647 | 0.8566 | 0.8669 | 0.7625 | 0.7358 | 0.8463 | 0.8523 | 0.8675 | 0.8372 | 0.8512 | 0.8124 | 0.8333 |
| 314 | cg10130071 | 0.7615 | 0.8651 | 0.9016 | 0.8815 | 0.8878 | 0.8029 | 0.7968 | 0.8575 | 0.8571 | 0.8868 | 0.8841 | 0.8787 | 0.8593 | 0.8571 |
| 315 | cg10198837 | 0.8410 | 0.9126 | 0.8436 | 0.9238 | 0.9281 | 0.8928 | 0.8908 | 0.9194 | 0.9093 | 0.9269 | 0.9217 | 0.8873 | 0.9097 | 0.9116 |
| 316 | cg10237469 | 0.2004 | 0.1616 | 0.1611 | 0.1480 | 0.1638 | 0.1637 | 0.1769 | 0.1623 | 0.1799 | 0.1780 | 0.1639 | 0.1756 | 0.3313 | 0.1507 |
| 317 | cg10238171 | 0.6105 | 0.6927 | 0.7143 | 0.7033 | 0.7396 | 0.5999 | 0.5836 | 0.6864 | 0.6782 | 0.7445 | 0.7269 | 0.6815 | 0.6394 | 0.6884 |
| 318 | cg10241097 | 0.7854 | 0.8333 | 0.8480 | 0.8550 | 0.8548 | 0.8261 | 0.7801 | 0.8413 | 0.8458 | 0.8441 | 0.8210 | 0.8383 | 0.4294 | 0.8086 |
| 319 | cg10281770 | 0.5869 | 0.5156 | 0.6207 | 0.6246 | 0.7440 | 0.5452 | 0.7260 | 0.5256 | 0.5485 | 0.6409 | 0.6320 | 0.6226 | 0.6155 | 0.5608 |
| 320 | cg10296238 | 0.3443 | 0.2256 | 0.1790 | 0.2901 | 0.2168 | 0.2573 | 0.2788 | 0.2539 | 0.1836 | 0.4066 | 0.6497 | 0.3705 | 0.4193 | 0.3030 |
| 321 | cg10362475 | 0.3499 | 0.2122 | 0.2762 | 0.2803 | 0.2418 | 0.2502 | 0.2914 | 0.2515 | 0.2648 | 0.3514 | 0.2981 | 0.2807 | 0.2922 | 0.2908 |
| 322 | cg10371914 | 0.5293 | 0.6734 | 0.7376 | 0.6830 | 0.7101 | 0.5382 | 0.5269 | 0.6867 | 0.6314 | 0.6862 | 0.6807 | 0.6536 | 0.6121 | 0.6629 |
| 323 | cg10401088 | 0.4779 | 0.5277 | 0.5844 | 0.6051 | 0.5278 | 0.4742 | 0.4571 | 0.5370 | 0.5328 | 0.5164 | 0.5006 | 0.4722 | 0.4604 | 0.5074 |
| 324 | cg10409680 | 0.0366 | 0.0615 | 0.0467 | 0.0980 | 0.0494 | 0.0341 | 0.0416 | 0.1492 | 0.0456 | 0.0352 | 0.0337 | 0.0470 | 0.0587 | 0.0605 |
| 325 | cg10431340 | 0.6195 | 0.7023 | 0.7004 | 0.7543 | 0.7538 | 0.7151 | 0.5776 | 0.7393 | 0.6639 | 0.7397 | 0.6729 | 0.7040 | 0.6694 | 0.7267 |

|     |            |        |        |        |        |        |        |        |        |        |        |        |        |        |        |
|-----|------------|--------|--------|--------|--------|--------|--------|--------|--------|--------|--------|--------|--------|--------|--------|
| 326 | cg10501629 | 0.7395 | 0.8392 | 0.8813 | 0.8684 | 0.8564 | 0.7643 | 0.7457 | 0.8454 | 0.8497 | 0.8551 | 0.8679 | 0.8514 | 0.8442 | 0.8317 |
| 327 | cg10569616 | 0.4948 | 0.7833 | 0.8325 | 0.8191 | 0.8299 | 0.6338 | 0.6245 | 0.7648 | 0.7878 | 0.7862 | 0.8055 | 0.7747 | 0.7431 | 0.7692 |
| 328 | cg10576828 | 0.6862 | 0.8264 | 0.8452 | 0.8364 | 0.8486 | 0.7490 | 0.7274 | 0.8101 | 0.8212 | 0.8439 | 0.8504 | 0.8038 | 0.8349 | 0.8391 |
| 329 | cg10585462 | 0.5694 | 0.7318 | 0.8218 | 0.7342 | 0.7805 | 0.5708 | 0.6177 | 0.7474 | 0.7189 | 0.7495 | 0.7174 | 0.7407 | 0.7192 | 0.7351 |
| 330 | cg10620457 | 0.7425 | 0.7785 | 0.7878 | 0.8121 | 0.8140 | 0.7606 | 0.7115 | 0.8215 | 0.7739 | 0.8133 | 0.8178 | 0.7322 | 0.7295 | 0.7391 |
| 331 | cg10648908 | 0.1544 | 0.1342 | 0.0754 | 0.1153 | 0.0595 | 0.0598 | 0.0608 | 0.1860 | 0.1856 | 0.1154 | 0.0877 | 0.0693 | 0.0704 | 0.1026 |
| 332 | cg10671066 | 0.2498 | 0.1653 | 0.1026 | 0.1562 | 0.1132 | 0.1982 | 0.1901 | 0.1559 | 0.1574 | 0.1340 | 0.1462 | 0.1068 | 0.1434 | 0.1185 |
| 333 | cg10707565 | 0.7361 | 0.7788 | 0.8505 | 0.8346 | 0.8324 | 0.6873 | 0.6917 | 0.8138 | 0.7866 | 0.8107 | 0.8163 | 0.7908 | 0.7872 | 0.7728 |
| 334 | cg10715231 | 0.9147 | 0.9247 | 0.8410 | 0.9233 | 0.9216 | 0.9156 | 0.8671 | 0.9106 | 0.8540 | 0.8529 | 0.9194 | 0.9161 | 0.9232 | 0.9002 |
| 335 | cg10732834 | 0.7120 | 0.7891 | 0.8240 | 0.8007 | 0.8208 | 0.6977 | 0.7120 | 0.8002 | 0.7831 | 0.8180 | 0.8036 | 0.8038 | 0.7718 | 0.7798 |
| 336 | cg10746737 | 0.8192 | 0.8675 | 0.7819 | 0.7553 | 0.7711 | 0.7896 | 0.7583 | 0.8693 | 0.7224 | 0.8825 | 0.7273 | 0.7987 | 0.8577 | 0.8055 |
| 337 | cg10753073 | 0.7847 | 0.8666 | 0.8379 | 0.8895 | 0.9057 | 0.8132 | 0.8144 | 0.8917 | 0.8835 | 0.8907 | 0.8456 | 0.8234 | 0.8612 | 0.8335 |
| 338 | cg10756887 | 0.0736 | 0.0652 | 0.0601 | 0.0792 | 0.0789 | 0.0521 | 0.0897 | 0.0601 | 0.0762 | 0.2145 | 0.0895 | 0.1051 | 0.1249 | 0.0763 |
| 339 | cg10771262 | 0.2437 | 0.2291 | 0.2576 | 0.2719 | 0.2686 | 0.2570 | 0.2515 | 0.2940 | 0.2591 | 0.2455 | 0.2940 | 0.2760 | 0.2836 | 0.2823 |
| 340 | cg10835876 | 0.7141 | 0.8104 | 0.8240 | 0.8185 | 0.8339 | 0.6862 | 0.6978 | 0.8200 | 0.8012 | 0.8185 | 0.8068 | 0.8023 | 0.7652 | 0.7793 |
| 341 | cg10846410 | 0.6112 | 0.7172 | 0.7939 | 0.7368 | 0.7850 | 0.6268 | 0.6367 | 0.7443 | 0.7220 | 0.7615 | 0.7448 | 0.7430 | 0.7145 | 0.7126 |
| 342 | cg10851775 | 0.6091 | 0.7410 | 0.8173 | 0.7659 | 0.7701 | 0.6059 | 0.5770 | 0.7611 | 0.7409 | 0.7795 | 0.7681 | 0.7347 | 0.7310 | 0.7235 |
| 343 | cg10874403 | 0.5380 | 0.7372 | 0.7788 | 0.7559 | 0.7568 | 0.5924 | 0.5856 | 0.7335 | 0.7450 | 0.7669 | 0.7224 | 0.7166 | 0.7075 | 0.7421 |
| 344 | cg10878998 | 0.1431 | 0.1956 | 0.2393 | 0.2226 | 0.2091 | 0.1557 | 0.1409 | 0.2160 | 0.2026 | 0.2130 | 0.1933 | 0.2101 | 0.2063 | 0.2042 |
| 345 | cg10920765 | 0.6099 | 0.6991 | 0.7519 | 0.7486 | 0.7421 | 0.5959 | 0.5869 | 0.7195 | 0.7119 | 0.7476 | 0.7195 | 0.7276 | 0.6722 | 0.6716 |
| 346 | cg10978346 | 0.4977 | 0.6264 | 0.7317 | 0.7143 | 0.7316 | 0.5096 | 0.5470 | 0.6747 | 0.6452 | 0.6813 | 0.6623 | 0.6371 | 0.6338 | 0.6318 |
| 347 | cg10985320 | 0.7198 | 0.8801 | 0.9008 | 0.8831 | 0.8897 | 0.7886 | 0.7752 | 0.8770 | 0.8824 | 0.8879 | 0.8779 | 0.8786 | 0.8698 | 0.8476 |
| 348 | cg10997248 | 0.6159 | 0.6318 | 0.6425 | 0.4883 | 0.6733 | 0.5173 | 0.5053 | 0.6616 | 0.6288 | 0.6085 | 0.5855 | 0.5835 | 0.6312 | 0.5698 |
| 349 | cg11059341 | 0.6349 | 0.7918 | 0.8181 | 0.7878 | 0.8215 | 0.7046 | 0.6822 | 0.7930 | 0.8046 | 0.8204 | 0.8091 | 0.7682 | 0.7521 | 0.7931 |
| 350 | cg11074362 | 0.5700 | 0.7060 | 0.7605 | 0.7313 | 0.7400 | 0.6114 | 0.6250 | 0.7203 | 0.7266 | 0.7400 | 0.7369 | 0.7116 | 0.6770 | 0.7301 |
| 351 | cg11077161 | 0.6234 | 0.7314 | 0.8064 | 0.7746 | 0.7935 | 0.6426 | 0.5783 | 0.7538 | 0.7583 | 0.7781 | 0.7681 | 0.7282 | 0.6896 | 0.7066 |
| 352 | cg11108890 | 0.3213 | 0.1489 | 0.0810 | 0.2163 | 0.1580 | 0.1123 | 0.1672 | 0.1099 | 0.2003 | 0.1810 | 0.2996 | 0.2482 | 0.2357 | 0.1677 |
| 353 | cg11119884 | 0.5650 | 0.7002 | 0.7437 | 0.6921 | 0.7245 | 0.5529 | 0.5592 | 0.6917 | 0.6916 | 0.7195 | 0.6947 | 0.6802 | 0.6801 | 0.6938 |
| 354 | cg11126313 | 0.6873 | 0.8078 | 0.8371 | 0.8210 | 0.8243 | 0.7518 | 0.7106 | 0.8227 | 0.7991 | 0.8231 | 0.8266 | 0.8192 | 0.7643 | 0.8214 |
| 355 | cg11152574 | 0.7597 | 0.8074 | 0.8440 | 0.8414 | 0.8259 | 0.7438 | 0.7058 | 0.8426 | 0.8076 | 0.8439 | 0.8483 | 0.8162 | 0.7537 | 0.7361 |
| 356 | cg11166999 | 0.6721 | 0.7807 | 0.8294 | 0.8139 | 0.8253 | 0.6904 | 0.6870 | 0.7945 | 0.7979 | 0.8328 | 0.8122 | 0.8112 | 0.7847 | 0.7744 |
| 357 | cg11178136 | 0.8002 | 0.8345 | 0.8588 | 0.8614 | 0.8666 | 0.7644 | 0.7553 | 0.8315 | 0.8286 | 0.8564 | 0.8603 | 0.8532 | 0.8046 | 0.8258 |
| 358 | cg11207564 | 0.1886 | 0.1918 | 0.2179 | 0.2216 | 0.1806 | 0.1985 | 0.1978 | 0.2038 | 0.2018 | 0.2125 | 0.2009 | 0.2148 | 0.1983 | 0.2577 |
| 359 | cg11231018 | 0.6589 | 0.8084 | 0.8951 | 0.8546 | 0.8563 | 0.7471 | 0.7355 | 0.8610 | 0.8388 | 0.8648 | 0.8617 | 0.8603 | 0.8067 | 0.8313 |
| 360 | cg11235426 | 0.4454 | 0.5631 | 0.0465 | 0.4128 | 0.5703 | 0.2757 | 0.4050 | 0.3755 | 0.4899 | 0.0495 | 0.5212 | 0.4668 | 0.4708 | 0.4327 |
| 361 | cg11237738 | 0.7056 | 0.7478 | 0.8377 | 0.8053 | 0.8116 | 0.6877 | 0.6181 | 0.7856 | 0.7492 | 0.7990 | 0.7988 | 0.8408 | 0.7842 | 0.8036 |
| 362 | cg11251498 | 0.4352 | 0.4533 | 0.5188 | 0.5080 | 0.5166 | 0.4274 | 0.3821 | 0.5549 | 0.4346 | 0.4874 | 0.4595 | 0.4457 | 0.4320 | 0.5240 |
| 363 | cg11295113 | 0.6790 | 0.7603 | 0.8207 | 0.7990 | 0.7974 | 0.6879 | 0.6694 | 0.7887 | 0.7506 | 0.8181 | 0.7743 | 0.7572 | 0.7551 | 0.7663 |
| 364 | cg11308639 | 0.6583 | 0.7397 | 0.8128 | 0.8132 | 0.8023 | 0.6531 | 0.6197 | 0.8260 | 0.7724 | 0.7927 | 0.7978 | 0.7688 | 0.7395 | 0.7659 |
| 365 | cg11376198 | 0.2181 | 0.0713 | 0.3040 | 0.3420 | 0.3274 | 0.0477 | 0.0962 | 0.0637 | 0.4254 | 0.3219 | 0.3221 | 0.2026 | 0.4236 | 0.1636 |
| 366 | cg11378052 | 0.6867 | 0.7534 | 0.7388 | 0.8009 | 0.7305 | 0.7078 | 0.6778 | 0.7862 | 0.7659 | 0.7110 | 0.7640 | 0.7354 | 0.7174 | 0.7649 |
| 367 | cg11386709 | 0.7384 | 0.8241 | 0.8865 | 0.8596 | 0.8502 | 0.7179 | 0.6925 | 0.8452 | 0.8260 | 0.8529 | 0.8495 | 0.8316 | 0.7759 | 0.7981 |
| 368 | cg11391732 | 0.8241 | 0.8743 | 0.8977 | 0.8774 | 0.8864 | 0.8025 | 0.8285 | 0.8724 | 0.8765 | 0.8879 | 0.9022 | 0.8735 | 0.8600 | 0.8560 |
| 369 | cg11479877 | 0.7206 | 0.8139 | 0.8226 | 0.8037 | 0.8002 | 0.6899 | 0.7218 | 0.8063 | 0.7765 | 0.8010 | 0.8110 | 0.7968 | 0.7343 | 0.7740 |
| 370 | cg11504646 | 0.7388 | 0.8235 | 0.8385 | 0.8355 | 0.8435 | 0.7586 | 0.7228 | 0.8123 | 0.8187 | 0.8332 | 0.8359 | 0.8069 | 0.7920 | 0.8102 |
| 371 | cg11554605 | 0.7745 | 0.8721 | 0.8985 | 0.8702 | 0.9042 | 0.7976 | 0.7814 | 0.8953 | 0.8683 | 0.8927 | 0.8833 | 0.8483 | 0.8484 | 0.8524 |
| 372 | cg11649846 | 0.6724 | 0.8264 | 0.8586 | 0.8333 | 0.8416 | 0.7347 | 0.7025 | 0.8339 | 0.8028 | 0.8532 | 0.8475 | 0.8305 | 0.7684 | 0.7962 |

|     |            |        |        |        |        |        |        |        |        |        |        |        |        |        |        |
|-----|------------|--------|--------|--------|--------|--------|--------|--------|--------|--------|--------|--------|--------|--------|--------|
| 373 | cg11680741 | 0.5094 | 0.6292 | 0.6745 | 0.6596 | 0.6728 | 0.5120 | 0.4825 | 0.6288 | 0.6453 | 0.6533 | 0.6593 | 0.5923 | 0.6359 | 0.6340 |
| 374 | cg11698653 | 0.5729 | 0.6590 | 0.7292 | 0.6923 | 0.6866 | 0.6198 | 0.5522 | 0.6774 | 0.6639 | 0.6858 | 0.7229 | 0.7092 | 0.6919 | 0.6808 |
| 375 | cg11726593 | 0.3059 | 0.3136 | 0.2848 | 0.3155 | 0.2858 | 0.2147 | 0.3104 | 0.2609 | 0.2869 | 0.3053 | 0.2565 | 0.3418 | 0.3123 | 0.3023 |
| 376 | cg11793332 | 0.2162 | 0.1358 | 0.0779 | 0.1020 | 0.1275 | 0.2541 | 0.1869 | 0.1358 | 0.1542 | 0.1147 | 0.1407 | 0.1161 | 0.1745 | 0.1491 |
| 377 | cg11799561 | 0.5517 | 0.7399 | 0.7883 | 0.7632 | 0.7550 | 0.6264 | 0.6057 | 0.7374 | 0.7372 | 0.7446 | 0.7297 | 0.7353 | 0.7220 | 0.7169 |
| 378 | cg11879188 | 0.8080 | 0.8641 | 0.8004 | 0.8081 | 0.9084 | 0.7623 | 0.8811 | 0.9285 | 0.8208 | 0.8898 | 0.8543 | 0.8209 | 0.8439 | 0.8845 |
| 379 | cg11884699 | 0.6412 | 0.8194 | 0.7855 | 0.7821 | 0.7960 | 0.6364 | 0.6760 | 0.7698 | 0.7783 | 0.8320 | 0.8312 | 0.7739 | 0.7737 | 0.7214 |
| 380 | cg12010995 | 0.4872 | 0.6648 | 0.7575 | 0.6815 | 0.7065 | 0.6251 | 0.5556 | 0.6859 | 0.6692 | 0.7243 | 0.7089 | 0.6833 | 0.6805 | 0.6566 |
| 381 | cg12014368 | 0.5748 | 0.7047 | 0.7584 | 0.6850 | 0.7249 | 0.5969 | 0.5311 | 0.6611 | 0.6818 | 0.7012 | 0.7004 | 0.6347 | 0.6672 | 0.6655 |
| 382 | cg12024906 | 0.1571 | 0.3277 | 0.1509 | 0.3529 | 0.1319 | 0.1242 | 0.2245 | 0.4670 | 0.4129 | 0.2058 | 0.1828 | 0.2586 | 0.2783 | 0.1196 |
| 383 | cg12032049 | 0.7483 | 0.8223 | 0.8105 | 0.8266 | 0.8259 | 0.7339 | 0.7026 | 0.8007 | 0.7921 | 0.8343 | 0.8092 | 0.8066 | 0.7948 | 0.7817 |
| 384 | cg12044689 | 0.8668 | 0.9139 | 0.9322 | 0.9277 | 0.9283 | 0.8567 | 0.8335 | 0.9124 | 0.9210 | 0.9159 | 0.9046 | 0.9257 | 0.8899 | 0.9019 |
| 385 | cg12058490 | 0.6184 | 0.8015 | 0.8489 | 0.8083 | 0.8185 | 0.6622 | 0.6783 | 0.8084 | 0.8037 | 0.8322 | 0.8172 | 0.7959 | 0.7413 | 0.7757 |
| 386 | cg12064929 | 0.6353 | 0.7660 | 0.7991 | 0.7694 | 0.7904 | 0.7145 | 0.5948 | 0.7620 | 0.7277 | 0.7826 | 0.7598 | 0.7263 | 0.6827 | 0.7507 |
| 387 | cg12067287 | 0.7916 | 0.8763 | 0.8913 | 0.8800 | 0.8976 | 0.8217 | 0.8191 | 0.8794 | 0.8773 | 0.8929 | 0.8921 | 0.8706 | 0.8558 | 0.8582 |
| 388 | cg12095491 | 0.7521 | 0.8257 | 0.8662 | 0.8695 | 0.8817 | 0.7501 | 0.6750 | 0.8480 | 0.8303 | 0.8424 | 0.8498 | 0.8293 | 0.8180 | 0.8236 |
| 389 | cg12108912 | 0.7314 | 0.7953 | 0.8381 | 0.7772 | 0.6707 | 0.7114 | 0.6498 | 0.7886 | 0.7982 | 0.7654 | 0.7877 | 0.7374 | 0.7209 | 0.7643 |
| 390 | cg12128839 | 0.6674 | 0.6358 | 0.7640 | 0.6853 | 0.6656 | 0.5918 | 0.6939 | 0.6715 | 0.6042 | 0.5714 | 0.3441 | 0.6091 | 0.5951 | 0.6066 |
| 391 | cg12182525 | 0.7803 | 0.8716 | 0.8709 | 0.8838 | 0.8821 | 0.7961 | 0.7673 | 0.8773 | 0.8649 | 0.8813 | 0.8728 | 0.8559 | 0.8477 | 0.8560 |
| 392 | cg12218747 | 0.8047 | 0.6710 | 0.6874 | 0.7948 | 0.7015 | 0.7094 | 0.6501 | 0.6872 | 0.7492 | 0.7139 | 0.7845 | 0.8179 | 0.6901 | 0.8349 |
| 393 | cg12255284 | 0.5802 | 0.6776 | 0.7817 | 0.7273 | 0.7475 | 0.5373 | 0.6017 | 0.7107 | 0.6758 | 0.7335 | 0.7069 | 0.6701 | 0.7028 | 0.6431 |
| 394 | cg12274567 | 0.7838 | 0.8308 | 0.8980 | 0.8745 | 0.8615 | 0.7617 | 0.7697 | 0.8619 | 0.8342 | 0.8706 | 0.8716 | 0.8356 | 0.8510 | 0.8513 |
| 395 | cg12286890 | 0.7784 | 0.7894 | 0.8585 | 0.8716 | 0.8560 | 0.7331 | 0.3563 | 0.8703 | 0.8195 | 0.8375 | 0.8441 | 0.7936 | 0.8012 | 0.8257 |
| 396 | cg12331980 | 0.6533 | 0.7448 | 0.8426 | 0.8199 | 0.7890 | 0.6752 | 0.6864 | 0.7756 | 0.7816 | 0.8111 | 0.8099 | 0.7878 | 0.7602 | 0.7459 |
| 397 | cg12348970 | 0.7868 | 0.8660 | 0.8866 | 0.8777 | 0.8888 | 0.7984 | 0.7913 | 0.8629 | 0.8648 | 0.8928 | 0.8924 | 0.8604 | 0.8610 | 0.8642 |
| 398 | cg12368241 | 0.6661 | 0.8177 | 0.8608 | 0.8367 | 0.8516 | 0.7056 | 0.7270 | 0.8426 | 0.8282 | 0.8401 | 0.8309 | 0.8007 | 0.7996 | 0.8186 |
| 399 | cg12380854 | 0.6930 | 0.6952 | 0.7323 | 0.7737 | 0.7223 | 0.7171 | 0.6226 | 0.7319 | 0.7168 | 0.7277 | 0.7374 | 0.6715 | 0.7089 | 0.7207 |
| 400 | cg12387247 | 0.5642 | 0.6295 | 0.5970 | 0.5527 | 0.6485 | 0.5804 | 0.5753 | 0.5825 | 0.5821 | 0.6431 | 0.6007 | 0.6175 | 0.6528 | 0.6496 |
| 401 | cg12397274 | 0.6388 | 0.7277 | 0.7337 | 0.7918 | 0.7796 | 0.7030 | 0.6628 | 0.7547 | 0.7385 | 0.7625 | 0.7538 | 0.7586 | 0.6832 | 0.7251 |
| 402 | cg12428447 | 0.7378 | 0.7341 | 0.8144 | 0.7953 | 0.7745 | 0.7151 | 0.6373 | 0.7953 | 0.7767 | 0.8018 | 0.8006 | 0.8060 | 0.7276 | 0.7808 |
| 403 | cg12437481 | 0.7799 | 0.2861 | 0.8140 | 0.8677 | 0.7119 | 0.5195 | 0.8143 | 0.6033 | 0.7709 | 0.7109 | 0.4824 | 0.5217 | 0.3834 | 0.3495 |
| 404 | cg12491710 | 0.8868 | 0.8974 | 0.9289 | 0.9250 | 0.9349 | 0.9072 | 0.7771 | 0.9161 | 0.8996 | 0.8989 | 0.9282 | 0.8942 | 0.8553 | 0.9172 |
| 405 | cg12542281 | 0.1615 | 0.1087 | 0.0881 | 0.1085 | 0.0928 | 0.1607 | 0.1680 | 0.1053 | 0.1177 | 0.0898 | 0.1011 | 0.0715 | 0.1109 | 0.1285 |
| 406 | cg12610070 | 0.2088 | 0.1777 | 0.2139 | 0.2176 | 0.2523 | 0.1871 | 0.2916 | 0.2329 | 0.1937 | 0.2538 | 0.2622 | 0.2722 | 0.2682 | 0.2202 |
| 407 | cg12611860 | 0.6282 | 0.7289 | 0.8143 | 0.7862 | 0.7806 | 0.6732 | 0.6188 | 0.7534 | 0.7375 | 0.7751 | 0.7349 | 0.6903 | 0.7218 | 0.7419 |
| 408 | cg12626411 | 0.4800 | 0.6702 | 0.7253 | 0.7016 | 0.7137 | 0.4742 | 0.5225 | 0.6998 | 0.6787 | 0.7222 | 0.6967 | 0.6702 | 0.6478 | 0.7098 |
| 409 | cg12647320 | 0.7695 | 0.8305 | 0.8791 | 0.8791 | 0.8721 | 0.7719 | 0.7785 | 0.8650 | 0.8518 | 0.8636 | 0.8661 | 0.8272 | 0.8147 | 0.8345 |
| 410 | cg12658552 | 0.6574 | 0.8013 | 0.8870 | 0.8483 | 0.8324 | 0.6998 | 0.6994 | 0.8372 | 0.8290 | 0.8559 | 0.8246 | 0.8237 | 0.7907 | 0.7689 |
| 411 | cg12671744 | 0.4919 | 0.5683 | 0.5499 | 0.6135 | 0.3824 | 0.5224 | 0.5975 | 0.6442 | 0.5283 | 0.6280 | 0.6375 | 0.5207 | 0.6295 | 0.5941 |
| 412 | cg12694555 | 0.7148 | 0.8203 | 0.8513 | 0.8422 | 0.8448 | 0.6939 | 0.7226 | 0.8181 | 0.8031 | 0.8538 | 0.8325 | 0.8330 | 0.8085 | 0.8059 |
| 413 | cg12775613 | 0.7369 | 0.8489 | 0.8729 | 0.8629 | 0.8550 | 0.7448 | 0.7679 | 0.8661 | 0.8446 | 0.8672 | 0.8586 | 0.8541 | 0.8283 | 0.8308 |
| 414 | cg12791554 | 0.6909 | 0.8652 | 0.8818 | 0.8378 | 0.8503 | 0.7239 | 0.7397 | 0.8372 | 0.8369 | 0.8452 | 0.8478 | 0.8293 | 0.7843 | 0.8164 |
| 415 | cg12856392 | 0.5604 | 0.6299 | 0.5645 | 0.5374 | 0.6398 | 0.5514 | 0.5256 | 0.6129 | 0.6185 | 0.5809 | 0.6776 | 0.5825 | 0.5650 | 0.4936 |
| 416 | cg12864235 | 0.6015 | 0.6955 | 0.7008 | 0.7552 | 0.7484 | 0.6429 | 0.6435 | 0.7353 | 0.6015 | 0.7572 | 0.6440 | 0.6400 | 0.6260 | 0.6793 |
| 417 | cg12879425 | 0.2156 | 0.1022 | 0.0644 | 0.0889 | 0.0929 | 0.2062 | 0.1779 | 0.1005 | 0.0945 | 0.0778 | 0.1021 | 0.0897 | 0.1270 | 0.1022 |
| 418 | cg12952132 | 0.7100 | 0.7170 | 0.7699 | 0.6394 | 0.7323 | 0.7266 | 0.6422 | 0.6043 | 0.7287 | 0.7132 | 0.7338 | 0.5386 | 0.7098 | 0.7295 |
| 419 | cg12958813 | 0.6686 | 0.8238 | 0.8465 | 0.7803 | 0.8242 | 0.7012 | 0.7255 | 0.8125 | 0.8152 | 0.8240 | 0.8414 | 0.7906 | 0.7931 | 0.7911 |

|     |            |        |        |        |        |        |        |        |        |        |        |        |        |        |        |
|-----|------------|--------|--------|--------|--------|--------|--------|--------|--------|--------|--------|--------|--------|--------|--------|
| 420 | cg12966875 | 0.1878 | 0.1853 | 0.1524 | 0.2862 | 0.2598 | 0.1442 | 0.2639 | 0.1742 | 0.1768 | 0.2204 | 0.2000 | 0.2329 | 0.2224 | 0.1999 |
| 421 | cg12969407 | 0.1745 | 0.1258 | 0.0965 | 0.1077 | 0.1018 | 0.1481 | 0.1572 | 0.1190 | 0.1304 | 0.1273 | 0.1265 | 0.1105 | 0.1479 | 0.1917 |
| 422 | cg13002506 | 0.7481 | 0.8509 | 0.8978 | 0.8736 | 0.8932 | 0.7613 | 0.7444 | 0.8740 | 0.8534 | 0.9010 | 0.8736 | 0.8530 | 0.8536 | 0.8434 |
| 423 | cg13007988 | 0.7178 | 0.7798 | 0.8008 | 0.7611 | 0.8014 | 0.6231 | 0.6681 | 0.7631 | 0.7436 | 0.7606 | 0.7747 | 0.7217 | 0.7039 | 0.6993 |
| 424 | cg13041032 | 0.7547 | 0.8607 | 0.8964 | 0.8659 | 0.8760 | 0.7517 | 0.7612 | 0.8658 | 0.8522 | 0.8838 | 0.8674 | 0.8390 | 0.8207 | 0.8381 |
| 425 | cg13044277 | 0.3346 | 0.2057 | 0.1334 | 0.1971 | 0.1669 | 0.2993 | 0.2889 | 0.1651 | 0.2046 | 0.1673 | 0.1829 | 0.2072 | 0.2112 | 0.1942 |
| 426 | cg13055278 | 0.0742 | 0.4547 | 0.5108 | 0.0788 | 0.3547 | 0.0687 | 0.0744 | 0.0811 | 0.3355 | 0.0723 | 0.5042 | 0.0805 | 0.3231 | 0.0759 |
| 427 | cg13059335 | 0.6375 | 0.7818 | 0.7957 | 0.7913 | 0.7829 | 0.6276 | 0.6555 | 0.7808 | 0.7497 | 0.7974 | 0.7873 | 0.7346 | 0.7504 | 0.7357 |
| 428 | cg13077930 | 0.5499 | 0.7247 | 0.7905 | 0.7320 | 0.7378 | 0.6259 | 0.5747 | 0.6940 | 0.7316 | 0.7294 | 0.7394 | 0.6894 | 0.6665 | 0.6914 |
| 429 | cg13086586 | 0.3495 | 0.3999 | 0.4413 | 0.4521 | 0.4564 | 0.4269 | 0.4081 | 0.3825 | 0.4325 | 0.4333 | 0.4666 | 0.4343 | 0.3853 | 0.3555 |
| 430 | cg13109289 | 0.6553 | 0.8348 | 0.8673 | 0.8173 | 0.8423 | 0.7503 | 0.6963 | 0.7936 | 0.8185 | 0.8451 | 0.8268 | 0.8137 | 0.8225 | 0.8006 |
| 431 | cg13119609 | 0.5818 | 0.6847 | 0.7172 | 0.5490 | 0.5450 | 0.5759 | 0.5455 | 0.7010 | 0.5393 | 0.6175 | 0.6821 | 0.7013 | 0.5590 | 0.6105 |
| 432 | cg13120814 | 0.1782 | 0.1428 | 0.0949 | 0.1045 | 0.1068 | 0.2010 | 0.1638 | 0.0935 | 0.1332 | 0.1076 | 0.1137 | 0.1072 | 0.1239 | 0.1472 |
| 433 | cg13131015 | 0.6258 | 0.7965 | 0.7991 | 0.7976 | 0.7599 | 0.7095 | 0.6506 | 0.8061 | 0.7978 | 0.7889 | 0.7863 | 0.7743 | 0.7053 | 0.7741 |
| 434 | cg13140740 | 0.1322 | 0.1958 | 0.2556 | 0.2189 | 0.2252 | 0.1669 | 0.1327 | 0.2228 | 0.2004 | 0.2765 | 0.2034 | 0.1819 | 0.2024 | 0.2234 |
| 435 | cg13149996 | 0.6353 | 0.7906 | 0.8674 | 0.8169 | 0.8253 | 0.6939 | 0.7045 | 0.8230 | 0.8190 | 0.8218 | 0.8394 | 0.7923 | 0.7757 | 0.8117 |
| 436 | cg13168374 | 0.7459 | 0.8575 | 0.8756 | 0.8578 | 0.8687 | 0.7720 | 0.7688 | 0.8769 | 0.8549 | 0.8758 | 0.8765 | 0.8599 | 0.8240 | 0.8033 |
| 437 | cg13217373 | 0.6678 | 0.7549 | 0.7561 | 0.6728 | 0.8099 | 0.6461 | 0.6360 | 0.7535 | 0.6755 | 0.8184 | 0.6989 | 0.6459 | 0.6769 | 0.6674 |
| 438 | cg13235447 | 0.2967 | 0.1810 | 0.1426 | 0.1808 | 0.1844 | 0.3128 | 0.3123 | 0.1631 | 0.2105 | 0.1718 | 0.2016 | 0.1864 | 0.2298 | 0.2782 |
| 439 | cg13281868 | 0.6967 | 0.8147 | 0.8659 | 0.8757 | 0.8543 | 0.7706 | 0.7251 | 0.8659 | 0.8275 | 0.8612 | 0.8220 | 0.8718 | 0.8402 | 0.8333 |
| 440 | cg13302154 | 0.5853 | 0.5412 | 0.5401 | 0.4923 | 0.5310 | 0.4821 | 0.5403 | 0.5456 | 0.5301 | 0.5715 | 0.4727 | 0.6294 | 0.5330 | 0.4320 |
| 441 | cg13328485 | 0.5129 | 0.7157 | 0.7707 | 0.7347 | 0.7429 | 0.6331 | 0.6022 | 0.7016 | 0.7065 | 0.7497 | 0.6996 | 0.7014 | 0.6830 | 0.7234 |
| 442 | cg13334990 | 0.1740 | 0.1525 | 0.1859 | 0.2103 | 0.2077 | 0.1700 | 0.1952 | 0.1795 | 0.2129 | 0.2405 | 0.1747 | 0.1603 | 0.2018 | 0.2148 |
| 443 | cg13406768 | 0.6806 | 0.8178 | 0.8448 | 0.8551 | 0.8517 | 0.7251 | 0.7641 | 0.8476 | 0.8277 | 0.8242 | 0.8245 | 0.8214 | 0.8070 | 0.8222 |
| 444 | cg13410437 | 0.8021 | 0.8775 | 0.8964 | 0.8987 | 0.9108 | 0.8009 | 0.8335 | 0.8827 | 0.8933 | 0.8966 | 0.8910 | 0.8979 | 0.8590 | 0.8529 |
| 445 | cg13435792 | 0.5642 | 0.6611 | 0.6428 | 0.6627 | 0.6472 | 0.5608 | 0.7263 | 0.7324 | 0.5860 | 0.7520 | 0.7879 | 0.6447 | 0.6364 | 0.5974 |
| 446 | cg13436996 | 0.5870 | 0.7761 | 0.8475 | 0.8142 | 0.7939 | 0.6359 | 0.6244 | 0.7840 | 0.7771 | 0.7766 | 0.8012 | 0.7742 | 0.7598 | 0.7475 |
| 447 | cg13442811 | 0.4763 | 0.5852 | 0.6402 | 0.6392 | 0.6180 | 0.5354 | 0.5095 | 0.6296 | 0.6204 | 0.6606 | 0.6342 | 0.5881 | 0.5519 | 0.6078 |
| 448 | cg13445249 | 0.5790 | 0.7091 | 0.7442 | 0.7016 | 0.7166 | 0.6186 | 0.5531 | 0.7238 | 0.7041 | 0.7184 | 0.7212 | 0.6854 | 0.6417 | 0.7273 |
| 449 | cg13459560 | 0.5090 | 0.7334 | 0.8153 | 0.7904 | 0.7891 | 0.5885 | 0.6427 | 0.7577 | 0.7472 | 0.7899 | 0.7738 | 0.6358 | 0.7075 | 0.6995 |
| 450 | cg13463167 | 0.6616 | 0.8043 | 0.8501 | 0.8257 | 0.8237 | 0.6916 | 0.6860 | 0.8198 | 0.8212 | 0.8227 | 0.8343 | 0.7848 | 0.7666 | 0.7987 |
| 451 | cg13496066 | 0.7173 | 0.8044 | 0.8319 | 0.8365 | 0.8531 | 0.7512 | 0.7124 | 0.8187 | 0.8020 | 0.8254 | 0.8181 | 0.7917 | 0.7392 | 0.8100 |
| 452 | cg13507429 | 0.6410 | 0.6706 | 0.7731 | 0.8018 | 0.6576 | 0.7889 | 0.5391 | 0.7935 | 0.8218 | 0.7403 | 0.7394 | 0.7708 | 0.8204 | 0.7806 |
| 453 | cg13523386 | 0.6364 | 0.8389 | 0.8590 | 0.8646 | 0.8383 | 0.6883 | 0.6831 | 0.8359 | 0.8012 | 0.8452 | 0.8381 | 0.8289 | 0.7787 | 0.7909 |
| 454 | cg13580728 | 0.6022 | 0.7579 | 0.8299 | 0.7326 | 0.7986 | 0.6337 | 0.6285 | 0.7302 | 0.7670 | 0.7951 | 0.7493 | 0.7623 | 0.7324 | 0.7046 |
| 455 | cg13629753 | 0.2488 | 0.1604 | 0.1081 | 0.1314 | 0.1221 | 0.2729 | 0.1983 | 0.1263 | 0.1504 | 0.1151 | 0.1531 | 0.1230 | 0.1876 | 0.1736 |
| 456 | cg13673094 | 0.2528 | 0.1435 | 0.1142 | 0.1289 | 0.1564 | 0.2681 | 0.2506 | 0.1568 | 0.1592 | 0.1367 | 0.1326 | 0.1343 | 0.1989 | 0.1972 |
| 457 | cg13703941 | 0.6200 | 0.7519 | 0.8321 | 0.7986 | 0.7919 | 0.6463 | 0.6557 | 0.7787 | 0.7852 | 0.8003 | 0.8060 | 0.7552 | 0.7562 | 0.7762 |
| 458 | cg13759778 | 0.6451 | 0.7845 | 0.8429 | 0.8227 | 0.8248 | 0.6481 | 0.6812 | 0.8087 | 0.8087 | 0.8226 | 0.8019 | 0.7892 | 0.7666 | 0.7967 |
| 459 | cg13771579 | 0.9157 | 0.8560 | 0.7552 | 0.8893 | 0.7379 | 0.8828 | 0.9170 | 0.7790 | 0.8741 | 0.8920 | 0.8951 | 0.7880 | 0.8082 | 0.8104 |
| 460 | cg13817266 | 0.4329 | 0.3593 | 0.3115 | 0.4082 | 0.3107 | 0.4185 | 0.3635 | 0.3460 | 0.4765 | 0.3450 | 0.4278 | 0.3290 | 0.4602 | 0.3306 |
| 461 | cg13943564 | 0.5863 | 0.7059 | 0.7725 | 0.7538 | 0.7580 | 0.6318 | 0.5740 | 0.7459 | 0.7261 | 0.7793 | 0.7404 | 0.7000 | 0.7450 | 0.7379 |
| 462 | cg13968390 | 0.6461 | 0.6483 | 0.8401 | 0.8285 | 0.6733 | 0.7898 | 0.6101 | 0.6505 | 0.6492 | 0.6731 | 0.8419 | 0.8002 | 0.4762 | 0.4109 |
| 463 | cg13980719 | 0.5786 | 0.6653 | 0.6341 | 0.6786 | 0.7341 | 0.5903 | 0.5675 | 0.7041 | 0.6434 | 0.7239 | 0.6519 | 0.6221 | 0.6037 | 0.5992 |
| 464 | cg13980834 | 0.7084 | 0.8295 | 0.8683 | 0.8494 | 0.8563 | 0.7804 | 0.7361 | 0.8338 | 0.8517 | 0.8503 | 0.8512 | 0.8623 | 0.8118 | 0.8206 |
| 465 | cg13986618 | 0.6269 | 0.7590 | 0.8412 | 0.7960 | 0.7619 | 0.6554 | 0.6493 | 0.7793 | 0.7893 | 0.8007 | 0.8052 | 0.7704 | 0.7479 | 0.7116 |
| 466 | cg13995453 | 0.6539 | 0.7315 | 0.8009 | 0.8002 | 0.7752 | 0.6706 | 0.7026 | 0.7930 | 0.7754 | 0.7672 | 0.7448 | 0.7240 | 0.6572 | 0.7715 |

|     |             |        |        |        |        |        |        |        |        |        |        |        |        |        |        |
|-----|-------------|--------|--------|--------|--------|--------|--------|--------|--------|--------|--------|--------|--------|--------|--------|
| 467 | cg14009688  | 0.5477 | 0.4249 | 0.5022 | 0.5527 | 0.5987 | 0.4618 | 0.4622 | 0.4969 | 0.4664 | 0.5119 | 0.5453 | 0.4924 | 0.5559 | 0.5111 |
| 468 | cg14069619  | 0.7091 | 0.8134 | 0.8374 | 0.8442 | 0.8567 | 0.7269 | 0.7284 | 0.8175 | 0.8015 | 0.8388 | 0.8465 | 0.8091 | 0.7772 | 0.7853 |
| 469 | cg14088161  | 0.6819 | 0.6889 | 0.7008 | 0.7251 | 0.7207 | 0.6595 | 0.6957 | 0.7195 | 0.7400 | 0.6910 | 0.6439 | 0.6639 | 0.6674 | 0.6444 |
| 470 | cg141119236 | 0.3516 | 0.3277 | 0.3645 | 0.4356 | 0.4366 | 0.3561 | 0.3901 | 0.4089 | 0.3608 | 0.3789 | 0.3390 | 0.4282 | 0.3897 | 0.4063 |
| 471 | cg14143055  | 0.5832 | 0.7236 | 0.8162 | 0.7605 | 0.7692 | 0.6412 | 0.6466 | 0.7724 | 0.7679 | 0.7657 | 0.7781 | 0.7401 | 0.7485 | 0.7439 |
| 472 | cg14154330  | 0.5785 | 0.5114 | 0.5787 | 0.5484 | 0.5526 | 0.5318 | 0.5410 | 0.5460 | 0.4914 | 0.6029 | 0.5493 | 0.5865 | 0.5997 | 0.5663 |
| 473 | cg14159672  | 0.8638 | 0.1310 | 0.3626 | 0.1463 | 0.1204 | 0.4696 | 0.1083 | 0.4242 | 0.2296 | 0.1554 | 0.0571 | 0.4466 | 0.8271 | 0.3853 |
| 474 | cg14191109  | 0.0502 | 0.0707 | 0.0569 | 0.0709 | 0.0674 | 0.0691 | 0.0419 | 0.1756 | 0.0890 | 0.2123 | 0.0503 | 0.1122 | 0.0464 | 0.0641 |
| 475 | cg14209870  | 0.8784 | 0.5408 | 0.9038 | 0.9093 | 0.9074 | 0.8778 | 0.8706 | 0.8989 | 0.8911 | 0.9084 | 0.9102 | 0.8925 | 0.8942 | 0.8830 |
| 476 | cg14252059  | 0.7597 | 0.7897 | 0.8447 | 0.8200 | 0.8282 | 0.7321 | 0.7158 | 0.8245 | 0.8099 | 0.8142 | 0.8122 | 0.7615 | 0.7442 | 0.7623 |
| 477 | cg14260643  | 0.4710 | 0.4966 | 0.4814 | 0.5082 | 0.4656 | 0.3910 | 0.4330 | 0.5047 | 0.4579 | 0.5029 | 0.5182 | 0.4693 | 0.4777 | 0.5067 |
| 478 | cg14301635  | 0.6962 | 0.7642 | 0.7688 | 0.7708 | 0.7653 | 0.6785 | 0.6638 | 0.7855 | 0.7332 | 0.8037 | 0.7597 | 0.7149 | 0.7398 | 0.7203 |
| 479 | cg14332079  | 0.0442 | 0.0416 | 0.0281 | 0.0341 | 0.0361 | 0.0323 | 0.0275 | 0.0433 | 0.0326 | 0.0385 | 0.0388 | 0.0393 | 0.0457 | 0.0335 |
| 480 | cg14367014  | 0.5848 | 0.6813 | 0.7680 | 0.7443 | 0.7320 | 0.5475 | 0.6374 | 0.7330 | 0.7225 | 0.7356 | 0.7221 | 0.7450 | 0.7225 | 0.7238 |
| 481 | cg14371329  | 0.7483 | 0.8781 | 0.8834 | 0.8641 | 0.8747 | 0.7543 | 0.7537 | 0.8493 | 0.8386 | 0.8640 | 0.8706 | 0.8547 | 0.8371 | 0.8277 |
| 482 | cg14379865  | 0.7559 | 0.8561 | 0.8869 | 0.8649 | 0.8759 | 0.7853 | 0.7566 | 0.8609 | 0.8425 | 0.8653 | 0.8547 | 0.8547 | 0.8132 | 0.8022 |
| 483 | cg14401592  | 0.5661 | 0.7271 | 0.7544 | 0.7476 | 0.7512 | 0.6422 | 0.6231 | 0.7376 | 0.7466 | 0.7659 | 0.7407 | 0.7142 | 0.6966 | 0.7021 |
| 484 | cg14444244  | 0.7305 | 0.8104 | 0.8556 | 0.8313 | 0.8401 | 0.7461 | 0.7045 | 0.8218 | 0.8344 | 0.8413 | 0.8290 | 0.8340 | 0.8168 | 0.8059 |
| 485 | cg14458615  | 0.7130 | 0.8097 | 0.8200 | 0.8112 | 0.8417 | 0.7423 | 0.7190 | 0.7867 | 0.8098 | 0.7901 | 0.8327 | 0.7717 | 0.7590 | 0.7904 |
| 486 | cg14462830  | 0.5907 | 0.7397 | 0.7997 | 0.7833 | 0.8016 | 0.6134 | 0.6008 | 0.7612 | 0.7444 | 0.7675 | 0.7840 | 0.7460 | 0.7230 | 0.7413 |
| 487 | cg14469290  | 0.8018 | 0.8321 | 0.8653 | 0.8564 | 0.8420 | 0.7730 | 0.7572 | 0.8371 | 0.8086 | 0.8398 | 0.8274 | 0.7912 | 0.8191 | 0.8090 |
| 488 | cg14613546  | 0.6217 | 0.7866 | 0.8386 | 0.8087 | 0.8337 | 0.7039 | 0.6728 | 0.8187 | 0.7901 | 0.8188 | 0.7865 | 0.7841 | 0.7318 | 0.7482 |
| 489 | cg14662172  | 0.6727 | 0.7700 | 0.8082 | 0.7742 | 0.7832 | 0.6791 | 0.6862 | 0.7767 | 0.7928 | 0.7670 | 0.7874 | 0.7986 | 0.7376 | 0.7748 |
| 490 | cg14758526  | 0.6226 | 0.8151 | 0.8719 | 0.8774 | 0.8530 | 0.7173 | 0.6665 | 0.8515 | 0.8562 | 0.8694 | 0.8373 | 0.8059 | 0.7923 | 0.8204 |
| 491 | cg14787704  | 0.5819 | 0.7649 | 0.7997 | 0.7742 | 0.7790 | 0.6423 | 0.6555 | 0.7604 | 0.7584 | 0.7537 | 0.7798 | 0.7528 | 0.7425 | 0.7593 |
| 492 | cg14826456  | 0.2689 | 0.1965 | 0.2115 | 0.2277 | 0.1894 | 0.1622 | 0.2859 | 0.2594 | 0.2949 | 0.2702 | 0.2586 | 0.2627 | 0.2678 | 0.1766 |
| 493 | cg14834436  | 0.2340 | 0.1517 | 0.1005 | 0.1164 | 0.1290 | 0.2161 | 0.2011 | 0.1165 | 0.1465 | 0.1217 | 0.1252 | 0.1184 | 0.1814 | 0.1475 |
| 494 | cg14837082  | 0.7156 | 0.7589 | 0.7925 | 0.7818 | 0.7812 | 0.6923 | 0.6547 | 0.7437 | 0.7522 | 0.7933 | 0.7995 | 0.7659 | 0.7444 | 0.7466 |
| 495 | cg14893161  | 0.9044 | 0.2799 | 0.4931 | 0.2676 | 0.2245 | 0.5639 | 0.1795 | 0.5810 | 0.3393 | 0.3313 | 0.1020 | 0.5726 | 0.8950 | 0.5763 |
| 496 | cg14898892  | 0.6486 | 0.7952 | 0.8294 | 0.8095 | 0.8116 | 0.7081 | 0.6776 | 0.8115 | 0.7989 | 0.8288 | 0.8021 | 0.8067 | 0.7614 | 0.7804 |
| 497 | cg14917512  | 0.2239 | 0.1651 | 0.1532 | 0.3055 | 0.1717 | 0.1254 | 0.1647 | 0.1132 | 0.2788 | 0.3087 | 0.3987 | 0.2305 | 0.2259 | 0.2683 |
| 498 | cg14932684  | 0.0426 | 0.0410 | 0.0439 | 0.1199 | 0.0446 | 0.0350 | 0.0299 | 0.1182 | 0.0935 | 0.0616 | 0.0564 | 0.0434 | 0.0313 | 0.0536 |
| 499 | cg15133917  | 0.6067 | 0.7658 | 0.7755 | 0.7834 | 0.7950 | 0.6553 | 0.6876 | 0.7619 | 0.7295 | 0.7864 | 0.7520 | 0.7714 | 0.6567 | 0.7472 |
| 500 | cg15201291  | 0.6176 | 0.8282 | 0.8809 | 0.8629 | 0.8610 | 0.7164 | 0.7259 | 0.8444 | 0.8382 | 0.8669 | 0.8429 | 0.8172 | 0.7919 | 0.8471 |
| 501 | cg15264273  | 0.7655 | 0.8431 | 0.8708 | 0.8477 | 0.8572 | 0.7387 | 0.7401 | 0.8653 | 0.8396 | 0.8687 | 0.8385 | 0.8226 | 0.8290 | 0.8377 |
| 502 | cg15298545  | 0.6705 | 0.7471 | 0.7963 | 0.7999 | 0.7838 | 0.6627 | 0.6509 | 0.7669 | 0.7565 | 0.7880 | 0.7884 | 0.7726 | 0.7330 | 0.7868 |
| 503 | cg15307449  | 0.5737 | 0.6760 | 0.7731 | 0.7231 | 0.7561 | 0.5537 | 0.5876 | 0.7002 | 0.6670 | 0.7321 | 0.7565 | 0.6511 | 0.6720 | 0.7070 |
| 504 | cg15308737  | 0.8663 | 0.8817 | 0.9076 | 0.8271 | 0.9152 | 0.7527 | 0.8324 | 0.8919 | 0.8599 | 0.9086 | 0.8861 | 0.8789 | 0.7646 | 0.7907 |
| 505 | cg15309578  | 0.4731 | 0.6623 | 0.7477 | 0.7043 | 0.7251 | 0.5465 | 0.5589 | 0.6864 | 0.7090 | 0.7197 | 0.6940 | 0.7171 | 0.6503 | 0.6819 |
| 506 | cg15310162  | 0.7755 | 0.8085 | 0.8509 | 0.8510 | 0.8231 | 0.7409 | 0.7250 | 0.8202 | 0.8199 | 0.8398 | 0.8337 | 0.7968 | 0.7878 | 0.8187 |
| 507 | cg15312323  | 0.3997 | 0.5627 | 0.6439 | 0.6099 | 0.5904 | 0.4549 | 0.4460 | 0.5656 | 0.5430 | 0.5909 | 0.5444 | 0.5009 | 0.5798 | 0.6160 |
| 508 | cg15329866  | 0.7183 | 0.8279 | 0.8693 | 0.8501 | 0.8513 | 0.7324 | 0.7156 | 0.8441 | 0.8215 | 0.8343 | 0.8454 | 0.8304 | 0.7854 | 0.8134 |
| 509 | cg15364618  | 0.4771 | 0.2600 | 0.3403 | 0.4925 | 0.3522 | 0.3301 | 0.2061 | 0.2057 | 0.3392 | 0.0936 | 0.2419 | 0.3682 | 0.3298 | 0.1999 |
| 510 | cg15383120  | 0.5738 | 0.6642 | 0.0454 | 0.6029 | 0.6449 | 0.5792 | 0.4959 | 0.5715 | 0.5739 | 0.0439 | 0.5858 | 0.6547 | 0.6006 | 0.5313 |
| 511 | cg15398520  | 0.6918 | 0.8021 | 0.8430 | 0.8173 | 0.8303 | 0.6927 | 0.7401 | 0.8120 | 0.7829 | 0.8245 | 0.8302 | 0.8405 | 0.7956 | 0.7485 |
| 512 | cg15403517  | 0.3797 | 0.3192 | 0.3400 | 0.2559 | 0.2964 | 0.3941 | 0.2792 | 0.3685 | 0.2897 | 0.3969 | 0.3595 | 0.3054 | 0.4481 | 0.4068 |
| 513 | cg15408407  | 0.0298 | 0.0348 | 0.0416 | 0.1050 | 0.0485 | 0.1025 | 0.0388 | 0.0923 | 0.1054 | 0.0302 | 0.0437 | 0.0577 | 0.0271 | 0.0442 |

|     |            |        |        |        |        |        |        |        |        |        |        |        |        |        |        |
|-----|------------|--------|--------|--------|--------|--------|--------|--------|--------|--------|--------|--------|--------|--------|--------|
| 514 | cg15417244 | 0.8278 | 0.8585 | 0.8137 | 0.8576 | 0.8855 | 0.8141 | 0.8283 | 0.8700 | 0.8755 | 0.8796 | 0.8818 | 0.8146 | 0.8155 | 0.7807 |
| 515 | cg15489422 | 0.6186 | 0.7436 | 0.8250 | 0.7856 | 0.8069 | 0.6354 | 0.6403 | 0.7883 | 0.7783 | 0.7953 | 0.7947 | 0.7810 | 0.7296 | 0.7356 |
| 516 | cg15527554 | 0.7075 | 0.8002 | 0.8101 | 0.8112 | 0.8010 | 0.7008 | 0.6840 | 0.7853 | 0.7297 | 0.8264 | 0.7893 | 0.7784 | 0.7732 | 0.7729 |
| 517 | cg15543551 | 0.1702 | 0.1306 | 0.1423 | 0.1360 | 0.1808 | 0.2424 | 0.1634 | 0.2228 | 0.2229 | 0.1483 | 0.1706 | 0.1809 | 0.2571 | 0.1269 |
| 518 | cg15559700 | 0.7117 | 0.7967 | 0.8200 | 0.8119 | 0.8261 | 0.7149 | 0.6867 | 0.8218 | 0.7943 | 0.8145 | 0.8204 | 0.7835 | 0.7541 | 0.8035 |
| 519 | cg15583072 | 0.5384 | 0.6766 | 0.7632 | 0.7518 | 0.7304 | 0.6107 | 0.5786 | 0.7044 | 0.7480 | 0.7317 | 0.7432 | 0.7334 | 0.6841 | 0.6857 |
| 520 | cg15610233 | 0.6518 | 0.8039 | 0.8158 | 0.8399 | 0.8048 | 0.7170 | 0.6963 | 0.8113 | 0.7800 | 0.8083 | 0.7999 | 0.7444 | 0.7695 | 0.7709 |
| 521 | cg15612847 | 0.7575 | 0.8447 | 0.8611 | 0.8425 | 0.8511 | 0.7664 | 0.7591 | 0.8356 | 0.8101 | 0.8565 | 0.8545 | 0.7985 | 0.8259 | 0.8209 |
| 522 | cg15661409 | 0.7047 | 0.8337 | 0.8572 | 0.8376 | 0.8484 | 0.7161 | 0.7109 | 0.8038 | 0.8082 | 0.8331 | 0.8461 | 0.8087 | 0.8146 | 0.8439 |
| 523 | cg15684563 | 0.6451 | 0.7290 | 0.7607 | 0.7845 | 0.7935 | 0.6043 | 0.5793 | 0.7591 | 0.7499 | 0.7796 | 0.7692 | 0.7504 | 0.7162 | 0.7264 |
| 524 | cg15691649 | 0.7422 | 0.8275 | 0.7389 | 0.6897 | 0.7254 | 0.7185 | 0.7207 | 0.7529 | 0.7651 | 0.7597 | 0.7270 | 0.7158 | 0.6778 | 0.8345 |
| 525 | cg15722679 | 0.3185 | 0.1589 | 0.1576 | 0.1954 | 0.1597 | 0.2635 | 0.2479 | 0.1831 | 0.2134 | 0.1704 | 0.1761 | 0.1644 | 0.1431 | 0.1744 |
| 526 | cg15740508 | 0.6370 | 0.7729 | 0.8473 | 0.8145 | 0.8339 | 0.6885 | 0.6693 | 0.8050 | 0.7870 | 0.8312 | 0.7992 | 0.7898 | 0.7821 | 0.7712 |
| 527 | cg15741583 | 0.5121 | 0.6068 | 0.6178 | 0.5959 | 0.6462 | 0.5870 | 0.5030 | 0.6400 | 0.5679 | 0.6237 | 0.6155 | 0.5885 | 0.5113 | 0.6255 |
| 528 | cg15761405 | 0.6037 | 0.7210 | 0.7535 | 0.7654 | 0.7652 | 0.6463 | 0.6301 | 0.7698 | 0.7346 | 0.7887 | 0.7524 | 0.7314 | 0.7052 | 0.7544 |
| 529 | cg15798153 | 0.6504 | 0.6747 | 0.7165 | 0.6811 | 0.7375 | 0.6773 | 0.6266 | 0.7461 | 0.7681 | 0.7518 | 0.7927 | 0.7334 | 0.7652 | 0.6659 |
| 530 | cg15811427 | 0.6686 | 0.7779 | 0.7901 | 0.8011 | 0.7694 | 0.6741 | 0.6539 | 0.7865 | 0.7415 | 0.8015 | 0.7539 | 0.7340 | 0.7423 | 0.7682 |
| 531 | cg15842430 | 0.7233 | 0.8111 | 0.8176 | 0.8149 | 0.8231 | 0.7482 | 0.7363 | 0.8312 | 0.8008 | 0.8323 | 0.7980 | 0.8167 | 0.8045 | 0.7504 |
| 532 | cg15847988 | 0.7179 | 0.8499 | 0.8902 | 0.8827 | 0.8828 | 0.7286 | 0.7509 | 0.8787 | 0.8503 | 0.8756 | 0.8634 | 0.8407 | 0.8368 | 0.8223 |
| 533 | cg15869022 | 0.4944 | 0.5255 | 0.5230 | 0.4805 | 0.5237 | 0.4833 | 0.4659 | 0.4011 | 0.4491 | 0.4002 | 0.4042 | 0.4996 | 0.5288 | 0.3962 |
| 534 | cg15876417 | 0.2933 | 0.1587 | 0.1454 | 0.1919 | 0.1733 | 0.2553 | 0.2653 | 0.2074 | 0.1699 | 0.1649 | 0.2061 | 0.1813 | 0.1960 | 0.1709 |
| 535 | cg15905979 | 0.6689 | 0.7710 | 0.8168 | 0.7868 | 0.7042 | 0.7077 | 0.6754 | 0.7713 | 0.7610 | 0.8094 | 0.6960 | 0.7571 | 0.7525 | 0.7911 |
| 536 | cg16019620 | 0.7025 | 0.8294 | 0.8698 | 0.8792 | 0.8610 | 0.7342 | 0.7213 | 0.8541 | 0.8545 | 0.8805 | 0.8430 | 0.7865 | 0.7942 | 0.8117 |
| 537 | cg16041611 | 0.0878 | 0.0649 | 0.0653 | 0.0856 | 0.0863 | 0.0366 | 0.0725 | 0.1543 | 0.1616 | 0.0800 | 0.0740 | 0.0594 | 0.0413 | 0.0682 |
| 538 | cg16068780 | 0.8131 | 0.8551 | 0.8726 | 0.7637 | 0.8779 | 0.8296 | 0.6513 | 0.8563 | 0.8367 | 0.8762 | 0.8670 | 0.7101 | 0.8350 | 0.8580 |
| 539 | cg16080552 | 0.5879 | 0.3665 | 0.4842 | 0.3748 | 0.6608 | 0.5108 | 0.3870 | 0.4334 | 0.5791 | 0.5250 | 0.5199 | 0.6297 | 0.6191 | 0.3878 |
| 540 | cg16098726 | 0.7940 | 0.7837 | 0.7815 | 0.6678 | 0.7866 | 0.7114 | 0.7362 | 0.7090 | 0.7386 | 0.7515 | 0.7371 | 0.7959 | 0.7917 | 0.7269 |
| 541 | cg16106497 | 0.8691 | 0.5210 | 0.6594 | 0.7555 | 0.9319 | 0.6711 | 0.3826 | 0.8980 | 0.7639 | 0.8092 | 0.7542 | 0.8655 | 0.3566 | 0.5654 |
| 542 | cg16219122 | 0.3778 | 0.5104 | 0.6236 | 0.5741 | 0.5054 | 0.4069 | 0.3503 | 0.5438 | 0.5263 | 0.5443 | 0.5068 | 0.4644 | 0.4484 | 0.4988 |
| 543 | cg16250754 | 0.2745 | 0.2256 | 0.1688 | 0.2194 | 0.2056 | 0.3531 | 0.2624 | 0.2185 | 0.2270 | 0.1888 | 0.1807 | 0.2007 | 0.2168 | 0.2175 |
| 544 | cg16290693 | 0.1110 | 0.1217 | 0.1953 | 0.1908 | 0.1323 | 0.1034 | 0.0533 | 0.2982 | 0.2544 | 0.1307 | 0.1250 | 0.1905 | 0.0730 | 0.0969 |
| 545 | cg16360372 | 0.7635 | 0.8411 | 0.8767 | 0.8514 | 0.8527 | 0.8057 | 0.7538 | 0.8529 | 0.8432 | 0.8509 | 0.8486 | 0.8376 | 0.8106 | 0.8628 |
| 546 | cg16386158 | 0.5591 | 0.7334 | 0.7087 | 0.7567 | 0.7868 | 0.6028 | 0.6455 | 0.7271 | 0.7070 | 0.7212 | 0.7133 | 0.7672 | 0.6091 | 0.7095 |
| 547 | cg16398289 | 0.6584 | 0.8277 | 0.8613 | 0.8276 | 0.8168 | 0.7081 | 0.7035 | 0.8041 | 0.8220 | 0.8234 | 0.8212 | 0.8092 | 0.7507 | 0.8083 |
| 548 | cg16404106 | 0.2557 | 0.2791 | 0.2701 | 0.3389 | 0.3857 | 0.2719 | 0.2473 | 0.2841 | 0.2758 | 0.4874 | 0.3020 | 0.2427 | 0.3441 | 0.3841 |
| 549 | cg16415646 | 0.6571 | 0.7761 | 0.8293 | 0.8084 | 0.8050 | 0.6716 | 0.6472 | 0.8045 | 0.7811 | 0.8052 | 0.8039 | 0.7913 | 0.7837 | 0.7730 |
| 550 | cg16474696 | 0.4424 | 0.4213 | 0.3264 | 0.0495 | 0.3299 | 0.3103 | 0.2050 | 0.0805 | 0.4088 | 0.4440 | 0.0853 | 0.5062 | 0.0675 | 0.3497 |
| 551 | cg16505550 | 0.6925 | 0.7333 | 0.7921 | 0.7933 | 0.8080 | 0.6542 | 0.6833 | 0.7671 | 0.7696 | 0.7934 | 0.8154 | 0.7636 | 0.7672 | 0.7076 |
| 552 | cg16506346 | 0.6446 | 0.7331 | 0.8227 | 0.7846 | 0.8225 | 0.6600 | 0.6442 | 0.7640 | 0.7800 | 0.7797 | 0.7952 | 0.7798 | 0.7807 | 0.7491 |
| 553 | cg16593081 | 0.8460 | 0.9001 | 0.9222 | 0.9114 | 0.9255 | 0.8138 | 0.8292 | 0.9060 | 0.9021 | 0.9133 | 0.8991 | 0.8807 | 0.8872 | 0.8907 |
| 554 | cg16625901 | 0.5183 | 0.6701 | 0.7472 | 0.7232 | 0.7144 | 0.5291 | 0.5595 | 0.6880 | 0.6659 | 0.7295 | 0.7168 | 0.6829 | 0.6515 | 0.6944 |
| 555 | cg16627949 | 0.6772 | 0.6850 | 0.7323 | 0.7656 | 0.7490 | 0.6522 | 0.5932 | 0.7534 | 0.6675 | 0.7364 | 0.7223 | 0.7093 | 0.7000 | 0.7347 |
| 556 | cg16636571 | 0.7076 | 0.7736 | 0.8137 | 0.7781 | 0.8024 | 0.7029 | 0.6414 | 0.7773 | 0.7738 | 0.7958 | 0.7945 | 0.7927 | 0.7587 | 0.7574 |
| 557 | cg16639595 | 0.7554 | 0.8470 | 0.4978 | 0.8409 | 0.8543 | 0.7811 | 0.7716 | 0.8393 | 0.4894 | 0.8567 | 0.8516 | 0.8313 | 0.8171 | 0.8163 |
| 558 | cg16650125 | 0.5306 | 0.7191 | 0.8124 | 0.7616 | 0.7530 | 0.6274 | 0.5886 | 0.7410 | 0.7522 | 0.7625 | 0.7743 | 0.7304 | 0.7183 | 0.7590 |
| 559 | cg16708623 | 0.5471 | 0.6613 | 0.6629 | 0.6543 | 0.6739 | 0.5461 | 0.5723 | 0.6261 | 0.6553 | 0.6758 | 0.6742 | 0.6655 | 0.6553 | 0.6356 |
| 560 | cg16708981 | 0.1676 | 0.1704 | 0.2324 | 0.1555 | 0.2333 | 0.1331 | 0.2346 | 0.1557 | 0.1373 | 0.1818 | 0.2176 | 0.1672 | 0.1956 | 0.1586 |



|     |            |        |        |        |        |        |        |        |        |        |        |        |        |        |        |
|-----|------------|--------|--------|--------|--------|--------|--------|--------|--------|--------|--------|--------|--------|--------|--------|
| 561 | cg16729794 | 0.5559 | 0.7088 | 0.7631 | 0.7308 | 0.7130 | 0.6100 | 0.5977 | 0.7251 | 0.6993 | 0.6976 | 0.7220 | 0.6749 | 0.6358 | 0.6892 |
| 562 | cg16753209 | 0.5708 | 0.6789 | 0.7917 | 0.7734 | 0.7934 | 0.6511 | 0.6167 | 0.7560 | 0.7419 | 0.7715 | 0.7744 | 0.7224 | 0.6876 | 0.7257 |
| 563 | cg16786458 | 0.4624 | 0.5162 | 0.4286 | 0.3659 | 0.5604 | 0.4231 | 0.4832 | 0.3982 | 0.4690 | 0.4845 | 0.4950 | 0.5052 | 0.4977 | 0.4631 |
| 564 | cg16794882 | 0.5774 | 0.7260 | 0.7600 | 0.7512 | 0.7592 | 0.6898 | 0.6393 | 0.7493 | 0.7456 | 0.7235 | 0.7588 | 0.7418 | 0.6990 | 0.7137 |
| 565 | cg16823701 | 0.6288 | 0.7971 | 0.8624 | 0.8295 | 0.8234 | 0.6441 | 0.6355 | 0.8230 | 0.8095 | 0.8447 | 0.8409 | 0.8177 | 0.7856 | 0.7887 |
| 566 | cg16855929 | 0.7100 | 0.8057 | 0.8318 | 0.8393 | 0.8407 | 0.7824 | 0.7268 | 0.8281 | 0.8311 | 0.8325 | 0.8452 | 0.8186 | 0.8048 | 0.7942 |
| 567 | cg16899306 | 0.7643 | 0.8315 | 0.8385 | 0.8349 | 0.4532 | 0.7862 | 0.4297 | 0.8397 | 0.4479 | 0.8468 | 0.8531 | 0.4395 | 0.8122 | 0.8192 |
| 568 | cg16907488 | 0.7735 | 0.8452 | 0.8587 | 0.8370 | 0.8612 | 0.8024 | 0.7708 | 0.8462 | 0.8338 | 0.8539 | 0.8620 | 0.8204 | 0.8169 | 0.8485 |
| 569 | cg16935075 | 0.5114 | 0.7284 | 0.7054 | 0.7538 | 0.7323 | 0.5396 | 0.5948 | 0.7181 | 0.7005 | 0.7370 | 0.7286 | 0.7019 | 0.6907 | 0.6825 |
| 570 | cg16957569 | 0.5587 | 0.6554 | 0.6888 | 0.6501 | 0.6663 | 0.5101 | 0.5345 | 0.6658 | 0.6329 | 0.6791 | 0.6643 | 0.5877 | 0.6253 | 0.6283 |
| 571 | cg16979445 | 0.7663 | 0.8519 | 0.8555 | 0.8421 | 0.8681 | 0.7552 | 0.7858 | 0.8425 | 0.8257 | 0.8613 | 0.8297 | 0.8450 | 0.8182 | 0.7897 |
| 572 | cg16986846 | 0.7464 | 0.7187 | 0.6718 | 0.7093 | 0.7211 | 0.6726 | 0.6991 | 0.7271 | 0.7135 | 0.7380 | 0.7315 | 0.7319 | 0.7673 | 0.7380 |
| 573 | cg16991589 | 0.4849 | 0.4586 | 0.4379 | 0.5237 | 0.3887 | 0.6083 | 0.3629 | 0.4883 | 0.4030 | 0.3953 | 0.6591 | 0.3916 | 0.4909 | 0.5392 |
| 574 | cg17001652 | 0.6348 | 0.7149 | 0.7593 | 0.7532 | 0.7758 | 0.6586 | 0.6392 | 0.7426 | 0.7220 | 0.7583 | 0.7772 | 0.7116 | 0.6868 | 0.7045 |
| 575 | cg17016000 | 0.7862 | 0.8443 | 0.8618 | 0.8747 | 0.8634 | 0.7874 | 0.7564 | 0.8549 | 0.8516 | 0.8517 | 0.8695 | 0.8495 | 0.8165 | 0.8257 |
| 576 | cg17041296 | 0.5575 | 0.7459 | 0.8166 | 0.7927 | 0.7762 | 0.6742 | 0.6261 | 0.7824 | 0.7583 | 0.7970 | 0.8018 | 0.6965 | 0.7384 | 0.7525 |
| 577 | cg17095279 | 0.6768 | 0.8158 | 0.8608 | 0.8213 | 0.8422 | 0.6830 | 0.6852 | 0.8116 | 0.8236 | 0.8202 | 0.8186 | 0.8042 | 0.8063 | 0.7777 |
| 578 | cg17099569 | 0.6324 | 0.6477 | 0.7207 | 0.7167 | 0.7007 | 0.6187 | 0.5037 | 0.6798 | 0.6853 | 0.7126 | 0.6984 | 0.6086 | 0.6357 | 0.6649 |
| 579 | cg17185639 | 0.8148 | 0.7463 | 0.7976 | 0.7854 | 0.8348 | 0.7526 | 0.7604 | 0.8364 | 0.7567 | 0.8035 | 0.8660 | 0.7866 | 0.8083 | 0.7867 |
| 580 | cg17214210 | 0.6226 | 0.7448 | 0.7966 | 0.7779 | 0.7753 | 0.6213 | 0.6287 | 0.7528 | 0.7527 | 0.7552 | 0.7480 | 0.7915 | 0.7272 | 0.7276 |
| 581 | cg17225169 | 0.7751 | 0.8420 | 0.8783 | 0.8584 | 0.8672 | 0.7833 | 0.7894 | 0.8779 | 0.8477 | 0.8697 | 0.8614 | 0.8529 | 0.8474 | 0.8483 |
| 582 | cg17233935 | 0.6184 | 0.6993 | 0.7438 | 0.7355 | 0.7348 | 0.6227 | 0.5861 | 0.7143 | 0.7080 | 0.7379 | 0.7157 | 0.7415 | 0.6479 | 0.7225 |
| 583 | cg17279839 | 0.2888 | 0.1765 | 0.1128 | 0.3110 | 0.1881 | 0.1242 | 0.2285 | 0.1259 | 0.3056 | 0.2003 | 0.2615 | 0.3369 | 0.2286 | 0.2577 |
| 584 | cg17281600 | 0.6342 | 0.7927 | 0.8121 | 0.7518 | 0.7878 | 0.6561 | 0.6598 | 0.7612 | 0.7609 | 0.7642 | 0.7768 | 0.7686 | 0.7132 | 0.6779 |
| 585 | cg17338258 | 0.7570 | 0.7253 | 0.7826 | 0.7232 | 0.7927 | 0.6769 | 0.6658 | 0.7280 | 0.7486 | 0.7957 | 0.7245 | 0.7586 | 0.7654 | 0.8030 |
| 586 | cg17348429 | 0.8425 | 0.7691 | 0.7395 | 0.7662 | 0.7784 | 0.8023 | 0.7738 | 0.7968 | 0.7746 | 0.7228 | 0.7803 | 0.7716 | 0.8069 | 0.8097 |
| 587 | cg17423978 | 0.6811 | 0.8323 | 0.8480 | 0.8324 | 0.8419 | 0.7210 | 0.7282 | 0.8271 | 0.8034 | 0.8456 | 0.8488 | 0.8281 | 0.7712 | 0.7907 |
| 588 | cg17439694 | 0.5893 | 0.7488 | 0.8035 | 0.7825 | 0.7612 | 0.6512 | 0.6278 | 0.7685 | 0.7782 | 0.7769 | 0.7807 | 0.7388 | 0.7463 | 0.7394 |
| 589 | cg17446142 | 0.7846 | 0.8676 | 0.8918 | 0.8824 | 0.8740 | 0.8335 | 0.8064 | 0.8878 | 0.8615 | 0.8857 | 0.8752 | 0.8639 | 0.8403 | 0.8587 |
| 590 | cg17480438 | 0.5126 | 0.6135 | 0.6032 | 0.6364 | 0.5921 | 0.5637 | 0.4771 | 0.6104 | 0.6049 | 0.5993 | 0.5926 | 0.5597 | 0.5537 | 0.6397 |
| 591 | cg17489451 | 0.5022 | 0.7056 | 0.7881 | 0.7426 | 0.7210 | 0.5820 | 0.5409 | 0.6999 | 0.7325 | 0.7384 | 0.7290 | 0.6743 | 0.6761 | 0.6995 |
| 592 | cg17496788 | 0.7214 | 0.8225 | 0.8646 | 0.8584 | 0.8623 | 0.7116 | 0.6961 | 0.8580 | 0.8289 | 0.8501 | 0.8589 | 0.8273 | 0.8078 | 0.8071 |
| 593 | cg17499294 | 0.7186 | 0.8415 | 0.8876 | 0.8653 | 0.8762 | 0.7147 | 0.7363 | 0.8516 | 0.8325 | 0.8586 | 0.8793 | 0.8700 | 0.8204 | 0.8422 |
| 594 | cg17503750 | 0.5872 | 0.7687 | 0.8446 | 0.8097 | 0.8081 | 0.6531 | 0.6432 | 0.7837 | 0.7920 | 0.8307 | 0.8173 | 0.7428 | 0.7862 | 0.8018 |
| 595 | cg17536071 | 0.5597 | 0.6875 | 0.7154 | 0.6884 | 0.7179 | 0.6192 | 0.5849 | 0.7253 | 0.7033 | 0.7330 | 0.7545 | 0.6844 | 0.6711 | 0.6813 |
| 596 | cg17571291 | 0.5520 | 0.1836 | 0.3663 | 0.3521 | 0.2684 | 0.1811 | 0.2846 | 0.1906 | 0.2360 | 0.3938 | 0.3865 | 0.6306 | 0.4221 | 0.3362 |
| 597 | cg17607024 | 0.5852 | 0.7261 | 0.7968 | 0.7442 | 0.7534 | 0.5721 | 0.6019 | 0.7494 | 0.7262 | 0.7410 | 0.7703 | 0.7271 | 0.6992 | 0.7097 |
| 598 | cg17607231 | 0.1795 | 0.1656 | 0.1591 | 0.1604 | 0.2814 | 0.1295 | 0.1563 | 0.1914 | 0.2129 | 0.2024 | 0.1390 | 0.2132 | 0.2453 | 0.1360 |
| 599 | cg17607973 | 0.0943 | 0.1645 | 0.1117 | 0.1843 | 0.1436 | 0.0978 | 0.1698 | 0.2497 | 0.2369 | 0.1674 | 0.0817 | 0.1158 | 0.0653 | 0.1117 |
| 600 | cg17630127 | 0.7837 | 0.8678 | 0.8841 | 0.8862 | 0.8885 | 0.7999 | 0.7878 | 0.8722 | 0.8527 | 0.8676 | 0.8773 | 0.8730 | 0.8467 | 0.8361 |
| 601 | cg17675150 | 0.7487 | 0.8260 | 0.8556 | 0.8443 | 0.8386 | 0.7410 | 0.7213 | 0.8352 | 0.8256 | 0.8581 | 0.8282 | 0.8388 | 0.8150 | 0.8160 |
| 602 | cg17711541 | 0.3620 | 0.4910 | 0.3712 | 0.3169 | 0.3782 | 0.3733 | 0.3919 | 0.4072 | 0.3561 | 0.4014 | 0.3475 | 0.3764 | 0.3860 | 0.4668 |
| 603 | cg17751569 | 0.7293 | 0.7977 | 0.8429 | 0.7969 | 0.8248 | 0.6988 | 0.7027 | 0.8108 | 0.7998 | 0.8137 | 0.8267 | 0.7935 | 0.7926 | 0.7737 |
| 604 | cg17761453 | 0.4309 | 0.8104 | 0.8381 | 0.8509 | 0.8396 | 0.8234 | 0.8016 | 0.8394 | 0.8380 | 0.8538 | 0.8284 | 0.8515 | 0.8060 | 0.7891 |
| 605 | cg17767931 | 0.5900 | 0.7796 | 0.8136 | 0.7778 | 0.7908 | 0.6406 | 0.6381 | 0.7753 | 0.7723 | 0.7841 | 0.7977 | 0.7663 | 0.7320 | 0.7699 |
| 606 | cg17791936 | 0.7752 | 0.3725 | 0.8239 | 0.8173 | 0.8016 | 0.7584 | 0.7901 | 0.8094 | 0.8028 | 0.8237 | 0.7711 | 0.7651 | 0.8229 | 0.7690 |
| 607 | cg17820828 | 0.5775 | 0.5851 | 0.6651 | 0.5877 | 0.7421 | 0.5152 | 0.5988 | 0.5374 | 0.5411 | 0.2898 | 0.7850 | 0.7795 | 0.8186 | 0.2913 |

|     |            |        |        |        |        |        |        |        |        |        |        |        |        |        |        |
|-----|------------|--------|--------|--------|--------|--------|--------|--------|--------|--------|--------|--------|--------|--------|--------|
| 608 | cg17829936 | 0.6953 | 0.7865 | 0.8874 | 0.9137 | 0.8880 | 0.8264 | 0.8665 | 0.7143 | 0.6991 | 0.7852 | 0.7761 | 0.7276 | 0.8647 | 0.8885 |
| 609 | cg17901463 | 0.0375 | 0.0390 | 0.0387 | 0.3668 | 0.0385 | 0.3375 | 0.0380 | 0.3571 | 0.3937 | 0.0360 | 0.3113 | 0.0460 | 0.0367 | 0.0522 |
| 610 | cg17925436 | 0.5769 | 0.7083 | 0.7655 | 0.7473 | 0.7140 | 0.5894 | 0.5969 | 0.7020 | 0.7100 | 0.7285 | 0.7178 | 0.6988 | 0.6673 | 0.7241 |
| 611 | cg17947599 | 0.7982 | 0.8868 | 0.9042 | 0.8864 | 0.8976 | 0.8093 | 0.7938 | 0.8833 | 0.8526 | 0.9008 | 0.8831 | 0.8705 | 0.8537 | 0.8486 |
| 612 | cg17977362 | 0.8970 | 0.8951 | 0.9068 | 0.8961 | 0.9082 | 0.8906 | 0.8967 | 0.8875 | 0.9051 | 0.9060 | 0.8968 | 0.9109 | 0.8843 | 0.8757 |
| 613 | cg18003135 | 0.6705 | 0.7657 | 0.7834 | 0.7555 | 0.7473 | 0.7073 | 0.7039 | 0.7384 | 0.7297 | 0.7469 | 0.7679 | 0.7307 | 0.7495 | 0.7175 |
| 614 | cg18087514 | 0.5753 | 0.6561 | 0.6471 | 0.6128 | 0.6370 | 0.6372 | 0.5631 | 0.6695 | 0.6601 | 0.6159 | 0.6116 | 0.5960 | 0.5711 | 0.6421 |
| 615 | cg18117393 | 0.6957 | 0.7982 | 0.8286 | 0.8123 | 0.8269 | 0.6658 | 0.6694 | 0.8163 | 0.7952 | 0.8415 | 0.8300 | 0.7721 | 0.7397 | 0.7947 |
| 616 | cg18128666 | 0.7340 | 0.8758 | 0.8926 | 0.9039 | 0.8912 | 0.8206 | 0.8035 | 0.8804 | 0.8833 | 0.8924 | 0.8823 | 0.8794 | 0.8623 | 0.8742 |
| 617 | cg18156583 | 0.2783 | 0.2046 | 0.1547 | 0.1996 | 0.1955 | 0.3189 | 0.2607 | 0.1785 | 0.1871 | 0.1668 | 0.1899 | 0.1761 | 0.2594 | 0.2387 |
| 618 | cg18184219 | 0.6290 | 0.8191 | 0.8476 | 0.8310 | 0.8240 | 0.6337 | 0.6692 | 0.8108 | 0.8253 | 0.8042 | 0.8281 | 0.8275 | 0.7773 | 0.7727 |
| 619 | cg18236721 | 0.5831 | 0.7019 | 0.7587 | 0.7472 | 0.7577 | 0.5977 | 0.5783 | 0.7444 | 0.6928 | 0.7077 | 0.6951 | 0.6415 | 0.6977 | 0.6741 |
| 620 | cg18254848 | 0.6912 | 0.8323 | 0.7899 | 0.8320 | 0.8422 | 0.7656 | 0.7226 | 0.8249 | 0.7910 | 0.8155 | 0.8251 | 0.8376 | 0.7492 | 0.8093 |
| 621 | cg18328334 | 0.4962 | 0.5533 | 0.6898 | 0.5695 | 0.6951 | 0.6714 | 0.5436 | 0.6398 | 0.5447 | 0.6412 | 0.6185 | 0.5838 | 0.5236 | 0.5582 |
| 622 | cg18344063 | 0.6106 | 0.7504 | 0.7934 | 0.7647 | 0.7896 | 0.6882 | 0.6445 | 0.7725 | 0.7629 | 0.7853 | 0.8004 | 0.8039 | 0.7347 | 0.7824 |
| 623 | cg18364088 | 0.6142 | 0.7696 | 0.8039 | 0.7923 | 0.7857 | 0.6742 | 0.6662 | 0.7830 | 0.7728 | 0.7819 | 0.7666 | 0.7231 | 0.7201 | 0.6937 |
| 624 | cg18370979 | 0.6067 | 0.7923 | 0.8561 | 0.8259 | 0.8332 | 0.6516 | 0.6800 | 0.8260 | 0.8117 | 0.8309 | 0.8307 | 0.8198 | 0.7500 | 0.7984 |
| 625 | cg18397653 | 0.6168 | 0.7602 | 0.7981 | 0.7716 | 0.7906 | 0.6743 | 0.6686 | 0.7832 | 0.7851 | 0.7863 | 0.7781 | 0.7469 | 0.7342 | 0.6960 |
| 626 | cg18412984 | 0.6867 | 0.8105 | 0.8617 | 0.8191 | 0.8498 | 0.6572 | 0.7011 | 0.8133 | 0.7750 | 0.8231 | 0.8386 | 0.8152 | 0.8204 | 0.7870 |
| 627 | cg18437633 | 0.6904 | 0.8250 | 0.8730 | 0.8468 | 0.8496 | 0.6924 | 0.6994 | 0.8264 | 0.8356 | 0.8442 | 0.8281 | 0.8149 | 0.7810 | 0.7813 |
| 628 | cg18459342 | 0.1588 | 0.2844 | 0.3930 | 0.3341 | 0.3569 | 0.1655 | 0.1590 | 0.2846 | 0.3122 | 0.3180 | 0.3197 | 0.3086 | 0.3332 | 0.2842 |
| 629 | cg18499731 | 0.6027 | 0.7912 | 0.7973 | 0.7633 | 0.7848 | 0.7058 | 0.6910 | 0.7748 | 0.7622 | 0.7956 | 0.7625 | 0.7521 | 0.7561 | 0.7356 |
| 630 | cg18582689 | 0.4178 | 0.6337 | 0.6680 | 0.6738 | 0.6848 | 0.5280 | 0.5000 | 0.6189 | 0.6453 | 0.6466 | 0.6734 | 0.6617 | 0.6316 | 0.6321 |
| 631 | cg18632631 | 0.5802 | 0.5637 | 0.7200 | 0.5743 | 0.6817 | 0.5614 | 0.5604 | 0.6565 | 0.6541 | 0.7016 | 0.5662 | 0.6553 | 0.7215 | 0.6662 |
| 632 | cg18715868 | 0.1843 | 0.1887 | 0.1236 | 0.1295 | 0.1365 | 0.1966 | 0.2214 | 0.1231 | 0.1613 | 0.1276 | 0.1509 | 0.1367 | 0.1929 | 0.1681 |
| 633 | cg18766912 | 0.1271 | 0.2007 | 0.1770 | 0.2396 | 0.1422 | 0.1113 | 0.2286 | 0.2789 | 0.2775 | 0.1659 | 0.1583 | 0.1103 | 0.1606 | 0.1225 |
| 634 | cg18768283 | 0.6339 | 0.7338 | 0.7849 | 0.7715 | 0.7625 | 0.6333 | 0.5799 | 0.7269 | 0.7152 | 0.7490 | 0.7579 | 0.7625 | 0.6842 | 0.7065 |
| 635 | cg18771300 | 0.3023 | 0.5479 | 0.7513 | 0.2357 | 0.7913 | 0.6734 | 0.4228 | 0.7659 | 0.5241 | 0.4974 | 0.5822 | 0.8097 | 0.3286 | 0.7537 |
| 636 | cg18806365 | 0.2874 | 0.3738 | 0.3765 | 0.3573 | 0.3546 | 0.2204 | 0.2719 | 0.3559 | 0.3116 | 0.2738 | 0.2752 | 0.3970 | 0.4388 | 0.3338 |
| 637 | cg18862260 | 0.5820 | 0.7501 | 0.7975 | 0.7870 | 0.7993 | 0.6492 | 0.6342 | 0.7637 | 0.7159 | 0.7645 | 0.7729 | 0.7596 | 0.7259 | 0.7295 |
| 638 | cg18876189 | 0.7122 | 0.8339 | 0.8568 | 0.8527 | 0.8790 | 0.7121 | 0.7307 | 0.8432 | 0.8349 | 0.8650 | 0.8685 | 0.8272 | 0.8269 | 0.8388 |
| 639 | cg18879041 | 0.5868 | 0.7398 | 0.7113 | 0.7338 | 0.7676 | 0.6238 | 0.6249 | 0.7230 | 0.7138 | 0.7581 | 0.7010 | 0.7075 | 0.7121 | 0.7776 |
| 640 | cg18885346 | 0.7052 | 0.7675 | 0.8311 | 0.7675 | 0.7952 | 0.7230 | 0.7818 | 0.8105 | 0.6891 | 0.7799 | 0.8397 | 0.7587 | 0.6744 | 0.7609 |
| 641 | cg18887228 | 0.6912 | 0.8221 | 0.8852 | 0.8611 | 0.8499 | 0.7329 | 0.6951 | 0.8521 | 0.8441 | 0.8512 | 0.8584 | 0.8109 | 0.8056 | 0.8033 |
| 642 | cg18901940 | 0.6706 | 0.7578 | 0.8218 | 0.7835 | 0.8297 | 0.6530 | 0.6679 | 0.8152 | 0.7844 | 0.8326 | 0.8261 | 0.8266 | 0.7889 | 0.7719 |
| 643 | cg18979762 | 0.6295 | 0.7910 | 0.8532 | 0.8234 | 0.8200 | 0.6626 | 0.6707 | 0.8054 | 0.7896 | 0.8160 | 0.8064 | 0.8055 | 0.8015 | 0.7940 |
| 644 | cg18999668 | 0.6999 | 0.7744 | 0.7929 | 0.8192 | 0.7832 | 0.7422 | 0.7248 | 0.7558 | 0.7974 | 0.8101 | 0.8016 | 0.7883 | 0.7333 | 0.7700 |
| 645 | cg19034028 | 0.5911 | 0.5023 | 0.5907 | 0.6090 | 0.6914 | 0.5248 | 0.5910 | 0.5740 | 0.6698 | 0.6183 | 0.6523 | 0.6180 | 0.6018 | 0.5931 |
| 646 | cg19058765 | 0.7527 | 0.8257 | 0.8612 | 0.8517 | 0.8499 | 0.7209 | 0.6888 | 0.8342 | 0.8204 | 0.8436 | 0.8399 | 0.8707 | 0.8197 | 0.8289 |
| 647 | cg19105504 | 0.7325 | 0.6421 | 0.6681 | 0.7469 | 0.7597 | 0.6649 | 0.6371 | 0.7321 | 0.6531 | 0.7508 | 0.7072 | 0.6991 | 0.6853 | 0.7183 |
| 648 | cg19110684 | 0.2509 | 0.1679 | 0.1174 | 0.1510 | 0.1301 | 0.2225 | 0.2085 | 0.1524 | 0.1755 | 0.1353 | 0.1294 | 0.1278 | 0.1687 | 0.1797 |
| 649 | cg19120125 | 0.5528 | 0.8076 | 0.8673 | 0.8208 | 0.8136 | 0.6359 | 0.6618 | 0.7890 | 0.8053 | 0.8389 | 0.8036 | 0.7952 | 0.7547 | 0.7898 |
| 650 | cg19139729 | 0.7290 | 0.7427 | 0.7707 | 0.7507 | 0.6973 | 0.7444 | 0.7049 | 0.7424 | 0.7381 | 0.7717 | 0.7864 | 0.7907 | 0.7472 | 0.7019 |
| 651 | cg19203504 | 0.2045 | 0.2757 | 0.2942 | 0.2741 | 0.2624 | 0.1844 | 0.1722 | 0.2668 | 0.2765 | 0.2562 | 0.2518 | 0.2585 | 0.2646 | 0.2515 |
| 652 | cg19242268 | 0.5029 | 0.4819 | 0.4830 | 0.4769 | 0.5531 | 0.4695 | 0.4955 | 0.3853 | 0.5175 | 0.5190 | 0.4537 | 0.5199 | 0.4776 | 0.4992 |
| 653 | cg19255783 | 0.1876 | 0.1104 | 0.0713 | 0.0939 | 0.0947 | 0.2218 | 0.1817 | 0.1083 | 0.1276 | 0.0809 | 0.1030 | 0.0973 | 0.1280 | 0.1325 |
| 654 | cg19399100 | 0.5301 | 0.7581 | 0.7633 | 0.7594 | 0.8154 | 0.6456 | 0.5977 | 0.7617 | 0.7503 | 0.8118 | 0.7676 | 0.7643 | 0.6806 | 0.7542 |

|     |            |        |        |        |        |        |        |        |        |        |        |        |        |        |        |
|-----|------------|--------|--------|--------|--------|--------|--------|--------|--------|--------|--------|--------|--------|--------|--------|
| 655 | cg19403023 | 0.5812 | 0.6384 | 0.5716 | 0.7157 | 0.6269 | 0.4044 | 0.5213 | 0.7478 | 0.5946 | 0.6532 | 0.6716 | 0.6449 | 0.6714 | 0.5933 |
| 656 | cg19404190 | 0.6808 | 0.7974 | 0.8282 | 0.8122 | 0.8223 | 0.7152 | 0.6945 | 0.8174 | 0.8015 | 0.8315 | 0.7873 | 0.7856 | 0.8096 | 0.7593 |
| 657 | cg19418958 | 0.5161 | 0.6737 | 0.6461 | 0.6629 | 0.6272 | 0.5476 | 0.4964 | 0.6503 | 0.6486 | 0.6541 | 0.6568 | 0.6026 | 0.5555 | 0.5571 |
| 658 | cg19428735 | 0.4965 | 0.6281 | 0.6801 | 0.6361 | 0.6366 | 0.4794 | 0.4729 | 0.6301 | 0.5828 | 0.6379 | 0.6647 | 0.6661 | 0.6112 | 0.5684 |
| 659 | cg19453250 | 0.4349 | 0.4009 | 0.5080 | 0.3792 | 0.3533 | 0.3055 | 0.2972 | 0.3161 | 0.4725 | 0.3945 | 0.3379 | 0.3448 | 0.4220 | 0.3362 |
| 660 | cg19510180 | 0.5108 | 0.6984 | 0.7607 | 0.7294 | 0.7278 | 0.5862 | 0.6002 | 0.7064 | 0.7363 | 0.7367 | 0.7166 | 0.6749 | 0.6944 | 0.6774 |
| 661 | cg19510604 | 0.8656 | 0.8503 | 0.8640 | 0.8612 | 0.8614 | 0.8571 | 0.8483 | 0.8598 | 0.8512 | 0.3789 | 0.8600 | 0.8604 | 0.8155 | 0.8139 |
| 662 | cg19560210 | 0.8239 | 0.8472 | 0.8777 | 0.8779 | 0.8843 | 0.7829 | 0.8082 | 0.8694 | 0.8708 | 0.8746 | 0.8593 | 0.8460 | 0.8396 | 0.8412 |
| 663 | cg19561186 | 0.5613 | 0.6900 | 0.7540 | 0.7267 | 0.7452 | 0.6033 | 0.6127 | 0.7176 | 0.6996 | 0.7419 | 0.6997 | 0.6991 | 0.6500 | 0.6946 |
| 664 | cg19612574 | 0.6816 | 0.8404 | 0.8772 | 0.8688 | 0.8639 | 0.8027 | 0.7577 | 0.8565 | 0.8485 | 0.8630 | 0.8494 | 0.8672 | 0.8113 | 0.8261 |
| 665 | cg19666391 | 0.5458 | 0.7043 | 0.7698 | 0.7453 | 0.7426 | 0.6202 | 0.6003 | 0.7421 | 0.7025 | 0.7277 | 0.7429 | 0.7014 | 0.7038 | 0.6937 |
| 666 | cg19682367 | 0.7370 | 0.7935 | 0.8115 | 0.8077 | 0.7835 | 0.7082 | 0.6749 | 0.8007 | 0.7895 | 0.8408 | 0.7789 | 0.7856 | 0.7109 | 0.7337 |
| 667 | cg19690404 | 0.6378 | 0.5981 | 0.6331 | 0.6592 | 0.6886 | 0.6578 | 0.5216 | 0.7252 | 0.6051 | 0.7174 | 0.6189 | 0.5326 | 0.6228 | 0.6625 |
| 668 | cg19740969 | 0.5143 | 0.7577 | 0.8108 | 0.7936 | 0.7944 | 0.6610 | 0.6289 | 0.6564 | 0.7876 | 0.7959 | 0.7897 | 0.7299 | 0.6331 | 0.7569 |
| 669 | cg19763281 | 0.7444 | 0.8214 | 0.8439 | 0.8368 | 0.8481 | 0.7056 | 0.7139 | 0.8100 | 0.7909 | 0.8384 | 0.8113 | 0.8333 | 0.7690 | 0.8259 |
| 670 | cg19766460 | 0.0471 | 0.0504 | 0.2053 | 0.0511 | 0.0527 | 0.1041 | 0.0600 | 0.0505 | 0.1242 | 0.2267 | 0.0545 | 0.1464 | 0.1509 | 0.0579 |
| 671 | cg19776090 | 0.3388 | 0.4688 | 0.5229 | 0.4582 | 0.5014 | 0.3761 | 0.3335 | 0.4366 | 0.4187 | 0.4777 | 0.4880 | 0.4782 | 0.4774 | 0.4658 |
| 672 | cg19782598 | 0.6827 | 0.8014 | 0.8531 | 0.8523 | 0.8233 | 0.7321 | 0.7149 | 0.8398 | 0.8108 | 0.8435 | 0.8493 | 0.8127 | 0.7768 | 0.8053 |
| 673 | cg19831575 | 0.0632 | 0.0482 | 0.0448 | 0.0417 | 0.0579 | 0.0622 | 0.0900 | 0.4350 | 0.0483 | 0.0445 | 0.4435 | 0.0696 | 0.0626 | 0.0438 |
| 674 | cg19884600 | 0.6423 | 0.8009 | 0.8353 | 0.8410 | 0.8089 | 0.7352 | 0.6978 | 0.8320 | 0.7991 | 0.7848 | 0.8143 | 0.8032 | 0.7641 | 0.7948 |
| 675 | cg19972859 | 0.0455 | 0.0565 | 0.0931 | 0.0407 | 0.0777 | 0.0797 | 0.0461 | 0.1383 | 0.0839 | 0.0596 | 0.0460 | 0.2481 | 0.0541 | 0.0615 |
| 676 | cg19984039 | 0.4339 | 0.6251 | 0.6724 | 0.6153 | 0.6039 | 0.4651 | 0.4701 | 0.6337 | 0.5928 | 0.6467 | 0.6403 | 0.5803 | 0.6061 | 0.6158 |
| 677 | cg20015689 | 0.5122 | 0.6084 | 0.5790 | 0.6497 | 0.6213 | 0.6230 | 0.5486 | 0.6165 | 0.6101 | 0.6399 | 0.5840 | 0.5526 | 0.5267 | 0.5910 |
| 678 | cg20025970 | 0.5722 | 0.6643 | 0.7115 | 0.7144 | 0.6745 | 0.5754 | 0.5664 | 0.6716 | 0.6602 | 0.6988 | 0.6818 | 0.6262 | 0.6581 | 0.6500 |
| 679 | cg20103550 | 0.5371 | 0.6767 | 0.7280 | 0.7195 | 0.7438 | 0.5885 | 0.5957 | 0.6798 | 0.6621 | 0.7138 | 0.7063 | 0.6729 | 0.6470 | 0.6467 |
| 680 | cg20118424 | 0.7182 | 0.8719 | 0.9103 | 0.8798 | 0.8771 | 0.7469 | 0.7391 | 0.8647 | 0.8663 | 0.8770 | 0.8863 | 0.8419 | 0.8258 | 0.8539 |
| 681 | cg20226593 | 0.5867 | 0.6841 | 0.7431 | 0.7286 | 0.7536 | 0.5629 | 0.5482 | 0.7407 | 0.7119 | 0.7318 | 0.7345 | 0.7114 | 0.7184 | 0.7039 |
| 682 | cg20234959 | 0.6531 | 0.7661 | 0.8309 | 0.7765 | 0.7907 | 0.6712 | 0.6338 | 0.7654 | 0.7829 | 0.7759 | 0.7746 | 0.7686 | 0.7540 | 0.7343 |
| 683 | cg20286200 | 0.1940 | 0.1395 | 0.1574 | 0.1537 | 0.1541 | 0.1383 | 0.1302 | 0.1455 | 0.1385 | 0.1429 | 0.1477 | 0.1952 | 0.1014 | 0.1229 |
| 684 | cg20427865 | 0.8021 | 0.7812 | 0.7977 | 0.8099 | 0.8305 | 0.7973 | 0.7796 | 0.8134 | 0.7842 | 0.8088 | 0.8219 | 0.8366 | 0.7773 | 0.7773 |
| 685 | cg20439022 | 0.0836 | 0.0315 | 0.0337 | 0.1458 | 0.0687 | 0.0321 | 0.0813 | 0.0452 | 0.0654 | 0.0344 | 0.0301 | 0.0703 | 0.0668 | 0.0431 |
| 686 | cg20449692 | 0.1760 | 0.0941 | 0.0590 | 0.0817 | 0.1003 | 0.0895 | 0.1403 | 0.1070 | 0.1307 | 0.1899 | 0.1498 | 0.1612 | 0.1748 | 0.0726 |
| 687 | cg20466180 | 0.2774 | 0.1336 | 0.0910 | 0.1115 | 0.1236 | 0.2293 | 0.2592 | 0.1217 | 0.1333 | 0.1122 | 0.1234 | 0.1335 | 0.1720 | 0.1413 |
| 688 | cg20507276 | 0.0444 | 0.0485 | 0.5577 | 0.2117 | 0.6462 | 0.3042 | 0.1535 | 0.0485 | 0.0978 | 0.0346 | 0.2333 | 0.3266 | 0.0491 | 0.2740 |
| 689 | cg20514617 | 0.5074 | 0.5581 | 0.4584 | 0.5588 | 0.6386 | 0.5282 | 0.5235 | 0.6049 | 0.5807 | 0.5412 | 0.6837 | 0.6503 | 0.6043 | 0.5311 |
| 690 | cg20540428 | 0.4060 | 0.7380 | 0.5935 | 0.5231 | 0.7779 | 0.5801 | 0.7293 | 0.5275 | 0.7412 | 0.2918 | 0.5084 | 0.7652 | 0.5507 | 0.5427 |
| 691 | cg20542190 | 0.4534 | 0.4236 | 0.4893 | 0.5473 | 0.5833 | 0.4061 | 0.5072 | 0.3782 | 0.5561 | 0.3929 | 0.4296 | 0.4316 | 0.4376 | 0.4896 |
| 692 | cg20630386 | 0.5184 | 0.6253 | 0.6716 | 0.6292 | 0.6721 | 0.5358 | 0.4810 | 0.6297 | 0.6307 | 0.6724 | 0.6244 | 0.6330 | 0.5648 | 0.5876 |
| 693 | cg20643416 | 0.4168 | 0.0420 | 0.1297 | 0.1294 | 0.0372 | 0.0375 | 0.0379 | 0.0370 | 0.0420 | 0.0397 | 0.0370 | 0.1085 | 0.0366 | 0.0522 |
| 694 | cg20773127 | 0.6501 | 0.5266 | 0.5785 | 0.6045 | 0.6875 | 0.5958 | 0.6354 | 0.6059 | 0.5842 | 0.5792 | 0.5187 | 0.6421 | 0.5836 | 0.5620 |
| 695 | cg20857253 | 0.4036 | 0.3100 | 0.4513 | 0.3443 | 0.3404 | 0.3113 | 0.3995 | 0.2992 | 0.3735 | 0.3350 | 0.3508 | 0.3865 | 0.3813 | 0.2557 |
| 696 | cg20887241 | 0.7512 | 0.7610 | 0.7512 | 0.7881 | 0.7722 | 0.7516 | 0.7676 | 0.7883 | 0.7019 | 0.8092 | 0.7681 | 0.7708 | 0.7410 | 0.7330 |
| 697 | cg20906802 | 0.6227 | 0.7754 | 0.8332 | 0.7929 | 0.7994 | 0.5838 | 0.6239 | 0.8066 | 0.7760 | 0.8090 | 0.8018 | 0.7931 | 0.7442 | 0.7613 |
| 698 | cg20924286 | 0.4376 | 0.3635 | 0.3677 | 0.3823 | 0.3938 | 0.3859 | 0.3917 | 0.3763 | 0.4263 | 0.4132 | 0.3804 | 0.3998 | 0.4493 | 0.4142 |
| 699 | cg20939319 | 0.5633 | 0.6614 | 0.6840 | 0.6935 | 0.6704 | 0.6257 | 0.5850 | 0.6601 | 0.6407 | 0.6832 | 0.6881 | 0.5285 | 0.5783 | 0.6593 |
| 700 | cg20945531 | 0.4004 | 0.8695 | 0.8757 | 0.4358 | 0.8930 | 0.8127 | 0.8278 | 0.4551 | 0.4563 | 0.9063 | 0.4246 | 0.8541 | 0.8696 | 0.4637 |
| 701 | cg20951539 | 0.6758 | 0.7656 | 0.7871 | 0.7569 | 0.7692 | 0.7035 | 0.6816 | 0.7884 | 0.7736 | 0.7710 | 0.7589 | 0.6463 | 0.7250 | 0.7352 |

|     |            |        |        |        |        |        |        |        |        |        |        |        |        |        |        |
|-----|------------|--------|--------|--------|--------|--------|--------|--------|--------|--------|--------|--------|--------|--------|--------|
| 702 | cg20980592 | 0.8169 | 0.9261 | 0.9485 | 0.9390 | 0.9298 | 0.8478 | 0.8588 | 0.9290 | 0.9262 | 0.9384 | 0.9352 | 0.9255 | 0.9019 | 0.9041 |
| 703 | cg20988616 | 0.6999 | 0.8242 | 0.8553 | 0.8438 | 0.8537 | 0.6998 | 0.6950 | 0.8451 | 0.8270 | 0.8484 | 0.8597 | 0.8217 | 0.8012 | 0.8128 |
| 704 | cg21010262 | 0.0511 | 0.0440 | 0.0433 | 0.4751 | 0.0518 | 0.0439 | 0.0580 | 0.0469 | 0.0538 | 0.0432 | 0.0515 | 0.0496 | 0.0617 | 0.0434 |
| 705 | cg21021629 | 0.6318 | 0.7886 | 0.8291 | 0.7996 | 0.8086 | 0.6887 | 0.6885 | 0.7945 | 0.7517 | 0.8071 | 0.8117 | 0.7543 | 0.7525 | 0.7834 |
| 706 | cg21022395 | 0.6367 | 0.7652 | 0.7801 | 0.7953 | 0.7981 | 0.7026 | 0.6665 | 0.8116 | 0.7517 | 0.7907 | 0.7383 | 0.7162 | 0.7429 | 0.7564 |
| 707 | cg21023114 | 0.7067 | 0.8418 | 0.8860 | 0.8674 | 0.8607 | 0.7563 | 0.7404 | 0.8569 | 0.8456 | 0.8649 | 0.8673 | 0.8546 | 0.8329 | 0.8552 |
| 708 | cg21039679 | 0.6898 | 0.7642 | 0.7453 | 0.7650 | 0.8374 | 0.8079 | 0.7424 | 0.7954 | 0.7465 | 0.8307 | 0.8102 | 0.7328 | 0.7298 | 0.7476 |
| 709 | cg21041127 | 0.5700 | 0.6861 | 0.7395 | 0.7094 | 0.7092 | 0.6096 | 0.5604 | 0.6751 | 0.6975 | 0.6951 | 0.6979 | 0.6534 | 0.6412 | 0.7067 |
| 710 | cg21084260 | 0.6934 | 0.7988 | 0.8103 | 0.7965 | 0.8087 | 0.6610 | 0.6854 | 0.8041 | 0.7431 | 0.8091 | 0.8043 | 0.7764 | 0.7438 | 0.7415 |
| 711 | cg21105318 | 0.6899 | 0.8225 | 0.8376 | 0.8301 | 0.7938 | 0.6905 | 0.6608 | 0.8373 | 0.7892 | 0.7987 | 0.7932 | 0.7889 | 0.7746 | 0.7863 |
| 712 | cg21142398 | 0.8019 | 0.8461 | 0.8736 | 0.8842 | 0.8722 | 0.7621 | 0.7311 | 0.8614 | 0.8405 | 0.8710 | 0.8869 | 0.7511 | 0.8149 | 0.8575 |
| 713 | cg21168622 | 0.3110 | 0.2627 | 0.1883 | 0.2069 | 0.2413 | 0.3104 | 0.3351 | 0.2370 | 0.2418 | 0.2450 | 0.2214 | 0.2135 | 0.2640 | 0.2437 |
| 714 | cg21169285 | 0.7616 | 0.8302 | 0.8731 | 0.8526 | 0.8695 | 0.7475 | 0.7214 | 0.8512 | 0.8374 | 0.8658 | 0.8517 | 0.8210 | 0.8007 | 0.7786 |
| 715 | cg21194776 | 0.6886 | 0.8056 | 0.8231 | 0.8040 | 0.8190 | 0.6949 | 0.6930 | 0.8264 | 0.7923 | 0.8187 | 0.8235 | 0.7974 | 0.7457 | 0.7450 |
| 716 | cg21201572 | 0.6479 | 0.7815 | 0.8170 | 0.8015 | 0.8085 | 0.6883 | 0.6499 | 0.7974 | 0.7756 | 0.8155 | 0.7591 | 0.7900 | 0.7590 | 0.7789 |
| 717 | cg21270015 | 0.6713 | 0.8461 | 0.8922 | 0.8425 | 0.8749 | 0.6774 | 0.7195 | 0.8395 | 0.8493 | 0.8489 | 0.8613 | 0.8347 | 0.8352 | 0.8448 |
| 718 | cg21405195 | 0.7904 | 0.8347 | 0.8407 | 0.8493 | 0.8688 | 0.7729 | 0.7878 | 0.8461 | 0.8349 | 0.8517 | 0.8662 | 0.8097 | 0.8080 | 0.7906 |
| 719 | cg21409833 | 0.5942 | 0.7709 | 0.8604 | 0.8205 | 0.8208 | 0.6502 | 0.6464 | 0.7939 | 0.7817 | 0.7892 | 0.7929 | 0.7868 | 0.7590 | 0.7761 |
| 720 | cg21431536 | 0.5571 | 0.7469 | 0.8199 | 0.7998 | 0.7840 | 0.6300 | 0.5815 | 0.7934 | 0.7603 | 0.7870 | 0.7865 | 0.7212 | 0.6981 | 0.7713 |
| 721 | cg21450627 | 0.8141 | 0.8083 | 0.8159 | 0.8424 | 0.8319 | 0.8012 | 0.8122 | 0.8170 | 0.8320 | 0.8432 | 0.8102 | 0.8429 | 0.8087 | 0.8155 |
| 722 | cg21457147 | 0.7322 | 0.8472 | 0.8915 | 0.8388 | 0.8520 | 0.7869 | 0.7494 | 0.8387 | 0.8472 | 0.8554 | 0.8569 | 0.8671 | 0.8295 | 0.8274 |
| 723 | cg21474838 | 0.6233 | 0.7110 | 0.7797 | 0.7616 | 0.7424 | 0.6887 | 0.6290 | 0.7901 | 0.7231 | 0.7441 | 0.7406 | 0.7232 | 0.6775 | 0.7150 |
| 724 | cg21621204 | 0.5782 | 0.7475 | 0.7901 | 0.7594 | 0.7591 | 0.6026 | 0.6157 | 0.7423 | 0.7611 | 0.7940 | 0.8047 | 0.7521 | 0.7258 | 0.7292 |
| 725 | cg21631409 | 0.6106 | 0.6918 | 0.6574 | 0.6640 | 0.7008 | 0.6165 | 0.6004 | 0.7176 | 0.6411 | 0.6924 | 0.5896 | 0.6355 | 0.5782 | 0.6778 |
| 726 | cg21642649 | 0.0994 | 0.0568 | 0.0730 | 0.0747 | 0.0727 | 0.0831 | 0.0831 | 0.0757 | 0.0773 | 0.0750 | 0.0692 | 0.0702 | 0.0824 | 0.0777 |
| 727 | cg21643191 | 0.6644 | 0.7906 | 0.8320 | 0.8145 | 0.8185 | 0.7491 | 0.6815 | 0.8134 | 0.7864 | 0.8371 | 0.8009 | 0.8040 | 0.7730 | 0.7712 |
| 728 | cg21649520 | 0.6153 | 0.7425 | 0.8002 | 0.7632 | 0.7730 | 0.6104 | 0.6560 | 0.7472 | 0.7157 | 0.7689 | 0.7503 | 0.7424 | 0.6969 | 0.7407 |
| 729 | cg21660727 | 0.0808 | 0.2316 | 0.2478 | 0.2425 | 0.2430 | 0.0889 | 0.0809 | 0.0876 | 0.0973 | 0.0775 | 0.0929 | 0.0934 | 0.0857 | 0.2377 |
| 730 | cg21717724 | 0.5892 | 0.6008 | 0.7833 | 0.8850 | 0.6350 | 0.4941 | 0.6629 | 0.6054 | 0.8344 | 0.6359 | 0.8792 | 0.3391 | 0.6104 | 0.6266 |
| 731 | cg21727574 | 0.7774 | 0.8593 | 0.8846 | 0.8609 | 0.8651 | 0.7229 | 0.7367 | 0.8492 | 0.8486 | 0.8802 | 0.8652 | 0.8204 | 0.8175 | 0.8067 |
| 732 | cg21736205 | 0.8009 | 0.8581 | 0.8991 | 0.8678 | 0.8760 | 0.7792 | 0.7551 | 0.8643 | 0.8544 | 0.8854 | 0.8795 | 0.8568 | 0.7986 | 0.8362 |
| 733 | cg21743649 | 0.9061 | 0.9130 | 0.9147 | 0.9230 | 0.5539 | 0.9164 | 0.9101 | 0.9143 | 0.9173 | 0.9291 | 0.9266 | 0.9021 | 0.9116 | 0.9334 |
| 734 | cg21750887 | 0.5835 | 0.6016 | 0.6457 | 0.6166 | 0.6040 | 0.5306 | 0.5155 | 0.5745 | 0.6237 | 0.5772 | 0.5181 | 0.6124 | 0.5818 | 0.6307 |
| 735 | cg21804950 | 0.2841 | 0.4735 | 0.3502 | 0.3093 | 0.4614 | 0.3380 | 0.2129 | 0.3764 | 0.2819 | 0.3673 | 0.2918 | 0.3316 | 0.2402 | 0.3660 |
| 736 | cg21929875 | 0.9035 | 0.9220 | 0.8844 | 0.8931 | 0.9230 | 0.6929 | 0.8453 | 0.8335 | 0.8725 | 0.8724 | 0.8847 | 0.9057 | 0.8776 | 0.8045 |
| 737 | cg22024657 | 0.6988 | 0.8333 | 0.8867 | 0.8414 | 0.8613 | 0.7542 | 0.7137 | 0.8529 | 0.8344 | 0.8564 | 0.8442 | 0.8596 | 0.7701 | 0.8105 |
| 738 | cg22051636 | 0.5893 | 0.6070 | 0.1086 | 0.6072 | 0.1528 | 0.3493 | 0.4163 | 0.6088 | 0.4426 | 0.6574 | 0.1031 | 0.5036 | 0.3264 | 0.5751 |
| 739 | cg22064451 | 0.5547 | 0.6574 | 0.6835 | 0.6729 | 0.6680 | 0.5230 | 0.5743 | 0.6585 | 0.6407 | 0.6937 | 0.6469 | 0.6412 | 0.6242 | 0.6487 |
| 740 | cg22066521 | 0.5708 | 0.7091 | 0.8044 | 0.7368 | 0.7787 | 0.6087 | 0.5850 | 0.7239 | 0.7554 | 0.7567 | 0.7407 | 0.7305 | 0.7217 | 0.7248 |
| 741 | cg22074858 | 0.2148 | 0.1576 | 0.0786 | 0.0995 | 0.1009 | 0.2148 | 0.1995 | 0.1157 | 0.1350 | 0.0834 | 0.1033 | 0.0925 | 0.1481 | 0.1448 |
| 742 | cg22152192 | 0.6899 | 0.8078 | 0.8164 | 0.8074 | 0.8155 | 0.7059 | 0.6935 | 0.7843 | 0.7787 | 0.8107 | 0.8068 | 0.7637 | 0.7278 | 0.7822 |
| 743 | cg22228134 | 0.7498 | 0.8366 | 0.8477 | 0.8674 | 0.8727 | 0.7971 | 0.8111 | 0.8686 | 0.8200 | 0.8545 | 0.8222 | 0.7651 | 0.8315 | 0.8048 |
| 744 | cg22324153 | 0.6819 | 0.7789 | 0.8319 | 0.8052 | 0.8183 | 0.7133 | 0.7151 | 0.8066 | 0.7947 | 0.8207 | 0.8344 | 0.8069 | 0.7768 | 0.7462 |
| 745 | cg22367970 | 0.2244 | 0.2007 | 0.1380 | 0.1663 | 0.1693 | 0.2583 | 0.2239 | 0.1562 | 0.1771 | 0.1585 | 0.1847 | 0.1945 | 0.1601 | 0.1648 |
| 746 | cg22373097 | 0.6863 | 0.8040 | 0.8224 | 0.8544 | 0.8434 | 0.7342 | 0.5488 | 0.8336 | 0.8132 | 0.8555 | 0.8405 | 0.8183 | 0.7682 | 0.8121 |
| 747 | cg22392708 | 0.2699 | 0.2956 | 0.2903 | 0.3068 | 0.3429 | 0.3036 | 0.2650 | 0.3380 | 0.3317 | 0.3473 | 0.2953 | 0.2634 | 0.2964 | 0.3063 |
| 748 | cg22419732 | 0.6360 | 0.7655 | 0.8129 | 0.7663 | 0.7652 | 0.6535 | 0.6277 | 0.7870 | 0.7439 | 0.8062 | 0.7797 | 0.7284 | 0.7206 | 0.7676 |

|     |            |        |        |        |        |        |        |        |        |        |        |        |        |        |        |
|-----|------------|--------|--------|--------|--------|--------|--------|--------|--------|--------|--------|--------|--------|--------|--------|
| 749 | cg22427279 | 0.4185 | 0.5483 | 0.6706 | 0.6266 | 0.6184 | 0.4714 | 0.4537 | 0.4031 | 0.5602 | 0.6243 | 0.6292 | 0.6014 | 0.5960 | 0.6152 |
| 750 | cg22432908 | 0.5391 | 0.7838 | 0.8319 | 0.7452 | 0.8069 | 0.5901 | 0.6378 | 0.6805 | 0.7064 | 0.8234 | 0.8019 | 0.6939 | 0.7619 | 0.7174 |
| 751 | cg22487322 | 0.8511 | 0.8989 | 0.9347 | 0.9218 | 0.9372 | 0.8644 | 0.8789 | 0.9225 | 0.9123 | 0.9243 | 0.9395 | 0.9122 | 0.9068 | 0.8887 |
| 752 | cg22506453 | 0.6912 | 0.8271 | 0.8488 | 0.8157 | 0.8456 | 0.7206 | 0.6993 | 0.8407 | 0.8083 | 0.8465 | 0.8360 | 0.7870 | 0.8024 | 0.8345 |
| 753 | cg22568695 | 0.5645 | 0.7607 | 0.8632 | 0.7936 | 0.8251 | 0.6325 | 0.6643 | 0.7910 | 0.8039 | 0.7942 | 0.8003 | 0.7767 | 0.7732 | 0.7611 |
| 754 | cg22586527 | 0.4943 | 0.6538 | 0.6681 | 0.6499 | 0.6325 | 0.5292 | 0.5469 | 0.6557 | 0.6162 | 0.6556 | 0.6644 | 0.5943 | 0.6223 | 0.6258 |
| 755 | cg22598744 | 0.8380 | 0.8615 | 0.8698 | 0.8728 | 0.8853 | 0.7901 | 0.7733 | 0.8761 | 0.8516 | 0.8969 | 0.8774 | 0.8602 | 0.8138 | 0.8175 |
| 756 | cg22628694 | 0.7886 | 0.8519 | 0.8954 | 0.8801 | 0.8831 | 0.7764 | 0.7573 | 0.8651 | 0.8494 | 0.8771 | 0.8822 | 0.8935 | 0.8450 | 0.8628 |
| 757 | cg22679120 | 0.5703 | 0.6426 | 0.6212 | 0.5900 | 0.6356 | 0.5793 | 0.5727 | 0.6523 | 0.6484 | 0.6259 | 0.6537 | 0.5831 | 0.6218 | 0.6291 |
| 758 | cg22699362 | 0.4485 | 0.7716 | 0.8173 | 0.8106 | 0.8231 | 0.7502 | 0.7096 | 0.7887 | 0.7680 | 0.7666 | 0.7219 | 0.7860 | 0.6410 | 0.7355 |
| 759 | cg22726338 | 0.5888 | 0.7294 | 0.7709 | 0.7240 | 0.6944 | 0.6069 | 0.5569 | 0.7188 | 0.7066 | 0.7283 | 0.7127 | 0.6753 | 0.6811 | 0.7157 |
| 760 | cg22730560 | 0.3108 | 0.4422 | 0.4992 | 0.4922 | 0.4744 | 0.3448 | 0.3475 | 0.4665 | 0.4621 | 0.4551 | 0.4817 | 0.4717 | 0.4427 | 0.4239 |
| 761 | cg22730830 | 0.8440 | 0.4901 | 0.7312 | 0.7090 | 0.5562 | 0.6568 | 0.6856 | 0.7160 | 0.7834 | 0.6619 | 0.7716 | 0.5908 | 0.7337 | 0.7032 |
| 762 | cg22778145 | 0.4018 | 0.3468 | 0.3860 | 0.2943 | 0.3460 | 0.2835 | 0.3591 | 0.4033 | 0.3735 | 0.3940 | 0.3700 | 0.3561 | 0.3824 | 0.3167 |
| 763 | cg22783258 | 0.6929 | 0.8174 | 0.8501 | 0.8250 | 0.8300 | 0.7436 | 0.7137 | 0.8317 | 0.8019 | 0.8394 | 0.8309 | 0.7734 | 0.7950 | 0.8226 |
| 764 | cg22833175 | 0.6960 | 0.7508 | 0.7891 | 0.7901 | 0.7675 | 0.7064 | 0.6954 | 0.7451 | 0.7583 | 0.7583 | 0.7294 | 0.7467 | 0.7326 | 0.7704 |
| 765 | cg22836132 | 0.5995 | 0.7595 | 0.8305 | 0.7999 | 0.8131 | 0.6169 | 0.6334 | 0.7898 | 0.7896 | 0.7878 | 0.7977 | 0.7776 | 0.7416 | 0.7754 |
| 766 | cg22940988 | 0.6895 | 0.7348 | 0.8015 | 0.7644 | 0.7477 | 0.6761 | 0.6621 | 0.7679 | 0.7631 | 0.7764 | 0.7518 | 0.7382 | 0.6363 | 0.6923 |
| 767 | cg23001457 | 0.6653 | 0.6792 | 0.6156 | 0.6582 | 0.6452 | 0.6545 | 0.6501 | 0.6698 | 0.6505 | 0.6800 | 0.6789 | 0.6563 | 0.5053 | 0.5253 |
| 768 | cg23126947 | 0.6457 | 0.7814 | 0.8329 | 0.7893 | 0.8026 | 0.6626 | 0.6858 | 0.7879 | 0.7862 | 0.8055 | 0.8186 | 0.7734 | 0.7702 | 0.7411 |
| 769 | cg23154064 | 0.6880 | 0.7276 | 0.7508 | 0.7296 | 0.7411 | 0.6495 | 0.6146 | 0.7412 | 0.7287 | 0.7409 | 0.6851 | 0.7237 | 0.7849 | 0.8041 |
| 770 | cg23163573 | 0.5148 | 0.5159 | 0.6580 | 0.6470 | 0.5559 | 0.6164 | 0.4451 | 0.5493 | 0.5301 | 0.5235 | 0.6393 | 0.6468 | 0.4070 | 0.4075 |
| 771 | cg23183296 | 0.5789 | 0.7709 | 0.7796 | 0.6842 | 0.7134 | 0.5270 | 0.5518 | 0.7432 | 0.7637 | 0.4397 | 0.7694 | 0.7575 | 0.7402 | 0.7125 |
| 772 | cg23196557 | 0.4823 | 0.6568 | 0.6791 | 0.6826 | 0.6377 | 0.5481 | 0.5546 | 0.6915 | 0.6475 | 0.7097 | 0.6555 | 0.5840 | 0.6686 | 0.6849 |
| 773 | cg23205183 | 0.5978 | 0.7053 | 0.7891 | 0.7206 | 0.7821 | 0.6356 | 0.6298 | 0.7158 | 0.7228 | 0.7718 | 0.7639 | 0.7354 | 0.7175 | 0.7037 |
| 774 | cg23254045 | 0.6082 | 0.7260 | 0.7313 | 0.7542 | 0.7649 | 0.6675 | 0.6206 | 0.7119 | 0.7045 | 0.7621 | 0.7344 | 0.6794 | 0.7401 | 0.6999 |
| 775 | cg23256150 | 0.7390 | 0.7821 | 0.7901 | 0.7518 | 0.8028 | 0.7324 | 0.6722 | 0.7925 | 0.7672 | 0.7848 | 0.7715 | 0.7356 | 0.7394 | 0.7921 |
| 776 | cg23264413 | 0.8076 | 0.5925 | 0.7625 | 0.6009 | 0.7796 | 0.4290 | 0.7382 | 0.3980 | 0.6064 | 0.7827 | 0.4817 | 0.7252 | 0.7137 | 0.4909 |
| 777 | cg23322523 | 0.6987 | 0.7805 | 0.7290 | 0.7138 | 0.7551 | 0.7326 | 0.6699 | 0.7542 | 0.7321 | 0.7583 | 0.7291 | 0.6989 | 0.6686 | 0.6725 |
| 778 | cg23328124 | 0.7108 | 0.8040 | 0.8203 | 0.8064 | 0.8193 | 0.6650 | 0.6964 | 0.7903 | 0.7774 | 0.8183 | 0.7924 | 0.8104 | 0.7661 | 0.7993 |
| 779 | cg23523368 | 0.7221 | 0.8051 | 0.8612 | 0.8434 | 0.8548 | 0.7151 | 0.7474 | 0.8478 | 0.8362 | 0.8541 | 0.8461 | 0.8003 | 0.7904 | 0.8182 |
| 780 | cg23540745 | 0.8127 | 0.8365 | 0.8379 | 0.8298 | 0.8475 | 0.8088 | 0.7916 | 0.8178 | 0.8070 | 0.8439 | 0.8380 | 0.7883 | 0.8406 | 0.8730 |
| 781 | cg23588759 | 0.6638 | 0.7827 | 0.8207 | 0.7949 | 0.7733 | 0.7250 | 0.7000 | 0.7838 | 0.7932 | 0.7963 | 0.7799 | 0.7635 | 0.7631 | 0.7392 |
| 782 | cg23679141 | 0.0987 | 0.2378 | 0.3353 | 0.2241 | 0.2621 | 0.1389 | 0.1438 | 0.2295 | 0.2168 | 0.2500 | 0.2598 | 0.2330 | 0.2369 | 0.2659 |
| 783 | cg23683201 | 0.7286 | 0.8336 | 0.8310 | 0.8519 | 0.8348 | 0.7558 | 0.7193 | 0.8331 | 0.8292 | 0.8459 | 0.8378 | 0.8156 | 0.7929 | 0.8116 |
| 784 | cg23719367 | 0.6919 | 0.8295 | 0.8582 | 0.8380 | 0.8475 | 0.7247 | 0.7095 | 0.8078 | 0.8132 | 0.8278 | 0.8535 | 0.8174 | 0.7647 | 0.8307 |
| 785 | cg23855121 | 0.7216 | 0.7256 | 0.7640 | 0.7760 | 0.7775 | 0.7389 | 0.7214 | 0.7750 | 0.7574 | 0.7598 | 0.7886 | 0.7375 | 0.6816 | 0.6950 |
| 786 | cg23855818 | 0.6523 | 0.6936 | 0.7653 | 0.7243 | 0.7364 | 0.6669 | 0.6115 | 0.7587 | 0.7189 | 0.7164 | 0.6837 | 0.7457 | 0.6753 | 0.7152 |
| 787 | cg23873703 | 0.7507 | 0.6621 | 0.6258 | 0.7222 | 0.7682 | 0.6042 | 0.7131 | 0.7281 | 0.6884 | 0.7248 | 0.7461 | 0.7087 | 0.7765 | 0.7163 |
| 788 | cg23887102 | 0.6879 | 0.8353 | 0.8607 | 0.8327 | 0.8377 | 0.7349 | 0.7434 | 0.8356 | 0.8316 | 0.8440 | 0.8311 | 0.7741 | 0.8068 | 0.8129 |
| 789 | cg23953831 | 0.2314 | 0.0777 | 0.0662 | 0.0879 | 0.0841 | 0.1142 | 0.1237 | 0.0758 | 0.0868 | 0.0827 | 0.0817 | 0.0992 | 0.2519 | 0.5219 |
| 790 | cg24076830 | 0.6275 | 0.8263 | 0.8636 | 0.8375 | 0.8417 | 0.7164 | 0.6876 | 0.8216 | 0.8276 | 0.8451 | 0.8514 | 0.8369 | 0.8338 | 0.8210 |
| 791 | cg24116886 | 0.7320 | 0.8375 | 0.8656 | 0.8622 | 0.8669 | 0.7816 | 0.7693 | 0.8514 | 0.8464 | 0.8696 | 0.8709 | 0.8299 | 0.8069 | 0.8559 |
| 792 | cg24167928 | 0.7579 | 0.8576 | 0.8894 | 0.8724 | 0.8670 | 0.7806 | 0.7556 | 0.8826 | 0.8455 | 0.8611 | 0.8757 | 0.8209 | 0.8590 | 0.8492 |
| 793 | cg24202119 | 0.6575 | 0.6163 | 0.5988 | 0.6328 | 0.6709 | 0.4805 | 0.5541 | 0.6279 | 0.5797 | 0.6280 | 0.6207 | 0.5673 | 0.5790 | 0.5682 |
| 794 | cg24210717 | 0.6440 | 0.6911 | 0.7132 | 0.7230 | 0.7359 | 0.6932 | 0.6832 | 0.6386 | 0.7130 | 0.6857 | 0.6872 | 0.6863 | 0.6723 | 0.6506 |
| 795 | cg24243265 | 0.6667 | 0.8280 | 0.8607 | 0.8549 | 0.8659 | 0.7482 | 0.7509 | 0.8383 | 0.8475 | 0.8453 | 0.8323 | 0.8499 | 0.8142 | 0.8447 |

|     |            |        |        |        |        |        |        |        |        |        |        |        |        |        |        |
|-----|------------|--------|--------|--------|--------|--------|--------|--------|--------|--------|--------|--------|--------|--------|--------|
| 796 | cg24249775 | 0.6764 | 0.8366 | 0.8823 | 0.8491 | 0.8735 | 0.7013 | 0.7098 | 0.8455 | 0.8139 | 0.8619 | 0.8610 | 0.8502 | 0.8279 | 0.8212 |
| 797 | cg24333473 | 0.3875 | 0.4574 | 0.3932 | 0.3853 | 0.4508 | 0.2826 | 0.3064 | 0.3628 | 0.4110 | 0.3903 | 0.4202 | 0.4217 | 0.3919 | 0.3928 |
| 798 | cg24414383 | 0.6002 | 0.7842 | 0.8250 | 0.8072 | 0.7977 | 0.6865 | 0.6625 | 0.8002 | 0.7539 | 0.8279 | 0.8049 | 0.7708 | 0.7573 | 0.7368 |
| 799 | cg24426405 | 0.6012 | 0.7218 | 0.7494 | 0.7731 | 0.7625 | 0.6324 | 0.6279 | 0.7597 | 0.7028 | 0.7425 | 0.7206 | 0.7315 | 0.6987 | 0.6742 |
| 800 | cg24427660 | 0.5968 | 0.5287 | 0.4779 | 0.5607 | 0.6176 | 0.4767 | 0.6578 | 0.4819 | 0.5336 | 0.5803 | 0.5323 | 0.6598 | 0.5972 | 0.5398 |
| 801 | cg24450631 | 0.2115 | 0.3106 | 0.3539 | 0.3241 | 0.3346 | 0.1875 | 0.1712 | 0.2625 | 0.2791 | 0.2769 | 0.3226 | 0.3204 | 0.3083 | 0.3224 |
| 802 | cg24459209 | 0.7074 | 0.8431 | 0.7663 | 0.7966 | 0.8522 | 0.7399 | 0.7454 | 0.8404 | 0.8141 | 0.8367 | 0.7964 | 0.8559 | 0.7538 | 0.7767 |
| 803 | cg24469977 | 0.7569 | 0.8183 | 0.8618 | 0.8579 | 0.7219 | 0.7872 | 0.7071 | 0.8252 | 0.8194 | 0.8392 | 0.8517 | 0.8514 | 0.8259 | 0.7872 |
| 804 | cg24499411 | 0.7931 | 0.7395 | 0.7245 | 0.6938 | 0.8254 | 0.6394 | 0.6966 | 0.7417 | 0.7623 | 0.6891 | 0.7803 | 0.7855 | 0.7439 | 0.6774 |
| 805 | cg24556026 | 0.6049 | 0.5507 | 0.5599 | 0.6428 | 0.6746 | 0.5611 | 0.6567 | 0.5655 | 0.6223 | 0.6145 | 0.6306 | 0.6923 | 0.6396 | 0.6837 |
| 806 | cg24603941 | 0.7061 | 0.8059 | 0.8826 | 0.8353 | 0.8179 | 0.6650 | 0.7044 | 0.8069 | 0.7921 | 0.8288 | 0.8642 | 0.7006 | 0.8007 | 0.7749 |
| 807 | cg24648061 | 0.4805 | 0.6782 | 0.7205 | 0.7042 | 0.6900 | 0.4978 | 0.5637 | 0.6792 | 0.7063 | 0.7201 | 0.6617 | 0.6503 | 0.6492 | 0.6649 |
| 808 | cg24654547 | 0.0316 | 0.0439 | 0.0948 | 0.1014 | 0.0783 | 0.0998 | 0.0393 | 0.2207 | 0.1672 | 0.1994 | 0.0811 | 0.1095 | 0.0330 | 0.0426 |
| 809 | cg24655310 | 0.8697 | 0.6920 | 0.6222 | 0.4951 | 0.4639 | 0.4978 | 0.4951 | 0.7948 | 0.8439 | 0.7797 | 0.5215 | 0.8760 | 0.8602 | 0.7606 |
| 810 | cg24678320 | 0.8664 | 0.8361 | 0.8794 | 0.8516 | 0.8476 | 0.8751 | 0.8765 | 0.8504 | 0.8480 | 0.8498 | 0.8442 | 0.8897 | 0.8644 | 0.8188 |
| 811 | cg24735489 | 0.2730 | 0.3652 | 0.3641 | 0.4729 | 0.4607 | 0.3643 | 0.4177 | 0.4767 | 0.4180 | 0.4468 | 0.2288 | 0.4166 | 0.3997 | 0.4438 |
| 812 | cg24760768 | 0.8542 | 0.9202 | 0.9463 | 0.9164 | 0.9280 | 0.8693 | 0.8590 | 0.9163 | 0.9158 | 0.9313 | 0.9271 | 0.9229 | 0.8864 | 0.9044 |
| 813 | cg24776019 | 0.7113 | 0.8263 | 0.8480 | 0.8287 | 0.8585 | 0.7161 | 0.7321 | 0.8321 | 0.8234 | 0.8337 | 0.8316 | 0.8317 | 0.7864 | 0.7744 |
| 814 | cg24816298 | 0.7112 | 0.7878 | 0.8052 | 0.8232 | 0.7905 | 0.7127 | 0.7004 | 0.7963 | 0.7929 | 0.8124 | 0.8052 | 0.7455 | 0.7897 | 0.7732 |
| 815 | cg24820250 | 0.6493 | 0.8005 | 0.8452 | 0.8066 | 0.8155 | 0.6894 | 0.6762 | 0.8141 | 0.8109 | 0.8182 | 0.8270 | 0.8074 | 0.7546 | 0.7765 |
| 816 | cg24829483 | 0.7438 | 0.8540 | 0.8483 | 0.8433 | 0.8499 | 0.7550 | 0.7251 | 0.8629 | 0.8449 | 0.8378 | 0.8471 | 0.8592 | 0.7783 | 0.7983 |
| 817 | cg24831427 | 0.6752 | 0.6579 | 0.7652 | 0.7286 | 0.8099 | 0.6670 | 0.6363 | 0.7043 | 0.7838 | 0.7909 | 0.8021 | 0.7263 | 0.7167 | 0.7719 |
| 818 | cg24899750 | 0.6293 | 0.5698 | 0.6414 | 0.5862 | 0.6430 | 0.6138 | 0.5414 | 0.5803 | 0.6460 | 0.6289 | 0.6024 | 0.6000 | 0.6300 | 0.6343 |
| 819 | cg24949049 | 0.6633 | 0.8552 | 0.8864 | 0.8720 | 0.8854 | 0.7595 | 0.7803 | 0.8677 | 0.8718 | 0.8836 | 0.8714 | 0.8854 | 0.8218 | 0.8522 |
| 820 | cg24956866 | 0.6329 | 0.5227 | 0.5880 | 0.6672 | 0.6825 | 0.5080 | 0.5848 | 0.5900 | 0.5153 | 0.6100 | 0.6133 | 0.6122 | 0.6371 | 0.5350 |
| 821 | cg24999727 | 0.6708 | 0.8063 | 0.8421 | 0.8327 | 0.8312 | 0.7299 | 0.7079 | 0.8125 | 0.7903 | 0.8254 | 0.8260 | 0.8186 | 0.7739 | 0.7827 |
| 822 | cg25004981 | 0.8444 | 0.9473 | 0.8879 | 0.7080 | 0.9157 | 0.7453 | 0.8564 | 0.8408 | 0.9140 | 0.8632 | 0.7906 | 0.7663 | 0.8735 | 0.8769 |
| 823 | cg25032865 | 0.7354 | 0.7135 | 0.7981 | 0.7956 | 0.8025 | 0.7506 | 0.6694 | 0.8172 | 0.7812 | 0.7993 | 0.8063 | 0.7823 | 0.7366 | 0.7533 |
| 824 | cg25040282 | 0.5710 | 0.7424 | 0.7883 | 0.7861 | 0.7543 | 0.6521 | 0.6004 | 0.7431 | 0.7313 | 0.7502 | 0.7643 | 0.7195 | 0.7111 | 0.7096 |
| 825 | cg25106358 | 0.7496 | 0.8544 | 0.8802 | 0.8707 | 0.8795 | 0.7793 | 0.7782 | 0.8555 | 0.8564 | 0.8630 | 0.8695 | 0.8098 | 0.8372 | 0.8472 |
| 826 | cg25112853 | 0.7306 | 0.7227 | 0.7358 | 0.7252 | 0.7222 | 0.6187 | 0.6204 | 0.7010 | 0.7356 | 0.7474 | 0.7115 | 0.6961 | 0.7311 | 0.7329 |
| 827 | cg25133685 | 0.4741 | 0.6058 | 0.3711 | 0.3742 | 0.5387 | 0.3635 | 0.3566 | 0.3570 | 0.3717 | 0.3393 | 0.4155 | 0.4400 | 0.3811 | 0.4299 |
| 828 | cg25157408 | 0.6225 | 0.7870 | 0.8271 | 0.8028 | 0.8061 | 0.6790 | 0.6237 | 0.7708 | 0.7808 | 0.7919 | 0.8058 | 0.7590 | 0.7423 | 0.7715 |
| 829 | cg25159668 | 0.4967 | 0.7010 | 0.7666 | 0.7667 | 0.7246 | 0.5394 | 0.5409 | 0.7297 | 0.7058 | 0.7321 | 0.7484 | 0.7273 | 0.7073 | 0.7511 |
| 830 | cg25177139 | 0.8052 | 0.8643 | 0.8905 | 0.8802 | 0.8894 | 0.8123 | 0.7904 | 0.8928 | 0.8720 | 0.8732 | 0.8906 | 0.8718 | 0.8451 | 0.8676 |
| 831 | cg25217765 | 0.7689 | 0.8331 | 0.8283 | 0.8397 | 0.8732 | 0.7595 | 0.7352 | 0.8415 | 0.8477 | 0.8560 | 0.8766 | 0.8358 | 0.8039 | 0.7751 |
| 832 | cg25375711 | 0.0402 | 0.0390 | 0.0335 | 0.0318 | 0.0288 | 0.0401 | 0.0379 | 0.0321 | 0.0426 | 0.0300 | 0.0324 | 0.1060 | 0.0474 | 0.0478 |
| 833 | cg25397076 | 0.0392 | 0.0279 | 0.0331 | 0.0288 | 0.0281 | 0.0328 | 0.0307 | 0.0256 | 0.0275 | 0.0290 | 0.0314 | 0.0428 | 0.0386 | 0.0384 |
| 834 | cg25414165 | 0.6789 | 0.6694 | 0.7801 | 0.6941 | 0.7362 | 0.6502 | 0.6744 | 0.7498 | 0.6389 | 0.6920 | 0.6184 | 0.7686 | 0.7043 | 0.7418 |
| 835 | cg25427580 | 0.7939 | 0.9053 | 0.9166 | 0.8878 | 0.9182 | 0.8280 | 0.8333 | 0.8873 | 0.8790 | 0.8982 | 0.9040 | 0.9013 | 0.8608 | 0.8585 |
| 836 | cg25427638 | 0.8691 | 0.8383 | 0.8378 | 0.8389 | 0.8626 | 0.8318 | 0.6339 | 0.8280 | 0.8429 | 0.8177 | 0.8463 | 0.8643 | 0.8386 | 0.8374 |
| 837 | cg25463135 | 0.6989 | 0.8261 | 0.8728 | 0.8479 | 0.8507 | 0.6917 | 0.7128 | 0.8151 | 0.8256 | 0.8055 | 0.8518 | 0.8383 | 0.8007 | 0.6840 |
| 838 | cg25463409 | 0.6620 | 0.7501 | 0.8111 | 0.7640 | 0.7815 | 0.6283 | 0.6413 | 0.7565 | 0.7371 | 0.7993 | 0.7907 | 0.7300 | 0.6794 | 0.6953 |
| 839 | cg25494064 | 0.7227 | 0.7695 | 0.8140 | 0.7946 | 0.8031 | 0.7297 | 0.6703 | 0.7976 | 0.7798 | 0.7835 | 0.7912 | 0.7516 | 0.7468 | 0.7924 |
| 840 | cg25500444 | 0.1829 | 0.1428 | 0.2568 | 0.1553 | 0.2283 | 0.1814 | 0.1748 | 0.1813 | 0.1942 | 0.2149 | 0.2211 | 0.1558 | 0.2271 | 0.1980 |
| 841 | cg25567232 | 0.7540 | 0.8303 | 0.8428 | 0.8367 | 0.8378 | 0.7705 | 0.7225 | 0.8362 | 0.8060 | 0.8395 | 0.8620 | 0.8119 | 0.7877 | 0.7876 |
| 842 | cg25569462 | 0.2621 | 0.8668 | 0.6745 | 0.8895 | 0.8831 | 0.8456 | 0.8139 | 0.7273 | 0.8721 | 0.6547 | 0.8837 | 0.6339 | 0.8646 | 0.8577 |

|     |            |        |        |        |        |        |        |        |        |        |        |        |        |        |        |
|-----|------------|--------|--------|--------|--------|--------|--------|--------|--------|--------|--------|--------|--------|--------|--------|
| 843 | cg25575065 | 0.0620 | 0.2042 | 0.0772 | 0.1216 | 0.0982 | 0.0987 | 0.0916 | 0.1314 | 0.1364 | 0.1211 | 0.0896 | 0.0845 | 0.1025 | 0.2254 |
| 844 | cg25600236 | 0.4788 | 0.6669 | 0.7329 | 0.6620 | 0.6874 | 0.5243 | 0.5651 | 0.6597 | 0.6495 | 0.7373 | 0.7024 | 0.6674 | 0.6324 | 0.5914 |
| 845 | cg25608949 | 0.7244 | 0.7707 | 0.8147 | 0.7678 | 0.7919 | 0.6889 | 0.6734 | 0.7904 | 0.7743 | 0.7986 | 0.7878 | 0.7834 | 0.7575 | 0.7539 |
| 846 | cg25651505 | 0.2782 | 0.2013 | 0.1834 | 0.2379 | 0.1751 | 0.1623 | 0.1983 | 0.1292 | 0.1992 | 0.1761 | 0.2619 | 0.2148 | 0.2114 | 0.1662 |
| 847 | cg25677688 | 0.7261 | 0.7601 | 0.8703 | 0.8577 | 0.6835 | 0.7786 | 0.6592 | 0.7506 | 0.7436 | 0.8720 | 0.7511 | 0.7067 | 0.7353 | 0.7609 |
| 848 | cg25692621 | 0.5956 | 0.7265 | 0.7387 | 0.7214 | 0.7460 | 0.5731 | 0.5958 | 0.7050 | 0.6581 | 0.7546 | 0.7320 | 0.7193 | 0.6673 | 0.6886 |
| 849 | cg25697314 | 0.6629 | 0.7176 | 0.7435 | 0.7840 | 0.7545 | 0.6503 | 0.6536 | 0.7604 | 0.7543 | 0.7304 | 0.7196 | 0.7050 | 0.6527 | 0.7046 |
| 850 | cg25737836 | 0.7847 | 0.8207 | 0.8387 | 0.8504 | 0.8390 | 0.7542 | 0.7341 | 0.8351 | 0.7971 | 0.8270 | 0.8384 | 0.8300 | 0.7720 | 0.7758 |
| 851 | cg25769980 | 0.7910 | 0.8805 | 0.9033 | 0.8811 | 0.8944 | 0.8083 | 0.7858 | 0.8880 | 0.8779 | 0.8919 | 0.8923 | 0.8988 | 0.8479 | 0.8666 |
| 852 | cg25864727 | 0.6847 | 0.8105 | 0.8250 | 0.8227 | 0.8399 | 0.6917 | 0.6737 | 0.8103 | 0.8062 | 0.8268 | 0.8463 | 0.8436 | 0.7535 | 0.7923 |
| 853 | cg25892041 | 0.6920 | 0.7912 | 0.8419 | 0.8085 | 0.8420 | 0.7107 | 0.7217 | 0.8058 | 0.8050 | 0.8190 | 0.8394 | 0.8021 | 0.8139 | 0.7648 |
| 854 | cg26050734 | 0.3502 | 0.3446 | 0.3582 | 0.3364 | 0.3792 | 0.3496 | 0.3569 | 0.3640 | 0.3241 | 0.3892 | 0.3361 | 0.3631 | 0.3366 | 0.3305 |
| 855 | cg26059632 | 0.5698 | 0.6991 | 0.6948 | 0.7169 | 0.6848 | 0.5758 | 0.6399 | 0.7346 | 0.6918 | 0.7263 | 0.6744 | 0.6667 | 0.6203 | 0.6752 |
| 856 | cg26073856 | 0.5332 | 0.6990 | 0.7446 | 0.6945 | 0.7167 | 0.5434 | 0.5578 | 0.7069 | 0.6831 | 0.7105 | 0.7683 | 0.6526 | 0.6763 | 0.6727 |
| 857 | cg26081812 | 0.6890 | 0.7823 | 0.8174 | 0.8206 | 0.8072 | 0.7329 | 0.7140 | 0.7805 | 0.7708 | 0.8198 | 0.8097 | 0.7923 | 0.7284 | 0.7534 |
| 858 | cg26106720 | 0.7697 | 0.8454 | 0.8761 | 0.8534 | 0.8733 | 0.7845 | 0.7466 | 0.8568 | 0.8582 | 0.8684 | 0.8692 | 0.8295 | 0.8142 | 0.8384 |
| 859 | cg26109803 | 0.6070 | 0.7646 | 0.8026 | 0.7886 | 0.7769 | 0.6658 | 0.6484 | 0.7762 | 0.7757 | 0.7891 | 0.7654 | 0.8017 | 0.7635 | 0.7752 |
| 860 | cg26117431 | 0.7244 | 0.8387 | 0.8689 | 0.8467 | 0.8623 | 0.7381 | 0.7590 | 0.8519 | 0.8294 | 0.8618 | 0.8596 | 0.8584 | 0.8385 | 0.8102 |
| 861 | cg26159933 | 0.6747 | 0.7681 | 0.7724 | 0.7734 | 0.7434 | 0.7113 | 0.6548 | 0.7776 | 0.7373 | 0.7568 | 0.7456 | 0.7354 | 0.6577 | 0.6592 |
| 862 | cg26170257 | 0.6818 | 0.7680 | 0.8163 | 0.7927 | 0.7915 | 0.6610 | 0.7101 | 0.7819 | 0.7685 | 0.7894 | 0.8008 | 0.7453 | 0.7680 | 0.7570 |
| 863 | cg26205432 | 0.4813 | 0.6198 | 0.7427 | 0.6883 | 0.6697 | 0.5713 | 0.5316 | 0.6332 | 0.6392 | 0.6726 | 0.6689 | 0.6268 | 0.6446 | 0.6542 |
| 864 | cg26238727 | 0.7572 | 0.8618 | 0.8891 | 0.8688 | 0.8650 | 0.7474 | 0.7461 | 0.8606 | 0.8727 | 0.8752 | 0.8587 | 0.8687 | 0.8316 | 0.8245 |
| 865 | cg26247501 | 0.6270 | 0.7408 | 0.8225 | 0.7623 | 0.7814 | 0.6347 | 0.6312 | 0.7827 | 0.7624 | 0.7977 | 0.7788 | 0.7168 | 0.7264 | 0.7366 |
| 866 | cg26256793 | 0.1929 | 0.1972 | 0.1750 | 0.2590 | 0.1875 | 0.1581 | 0.1781 | 0.1930 | 0.2098 | 0.1889 | 0.2265 | 0.2257 | 0.2425 | 0.1476 |
| 867 | cg26264314 | 0.8516 | 0.8681 | 0.8677 | 0.8856 | 0.8950 | 0.8842 | 0.8458 | 0.8445 | 0.4160 | 0.8601 | 0.9015 | 0.8221 | 0.8199 | 0.8577 |
| 868 | cg26266326 | 0.6286 | 0.8027 | 0.8519 | 0.8256 | 0.8216 | 0.6877 | 0.7009 | 0.8012 | 0.8121 | 0.8421 | 0.8249 | 0.7974 | 0.7503 | 0.7829 |
| 869 | cg26267038 | 0.0501 | 0.0409 | 0.0389 | 0.0352 | 0.5533 | 0.0485 | 0.0496 | 0.0408 | 0.0461 | 0.0404 | 0.5506 | 0.5217 | 0.5198 | 0.0593 |
| 870 | cg26390526 | 0.7616 | 0.8551 | 0.8963 | 0.8807 | 0.8904 | 0.8460 | 0.8307 | 0.8837 | 0.8519 | 0.8651 | 0.8830 | 0.8250 | 0.8446 | 0.8397 |
| 871 | cg26443244 | 0.5481 | 0.6489 | 0.7152 | 0.6879 | 0.7053 | 0.5944 | 0.5437 | 0.6651 | 0.6810 | 0.6888 | 0.6916 | 0.6045 | 0.7059 | 0.6301 |
| 872 | cg26470338 | 0.5930 | 0.7340 | 0.6610 | 0.7540 | 0.8010 | 0.6312 | 0.6221 | 0.7330 | 0.6982 | 0.7356 | 0.7199 | 0.7314 | 0.6930 | 0.7069 |
| 873 | cg26514942 | 0.6849 | 0.8245 | 0.8835 | 0.8573 | 0.8650 | 0.7185 | 0.7217 | 0.8532 | 0.8446 | 0.8728 | 0.8540 | 0.8339 | 0.7894 | 0.8291 |
| 874 | cg26532905 | 0.6204 | 0.7405 | 0.8152 | 0.7882 | 0.7821 | 0.6487 | 0.6360 | 0.7869 | 0.7714 | 0.7794 | 0.7663 | 0.7706 | 0.7735 | 0.7553 |
| 875 | cg26583078 | 0.8155 | 0.8862 | 0.9027 | 0.8826 | 0.8966 | 0.8318 | 0.7805 | 0.9044 | 0.8597 | 0.9069 | 0.8958 | 0.8684 | 0.8500 | 0.8726 |
| 876 | cg26594488 | 0.6616 | 0.7388 | 0.8108 | 0.7786 | 0.7773 | 0.6488 | 0.6156 | 0.7489 | 0.7561 | 0.7734 | 0.7465 | 0.7527 | 0.7066 | 0.7076 |
| 877 | cg26666286 | 0.7773 | 0.8163 | 0.8557 | 0.8586 | 0.8536 | 0.7745 | 0.7716 | 0.8474 | 0.8452 | 0.8501 | 0.8484 | 0.8290 | 0.8086 | 0.8175 |
| 878 | cg26675077 | 0.7556 | 0.5782 | 0.7892 | 0.7644 | 0.8797 | 0.7151 | 0.7018 | 0.7459 | 0.7418 | 0.6556 | 0.7391 | 0.6921 | 0.8162 | 0.6830 |
| 879 | cg26682500 | 0.6766 | 0.7954 | 0.8051 | 0.8087 | 0.8169 | 0.7270 | 0.6775 | 0.8089 | 0.7935 | 0.8172 | 0.8157 | 0.7603 | 0.7664 | 0.7704 |
| 880 | cg26699283 | 0.0919 | 0.0742 | 0.0845 | 0.0975 | 0.1100 | 0.0636 | 0.1170 | 0.0797 | 0.0842 | 0.0918 | 0.0914 | 0.1141 | 0.1012 | 0.0863 |
| 881 | cg26706003 | 0.4982 | 0.5073 | 0.5279 | 0.5948 | 0.5684 | 0.4222 | 0.5183 | 0.4866 | 0.4965 | 0.5805 | 0.5046 | 0.5625 | 0.5122 | 0.4759 |
| 882 | cg26766480 | 0.6154 | 0.7679 | 0.8275 | 0.7759 | 0.7727 | 0.6508 | 0.6977 | 0.7755 | 0.7811 | 0.8086 | 0.7515 | 0.7378 | 0.7149 | 0.7187 |
| 883 | cg26822175 | 0.4342 | 0.8774 | 0.4557 | 0.8873 | 0.4726 | 0.8746 | 0.8450 | 0.8813 | 0.8794 | 0.8830 | 0.4569 | 0.8746 | 0.8574 | 0.4300 |
| 884 | cg26847490 | 0.6126 | 0.7087 | 0.7443 | 0.7292 | 0.7613 | 0.6421 | 0.5943 | 0.7205 | 0.6960 | 0.7321 | 0.7459 | 0.6906 | 0.6873 | 0.6754 |
| 885 | cg26851800 | 0.6137 | 0.7926 | 0.8271 | 0.8175 | 0.8124 | 0.6929 | 0.6689 | 0.7983 | 0.7949 | 0.8131 | 0.8143 | 0.7468 | 0.7670 | 0.7551 |
| 886 | cg26853855 | 0.5296 | 0.7369 | 0.7700 | 0.7806 | 0.7650 | 0.6005 | 0.6156 | 0.7517 | 0.7388 | 0.7538 | 0.7112 | 0.6898 | 0.7071 | 0.7169 |
| 887 | cg26866014 | 0.6459 | 0.7996 | 0.8317 | 0.8041 | 0.8242 | 0.7442 | 0.6752 | 0.8031 | 0.7977 | 0.8303 | 0.7873 | 0.7987 | 0.8201 | 0.7942 |
| 888 | cg26960719 | 0.6799 | 0.7924 | 0.8331 | 0.8151 | 0.8079 | 0.6860 | 0.6795 | 0.8141 | 0.8041 | 0.8242 | 0.8145 | 0.7815 | 0.7350 | 0.7432 |
| 889 | cg26981881 | 0.6679 | 0.7839 | 0.7898 | 0.7830 | 0.7836 | 0.6784 | 0.6522 | 0.7547 | 0.7599 | 0.7912 | 0.7896 | 0.7727 | 0.7354 | 0.7193 |

|     |            |        |        |        |        |        |        |        |        |        |        |        |        |        |        |
|-----|------------|--------|--------|--------|--------|--------|--------|--------|--------|--------|--------|--------|--------|--------|--------|
| 890 | cg26987645 | 0.3416 | 0.2379 | 0.3233 | 0.2926 | 0.4142 | 0.2646 | 0.3246 | 0.3721 | 0.3454 | 0.3795 | 0.2660 | 0.4268 | 0.4249 | 0.3313 |
| 891 | cg26989103 | 0.5286 | 0.6537 | 0.6380 | 0.6685 | 0.6870 | 0.5813 | 0.5910 | 0.6638 | 0.6315 | 0.7054 | 0.6196 | 0.6443 | 0.6137 | 0.6837 |
| 892 | cg27003571 | 0.5695 | 0.6970 | 0.7520 | 0.7277 | 0.7576 | 0.6561 | 0.6226 | 0.6911 | 0.7138 | 0.7328 | 0.7084 | 0.6937 | 0.6715 | 0.6639 |
| 893 | cg27063986 | 0.7672 | 0.8830 | 0.9078 | 0.9000 | 0.9055 | 0.8107 | 0.7822 | 0.8898 | 0.8960 | 0.9091 | 0.8922 | 0.8729 | 0.8779 | 0.8784 |
| 894 | cg27105123 | 0.5059 | 0.6318 | 0.6721 | 0.6679 | 0.6155 | 0.6107 | 0.5192 | 0.6691 | 0.5845 | 0.6382 | 0.6975 | 0.5901 | 0.3306 | 0.6164 |
| 895 | cg27149093 | 0.5970 | 0.7528 | 0.8143 | 0.7821 | 0.7910 | 0.6601 | 0.6119 | 0.8010 | 0.7581 | 0.7929 | 0.8091 | 0.7797 | 0.7538 | 0.7416 |
| 896 | cg27168844 | 0.6914 | 0.7787 | 0.7884 | 0.7933 | 0.7937 | 0.6892 | 0.6748 | 0.7926 | 0.7698 | 0.7742 | 0.7214 | 0.7278 | 0.7116 | 0.7382 |
| 897 | cg27190239 | 0.5241 | 0.6422 | 0.7428 | 0.7057 | 0.7237 | 0.5602 | 0.5492 | 0.7243 | 0.7003 | 0.6894 | 0.7095 | 0.7048 | 0.6681 | 0.6903 |
| 898 | cg27195224 | 0.6398 | 0.6784 | 0.7201 | 0.7638 | 0.7118 | 0.6429 | 0.6111 | 0.7636 | 0.7350 | 0.7170 | 0.7793 | 0.6799 | 0.7051 | 0.6891 |
| 899 | cg27202708 | 0.4327 | 0.0988 | 0.2898 | 0.2296 | 0.3506 | 0.3202 | 0.3056 | 0.2260 | 0.3963 | 0.4730 | 0.4515 | 0.3419 | 0.3291 | 0.1651 |
| 900 | cg27226214 | 0.7539 | 0.8521 | 0.8313 | 0.7875 | 0.8532 | 0.7949 | 0.7153 | 0.8452 | 0.8534 | 0.8022 | 0.8472 | 0.8007 | 0.8513 | 0.8158 |
| 901 | cg27227156 | 0.5813 | 0.7522 | 0.7578 | 0.7467 | 0.7697 | 0.6846 | 0.6529 | 0.7481 | 0.7443 | 0.7899 | 0.7782 | 0.7172 | 0.7144 | 0.7290 |
| 902 | cg27297176 | 0.6220 | 0.8118 | 0.8410 | 0.8189 | 0.7098 | 0.6638 | 0.6900 | 0.8064 | 0.7847 | 0.8270 | 0.8339 | 0.7906 | 0.7564 | 0.7765 |
| 903 | cg27345534 | 0.5924 | 0.7254 | 0.7513 | 0.7869 | 0.7056 | 0.6574 | 0.6204 | 0.7246 | 0.7055 | 0.7573 | 0.7526 | 0.6455 | 0.6853 | 0.6888 |
| 904 | cg27351998 | 0.6369 | 0.8519 | 0.9008 | 0.8816 | 0.8848 | 0.7345 | 0.7366 | 0.8741 | 0.8750 | 0.8912 | 0.8777 | 0.8729 | 0.8207 | 0.8453 |
| 905 | cg27377450 | 0.8581 | 0.8853 | 0.8943 | 0.9053 | 0.9024 | 0.7362 | 0.8357 | 0.8744 | 0.8837 | 0.8873 | 0.8831 | 0.8873 | 0.8576 | 0.8839 |
| 906 | cg27456885 | 0.6457 | 0.7555 | 0.7876 | 0.7811 | 0.7840 | 0.6678 | 0.6768 | 0.7725 | 0.7222 | 0.7780 | 0.7857 | 0.7869 | 0.7441 | 0.7836 |
| 907 | cg27459381 | 0.8596 | 0.8691 | 0.8434 | 0.8776 | 0.8712 | 0.8381 | 0.8048 | 0.8578 | 0.8486 | 0.8509 | 0.8545 | 0.8538 | 0.8222 | 0.8149 |
| 908 | cg27488807 | 0.6102 | 0.7338 | 0.7207 | 0.7535 | 0.7197 | 0.6315 | 0.6041 | 0.7609 | 0.7226 | 0.7450 | 0.7210 | 0.7092 | 0.6593 | 0.7285 |
| 909 | cg27497781 | 0.6670 | 0.7483 | 0.8303 | 0.7204 | 0.8231 | 0.6690 | 0.6766 | 0.7431 | 0.7360 | 0.8013 | 0.8459 | 0.7560 | 0.7588 | 0.7308 |
| 910 | cg27541541 | 0.6000 | 0.6951 | 0.7750 | 0.7548 | 0.7447 | 0.6336 | 0.6078 | 0.7176 | 0.7051 | 0.7433 | 0.7325 | 0.7489 | 0.7100 | 0.7159 |
| 911 | cg27547703 | 0.7676 | 0.8599 | 0.8668 | 0.8646 | 0.8812 | 0.7655 | 0.7633 | 0.8606 | 0.8403 | 0.8656 | 0.8688 | 0.8407 | 0.8407 | 0.8559 |
| 912 | cg27562023 | 0.6597 | 0.7429 | 0.7311 | 0.6904 | 0.7235 | 0.6911 | 0.6121 | 0.7145 | 0.7298 | 0.7231 | 0.6636 | 0.7041 | 0.6905 | 0.6776 |
| 913 | cg27585441 | 0.5687 | 0.7322 | 0.7413 | 0.7308 | 0.7178 | 0.5534 | 0.5752 | 0.7421 | 0.6796 | 0.7132 | 0.7193 | 0.7178 | 0.6696 | 0.6967 |
| 914 | cg27609819 | 0.7013 | 0.8167 | 0.8387 | 0.4571 | 0.8410 | 0.7947 | 0.7615 | 0.8370 | 0.7892 | 0.8448 | 0.8452 | 0.8276 | 0.8036 | 0.7933 |



Table S4

*Functional Annotation of Clusters of Genes that Lose Methylation in the Genomes of Institutionalized Relative to Comparison Children. There were annotated 86 of 94 genes downmethylated in the target group of children. The results of analysis have shown no statistically significant annotation clusters.*

| Annotation Cluster 1   |                                                         |       |      |        |            |          |           |                 |           |       |
|------------------------|---------------------------------------------------------|-------|------|--------|------------|----------|-----------|-----------------|-----------|-------|
| Enrichment Score: 1.24 |                                                         |       |      |        |            |          |           |                 |           |       |
| Category               | Term                                                    | Count | %    | PValue | List Total | Pop Hits | Pop Total | Fold Enrichment | Benjamini | FDR   |
| GOTERM_MF_FAT          | GO:0003924~GTPase activity                              | 5     | 5.95 | 0.0172 | 62         | 211      | 12983     | 4.96            | 0.9776    | 19.80 |
| UP_SEQ_FEATURE         | nucleotide phosphate-binding region:GTP                 | 5     | 5.95 | 0.0381 | 83         | 295      | 19113     | 3.90            | 1.0000    | 40.22 |
| SP_PIR_KEYWORDS        | gtp-binding                                             | 5     | 5.95 | 0.0521 | 83         | 329      | 19235     | 3.52            | 0.9201    | 48.52 |
| GOTERM_MF_FAT          | GO:0005525~GTP binding                                  | 5     | 5.95 | 0.0972 | 62         | 372      | 12983     | 2.81            | 0.9963    | 72.75 |
| GOTERM_MF_FAT          | GO:0032561~guanyl ribonucleotide binding                | 5     | 5.95 | 0.1045 | 62         | 382      | 12983     | 2.74            | 0.9920    | 75.43 |
| GOTERM_MF_FAT          | GO:0019001~guanyl nucleotide binding                    | 5     | 5.95 | 0.1045 | 62         | 382      | 12983     | 2.74            | 0.9920    | 75.43 |
| Annotation Cluster 2   |                                                         |       |      |        |            |          |           |                 |           |       |
| Enrichment Score: 1.08 |                                                         |       |      |        |            |          |           |                 |           |       |
| Category               | Term                                                    | Count | %    | PValue | List Total | Pop Hits | Pop Total | Fold Enrichment | Benjamini | FDR   |
| SP_PIR_KEYWORDS        | microsome                                               | 3     | 3.57 | 0.0752 | 83         | 106      | 19235     | 6.56            | 0.8789    | 62.12 |
| GOTERM_CC_FAT          | GO:0005792~microsome                                    | 4     | 4.76 | 0.0853 | 57         | 237      | 12782     | 3.78            | 0.9529    | 64.95 |
| GOTERM_CC_FAT          | GO:0042598~vesicular fraction                           | 4     | 4.76 | 0.0912 | 57         | 244      | 12782     | 3.68            | 0.8875    | 67.52 |
| Annotation Cluster 3   |                                                         |       |      |        |            |          |           |                 |           |       |
| Enrichment Score: 1.04 |                                                         |       |      |        |            |          |           |                 |           |       |
| Category               | Term                                                    | Count | %    | PValue | List Total | Pop Hits | Pop Total | Fold Enrichment | Benjamini | FDR   |
| SP_PIR_KEYWORDS        | chromoprotein                                           | 3     | 3.57 | 0.0288 | 83         | 62       | 19235     | 11.21           | 0.9367    | 30.41 |
| UP_SEQ_FEATURE         | metal ion-binding site:Iron (heme axial ligand)         | 3     | 3.57 | 0.0664 | 83         | 98       | 19113     | 7.05            | 0.9985    | 59.72 |
| SP_PIR_KEYWORDS        | heme                                                    | 3     | 3.57 | 0.0942 | 83         | 121      | 19235     | 5.75            | 0.8749    | 70.74 |
| SP_PIR_KEYWORDS        | metalloprotein                                          | 3     | 3.57 | 0.0982 | 83         | 124      | 19235     | 5.61            | 0.8583    | 72.29 |
| GOTERM_MF_FAT          | GO:0020037~heme binding                                 | 3     | 3.57 | 0.1107 | 62         | 121      | 12983     | 5.19            | 0.9862    | 77.50 |
| SP_PIR_KEYWORDS        | iron                                                    | 4     | 4.76 | 0.1221 | 83         | 285      | 19235     | 3.25            | 0.8494    | 80.15 |
| GOTERM_MF_FAT          | GO:0046906~tetrapyrrole binding                         | 3     | 3.57 | 0.1229 | 62         | 129      | 12983     | 4.87            | 0.9835    | 81.14 |
| GOTERM_MF_FAT          | GO:0005506~iron ion binding                             | 4     | 4.76 | 0.1760 | 62         | 308      | 12983     | 2.72            | 0.9788    | 91.47 |
| Annotation Cluster 4   |                                                         |       |      |        |            |          |           |                 |           |       |
| Enrichment Score: 1.03 |                                                         |       |      |        |            |          |           |                 |           |       |
| Category               | Term                                                    | Count | %    | PValue | List Total | Pop Hits | Pop Total | Fold Enrichment | Benjamini | FDR   |
| GOTERM_BP_FAT          | GO:0043066~negative regulation of apoptosis             | 5     | 5.95 | 0.0903 | 66         | 354      | 13528     | 2.90            | 1.0000    | 76.74 |
| GOTERM_BP_FAT          | GO:0043069~negative regulation of programmed cell death | 5     | 5.95 | 0.0938 | 66         | 359      | 13528     | 2.85            | 1.0000    | 78.12 |
| GOTERM_BP_FAT          | GO:0060548~negative regulation of cell death            | 5     | 5.95 | 0.0946 | 66         | 360      | 13528     | 2.85            | 1.0000    | 78.38 |

Table S5

*Functional Annotation of Clusters of Genes that Gain Methylation in the Genomes of Institutionalized Relative to Comparison Children. There were annotated 633 of 744 genes upmethylated in the target group of children. The David annotation clusters which have shown Fold Enrichment > 2.0 are listed.*

| Annotation Cluster 1 |                                         | Enrichment Score: 13.96 |       |          |            |          |           |                |           |          |
|----------------------|-----------------------------------------|-------------------------|-------|----------|------------|----------|-----------|----------------|-----------|----------|
| Category             | Term                                    | Count                   | %     | PValue   | List Total | Pop Hits | Pop Total | FoldEnrichment | Benjamini | FDR      |
| SP_PIR_KEYWORDS      | disulfide bond                          | 181                     | 28.59 | 7.65E-19 | 628        | 2924     | 19235     | 1.90           | 4.26E-16  | 1.12E-15 |
| SP_PIR_KEYWORDS      | Secreted                                | 124                     | 19.59 | 4.78E-18 | 628        | 1689     | 19235     | 2.25           | 1.33E-15  | 6.99E-15 |
| UP_SEQ_FEATURE       | disulfide bond                          | 170                     | 26.86 | 5.35E-16 | 628        | 2819     | 19113     | 1.84           | 1.34E-12  | 9.77E-13 |
| SP_PIR_KEYWORDS      | signal                                  | 185                     | 29.23 | 2.65E-15 | 628        | 3250     | 19235     | 1.74           | 4.95E-13  | 3.90E-12 |
| UP_SEQ_FEATURE       | signal peptide                          | 185                     | 29.23 | 5.08E-15 | 628        | 3250     | 19113     | 1.73           | 6.17E-12  | 8.97E-12 |
| SP_PIR_KEYWORDS      | glycoprotein                            | 223                     | 35.23 | 4.26E-14 | 628        | 4318     | 19235     | 1.58           | 5.92E-12  | 6.22E-11 |
| GOTERM_CC_FAT        | GO:0005576--extracellular region        | 139                     | 21.96 | 4.53E-14 | 475        | 2010     | 12782     | 1.86           | 1.56E-11  | 6.18E-11 |
| GOTERM_CC_FAT        | GO:0044421--extracellular region part   | 82                      | 12.95 | 1.29E-12 | 475        | 960      | 12782     | 2.30           | 2.21E-10  | 1.75E-09 |
| GOTERM_CC_FAT        | GO:0005615--extracellular space         | 65                      | 10.27 | 5.41E-12 | 475        | 685      | 12782     | 2.55           | 6.20E-10  | 7.38E-09 |
| UP_SEQ_FEATURE       | glycosylation site:N-linked (GlcNAc...) | 205                     | 32.39 | 7.48E-11 | 628        | 4129     | 19113     | 1.51           | 4.52E-08  | 1.32E-07 |
| Annotation Cluster 2 |                                         | Enrichment Score: 3.95  |       |          |            |          |           |                |           |          |
| Category             | Term                                    | Count                   | %     | PValue   | List Total | Pop Hits | Pop Total | FoldEnrichment | Benjamini | FDR      |
| SP_PIR_KEYWORDS      | glycoprotein                            | 223                     | 35.23 | 4.26E-14 | 628        | 4318     | 19235     | 1.58           | 5.92E-12  | 6.22E-11 |
| UP_SEQ_FEATURE       | glycosylation site:N-linked (GlcNAc...) | 205                     | 32.39 | 7.48E-11 | 628        | 4129     | 19113     | 1.51           | 4.52E-08  | 1.32E-07 |
| UP_SEQ_FEATURE       | topological domain:Extracellular        | 133                     | 21.01 | 1.49E-06 | 628        | 2719     | 19113     | 1.49           | 7.22E-04  | 2.63E-03 |
| UP_SEQ_FEATURE       | topological domain:Cytoplasmic          | 154                     | 24.33 | 9.50E-06 | 628        | 3374     | 19113     | 1.39           | 3.81E-03  | 1.67E-02 |
| GOTERM_CC_FAT        | GO:0005886--plasma membrane             | 165                     | 26.07 | 8.74E-03 | 475        | 3777     | 12782     | 1.18           | 2.85E-01  | 1.13E+01 |
| SP_PIR_KEYWORDS      | transmembrane                           | 188                     | 29.70 | 1.24E-02 | 628        | 4973     | 19235     | 1.16           | 2.13E-01  | 1.67E+01 |
| UP_SEQ_FEATURE       | transmembrane region                    | 187                     | 29.54 | 1.24E-02 | 628        | 4911     | 19113     | 1.16           | 8.84E-01  | 1.97E+01 |
| SP_PIR_KEYWORDS      | cell membrane                           | 91                      | 14.38 | 1.30E-02 | 628        | 2194     | 19235     | 1.27           | 2.04E-01  | 1.74E+01 |
| SP_PIR_KEYWORDS      | membrane                                | 218                     | 34.44 | 1.38E-01 | 628        | 6256     | 19235     | 1.07           | 6.93E-01  | 8.86E+01 |
| GOTERM_CC_FAT        | GO:0031224--intrinsic to membrane       | 204                     | 32.23 | 5.33E-01 | 475        | 5485     | 12782     | 1.00           | 9.79E-01  | 1.00E+02 |
| GOTERM_CC_FAT        | GO:0016021--integral to membrane        | 196                     | 30.96 | 5.72E-01 | 475        | 5297     | 12782     | 1.00           | 9.82E-01  | 1.00E+02 |
| Annotation Cluster 3 |                                         | Enrichment Score: 3.85  |       |          |            |          |           |                |           |          |
| Category             | Term                                    | Count                   | %     | PValue   | List Total | Pop Hits | Pop Total | FoldEnrichment | Benjamini | FDR      |
| GOTERM_BP_FAT        | GO:0006952--defense response            | 50                      | 7.90  | 1.08E-07 | 484        | 615      | 13528     | 2.27           | 2.47E-04  | 1.88E-04 |
| GOTERM_BP_FAT        | GO:0006954--inflammatory response       | 23                      | 3.63  | 3.13E-03 | 484        | 325      | 13528     | 1.98           | 8.35E-03  | 1.34E-03 |
| GOTERM_BP_FAT        | GO:0009611--response to wounding        | 31                      | 4.90  | 8.45E-03 | 484        | 530      | 13528     | 1.63           | 8.85E-03  | 1.18E-02 |
| Annotation Cluster 4 |                                         | Enrichment Score: 3.78  |       |          |            |          |           |                |           |          |
| Category             | Term                                    | Count                   | %     | PValue   | List Total | Pop Hits | Pop Total | FoldEnrichment | Benjamini | FDR      |
| INTERPRO             | IPR012351:Four-helical cytokine, core   | 12                      | 1.90  | 2.71E-07 | 564        | 46       | 16659     | 7.71           | 2.64E-04  | 4.27E-04 |
| INTERPRO             | IPR000471:Interferon alpha/beta/delta   | 8                       | 1.26  | 7.03E-07 | 564        | 17       | 16659     | 13.90          | 3.42E-04  | 1.11E-03 |
| SMART                | SM00076:IFabd                           | 8                       | 1.26  | 7.33E-07 | 311        | 17       | 9079      | 13.74          | 1.60E-04  | 9.32E-04 |
| PIR_SUPERFAMILY      | PIRSF001934:interferon alpha            | 8                       | 1.26  | 1.30E-06 | 322        | 15       | 7396      | 12.25          | 4.05E-04  | 1.74E-03 |
| SP_PIR_KEYWORDS      | cytokine                                | 21                      | 3.32  | 1.99E-06 | 628        | 181      | 19235     | 3.55           | 1.58E-04  | 2.91E-03 |

|                             |                                                                   |                        |      |          |            |          |           |                |           |          |
|-----------------------------|-------------------------------------------------------------------|------------------------|------|----------|------------|----------|-----------|----------------|-----------|----------|
| GOTERM_MF_FAT               | GO:0005125--cytokine activity                                     | 23                     | 3.63 | 2.18E-06 | 470        | 195      | 12983     | 3.26           | 1.58E-03  | 3.30E-03 |
| SP_PIR_KEYWORDS             | antiviral                                                         | 7                      | 1.11 | 2.81E-06 | 628        | 14       | 19235     | 15.31          | 1.96E-04  | 4.11E-03 |
| KEGG_PATHWAY                | hsa05320:Autoimmune thyroid disease                               | 12                     | 1.90 | 6.40E-06 | 216        | 51       | 5085      | 5.54           | 4.35E-04  | 7.51E-03 |
| INTERPRO                    | IPR015589:Interferon alpha                                        | 6                      | 0.95 | 4.45E-05 | 564        | 13       | 16659     | 13.63          | 1.43E-02  | 7.00E-02 |
| KEGG_PATHWAY                | hsa04060:Cytokine-cytokine receptor interaction                   | 26                     | 4.11 | 9.19E-05 | 216        | 262      | 5085      | 2.34           | 3.12E-03  | 1.08E-01 |
| KEGG_PATHWAY                | hsa04612:Antigen processing and presentation                      | 12                     | 1.90 | 6.58E-04 | 216        | 83       | 5085      | 3.40           | 1.48E-02  | 7.70E-01 |
| SP_PIR_KEYWORDS             | Antiviral defense                                                 | 9                      | 1.42 | 8.73E-04 | 628        | 62       | 19235     | 4.45           | 3.19E-02  | 1.27E+00 |
| KEGG_PATHWAY                | hsa04622:RIG-I-like receptor signaling pathway                    | 10                     | 1.58 | 2.77E-03 | 216        | 71       | 5085      | 3.32           | 3.10E-02  | 3.21E+00 |
| KEGG_PATHWAY                | hsa04620:Toll-like receptor signaling pathway                     | 12                     | 1.90 | 3.33E-03 | 216        | 101      | 5085      | 2.80           | 3.43E-02  | 3.84E+00 |
| KEGG_PATHWAY                | hsa04630:Jak-STAT signaling pathway                               | 15                     | 2.37 | 5.56E-03 | 216        | 155      | 5085      | 2.28           | 4.93E-02  | 6.34E+00 |
| KEGG_PATHWAY                | hsa04650:Natural killer cell mediated cytotoxicity                | 13                     | 2.05 | 1.01E-02 | 216        | 133      | 5085      | 2.30           | 7.77E-02  | 1.12E+01 |
| SP_PIR_KEYWORDS             | leukocyte                                                         | 4                      | 0.63 | 1.17E-02 | 628        | 15       | 19235     | 8.17           | 2.09E-01  | 1.58E+01 |
| KEGG_PATHWAY                | hsa04140:Regulation of autophagy                                  | 6                      | 0.95 | 1.49E-02 | 216        | 35       | 5085      | 4.04           | 1.07E-01  | 1.61E+01 |
| GOTERM_BP_FAT               | GO:0009615--response to virus                                     | 10                     | 1.58 | 1.60E-02 | 484        | 109      | 13528     | 2.56           | 7.85E-01  | 2.45E+01 |
| KEGG_PATHWAY                | hsa04623:Cytosolic DNA-sensing pathway                            | 7                      | 1.11 | 2.75E-02 | 216        | 55       | 5085      | 3.00           | 1.65E-01  | 2.79E+01 |
| GOTERM_MF_FAT               | GO:0005132--interferon-alpha/beta receptor binding                | 3                      | 0.47 | 3.96E-02 | 470        | 9        | 12983     | 9.21           | 7.07E-01  | 4.58E+01 |
| <b>Annotation Cluster 5</b> |                                                                   | Enrichment Score: 3.59 |      |          |            |          |           |                |           |          |
| Category                    | Term                                                              | Count                  | %    | PValue   | List Total | Pop Hits | Pop Total | FoldEnrichment | Benjamini | FDR      |
| UP_SEQ_FEATURE              | domain:C-type lectin                                              | 12                     | 1.90 | 5.17E-05 | 628        | 79       | 19113     | 4.62           | 1.77E-02  | 9.09E-02 |
| INTERPRO                    | IPR001304:C-type lectin                                           | 12                     | 1.90 | 9.48E-05 | 564        | 82       | 16659     | 4.32           | 2.28E-02  | 1.49E-01 |
| INTERPRO                    | IPR018378:C-type lectin, conserved site                           | 12                     | 1.90 | 9.48E-05 | 564        | 82       | 16659     | 4.32           | 2.28E-02  | 1.49E-01 |
| SMART                       | SM00034:CLECT                                                     | 12                     | 1.90 | 9.90E-05 | 311        | 82       | 9079      | 4.27           | 1.08E-02  | 1.26E-01 |
| INTERPRO                    | IPR016186:C-type lectin-like                                      | 12                     | 1.90 | 3.56E-04 | 564        | 95       | 16659     | 3.73           | 5.62E-02  | 5.60E-01 |
| GOTERM_MF_FAT               | GO:0005529--sugar binding                                         | 18                     | 2.84 | 7.13E-04 | 470        | 195      | 12983     | 2.55           | 1.59E-01  | 1.08E+00 |
| SP_PIR_KEYWORDS             | Lectin                                                            | 15                     | 2.37 | 7.24E-04 | 628        | 159      | 19235     | 2.89           | 2.84E-02  | 1.05E+00 |
| GOTERM_MF_FAT               | GO:0030246--carbohydrate binding                                  | 25                     | 3.95 | 2.38E-03 | 470        | 354      | 12983     | 1.95           | 2.51E-01  | 3.54E+00 |
| <b>Annotation Cluster 6</b> |                                                                   | Enrichment Score: 2.56 |      |          |            |          |           |                |           |          |
| Category                    | Term                                                              | Count                  | %    | PValue   | List Total | Pop Hits | Pop Total | FoldEnrichment | Benjamini | FDR      |
| INTERPRO                    | IPR012351:Four-helical cytokine, core                             | 12                     | 1.90 | 2.71E-07 | 564        | 46       | 16659     | 7.71           | 2.64E-04  | 4.27E-04 |
| BIOCARTA                    | h_cytokinePathway:Cytokine Network                                | 4                      | 0.63 | 2.67E-02 | 49         | 20       | 1437      | 5.87           | 9.40E-01  | 2.62E+01 |
| BIOCARTA                    | h_inflamPathway:Cytokines and Inflammatory Response               | 4                      | 0.63 | 5.31E-02 | 49         | 26       | 1437      | 4.51           | 7.58E-01  | 4.56E+01 |
| BIOCARTA                    | h_dcPathway:Dendritic cells in regulating TH1 and TH2 Development | 3                      | 0.47 | 1.54E-01 | 49         | 21       | 1437      | 4.19           | 9.44E-01  | 8.45E+01 |
| <b>Annotation Cluster 7</b> |                                                                   | Enrichment Score: 2.52 |      |          |            |          |           |                |           |          |
| Category                    | Term                                                              | Count                  | %    | PValue   | List Total | Pop Hits | Pop Total | FoldEnrichment | Benjamini | FDR      |
| GOTERM_MF_FAT               | GO:0008527--taste receptor activity                               | 6                      | 0.95 | 1.34E-04 | 470        | 15       | 12983     | 11.05          | 4.76E-02  | 2.03E-01 |
| INTERPRO                    | IPR007960:Mammalian taste receptor                                | 7                      | 1.11 | 1.87E-04 | 564        | 26       | 16659     | 7.95           | 3.58E-02  | 2.95E-01 |
| SP_PIR_KEYWORDS             | Taste                                                             | 7                      | 1.11 | 7.23E-04 | 628        | 34       | 19235     | 6.31           | 3.05E-02  | 1.05E+00 |
| GOTERM_BP_FAT               | GO:0050909--sensory perception of taste                           | 7                      | 1.11 | 4.48E-03 | 484        | 44       | 13528     | 4.45           | 8.20E-01  | 7.54E+00 |
| KEGG_PATHWAY                | hsa04742:Taste transduction                                       | 7                      | 1.11 | 2.14E-02 | 216        | 52       | 5085      | 3.17           | 1.43E-01  | 2.24E+01 |
| GOTERM_BP_FAT               | GO:0007606--sensory perception of chemical stimulus               | 19                     | 3.00 | 4.43E-01 | 484        | 478      | 13528     | 1.11           | 9.97E-01  | 1.00E+02 |
| <b>Annotation Cluster 8</b> |                                                                   | Enrichment Score: 2.39 |      |          |            |          |           |                |           |          |
| Category                    | Term                                                              | Count                  | %    | PValue   | List Total | Pop Hits | Pop Total | FoldEnrichment | Benjamini | FDR      |
| KEGG_PATHWAY                | hsa00980:Metabolism of xenobiotics by cytochrome                  | 14                     | 2.21 | 8.52E-07 | 216        | 60       | 5085      | 5.49           | 1.16E-04  | 1.00E-03 |

|                              |                                                    |                        |       |          |            |          |           |                |           |          |
|------------------------------|----------------------------------------------------|------------------------|-------|----------|------------|----------|-----------|----------------|-----------|----------|
|                              | P450                                               |                        |       |          |            |          |           |                |           |          |
| KEGG_PATHWAY                 | hsa00982:Drug metabolism                           | 13                     | 2.05  | 7.98E-06 | 216        | 62       | 5085      | 4.94           | 3.62E-04  | 9.37E-03 |
| INTERPRO                     | IPR002213:UDP-glucuronosyl/UDP-glucosyltransferase | 6                      | 0.95  | 4.45E-05 | 564        | 13       | 16659     | 13.63          | 1.43E-02  | 7.00E-02 |
| KEGG_PATHWAY                 | hsa00140:Steroid hormone biosynthesis              | 10                     | 1.58  | 1.03E-04 | 216        | 46       | 5085      | 5.12           | 2.79E-03  | 1.20E-01 |
| PIR_SUPERFAMILY              | PIRSF005678:glucuronosyltransferase                | 6                      | 0.95  | 1.44E-04 | 322        | 13       | 7396      | 10.60          | 2.23E-02  | 1.94E-01 |
| KEGG_PATHWAY                 | hsa00040:Pentose and glucuronate interconversions  | 6                      | 0.95  | 7.04E-04 | 216        | 18       | 5085      | 7.85           | 1.36E-02  | 8.23E-01 |
| KEGG_PATHWAY                 | hsa00150:Androgen and estrogen metabolism          | 8                      | 1.26  | 7.63E-04 | 216        | 37       | 5085      | 5.09           | 1.29E-02  | 8.92E-01 |
| KEGG_PATHWAY                 | hsa00500:Starch and sucrose metabolism             | 8                      | 1.26  | 1.67E-03 | 216        | 42       | 5085      | 4.48           | 2.49E-02  | 1.94E+00 |
| KEGG_PATHWAY                 | hsa00830:Retinol metabolism                        | 9                      | 1.42  | 1.74E-03 | 216        | 54       | 5085      | 3.92           | 2.34E-02  | 2.02E+00 |
| KEGG_PATHWAY                 | hsa00860:Porphyrin and chlorophyll metabolism      | 7                      | 1.11  | 2.26E-03 | 216        | 33       | 5085      | 4.99           | 2.76E-02  | 2.62E+00 |
| SP_PIR_KEYWORDS              | hexosyltransferase                                 | 6                      | 0.95  | 3.52E-03 | 628        | 32       | 19235     | 5.74           | 9.34E-02  | 5.02E+00 |
| SP_PIR_KEYWORDS              | glycosyltransferase                                | 16                     | 2.53  | 4.54E-03 | 628        | 214      | 19235     | 2.29           | 1.14E-01  | 6.44E+00 |
| KEGG_PATHWAY                 | hsa00053:Ascorbate and aldarate metabolism         | 5                      | 0.79  | 4.79E-03 | 216        | 17       | 5085      | 6.92           | 4.56E-02  | 5.48E+00 |
| GOTERM_MF_FAT                | GO:0015020--glucuronosyltransferase activity       | 5                      | 0.79  | 7.33E-03 | 470        | 22       | 12983     | 6.28           | 4.15E-01  | 1.06E+01 |
| KEGG_PATHWAY                 | hsa00983:Drug metabolism                           | 7                      | 1.11  | 8.76E-03 | 216        | 43       | 5085      | 3.83           | 7.21E-02  | 9.82E+00 |
| GOTERM_BP_FAT                | GO:0008202--steroid metabolic process              | 15                     | 2.37  | 1.37E-02 | 484        | 202      | 13528     | 2.08           | 8.11E-01  | 2.14E+01 |
| SP_PIR_KEYWORDS              | microsome                                          | 9                      | 1.42  | 2.26E-02 | 628        | 106      | 19235     | 2.60           | 2.56E-01  | 2.84E+01 |
| GOTERM_BP_FAT                | GO:0006805--xenobiotic metabolic process           | 4                      | 0.63  | 3.28E-02 | 484        | 20       | 13528     | 5.59           | 8.81E-01  | 4.42E+01 |
| GOTERM_BP_FAT                | GO:0009410--response to xenobiotic stimulus        | 4                      | 0.63  | 4.72E-02 | 484        | 23       | 13528     | 4.86           | 9.05E-01  | 5.70E+01 |
| GOTERM_BP_FAT                | GO:0008210--estrogen metabolic process             | 3                      | 0.47  | 4.73E-02 | 484        | 10       | 13528     | 8.39           | 9.02E-01  | 5.71E+01 |
| GOTERM_BP_FAT                | GO:0034754--cellular hormone metabolic process     | 6                      | 0.95  | 5.89E-02 | 484        | 59       | 13528     | 2.84           | 9.21E-01  | 6.54E+01 |
| GOTERM_BP_FAT                | GO:0042445--hormone metabolic process              | 8                      | 1.26  | 8.49E-02 | 484        | 106      | 13528     | 2.11           | 9.29E-01  | 7.88E+01 |
| GOTERM_BP_FAT                | GO:0010817--regulation of hormone levels           | 10                     | 1.58  | 9.16E-02 | 484        | 151      | 13528     | 1.85           | 9.32E-01  | 8.13E+01 |
| GOTERM_CC_FAT                | GO:0005792--microsome                              | 14                     | 2.21  | 1.02E-01 | 475        | 237      | 12782     | 1.59           | 6.43E-01  | 7.70E+01 |
| GOTERM_CC_FAT                | GO:0042598--vesicular fraction                     | 14                     | 2.21  | 1.20E-01 | 475        | 244      | 12782     | 1.54           | 6.86E-01  | 8.26E+01 |
| SP_PIR_KEYWORDS              | endoplasmic reticulum                              | 22                     | 3.48  | 7.15E-01 | 628        | 713      | 19235     | 0.95           | 9.91E-01  | 1.00E+02 |
| <b>Annotation Cluster 9</b>  |                                                    | Enrichment Score: 2.16 |       |          |            |          |           |                |           |          |
| Category                     | Term                                               | Count                  | %     | PValue   | List Total | Pop Hits | Pop Total | FoldEnrichment | Benjamini | FDR      |
| UP_SEQ_FEATURE               | domain:Albumin 3                                   | 3                      | 0.47  | 6.17E-03 | 628        | 4        | 19113     | 22.83          | 7.76E-01  | 1.03E+01 |
| UP_SEQ_FEATURE               | domain:Albumin 1                                   | 3                      | 0.47  | 6.17E-03 | 628        | 4        | 19113     | 22.83          | 7.76E-01  | 1.03E+01 |
| UP_SEQ_FEATURE               | domain:Albumin 2                                   | 3                      | 0.47  | 6.17E-03 | 628        | 4        | 19113     | 22.83          | 7.76E-01  | 1.03E+01 |
| INTERPRO                     | IPR014760:Serum albumin, N-terminal                | 3                      | 0.47  | 6.54E-03 | 564        | 4        | 16659     | 22.15          | 4.72E-01  | 9.81E+00 |
| SMART                        | SM00103:ALBUMIN                                    | 3                      | 0.47  | 6.66E-03 | 311        | 4        | 9079      | 21.89          | 3.86E-01  | 8.15E+00 |
| INTERPRO                     | IPR000264:Serum albumin                            | 3                      | 0.47  | 1.07E-02 | 564        | 5        | 16659     | 17.72          | 5.51E-01  | 1.55E+01 |
| <b>Annotation Cluster 10</b> |                                                    | Enrichment Score: 2.01 |       |          |            |          |           |                |           |          |
| Category                     | Term                                               | Count                  | %     | PValue   | List Total | Pop Hits | Pop Total | FoldEnrichment | Benjamini | FDR      |
| GOTERM_CC_FAT                | GO:0044459--plasma membrane part                   | 105                    | 16.59 | 4.24E-03 | 475        | 2203     | 12782     | 1.28           | 3.06E-01  | 5.63E+00 |
| GOTERM_CC_FAT                | GO:0031226--intrinsic to plasma membrane           | 61                     | 9.64  | 1.28E-02 | 475        | 1215     | 12782     | 1.35           | 3.31E-01  | 1.61E+01 |
| GOTERM_CC_FAT                | GO:0005887--integral to plasma membrane            | 59                     | 9.32  | 1.77E-02 | 475        | 1188     | 12782     | 1.34           | 3.36E-01  | 2.16E+01 |

Table S6

*Functional Annotation of 744 Genes that Gain Methylation in the Genomes of Institutionalized Relative to Comparison Children in Terms of Expression of These Genes in Different Tissues.*

*The most statistically significant annotation clusters, for which the Benjamini corrections of the scores  $< 0.05$ , are listed.*

| <b>Term</b>          | <b>Count</b> | <b>%</b> | <b>PValue</b> | <b>Fold Enrichment</b> | <b>Benjamini</b> | <b>FDR</b> |
|----------------------|--------------|----------|---------------|------------------------|------------------|------------|
| BM-CD105+Endothelial | 199          | 31.43    | 1.13E-12      | 1.55                   | 8.82E-11         | 1.20E-09   |
| Embryo_development   | 290          | 45.81    | 2.88E-10      | 1.31                   | 1.10E-08         | 3.03E-07   |
| Tongue               | 171          | 27.01    | 6.76E-10      | 1.52                   | 2.64E-08         | 7.16E-07   |
| Liver                | 137          | 21.64    | 1.13E-08      | 1.59                   | 2.86E-07         | 1.19E-05   |
| Smooth Muscle        | 186          | 29.38    | 1.83E-08      | 1.42                   | 4.75E-07         | 1.93E-05   |
| Whole blood          | 199          | 31.44    | 2.54E-08      | 1.39                   | 4.95E-07         | 2.69E-05   |
| Cerebellum           | 383          | 60.51    | 5.83E-08      | 1.15                   | 9.10E-07         | 6.17E-05   |
| Spinalcord           | 111          | 17.54    | 6.00E-08      | 1.64                   | 7.80E-07         | 6.35E-05   |
| Salivarygland        | 391          | 61.77    | 4.99E-07      | 1.13                   | 5.56E-06         | 5.28E-04   |
| Muscle               | 161          | 25.43    | 1.88E-06      | 1.40                   | 3.57E-05         | 1.97E-03   |
| Cingulate Cortex     | 110          | 17.38    | 3.63E-06      | 1.52                   | 3.54E-05         | 3.84E-03   |
| Uterus               | 118          | 18.64    | 1.54E-04      | 1.37                   | 1.34E-03         | 1.63E-01   |
| Skeletal muscle      | 35           | 5.53     | 3.34E-04      | 1.93                   | 4.05E-02         | 4.32E-01   |
| Amygdala             | 126          | 19.9     | 7.49E-04      | 1.30                   | 4.86E-03         | 7.90E-01   |
| Trigeminal Ganglion  | 71           | 11.21    | 0.001823      | 1.43                   | 1.09E-02         | 1.91E+00   |
| Skin                 | 75           | 11.84    | 0.002005      | 1.40                   | 1.11E-02         | 2.10E+00   |
| Lung                 | 183          | 28.90    | 0.002151      | 1.20                   | 3.22E-02         | 2.24E+00   |
| Retina               | 21           | 3.32     | 0.008635      | 1.88                   | 3.01E-01         | 1.06E+01   |
| Temporal Lobe        | 117          | 18.48    | 0.009531      | 1.23                   | 4.06E-02         | 9.63E+00   |
